# Supplementary material for: Crosslinker nanocarrier-based intratumoral delivery for protein complex mapping in mitochondria of live tumor-bearing mice
Source: Royal Society of Chemistry journal article supplement (doi:10.1039/d6sc00098c), 2026-03-23
Supplement: d6sc00098c1.xlsx [file d6sc00098c1.xlsx]

## Sheet: Figure 2
Figure 2a: According to the SubMitoLocalization of the proteins in MitoCarta3, the mitochondrial inter-cross-linked peptides detected in all fractions were sorted and displayed according to the SubMitoLocalization of connexins.
protein1	MitoCarta3.0_SubMitoLocalization-1	protein2	MitoCarta3.0_SubMitoLocalization-2		Combine score
CHCHD3	MIM	ACLY	Matrix		-	Note1: "-" represents unannotated protein-protein interactions in the STRING database
ABCD1	Membrane	SUPV3L1	Matrix		-	Note2: Detected protein-protein interactions unannotated in the STRING database are shown in red
PHB2	MIM	PHB	MIM		0.999	Note3: Detected protein-protein interactions annotated in the STRING database are shown in black
LACTB2	Matrix	HIBADH	Matrix		0.379
CYCS	IMS	FAM162A	MIM		0.161
CYCS	IMS	GFM2	Matrix		-
SLC25A4	MIM	ACACA	Matrix		-
SLC25A6	MIM	ACACA	Matrix		-
SLC25A5	MIM	ACACA	Matrix		-
DMGDH	Matrix	LONP1	Matrix		-
PTPMT1	MIM	CPOX	MIM		-
ADCK1	unknown	COX5A	MIM		-
NAXD	MIM	NAXD	MIM		-
ATP5MPL	MIM	PREPL	Matrix		-
ATP5F1D	MIM	ATP5F1E	MIM		0.999
PHB2	MIM	PHB	MIM		0.999
LDHB	unknown	MTHFD1L	Matrix		0.215
MSRA	Matrix	GLOD4	Matrix		0.427
PARL	MIM	ALDH4A1	Matrix		-
SETD9	Matrix	TIMM10	MIM		-
TIMM8A	MIM	COASY	Matrix		-
GUF1	Matrix	AIFM1	MIM		-
ACADS	Matrix	BCL2L10	MOM
SUGCT	Matrix	NAXD	MIM
MRPL40	Matrix	NDUFA5	MIM		0.156
STOM	Membrane	SUPV3L1	Matrix
CHDH	MIM	IARS2	Matrix
DLST	Matrix	TXNRD1	unknown		0.769
PNPLA8	MIM	MCU	MIM
MRPS28	Matrix	PNPLA8	MIM
PHB2	MIM	PHB	MIM		0.999
ACACA	Matrix	DNA2	Matrix
GATB	Matrix	MRPL10	Matrix		0.198
TMEM205	Membrane	ECI2	Matrix
COX4I1	MIM	ACADL	MIM		0.325
RARS2	Matrix	METTL5	Matrix		-
NDUFAF7	MIM	OXA1L	MIM		0.18
ACSF2	Matrix	IDI1	Matrix		0.165
TRAP1	Matrix	DNM1L	MOM		0.306
TEFM	Matrix	UQCRB	MIM		0.226
FAM136A	IMS	CYC1	MIM		-
ALDH6A1	MIM	COA6	IMS		0.154
TK2	Matrix	SFXN1	MIM		-
LETM1	MIM	DHX30	Matrix		-
PRDX2	unknown	C3orf33	Matrix		-
PRKN	MOM	LIG3	Matrix		-
PHB2	MIM	PHB	MIM		0.999
C3orf33	Matrix	CASP8	MOM		-
ADCY10	Membrane	PCCB	Matrix		-
CS	Matrix	PYCR2	Matrix		0.346
PHB2	MIM	PHB	MIM		0.999
HSPE1	Matrix	HSPE1	Matrix		-
APEX1	Matrix	GFM1	Matrix		0.178
APEX1	Matrix	GFM1	Matrix		0.178
YARS2	Matrix	MTIF2	Matrix		0.578
ACSL6	MOM	ABCB10	MIM		0.226
HSPD1	Matrix	MRPS35	Matrix		0.335
TRUB2	Matrix	UCP1	MIM		-
FAM162A	MIM	AKR7A2	Matrix		0.23
HSPD1	Matrix	GSR	Matrix		0.414
MRPL37	Matrix	OPA1	MIM		-
ATP5F1A	MIM	HSPD1	Matrix		0.823
DNA2	Matrix	COX7B2	MIM		-
ATAD3A	MIM	SUCLG1	Matrix		-
LIAS	Matrix	ACADVL	MIM		0.204
VWA8	Matrix	TBRG4	Matrix		0.21
ALAS1	Matrix	ABCA9	Membrane		-
ATP5PO	MIM	ATP5PB	MIM		0.999
EHHADH	unknown	FASTKD3	Matrix		-
MMUT	Matrix	SUOX	IMS		-
OCIAD2	unknown	BCL2L10	MOM		-
SPIRE1	MOM	OPA3	MOM		-
ACACB	MOM	CKMT1B	MIM		0.175
HADHA	MIM	QTRT1	Matrix		-
AURKAIP1	Matrix	NDUFA2	MIM		0.305
PHB2	MIM	PHB	MIM		0.999
COX6C	MIM	GARS1	Matrix		-
NAXD	MIM	LETM1	MIM		-
TSFM	Matrix	OXR1	MOM		-
HADHA	MIM	NSUN3	Matrix		-
DLAT	Matrix	LONP1	Matrix		0.297
SLC25A13	MIM	LYPLAL1	unknown		-
FAM210A	MIM	MTG1	Matrix		-
MRPS15	Matrix	MCU	MIM		-
HADH	Matrix	TRUB2	Matrix		-
GSTK1	Matrix	GSTK1	Matrix		-
MRPS18A	Matrix	BCO2	MIM		-
RHOT1	MOM	TOP1MT	Matrix		-
DNAJC15	MIM	GLOD4	Matrix		-
SLC25A12	MIM	SLC25A12	MIM		-
PRXL2A	Membrane	DAP3	Matrix		-
ETFB	Matrix	MRPS7	Matrix		0.258
ETFB	Matrix	MRPS7	Matrix		0.258
ETFB	Matrix	MRPL42	Matrix		-
LIPT1	Matrix	IDE	Matrix		-
EXOG	MIM	PNPLA8	MIM		-
DHX30	Matrix	ECI2	Matrix		-
CCDC90B	MIM	MRPS31	Matrix		-
THG1L	Matrix	TACO1	Matrix		0.279
COA7	IMS	ATP5MD	MIM		-
CASP9	IMS	APOO	MIM		-
AFG1L	MIM	MTFR1	Membrane		-
EXD2	Matrix	TMEM126A	MIM		-
GTPBP3	Matrix	PTCD3	Matrix		-
UQCC3	MIM	DNAJA3	Matrix		-
ATAD1	MOM	MRPS15	Matrix		-
NDUFV3	MIM	AGPAT4	MOM		-
DIABLO	IMS	ARMCX2	Membrane		-
SAMM50	MOM	MIGA2	MOM		-
TAMM41	MIM	MRPS21	Matrix		-
MRPS9	Matrix	CA5B	Matrix		-
DLST	Matrix	SUPV3L1	Matrix		0.265
NDUFA10	MIM	BAX	MOM		-
ATP5PB	MIM	BCL2A1	MOM		-
HMGCS2	Matrix	VARS2	Matrix		-
COA7	IMS	TFAM	Matrix		-
NRDC	Matrix	TBRG4	Matrix		-
MRPL12	Matrix	SCO1	MIM		0.241
SNAP29	IMS	ABCA9	Membrane		-
ATP5PF	MIM	ATP5PD	MIM		0.999
MTG2	Matrix	MRPL52	Matrix		0.812
DHX30	Matrix	TRUB2	Matrix		0.382
HSPD1	Matrix	SND1	unknown		-
HSPD1	Matrix	MDH2	Matrix		0.613
PDK1	Matrix	SHMT2	Matrix		0.449
STOML2	MIM	ATP5MD	MIM		-
RPUSD4	Matrix	C6orf136	Matrix		-
UQCRC2	MIM	UQCRB	MIM		0.999
FARS2	Matrix	ALDH1L1	Matrix		-
FARS2	Matrix	ALDH1L2	Matrix		-
PRDX4	IMS	PRDX2	unknown		0.213
PRDX4	IMS	PRDX2	unknown		0.213
QDPR	Matrix	PRIMPOL	Matrix		-
MRPS7	Matrix	ACOT7	Matrix		-
TMEM126B	MIM	HIBCH	Matrix		-
SDHB	MIM	MRPS26	Matrix		-
CAT	IMS	PNPT1	Matrix|IMS		-
HADH	Matrix	TACO1	Matrix		-
MRPL37	Matrix	MFN2	MOM		-
EFHD1	MIM	CPS1	Matrix		-
AK4	Matrix	LACTB2	Matrix		-
PAICS	Matrix	VPS13D	MOM		-
NDUFS7	MIM	OGDH	Matrix		0.393
PRODH	MIM	SLC25A39	MIM		-
PDHA2	Matrix	SDHC	MIM		0.348
PDHA1	Matrix	SDHC	MIM		0.456
TCAIM	Matrix	FASTKD3	Matrix		-
SLC25A1	MIM	TWNK	Matrix		-
MYG1	Matrix	PPA2	Matrix		-
PRDX5	Matrix	CLPB	IMS		0.225
MTX2	MOM	TIMM44	MIM		0.388
HARS2	Matrix	IDH2	Matrix		-
COX7C	MIM	GUF1	Matrix		-
CEP89	IMS	NNT	MIM		-
ALDH4A1	Matrix	CS	Matrix		0.564
ALDH4A1	Matrix	MRPL41	Matrix		-
LETM2	MIM	SUGCT	Matrix		-
ME2	Matrix	IMMT	MIM		0.183
PREPL	Matrix	WARS2	Matrix		-
RPUSD3	Matrix	MRPS28	Matrix		0.227
C15orf48	Membrane	PISD	MIM		-
MFF	MOM	HDHD3	Matrix		-
MACROD1	Matrix	ATP5MF-PTCD1	unknown		-
MACROD1	Matrix	PTCD1	Matrix		-
COQ2	MIM	HSPA9	Matrix		0.714
CISD3	Matrix	MTG2	Matrix		-
MALSU1	Matrix	SIRT3	Matrix		0.216
PTRH2	MOM	ALDH4A1	Matrix		-
UNG	Matrix	CPS1	Matrix		-
PREPL	Matrix	MCL1	MOM		-
TK2	Matrix	SETD9	Matrix		-
PHB2	MIM	PHB	MIM		0.999
TRMT1	Matrix	FDXR	Matrix		-
ACO2	Matrix	USP30	MOM		-
CPT2	MIM	POLQ	Matrix		-
COX14	MIM	MRPL48	Matrix		0.192
GSR	Matrix	SLC25A51	MIM		-
ARMCX2	Membrane	TARS2	Matrix		-
MRPL48	Matrix	MCL1	MOM		-
HSPA9	Matrix	GRPEL1	Matrix		0.999
ATP5PB	MIM	ATP5PD	MIM		0.999
HSPA9	Matrix	TRAP1	Matrix		0.793
TIMM44	MIM	TOP1MT	Matrix		-
GADD45GIP1	Matrix	FAM136A	IMS		-
GADD45GIP1	Matrix	CROT	unknown		-
FASTK	MIM	GARS1	Matrix		-
SLC25A24	MIM	SUGCT	Matrix		-
ABHD11	Matrix	PDHX	Matrix		0.254
AASS	Matrix	PNPT1	Matrix|IMS		-
FASN	IMS	GRPEL1	Matrix		-
FASN	IMS	PLSCR3	MIM		-
ABCD3	Membrane	NDUFAF6	MIM		-
PABPC5	Matrix	METTL8	Matrix		-
EXD2	Matrix	FASTK	MIM		-
SPIRE1	MOM	ALDH5A1	Matrix		0.159
KYAT3	Matrix	PRIMPOL	Matrix		-
SPRYD4	Matrix	CRY1	unknown		-
ATP5F1A	MIM	ARMCX3	MOM		-
ATP5F1A	MIM	TWNK	Matrix		-
ATP5F1A	MIM	ATP5F1B	MIM		0.999
VDAC2	MOM	SLC25A20	MIM		0.236
ATP5F1C	MIM	MCRIP2	unknown		-
COQ2	MIM	STARD7	IMS		-
MRPS12	Matrix	NNT	MIM		-
BCAT2	Matrix	THG1L	Matrix		-
RARS2	Matrix	TBRG4	Matrix		0.177
ABCD1	Membrane	FAM136A	IMS		-
OXR1	MOM	GPAT2	MOM		-
SLC25A36	MIM	TIMM50	MIM		-
PRSS35	unknown	EXOG	MIM		-
SUPV3L1	Matrix	CCDC127	Membrane		-
PHB2	MIM	PHB	MIM		0.999
NDUFS4	MIM	CPS1	Matrix		-
HARS2	Matrix	MTO1	Matrix		0.217
TFAM	Matrix	NSUN4	Matrix		0.234
LYRM2	Matrix	CMPK2	Matrix		-
PREPL	Matrix	CHCHD7	IMS		-
Figure 2b: GO analysis results of the identified unannotated protein-protein interactions categorized by the biological process.
Term	Count	Ratio	P-Value
mitochondrion organization	23	9.6	5.8e-21
mitochondrial translation	21	8.8	3.9e-20
mitochondrial fusion	10	4.2	4.3e-13
proton transmembrane transport	16	6.7	2e-09
fatty acid beta-oxidation	10	4.2	4e-09
cristae formation	6	2.5	7.4e-07
mitochondrial ATP transmembrane transport	5	2.1	1.1e-06
regulation of mitochondrial translation	5	2.1	1.1e-06
tRNA aminoacylation for protein translation	6	2.5	6.7e-06
mitochondrial electron transport, cytochrome c to oxygen	6	2.5	6.7e-06
proton motive force-driven mitochondrial ATP synthesis	8	3.3	9.3e-06
biosynthetic process	6	2.5	2.5e-05
ATP biosynthetic process	5	2.1	4.5e-05
mitochondrial calcium ion transmembrane transport	5	2.1	4.5e-05
mitochondrial respiratory chain complex assembly	4	1.7	5e-05
inner mitochondrial membrane organization	5	2.1	5.7e-05
cellular respiration	6	2.5	0.0001
cell redox homeostasis	6	2.5	0.00011
mitochondrial DNA repair	4	1.7	0.00012
aerobic respiration	7	2.9	0.00014
mitochondrial respiratory chain complex I assembly	7	2.9	0.00014
mitochondrial DNA replication	4	1.7	0.00017
generation of precursor metabolites and energy	6	2.5	0.00018
proton motive force-driven ATP synthesis	5	2.1	0.00021
release of cytochrome c from mitochondria	5	2.1	0.00021
translation	11	4.6	0.0003
mitochondrial genome maintenance	4	1.7	0.0003
response to growth hormone	4	1.7	0.00039
adaptive thermogenesis	4	1.7	0.00049
regulation of mitochondrial membrane potential	5	2.1	0.00053
positive regulation of mitophagy	4	1.7	0.00061
tricarboxylic acid cycle	5	2.1	0.00074
NADPH regeneration	3	1.2	0.00077
base-excision repair	5	2.1	0.00082
mitochondrial fission	4	1.7	0.00089
cellular response to oxidative stress	7	2.9	0.0012
mitochondrial ADP transmembrane transport	3	1.2	0.0013
positive regulation of mitochondrial translation	4	1.7	0.0015
regulation of mitochondrion organization	4	1.7	0.0015
protein import into mitochondrial matrix	4	1.7	0.0017
cellular oxidant detoxification	6	2.5	0.0017
mitochondrial membrane organization	3	1.2	0.0019
mitochondrial RNA processing	3	1.2	0.0019
positive regulation of mitochondrial fission	4	1.7	0.0019
fatty acid metabolic process	7	2.9	0.002
intrinsic apoptotic signaling pathway	5	2.1	0.002
intrinsic apoptotic signaling pathway in response to DNA damage	5	2.1	0.0024
regulation of mitochondrial mRNA stability	3	1.2	0.0026
tRNA processing	5	2.1	0.0032
cardiolipin biosynthetic process	3	1.2	0.0035
response to oxidative stress	7	2.9	0.0036
fatty acid biosynthetic process	5	2.1	0.0039
protein targeting to mitochondrion	4	1.7	0.0043
mitochondrial large ribosomal subunit assembly	3	1.2	0.0045
double-strand break repair via alternative nonhomologous end joining	3	1.2	0.0055
homocysteine metabolic process	3	1.2	0.0055
midgut development	3	1.2	0.0055
extrinsic apoptotic signaling pathway in absence of ligand	4	1.7	0.0057
DNA biosynthetic process	4	1.7	0.0057
response to glucagon	3	1.2	0.0067
regulation of cellular response to oxidative stress	3	1.2	0.0067
mitochondrial protein catabolic process	3	1.2	0.0067
positive regulation of neuron apoptotic process	5	2.1	0.0069
one-carbon metabolic process	4	1.7	0.0074
mitochondrial transmembrane transport	3	1.2	0.008
apoptotic process	16	6.7	0.0088
aminoacyl-tRNA metabolism involved in translational fidelity	3	1.2	0.0094
CDP-diacylglycerol biosynthetic process	3	1.2	0.0094
regulation of apoptotic process	9	3.8	0.0097
mitochondrial electron transport, ubiquinol to cytochrome c	3	1.2	0.011
apoptotic signaling pathway	5	2.1	0.012
base-excision repair, gap-filling	3	1.2	0.012
negative regulation of mitochondrial outer membrane permeabilization involved in apoptotic signaling pathway	3	1.2	0.012
apoptotic mitochondrial changes	3	1.2	0.016
negative regulation of apoptotic process	13	5.4	0.016
mitochondrial electron transport, NADH to ubiquinone	4	1.7	0.017
negative regulation of release of cytochrome c from mitochondria	3	1.2	0.022
proline metabolic process	2	0.8	0.023
stress-induced mitochondrial fusion	2	0.8	0.023
deoxyribonucleoside monophosphate biosynthetic process	2	0.8	0.023
negative regulation of mitochondrial DNA replication	2	0.8	0.023
deoxycytidine metabolic process	2	0.8	0.023
thymidine metabolic process	2	0.8	0.023
carbamoyl phosphate biosynthetic process	2	0.8	0.023
protein maturation	5	2.1	0.025
execution phase of apoptosis	3	1.2	0.026
protein complex oligomerization	3	1.2	0.028
regulation of reactive oxygen species metabolic process	3	1.2	0.028
heme biosynthetic process	3	1.2	0.031
protein import into mitochondrial intermembrane space	2	0.8	0.034
10-formyltetrahydrofolate catabolic process	2	0.8	0.034
pyrimidine nucleoside salvage	2	0.8	0.034
mitochondrial RNA 3'-end processing	2	0.8	0.034
adenine nucleotide transport	2	0.8	0.034
proline catabolic process to glutamate	2	0.8	0.034
monoatomic anion homeostasis	2	0.8	0.034
regulation of respiratory system process	2	0.8	0.034
mitochondrial mRNA catabolic process	2	0.8	0.034
positive regulation of mitochondrial RNA catabolic process	2	0.8	0.034
positive regulation of apoptotic process	9	3.8	0.036
hydrogen peroxide catabolic process	3	1.2	0.041
response to food	3	1.2	0.043
amino acid metabolic process	3	1.2	0.043
regulation of cellular hyperosmotic salinity response	2	0.8	0.045
choline catabolic process	2	0.8	0.045
lagging strand elongation	2	0.8	0.045
4-hydroxyproline catabolic process	2	0.8	0.045
cellular response to oleic acid	2	0.8	0.045
mitochondrial protein quality control	2	0.8	0.045
long-chain fatty acid import into peroxisome	2	0.8	0.045
response to anesthetic	2	0.8	0.045
proline catabolic process	2	0.8	0.045
positive regulation of oxidative stress-induced neuron intrinsic apoptotic signaling pathway	2	0.8	0.045
mitochondrial cytochrome c oxidase assembly	3	1.2	0.046
tRNA modification	3	1.2	0.052
type 2 mitophagy	2	0.8	0.056
coenzyme A metabolic process	2	0.8	0.056
citrulline biosynthetic process	2	0.8	0.056
citrate metabolic process	2	0.8	0.056
acetyl-CoA metabolic process	2	0.8	0.056
response to insulin	4	1.7	0.057
reactive oxygen species metabolic process	3	1.2	0.064
nucleobase-containing compound metabolic process	3	1.2	0.064
response to toxic substance	4	1.7	0.066
carnitine metabolic process	2	0.8	0.067
adenine transport	2	0.8	0.067
cellular response to ammonium ion	2	0.8	0.067
mitochondrial RNA catabolic process	2	0.8	0.067
isocitrate metabolic process	2	0.8	0.067
regulation of apoptotic signaling pathway	2	0.8	0.067
response to cobalt ion	2	0.8	0.067
very long-chain fatty acid catabolic process	2	0.8	0.067
double-strand break repair	4	1.7	0.068
replication fork processing	3	1.2	0.07
cholesterol biosynthetic process	3	1.2	0.073
response to cAMP	3	1.2	0.073
response to xenobiotic stimulus	7	2.9	0.074
response to lipopolysaccharide	5	2.1	0.077
L-aspartate transmembrane transport	2	0.8	0.077
'de novo' pyrimidine nucleobase biosynthetic process	2	0.8	0.077
response to starvation	3	1.2	0.08
B cell activation	3	1.2	0.083
neuron apoptotic process	4	1.7	0.087
extrinsic apoptotic signaling pathway via death domain receptors	3	1.2	0.087
heme B biosynthetic process	2	0.8	0.088
fatty-acyl-CoA biosynthetic process	2	0.8	0.088
regulation of protein targeting to mitochondrion	2	0.8	0.088
negative regulation of mitochondrial fusion	2	0.8	0.088
DNA recombination	4	1.7	0.096
protein hexamerization	2	0.8	0.098
ADP transport	2	0.8	0.098
heme O biosynthetic process	2	0.8	0.098
malate-aspartate shuttle	2	0.8	0.098

## Sheet: Supplementary Figure 1
Peptide_Order	Peptide	Peptide_Mass	Modifications	Proteins	Protein_Type							Protein_A	Gene_A	Site_A	Protein_B	Gene_B	Site_B
	Spectrum_Order	Title	Charge	Precursor_Mass	Evalue	Score	Precursor_Mass_Error(Da)	Precursor_Mass_Error(ppm)	Alpha_Evalue	Beta_Evalue
1	AAAAVSSAKR(9)-GELKQR(4)	1841.02	Acetyl[ProteinN-term](0)	NP_006432 GeneID:10588 MTHFS(10)-NP_006432 GeneID:10588 MTHFS(18)/	Intra-Protein							NP_006432	GeneID:10588	MTHFS(10)	NP_006432	GeneID:10588	MTHFS(18)
	1	mice-tumour-7-F12-3-ex2_FS-65V.10383.10383.3.0.dta	3	1841.02	1.12862e-07	0.0110023	-0.001029	-0.558928	2.24054e-11	5.33406e-07
	2	mice-tumour-7-F12-1-ex2_FS-65v.10609.10609.3.0.dta	3	1841.02	3.28064e-05	0.013123	-0.003761	-2.04289	6.21973e-08	9.23544e-05
2	AAAGAFR(1)-GEAEKK(5)	1461.77	null	NP_998760 GeneID:23479 ISCU(2)-NP_055116 GeneID:23479 ISCU(141)/NP_998760 GeneID:23479 ISCU(2)-NP_998760 GeneID:23479 ISCU(166)/	Intra-Protein							NP_998760	GeneID:23479	ISCU(2)	NP_998760	GeneID:23479	ISCU(166)
	1	mice-tumour-7-F2-2-ex2-_FS-65v.3200.3200.3.0.dta	3	1461.75	0.226725	0.388849	-0.015856	-10.8471	0.107115	0.412631
3	AAEEVEAKFK(8)-QSMLEKGG(6)	2108.06	null	NP_060282 GeneID:54927 CHCHD3(173)-NP_060282 GeneID:54927 CHCHD3(225)/	Intra-Protein							NP_060282	GeneID:54927	CHCHD3(173)	NP_060282	GeneID:54927	CHCHD3(225)
	1	mice-tumour-7-F18-1-ex2_FS-65v.17942.17942.3.0.dta	3	2108.05	2.58653e-05	3.70536e-08	-0.003752	-1.77984	3.02182e-08	4.5376e-06
	2	mice-tumour-7-F18-2-ex2_FS-65v.17813.17813.3.0.dta	3	2108.05	0.000401107	4.07628e-05	-0.004472	-2.12138	1.90877e-07	0.000142412
	3	mice-tumour-7-F18-3-ex2_FS-65v.17870.17870.3.0.dta	3	2108.06	0.000368227	0.000169224	-0.002415	-1.1456	3.4623e-08	0.000179991
4	AAEEVEAKFKR(8)-QKFYWGHK(2)	2508.3	null	NP_060282 GeneID:54927 CHCHD3(173)-NP_942127 GeneID:47 ACLY(530)/NP_060282 GeneID:54927 CHCHD3(173)-NP_001087 GeneID:47 ACLY(540)/	Inter-Protein							NP_060282	GeneID:54927	CHCHD3(173)	NP_942127	GeneID:47	ACLY(530)
	1	mice-tumour-7-F6-1-ex2_FS-45v.5061.5061.6.3.dta	6	2508.31	1	0.300458	0.008623	3.43778	1	8.4469e-09
5	AAKDGANIVIAAK(3)-GIGKAIALK(4)	2249.36	null	NP_001182751 GeneID:84263 HSDL2(32)-NP_001182751 GeneID:84263 HSDL2(24)/NP_001182751 GeneID:84263 HSDL2(32)-NP_115679 GeneID:84263 HSDL2(24)/NP_115679 GeneID:84263 HSDL2(32)-NP_001182751 GeneID:84263 HSDL2(24)/NP_115679 GeneID:84263 HSDL2(32)-NP_115679 GeneID:84263 HSDL2(24)/	Intra-Protein							NP_115679	GeneID:84263	HSDL2(32)	NP_115679	GeneID:84263	HSDL2(24)
	1	mice-tumour-7-F9-1-ex2_FS-45v.16758.16758.4.0.dta	4	2249.35	0.000292281	0.000349919	-0.005418	-2.40869	3.17851e-06	0.000194793
6	AALEKK(5)-LAQAKK(5)	1454.89	null	NP_000024 GeneID:215 ABCD1(372)-NP_003162 GeneID:6832 SUPV3L1(409)/	Inter-Protein							NP_000024	GeneID:215	ABCD1(372)	NP_003162	GeneID:6832	SUPV3L1(409)
	1	mice-tumour-7-F11-1-ex2_FS-45v.23346.23346.3.0.dta	3	1454.89	0.00118329	0.532673	-0.000819	-0.562928	0.000105707	0.00262518
7	AALKLEPSNK(4)-KMLGNPSR(1)	2110.17	null	NP_036313 GeneID:23770 FKBP8(335)-NP_036313 GeneID:23770 FKBP8(367)/	Intra-Protein							NP_036313	GeneID:23770	FKBP8(335)	NP_036313	GeneID:23770	FKBP8(367)
	1	mice-tumour-7-F1-1-ex2_FS-45.10743.10743.4.1.dta	4	2110.16	0.000196362	0.214599	-0.011292	-5.35123	0.000177252	1.62e-05
8	AANDAGYFNDEMAPIEVKTK(18)-FGTKLGSDIK(4)	3386.68	null	NP_006102 GeneID:10449 ACAA2(209)-NP_006102 GeneID:10449 ACAA2(137)/	Intra-Protein							NP_006102	GeneID:10449	ACAA2(209)	NP_006102	GeneID:10449	ACAA2(137)
	1	mice-tumour-7-F19-3-ex2_FS-45v.22698.22698.4.2.dta	4	3386.68	0.00901507	0.00694841	-0.005185	-1.531	4.34756e-06	0.000459303
	2	mice-tumour-7-F19-2-ex2_FS-45v.22730.22730.4.1.dta	4	3386.68	4.18953e-05	0.00842894	-0.004266	-1.25964	5.77459e-14	4.364e-07
9	AAPAVQTKTK(8)-TLAKPNIR(4)	2064.22	null	NP_001268441 GeneID:3032 HADHB(41)-NP_001268441 GeneID:3032 HADHB(48)/NP_001268441 GeneID:3032 HADHB(41)-NP_000174 GeneID:3032 HADHB(48)/NP_001268441 GeneID:3032 HADHB(41)-NP_001268442 GeneID:3032 HADHB(26)/NP_000174 GeneID:3032 HADHB(41)-NP_001268441 GeneID:3032 HADHB(48)/NP_000174 GeneID:3032 HADHB(41)-NP_000174 GeneID:3032 HADHB(48)/NP_000174 GeneID:3032 HADHB(41)-NP_001268442 GeneID:3032 HADH…	Intra-Protein							NP_000174	GeneID:3032	HADHB(41)	NP_000174	GeneID:3032	HADHB(48)
	1	mice-tumour-7-F18-1-ex2_FS-65v.9288.9288.4.0.dta	4	2064.21	0.021994	0.000213221	-0.002631	-1.27458	0.189454	6.21083e-06
	2	mice-tumour-7-F18-2-ex2_FS-65v.9153.9153.4.2.dta	4	2064.21	0.514509	0.296272	-0.005861	-2.83933	1	0.0052726
	3	mice-tumour-7-F18-3-ex2_FS-65v.9251.9251.4.0.dta	4	2064.21	0.370175	0.352267	-0.003244	-1.57154	1	0.00244007
10	AAQNISKTIATSQNR(7)-AKQEQR(2)	2499.33	null	NP_001138303 GeneID:11331 PHB2(262)-NP_001138303 GeneID:11331 PHB2(218)/NP_001254629 GeneID:11331 PHB2(224)-NP_001138303 GeneID:11331 PHB2(218)/	Intra-Protein							NP_001138303	GeneID:11331	PHB2(262)	NP_001138303	GeneID:11331	PHB2(218)
	1	mice-tumour-7-F13-1-ex2_FS-65V.4627.4627.4.0.dta	4	2499.32	0.00119158	0.00540302	-0.006301	-2.52108	0.000234402	0.00504152
11	AAQNISKTIATSQNR(7)-FVVEKAEQQK(5)	2945.57	null	NP_001138303 GeneID:11331 PHB2(262)-NP_002625 GeneID:5245 PHB(202)/NP_001138303 GeneID:11331 PHB2(262)-NP_001268425 GeneID:5245 PHB(202)/NP_001138303 GeneID:11331 PHB2(262)-NP_001268644 GeneID:5245 PHB(202)/NP_001254629 GeneID:11331 PHB2(224)-NP_002625 GeneID:5245 PHB(202)/NP_001254629 GeneID:11331 PHB2(224)-NP_001268425 GeneID:5245 PHB(202)/NP_001254629 GeneID:11331 PHB2(224)-NP_001268644 GeneID…	Inter-Protein							NP_001138303	GeneID:11331	PHB2(262)	NP_002625	GeneID:5245	PHB(202)
	1	mice-tumour-7-F7-1-ex2_FS-45V.11248.11248.4.0.dta	4	2945.56	5.30216e-11	6.86068e-05	-0.004912	-1.66759	3.30658e-07	2.47116e-09
	2	mice-tumour-7-F7-2-ex2_FS-45V.11121.11121.4.0.dta	4	2945.56	2.41127e-07	0.00159884	-0.007427	-2.52141	2.77824e-07	3.29403e-07
	3	mice-tumour-7-F7-3-ex2_FS-45V.11310.11310.4.0.dta	4	2945.56	1.90664e-07	0.246479	-0.004647	-1.57762	1.04951e-07	1.49521e-06
12	AAQNISKTIATSQNR(7)-MLGEALSKNPGYIK(8)	3260.73	null	NP_001138303 GeneID:11331 PHB2(262)-NP_001138303 GeneID:11331 PHB2(244)/NP_001254629 GeneID:11331 PHB2(224)-NP_001138303 GeneID:11331 PHB2(244)/	Intra-Protein							NP_001138303	GeneID:11331	PHB2(262)	NP_001138303	GeneID:11331	PHB2(244)
	1	mice-tumour-7-F8-2-ex2_FS45V.15320.15320.4.2.dta	4	3260.73	0.00308411	0.000398334	-0.004359	-1.33682	4.04729e-06	0.00174078
	2	mice-tumour-7-F8-1-ex2_FS-45V.15377.15377.4.0.dta	4	3260.73	5.38354e-05	0.000767365	-0.003589	-1.10067	4.09461e-06	4.55743e-06
	3	mice-tumour-7-F8-3-ex2_FS-45v.15596.15596.4.1.dta	4	3260.73	1.17207e-07	0.0333113	-0.003457	-1.06019	2.08353e-10	4.32187e-06
13	AAQNISKTIATSQNR(7)-NPGYIKLR(6)	2700.48	null	NP_001138303 GeneID:11331 PHB2(262)-NP_001138303 GeneID:11331 PHB2(250)/NP_001138303 GeneID:11331 PHB2(262)-NP_001254629 GeneID:11331 PHB2(212)/NP_001254629 GeneID:11331 PHB2(224)-NP_001138303 GeneID:11331 PHB2(250)/NP_001254629 GeneID:11331 PHB2(224)-NP_001254629 GeneID:11331 PHB2(212)/	Intra-Protein							NP_001138303	GeneID:11331	PHB2(262)	NP_001138303	GeneID:11331	PHB2(250)
	1	mice-tumour-7-F2-3-ex2_FS-45V.13064.13064.3.0.dta	3	2700.47	1.30995e-11	1.03841e-07	-0.004044	-1.49751	1.44733e-09	6.14652e-07
	2	mice-tumour-7-F2-1-ex2_FS-45V.13021.13021.3.0.dta	3	2700.47	7.37123e-12	2.81964e-06	-0.004939	-1.82893	5.63095e-10	4.95307e-08
	3	mice-tumour-7-F2-2-ex2-_FS-45v.12921.12921.3.0.dta	3	2700.47	1.81279e-09	0.000729734	-0.00552	-2.04408	1.06685e-08	1.12631e-06
	4	mice-tumour-7-F1-2-ex2_FS-45V.12811.12811.3.0.dta	3	2700.48	0.140109	0.132268	-0.00344	-1.27385	9.06882e-05	0.429956
14	AAVLQR(1)-MAASLR(1)	1442.81	null	NP_057111 GeneID:51110 LACTB2(2)-NP_689953 GeneID:11112 HIBADH(1)/	Inter-Protein							NP_057111	GeneID:51110	LACTB2(2)	NP_689953	GeneID:11112	HIBADH(1)
	1	mice-tumour-7-F5-1-ex2_FS-45v.8275.8275.3.0.dta	3	1442.81	0.232011	0.084702	-0.003358	-2.3274	0.0534571	0.430298
15	ADEIAKAQVAR(6)-KEIPAK(1)	2036.14	Acetyl[ProteinN-term](0)	NP_005331 GeneID:3094 HINT1(7)-NP_005331 GeneID:3094 HINT1(25)/	Intra-Protein							NP_005331	GeneID:3094	HINT1(7)	NP_005331	GeneID:3094	HINT1(25)
	1	mice-tumour-7-F9-1-ex2_FS-65v.16452.16452.3.0.dta	3	2036.13	0.00668233	8.25899e-06	-0.003809	-1.8707	3.95173e-11	0.00177858
	2	mice-tumour-7-F9-1-ex2_FS-65v.16521.16521.3.0.dta	3	2036.14	0.0140952	0.000373937	-0.003297	-1.61924	0.0259792	0.190508
	3	mice-tumour-7-F9-2-ex2_FS-65V.16193.16193.3.1.dta	3	2036.13	0.0158857	0.0910195	-0.00615	-3.02042	0.000317439	0.216975
	4	mice-tumour-7-F9-3-ex2_FS-65v.16245.16245.3.1.dta	3	2036.13	0.0715664	0.0944801	-0.004977	-2.44433	0.000431207	0.275303
	5	mice-tumour-7-F9-2-ex2_FS-65V.16185.16185.3.1.dta	3	2036.13	0.142755	0.322558	-0.005908	-2.90157	0.0430039	0.80016
16	ADGKISEQSDAK(4)-AMKQVAGTMK(3)	2450.23	null	NP_004037 GeneID:498 ATP5F1A(531)-NP_004037 GeneID:498 ATP5F1A(427)/NP_004037 GeneID:498 ATP5F1A(531)-NP_001001935 GeneID:498 ATP5F1A(377)/NP_004037 GeneID:498 ATP5F1A(531)-NP_001244264 GeneID:498 ATP5F1A(377)/NP_004037 GeneID:498 ATP5F1A(531)-NP_001244263 GeneID:498 ATP5F1A(405)/NP_004037 GeneID:498 ATP5F1A(531)-NP_001001937 GeneID:498 ATP5F1A(427)/NP_001001935 GeneID:498 ATP5F1A(481)-NP_004037 …	Intra-Protein							NP_001244264	GeneID:498	ATP5F1A(481)	NP_001244264	GeneID:498	ATP5F1A(377)
	1	mice-tumour-7-F12-2-ex2_FS-45v.7083.7083.3.0.dta	3	2450.22	1.34818e-08	0.000295201	-0.011254	-4.59305	2.96999e-12	2.93721e-06
	2	mice-tumour-7-F12-1-ex2_FS-45v.7027.7027.3.3.dta	3	2450.21	6.28665e-06	0.000575699	-0.013325	-5.43827	6.64761e-07	6.67417e-06
	3	mice-tumour-7-F12-1-ex2_FS-45v.7055.7055.3.3.dta	3	2450.21	0.000962783	0.0016822	-0.013325	-5.43827	2.77626e-06	0.00138689
	4	mice-tumour-7-F12-1-ex2_FS-45v.7076.7076.3.3.dta	3	2450.21	1.66754e-06	0.00174652	-0.013325	-5.43827	1.96816e-11	7.98012e-07
	5	mice-tumour-7-F13-1-ex2_FS-45V.7173.7173.3.0.dta	3	2450.22	3.87255e-09	0.00200339	-0.008315	-3.39356	1.50392e-14	4.48995e-08
	6	mice-tumour-7-F12-1-ex2_FS-45v.6967.6967.3.0.dta	3	2466.21	5.17912e-07	0.00262562	-0.013012	-5.27609	5.60997e-07	3.97476e-10
	7	mice-tumour-7-F12-3-ex2_FS-45V.6905.6905.3.0.dta	3	2466.22	0.000450176	0.00738846	-0.004434	-1.79789	4.29805e-08	0.00012546
	8	mice-tumour-7-F12-3-ex2_FS-45V.6941.6941.3.0.dta	3	2466.22	4.4533e-05	0.0142682	-0.004434	-1.79789	4.25349e-07	6.28908e-08
	9	mice-tumour-7-F13-1-ex2_FS-45V.7113.7113.3.0.dta	3	2466.22	9.63943e-06	0.0176708	-0.005112	-2.07281	0.00145461	3.16797e-05
	10	mice-tumour-7-F13-2-ex2_FS-45V.7061.7061.3.0.dta	3	2466.21	8.40348e-08	0.0270752	-0.006566	-2.66237	2.0371e-05	3.05882e-07
	11	mice-tumour-7-F13-3-ex2_FS-45V.7064.7064.3.0.dta	3	2466.2	3.21146e-07	0.0350927	-0.024502	-9.93504	1.40592e-06	1.25866e-08
	12	mice-tumour-7-F13-3-ex2_FS-45V.7075.7075.3.0.dta	3	2466.21	5.27309e-05	0.0388508	-0.012564	-5.09443	0.000258322	2.49838e-07
	13	mice-tumour-7-F13-3-ex2_FS-45V.7176.7176.3.0.dta	3	2450.22	8.63944e-09	0.0586769	-0.007915	-3.23031	3.51817e-07	1.0636e-05
	14	mice-tumour-7-F13-3-ex2_FS-45V.7112.7112.3.1.dta	3	2450.22	4.70522e-06	0.0664757	-0.008232	-3.35969	3.21523e-07	2.41339e-06
	15	mice-tumour-7-F12-2-ex2_FS-45v.7009.7009.3.0.dta	3	2466.21	9.77694e-06	0.0856676	-0.009402	-3.81231	3.61429e-07	6.69214e-08
17	ADIKGPEDK(4)-ELKPAR(3)	1822.99	null	NP_005165 GeneID:509 ATP5F1C(83)-NP_005165 GeneID:509 ATP5F1C(64)/NP_005165 GeneID:509 ATP5F1C(83)-NP_001001973 GeneID:509 ATP5F1C(64)/NP_001001973 GeneID:509 ATP5F1C(83)-NP_005165 GeneID:509 ATP5F1C(64)/NP_001001973 GeneID:509 ATP5F1C(83)-NP_001001973 GeneID:509 ATP5F1C(64)/	Intra-Protein							NP_005165	GeneID:509	ATP5F1C(83)	NP_005165	GeneID:509	ATP5F1C(64)
	1	mice-tumour-7-F14-2-ex2_FS-45V.6108.6108.4.2.dta	4	1822.99	4.79175e-05	4.11642e-05	-0.001268	-0.69556	0.00138788	0.00429003
	2	mice-tumour-7-F14-3-ex2_FS-45V.6135.6135.4.2.dta	4	1822.99	0.000955146	0.21783	-0.001927	-1.05705	0.00275237	0.00277506
18	ADKLAEEHSS(3)-LVPLKETIK(5)	2264.24	null	NP_001677 GeneID:506 ATP5F1B(522)-NP_001677 GeneID:506 ATP5F1B(485)/	Intra-Protein							NP_001677	GeneID:506	ATP5F1B(522)	NP_001677	GeneID:506	ATP5F1B(485)
	1	mice-tumour-7-F19-3-ex2_FS-65v.15665.15665.4.0.dta	4	2264.24	0.299878	0.00642662	-0.003108	-1.37265	7.77525e-09	0.216784
	2	mice-tumour-7-F19-2-ex2_FS-65v.15568.15568.4.1.dta	4	2264.24	0.00573262	0.0207362	-0.001715	-0.757429	0.00101664	0.00407774
	3	mice-tumour-7-F19-2-ex2_FS-65v.15663.15663.4.0.dta	4	2264.24	1	0.0300865	-0.002342	-1.03434	2.92496e-06	1
	4	mice-tumour-7-F19-3-ex2_FS-65v.15630.15630.3.0.dta	3	2264.23	0.404865	0.0613769	-0.004957	-2.18926	0.343805	0.297356
	5	mice-tumour-7-F19-3-ex2_FS-65v.15607.15607.4.0.dta	4	2264.24	1	0.120407	-0.00237	-1.04671	0.00162317	1
	6	mice-tumour-7-F19-2-ex2_FS-65v.15633.15633.4.0.dta	4	2264.24	1	0.317468	-0.00183	-0.808219	0.00125051	1
19	ADLIAYLKK(8)-GSLSGLR(1)	1861.08	null	NP_061820 GeneID:54205 CYCS(100)-NP_055182 GeneID:26355 FAM162A(2)/	Inter-Protein							NP_061820	GeneID:54205	CYCS(100)	NP_055182	GeneID:26355	FAM162A(2)
	1	mice-tumour-7-F13-2-ex2_FS-65V.14549.14549.4.0.dta	4	1861.08	0.00027922	0.033054	-0.001447	-0.777506	7.44257e-09	5.89936e-05
	2	mice-tumour-7-F13-3-ex2_FS-65V.14584.14584.4.0.dta	4	1861.08	1.01927e-06	0.0938319	-2e-05	-0.010746	1.90019e-09	9.92916e-08
20	ADLIAYLKK(8)-TLGDKR(5)	1861.08	null	NP_061820 GeneID:54205 CYCS(100)-NP_733792 GeneID:84340 GFM2(538)/NP_061820 GeneID:54205 CYCS(100)-NP_115756 GeneID:84340 GFM2(585)/NP_061820 GeneID:54205 CYCS(100)-NP_001268231 GeneID:84340 GFM2(617)/	Inter-Protein							NP_061820	GeneID:54205	CYCS(100)	NP_733792	GeneID:84340	GFM2(538)
	1	mice-tumour-7-F13-3-ex2_FS-65V.14527.14527.4.0.dta	4	1861.08	1.30864e-09	0.0215033	-0.00012	-0.064479	7.3252e-15	2.78429e-08
	2	mice-tumour-7-F13-1-ex2_FS-65V.14620.14620.4.0.dta	4	1861.08	2.3856e-05	0.118978	-0.000717	-0.38526	1.62972e-10	1.23999e-05
	3	mice-tumour-7-F13-3-ex2_FS-65V.14507.14507.4.0.dta	4	1861.08	7.37643e-07	0.156555	-0.00012	-0.064479	3.28577e-13	5.64568e-06
	4	mice-tumour-7-F13-1-ex2_FS-65V.14580.14580.4.0.dta	4	1861.08	7.81355e-05	0.329431	-0.000717	-0.38526	8.47086e-08	0.000552626
	5	mice-tumour-7-F13-2-ex2_FS-65V.14470.14470.4.0.dta	4	1861.08	9.91801e-06	0.405869	-0.001463	-0.786103	6.16812e-11	6.23124e-05
21	ADQLYKQK(6)-KCDLHR(1)	1959.01	Carbamidomethyl[C](13)	NP_005381 GeneID:5161 PDHA2(81)-NP_001166926 GeneID:5160 PDHA1(40)/NP_005381 GeneID:5161 PDHA2(81)-NP_001166927 GeneID:5160 PDHA1(40)/NP_005381 GeneID:5161 PDHA2(81)-NP_001166925 GeneID:5160 PDHA1(78)/NP_005381 GeneID:5161 PDHA2(81)-NP_000275 GeneID:5160 PDHA1(40)/NP_001166926 GeneID:5160 PDHA1(83)-NP_001166926 GeneID:5160 PDHA1(40)/NP_001166926 GeneID:5160 PDHA1(83)-NP_001166927 GeneID:5160 PDHA…	Intra-Protein							NP_005381	GeneID:5161	PDHA2(81)	NP_001166926	GeneID:5160	PDHA1(40)
												NP_001166926	GeneID:5160	PDHA1(83)	NP_001166926	GeneID:5160	PDHA1(40)
	1	mice-tumour-7-F8-2-ex2_FS65V.23355.23355.3.2.dta	3	1959	1	0.364109	-0.015913	-8.12297	1	1
22	ADVVPKTAENFR(6)-ALCTGEKGFGYK(7)	2814.41	Carbamidomethyl[C](18)	NP_005720 GeneID:10105 PPIF(73)-NP_005720 GeneID:10105 PPIF(86)/	Intra-Protein							NP_005720	GeneID:10105	PPIF(73)	NP_005720	GeneID:10105	PPIF(86)
	1	mice-tumour-7-F13-1-ex2_FS-45V.16083.16083.3.0.dta	3	2814.4	0.00193833	0.0320939	-0.014494	-5.14992	4.48944e-07	3.52188e-07
	2	mice-tumour-7-F13-1-ex2_FS-45V.16111.16111.4.0.dta	4	2814.41	0.0001179	0.0560288	-0.0048	-1.70551	5.64804e-05	1.33104e-06
	3	mice-tumour-7-F13-2-ex2_FS-45V.16102.16102.4.1.dta	4	2814.4	0.000552655	0.147498	-0.008744	-3.10686	0.000462656	1.59289e-05
	4	mice-tumour-7-F13-3-ex2_FS-45V.16170.16170.3.3.dta	3	2814.4	0.0165753	0.466007	-0.01404	-4.98861	6.81258e-10	1.72753e-07
23	AEDMETKIK(7)-CQKAMTAK(3)	2181.06	Acetyl[ProteinN-term](0);Carbamidomethyl[C](13)	NP_001854 GeneID:1340 COX6B1(8)-NP_001854 GeneID:1340 COX6B1(42)/	Intra-Protein							NP_001854	GeneID:1340	COX6B1(8)	NP_001854	GeneID:1340	COX6B1(42)
	1	mice-tumour-7-F13-3-ex2_FS-65V.14071.14071.3.0.dta	3	2181.06	5.97938e-07	3.0096e-06	-0.003028	-1.38832	2.3339e-06	1.9522e-08
	2	mice-tumour-7-F13-2-ex2_FS-65V.14029.14029.3.0.dta	3	2181.06	1.22882e-09	0.000116994	-0.004736	-2.17142	9.79396e-07	3.93256e-13
	3	mice-tumour-7-F13-1-ex2_FS-65V.14215.14215.3.0.dta	3	2181.06	0.000226818	0.000801215	-0.00203	-0.93074	0.00310719	2.78112e-05
	4	mice-tumour-7-F12-1-ex2_FS-65v.14358.14358.3.1.dta	3	2181.05	0.0227801	0.00742279	-0.006157	-2.82294	0.0236248	7.5691e-05
24	AEMKTSMESLIHHFK(4)-VDDAKVSPPK(5)	2981.51	null	NP_001159631 GeneID:4720 NDUFS2(372)-NP_001159631 GeneID:4720 NDUFS2(362)/NP_001159631 GeneID:4720 NDUFS2(372)-NP_004541 GeneID:4720 NDUFS2(362)/NP_004541 GeneID:4720 NDUFS2(372)-NP_001159631 GeneID:4720 NDUFS2(362)/NP_004541 GeneID:4720 NDUFS2(372)-NP_004541 GeneID:4720 NDUFS2(362)/	Intra-Protein							NP_004541	GeneID:4720	NDUFS2(372)	NP_004541	GeneID:4720	NDUFS2(362)
	1	mice-tumour-7-F18-3-ex2_FS-45v.18566.18566.5.0.dta	5	2981.51	0.000873612	3.48454e-11	0.000812	0.272345	6.65055e-05	0.00288212
25	AEQINQAAGEASAVLAKAK(17)-AKAEAIR(2)	2765.52	null	NP_038470 GeneID:30968 STOML2(250)-NP_038470 GeneID:30968 STOML2(254)/NP_038470 GeneID:30968 STOML2(250)-NP_001273962 GeneID:30968 STOML2(208)/NP_038470 GeneID:30968 STOML2(250)-NP_001273960 GeneID:30968 STOML2(209)/NP_038470 GeneID:30968 STOML2(250)-NP_001273961 GeneID:30968 STOML2(203)/NP_001273962 GeneID:30968 STOML2(204)-NP_038470 GeneID:30968 STOML2(254)/NP_001273962 GeneID:30968 STOML2(204)…	Intra-Protein							NP_038470	GeneID:30968	STOML2(250)	NP_038470	GeneID:30968	STOML2(254)
	1	mice-tumour-7-F9-1-ex2_FS-45v.17745.17745.4.0.dta	4	2765.51	3.56495e-09	0.00046263	-0.006714	-2.42776	8.95037e-14	1.0087e-10
	2	mice-tumour-7-F9-2-ex2_FS-45V.17403.17403.4.0.dta	4	2765.51	8.3089e-07	0.00136219	-0.004	-1.44639	7.53115e-23	4.93018e-09
	3	mice-tumour-7-F10-1-ex2_FS-45v.17677.17677.4.0.dta	4	2765.51	2.83569e-11	0.00605204	-0.01025	-3.70636	1.94175e-14	8.52716e-09
	4	mice-tumour-7-F10-1-ex2_FS-45v.17665.17665.4.0.dta	4	2765.51	8.0555e-13	0.00941902	-0.010371	-3.75012	2.65456e-19	3.94324e-14
	5	mice-tumour-7-F9-3-ex2_FS-45v.17657.17657.4.0.dta	4	2765.51	8.50533e-12	0.0129867	-0.004292	-1.55197	7.6417e-15	5.51178e-15
	6	mice-tumour-7-F10-1-ex2_FS-45v.17724.17724.4.0.dta	4	2765.51	0.000474815	0.067089	-0.010234	-3.70058	7.18578e-13	0.000206586
	7	mice-tumour-7-F9-3-ex2_FS-45v.17703.17703.5.1.dta	5	2765.51	2.14997e-06	0.186138	-0.003562	-1.28801	1.64481e-06	4.62415e-07
26	AEQPDGLILGMGGQTALNCGVELFKR(25)-GVLKEYGVK(4)	3904.03	Carbamidomethyl[C](19)	NP_001116105 GeneID:1373 CPS1(528)-NP_001116105 GeneID:1373 CPS1(533)/NP_001116105 GeneID:1373 CPS1(528)-NP_001866 GeneID:1373 CPS1(527)/NP_001116105 GeneID:1373 CPS1(528)-NP_001116106 GeneID:1373 CPS1(76)/NP_001866 GeneID:1373 CPS1(522)-NP_001116105 GeneID:1373 CPS1(533)/NP_001866 GeneID:1373 CPS1(522)-NP_001866 GeneID:1373 CPS1(527)/NP_001866 GeneID:1373 CPS1(522)-NP_001116106 GeneID:1373 CPS1(…	Intra-Protein							NP_001866	GeneID:1373	CPS1(522)	NP_001866	GeneID:1373	CPS1(527)
	1	mice-tumour-7-F18-1-ex2_FS-45v.29449.29449.6.2.dta	6	3904.04	3.25046e-05	0.176819	0.001996	0.511266	4.2366e-05	9.53133e-06
27	AEWQVYKEEISR(7)-KPVSSYLR(1)	2624.37	null	NP_003192 GeneID:7019 TFAM(111)-NP_003192 GeneID:7019 TFAM(52)/NP_003192 GeneID:7019 TFAM(111)-NP_001257711 GeneID:7019 TFAM(52)/NP_001257711 GeneID:7019 TFAM(111)-NP_003192 GeneID:7019 TFAM(52)/NP_001257711 GeneID:7019 TFAM(111)-NP_001257711 GeneID:7019 TFAM(52)/	Intra-Protein							NP_003192	GeneID:7019	TFAM(111)	NP_003192	GeneID:7019	TFAM(52)
	1	mice-tumour-7-F13-3-ex2_FS-45V.21128.21128.4.0.dta	4	2624.35	2.3577e-05	0.157294	-0.024833	-9.46246	0.000390603	0.000656162
28	AFDQGADAIYDHINEGKLWK(17)-HKYENK(2)	3246.59	null	NP_037519 GeneID:29796 UQCR10(51)-NP_037519 GeneID:29796 UQCR10(59)/	Intra-Protein							NP_037519	GeneID:29796	UQCR10(51)	NP_037519	GeneID:29796	UQCR10(59)
	1	mice-tumour-7-F20-2-ex2_FS-65v.18626.18626.4.0.dta	4	3246.57	1	0.0351082	-0.016629	-5.122	1	1
	2	mice-tumour-7-F20-1-ex2_FS-65v.18752.18752.4.1.dta	4	3246.58	0.00992321	0.237512	-0.005679	-1.74922	1	0.00326045
	3	mice-tumour-7-F20-3-ex2_FS-65v.18679.18679.4.0.dta	4	3246.57	9.43594e-06	0.25436	-0.017651	-5.43679	1	3.98679e-06
	4	mice-tumour-7-F20-2-ex2_FS-65v.18655.18655.4.1.dta	4	3246.56	0.00527126	0.272689	-0.023013	-7.08837	1	0.000913888
29	AFDSAVAKALEHHR(8)-KIEEVR(1)	2462.31	null	NP_001093640 GeneID:10989 IMMT(440)-NP_001093640 GeneID:10989 IMMT(456)/NP_001093640 GeneID:10989 IMMT(440)-NP_006830 GeneID:10989 IMMT(467)/NP_001093640 GeneID:10989 IMMT(440)-NP_001093639 GeneID:10989 IMMT(466)/NP_006830 GeneID:10989 IMMT(451)-NP_001093640 GeneID:10989 IMMT(456)/NP_006830 GeneID:10989 IMMT(451)-NP_006830 GeneID:10989 IMMT(467)/NP_006830 GeneID:10989 IMMT(451)-NP_001093639 GeneI…	Intra-Protein							NP_006830	GeneID:10989	IMMT(451)	NP_006830	GeneID:10989	IMMT(467)
	1	mice-tumour-7-F17-1-ex2_FS-45v.11713.11713.5.0.dta	5	2462.32	0.000178852	0.00238707	0.00221	0.897529	8.80355e-09	0.000711929
	2	mice-tumour-7-F17-3-ex2_FS-45v.11771.11771.5.0.dta	5	2462.31	5.42873e-05	0.00269199	-0.007795	-3.16572	7.18107e-08	0.000115168
	3	mice-tumour-7-F17-3-ex2_FS-45v.11816.11816.6.0.dta	6	2462.32	0.00126406	0.00350718	0.001421	0.577099	0.000422376	0.00424939
	4	mice-tumour-7-F17-1-ex2_FS-45v.11727.11727.6.1.dta	6	2462.31	0.000136903	0.0125879	-0.004067	-1.6517	0.000565955	0.000387873
	5	mice-tumour-7-F17-1-ex2_FS-45v.11748.11748.5.0.dta	5	2462.32	0.000103227	0.0187453	0.00221	0.897529	3.94757e-06	0.000473497
30	AFDSAVAKALEHHR(8)-QKLEEK(2)	2463.3	null	NP_001093640 GeneID:10989 IMMT(440)-NP_001093640 GeneID:10989 IMMT(427)/NP_001093640 GeneID:10989 IMMT(440)-NP_006830 GeneID:10989 IMMT(438)/NP_001093640 GeneID:10989 IMMT(440)-NP_001093639 GeneID:10989 IMMT(437)/NP_006830 GeneID:10989 IMMT(451)-NP_001093640 GeneID:10989 IMMT(427)/NP_006830 GeneID:10989 IMMT(451)-NP_006830 GeneID:10989 IMMT(438)/NP_006830 GeneID:10989 IMMT(451)-NP_001093639 GeneI…	Intra-Protein							NP_006830	GeneID:10989	IMMT(451)	NP_006830	GeneID:10989	IMMT(438)
	1	mice-tumour-7-F16-2-ex2_FS-45v.10510.10510.5.2.dta	5	2463.29	0.156006	0.136044	-0.005311	-2.15605	0.041576	0.11982
31	AFFKGAWSNVLR(4)-LIAEKVQAER(5)	2689.48	null	NP_001142 GeneID:291 SLC25A4(272)-NP_942133 GeneID:31 ACACA(620)/NP_001142 GeneID:291 SLC25A4(272)-NP_942135 GeneID:31 ACACA(542)/NP_001142 GeneID:291 SLC25A4(272)-NP_942134 GeneID:31 ACACA(562)/NP_001142 GeneID:291 SLC25A4(272)-NP_942131 GeneID:31 ACACA(657)/NP_001142 GeneID:291 SLC25A4(272)-NP_942136 GeneID:31 ACACA(620)/NP_001627 GeneID:293 SLC25A6(272)-NP_942133 GeneID:31 ACACA(620)/NP_001627…	Inter-Protein							NP_001142	GeneID:291	SLC25A4(272)	NP_942134	GeneID:31	ACACA(562)
												NP_001627	GeneID:293	SLC25A6(272)	NP_942134	GeneID:31	ACACA(562)
												NP_001143	GeneID:292	SLC25A5(272)	NP_942134	GeneID:31	ACACA(562)
	1	mice-tumour-7-F18-1-ex2_FS-65v.29246.29246.3.0.dta	3	2689.48	0.985622	0.4024	0.001868	0.694557	0.209202	0.00504364
32	AFGGQSLKFGK(8)-TEDGKIYQR(5)	2386.24	null	NP_004159 GeneID:6389 SDHA(179)-NP_004159 GeneID:6389 SDHA(167)/	Intra-Protein							NP_004159	GeneID:6389	SDHA(179)	NP_004159	GeneID:6389	SDHA(167)
	1	mice-tumour-7-F11-2-ex2_FS-45v.14300.14300.3.1.dta	3	2386.24	9.51339e-06	0.000269956	-0.004219	-1.76805	1.73163e-07	6.54895e-08
	2	mice-tumour-7-F12-3-ex2_FS-45V.13940.13940.3.0.dta	3	2386.24	2.30254e-16	0.0003803	-0.001729	-0.724571	2.6017e-17	2.40779e-11
	3	mice-tumour-7-F12-1-ex2_FS-45v.14180.14180.3.0.dta	3	2386.24	2.02297e-13	0.00229288	-0.004996	-2.09367	7.57455e-11	3.25617e-11
	4	mice-tumour-7-F11-3-ex2_FS-45v.14231.14231.3.1.dta	3	2386.24	5.23988e-10	0.00836317	-0.004639	-1.94406	0.000146516	7.9841e-10
	5	mice-tumour-7-F12-2-ex2_FS-45v.14262.14262.3.0.dta	3	2386.23	3.94051e-11	0.264903	-0.005519	-2.31284	1.15094e-06	0.00052412
33	AFNLYNQMKK(9)-QMLKEER(4)	2359.18	Oxidation[M](8);Oxidation[M](15)	NP_001185808 GeneID:100526740 ATP5MF-PTCD1(249)-NP_001185808 GeneID:100526740 ATP5MF-PTCD1(214)/NP_001185808 GeneID:100526740 ATP5MF-PTCD1(249)-NP_056360 GeneID:26024 PTCD1(165)/NP_056360 GeneID:26024 PTCD1(200)-NP_001185808 GeneID:100526740 ATP5MF-PTCD1(214)/NP_056360 GeneID:26024 PTCD1(200)-NP_056360 GeneID:26024 PTCD1(165)/	Intra-Protein							NP_001185808	GeneID:100526740	ATP5MF-PTCD1(249)	NP_001185808	GeneID:100526740	ATP5MF-PTCD1(214)
												NP_001185808	GeneID:100526740	ATP5MF-PTCD1(249)	NP_056360	GeneID:26024	PTCD1(165)
												NP_001185808	GeneID:100526740	ATP5MF-PTCD1(214)	NP_056360	GeneID:26024	PTCD1(200)
												NP_056360	GeneID:26024	PTCD1(200)	NP_056360	GeneID:26024	PTCD1(165)
	1	mice-tumour-7-F9-1-ex2_FS-65v.22561.22561.3.2.dta	3	2359.15	0.00545299	0.272462	-0.024451	-10.3642	0.000896375	0.000929693
34	AFQYVETHGEVCPANWTPDSPTIKPSPAASK(24)-EYFQKVNQ(5)	4578.19	Carbamidomethyl[C](12)	NP_054817 GeneID:10935 PRDX3(223)-NP_054817 GeneID:10935 PRDX3(235)/NP_054817 GeneID:10935 PRDX3(223)-NP_006784 GeneID:10935 PRDX3(253)/NP_006784 GeneID:10935 PRDX3(241)-NP_054817 GeneID:10935 PRDX3(235)/NP_006784 GeneID:10935 PRDX3(241)-NP_006784 GeneID:10935 PRDX3(253)/	Intra-Protein							NP_006784	GeneID:10935	PRDX3(241)	NP_006784	GeneID:10935	PRDX3(253)
	1	mice-tumour-7-F19-3-ex2_FS-45v.21384.21384.4.0.dta	4	4578.18	5.11889e-07	0.0026915	-0.007089	-1.54843	1	2.57502e-06
	2	mice-tumour-7-F19-1-ex2_FS-45v.21433.21433.4.0.dta	4	4578.18	0.01491	0.00632921	-0.007294	-1.5932	1	0.000283109
	3	mice-tumour-7-F19-2-ex2_FS-45v.21425.21425.4.0.dta	4	4578.18	5.27688e-07	0.0194168	-0.007907	-1.7271	1	1.38849e-08
35	AFVDFLSDEIKEER(11)-HKTLPK(2)	2558.35	null	NP_001203 GeneID:708 C1QBP(91)-NP_001203 GeneID:708 C1QBP(100)/	Intra-Protein							NP_001203	GeneID:708	C1QBP(91)	NP_001203	GeneID:708	C1QBP(100)
	1	mice-tumour-7-F19-3-ex2_FS-45v.21974.21974.5.0.dta	5	2558.35	5.13211e-05	9.14214e-07	-0.000211	-0.082475	8.10717e-10	3.50282e-06
	2	mice-tumour-7-F20-2-ex2_FS-45v.21813.21813.5.0.dta	5	2558.35	4.23797e-07	3.23817e-06	-0.000174	-0.068013	8.80703e-09	2.69273e-07
	3	mice-tumour-7-F20-3-ex2_FS-45v.21841.21841.5.0.dta	5	2558.35	3.20535e-09	6.41029e-06	0.000777	0.303711	9.13427e-11	4.31065e-09
	4	mice-tumour-7-F19-1-ex2_FS-45v.22079.22079.5.0.dta	5	2558.35	0.00282596	5.23571e-05	0.000726	0.283777	1.33083e-06	6.26505e-05
	5	mice-tumour-7-F19-3-ex2_FS-45v.21957.21957.4.0.dta	4	2558.35	0.242268	0.0019737	-0.001091	-0.426447	0.000840014	0.180858
	6	mice-tumour-7-F19-2-ex2_FS-45v.22027.22027.5.0.dta	5	2558.35	0.000500739	0.00227107	0.001293	0.505404	6.45663e-09	2.09832e-05
	7	mice-tumour-7-F20-1-ex2_FS-45v.21945.21945.5.0.dta	5	2558.35	0.000115866	0.0148381	-0.000388	-0.15166	2.9586e-12	2.25495e-05
	8	mice-tumour-7-F19-2-ex2_FS-45v.21996.21996.4.1.dta	4	2558.35	0.837043	0.0261423	-0.000518	-0.202474	0.117418	0.655018
	9	mice-tumour-7-F19-3-ex2_FS-45v.22089.22089.4.1.dta	4	2558.35	0.71761	0.0465207	-0.001274	-0.497977	0.00457815	0.658905
	10	mice-tumour-7-F20-1-ex2_FS-45v.22064.22064.5.0.dta	5	2558.35	0.0133942	0.177567	-0.000789	-0.308402	6.84918e-06	0.0388748
	11	mice-tumour-7-F20-3-ex2_FS-45v.21833.21833.3.0.dta	3	2558.34	0.000475934	0.437897	-0.005459	-2.1338	3.77875e-06	0.000518329
36	AFYKGVAPLWMR(4)-DAAPKMYK(5)	2499.29	null	NP_998776 GeneID:5250 SLC25A3(217)-NP_998776 GeneID:5250 SLC25A3(205)/NP_998776 GeneID:5250 SLC25A3(217)-NP_002626 GeneID:5250 SLC25A3(205)/NP_998776 GeneID:5250 SLC25A3(217)-NP_005879 GeneID:5250 SLC25A3(206)/NP_002626 GeneID:5250 SLC25A3(217)-NP_998776 GeneID:5250 SLC25A3(205)/NP_002626 GeneID:5250 SLC25A3(217)-NP_002626 GeneID:5250 SLC25A3(205)/NP_002626 GeneID:5250 SLC25A3(217)-NP_005879 Gene…	Intra-Protein							NP_005879	GeneID:5250	SLC25A3(218)	NP_005879	GeneID:5250	SLC25A3(206)
	1	mice-tumour-7-F14-1-ex2_FS-45V.24175.24175.4.2.dta	4	2499.29	0.00527449	3.21719e-06	-0.005929	-2.37227	1.93706e-08	0.00186986
	2	mice-tumour-7-F14-2-ex2_FS-45V.24064.24064.4.2.dta	4	2499.28	0.000519152	0.00035468	-0.010779	-4.31282	3.36574e-08	0.00152823
	3	mice-tumour-7-F14-2-ex2_FS-65V.25467.25467.3.0.dta	3	2499.28	8.81913e-07	0.000839503	-0.007977	-3.1917	7.35986e-07	0.000103044
	4	mice-tumour-7-F14-3-ex2_FS-65V.25456.25456.3.0.dta	3	2499.29	2.8646e-08	0.00322195	-0.007047	-2.8196	1.58348e-11	9.49771e-06
	5	mice-tumour-7-F14-2-ex2_FS-65V.25487.25487.3.0.dta	3	2499.28	2.72239e-08	0.00411993	-0.007977	-3.1917	4.85216e-08	0.000102838
	6	mice-tumour-7-F14-1-ex2_FS-65V.25545.25545.3.1.dta	3	2499.28	7.40244e-06	0.129835	-0.009244	-3.69865	1.06921e-06	0.00155939
37	AGAEVKSR(6)-KIGDFR(1)	1689.93	null	NP_665811 GeneID:9131 AIFM1(274)-NP_665811 GeneID:9131 AIFM1(282)/NP_665811 GeneID:9131 AIFM1(274)-NP_004199 GeneID:9131 AIFM1(286)/NP_665811 GeneID:9131 AIFM1(274)-NP_001124319 GeneID:9131 AIFM1(286)/NP_004199 GeneID:9131 AIFM1(278)-NP_665811 GeneID:9131 AIFM1(282)/NP_004199 GeneID:9131 AIFM1(278)-NP_004199 GeneID:9131 AIFM1(286)/NP_004199 GeneID:9131 AIFM1(278)-NP_001124319 GeneID:9131 AIFM1(28…	Intra-Protein							NP_004199	GeneID:9131	AIFM1(278)	NP_004199	GeneID:9131	AIFM1(286)
	1	mice-tumour-7-F18-3-ex2_FS-45v.6604.6604.4.0.dta	4	1689.93	0.402167	7.73382e-06	-0.000841	-0.497654	0.925014	0.00512616
	2	mice-tumour-7-F19-1-ex2_FS-65v.6959.6959.3.0.dta	3	1689.93	0.000222221	0.00140366	-0.001939	-1.14739	0.00307881	4.33825e-07
	3	mice-tumour-7-F18-2-ex2_FS-45v.6625.6625.4.0.dta	4	1689.93	0.203897	0.00567446	-0.000457	-0.270426	0.350703	0.00131
	4	mice-tumour-7-F19-3-ex2_FS-45v.6787.6787.4.0.dta	4	1689.92	0.00997307	0.198861	-0.009652	-5.71148	0.0164315	0.00139968
	5	mice-tumour-7-F19-2-ex2_FS-45v.6823.6823.4.0.dta	4	1689.92	0.137491	0.278921	-0.009638	-5.7032	0.152367	0.00454653
38	AGMKDVVLLEK(4)-ELGLEKDDK(6)	2402.27	Oxidation[M](3)	NP_037523 GeneID:29958 DMGDH(74)-NP_004784 GeneID:9361 LONP1(411)/NP_037523 GeneID:29958 DMGDH(74)-NP_001263409 GeneID:9361 LONP1(215)/NP_037523 GeneID:29958 DMGDH(74)-NP_001263408 GeneID:9361 LONP1(347)/	Inter-Protein							NP_037523	GeneID:29958	DMGDH(74)	NP_004784	GeneID:9361	LONP1(411)
	1	mice-tumour-7-F11-1-ex2_FS-65v.16665.16665.3.0.dta	3	2402.29	0.196212	0.472726	0.016943	7.0529	0.0946179	0.0108823
39	AGPESDAQYQFTGIK(1)-KYFNSYTLTGR(1)	3098.51	null	NP_001193356 GeneID:84833 ATP5MD(2)-NP_001193356 GeneID:84833 ATP5MD(17)/NP_001193356 GeneID:84833 ATP5MD(2)-NP_001193355 GeneID:84833 ATP5MD(17)/NP_001193356 GeneID:84833 ATP5MD(2)-NP_116136 GeneID:84833 ATP5MD(17)/NP_001193355 GeneID:84833 ATP5MD(2)-NP_001193356 GeneID:84833 ATP5MD(17)/NP_001193355 GeneID:84833 ATP5MD(2)-NP_001193355 GeneID:84833 ATP5MD(17)/NP_001193355 GeneID:84833 ATP5MD(2)-N…	Intra-Protein							NP_116136	GeneID:84833	ATP5MD(2)	NP_116136	GeneID:84833	ATP5MD(17)
	1	mice-tumour-7-F14-2-ex2_FS-45V.22902.22902.3.0.dta	3	3098.51	1.68454e-06	8.49546e-18	0.002038	0.657735	4.01247e-11	5.81257e-10
	2	mice-tumour-7-F14-1-ex2_FS-45V.23019.23019.3.0.dta	3	3098.5	6.29016e-07	1.45837e-12	-0.006885	-2.22203	3.07533e-12	5.37358e-07
	3	mice-tumour-7-F14-3-ex2_FS-45V.22972.22972.3.0.dta	3	3098.52	1.79841e-07	0.00013462	0.006298	2.03259	1.00289e-11	5.25894e-12
	4	mice-tumour-7-F14-3-ex2_FS-45V.22936.22936.3.0.dta	3	3098.52	1.62803e-06	0.000693566	0.006298	2.03259	4.84486e-09	2.42469e-12
40	AGPESDAQYQFTGIKK(15)-KTPAVK(1)	2520.33	null	NP_001193356 GeneID:84833 ATP5MD(16)-NP_001193356 GeneID:84833 ATP5MD(51)/NP_001193356 GeneID:84833 ATP5MD(16)-NP_001193355 GeneID:84833 ATP5MD(51)/NP_001193356 GeneID:84833 ATP5MD(16)-NP_116136 GeneID:84833 ATP5MD(51)/NP_001193355 GeneID:84833 ATP5MD(16)-NP_001193356 GeneID:84833 ATP5MD(51)/NP_001193355 GeneID:84833 ATP5MD(16)-NP_001193355 GeneID:84833 ATP5MD(51)/NP_001193355 GeneID:84833 ATP5MD…	Intra-Protein							NP_116136	GeneID:84833	ATP5MD(16)	NP_116136	GeneID:84833	ATP5MD(51)
	1	mice-tumour-7-F11-1-ex2_FS-65v.13360.13360.4.0.dta	4	2520.33	4.95972e-06	0.000399571	-0.00588	-2.33302	0.000444893	3.18447e-05
	2	mice-tumour-7-F11-3-ex2_FS-65v.13127.13127.4.0.dta	4	2520.33	4.0406e-07	0.00253099	-0.004954	-1.96561	0.000568588	5.39541e-05
	3	mice-tumour-7-F11-2-ex2_FS-65v.13260.13260.4.0.dta	4	2520.33	2.342e-05	0.0192316	-0.004823	-1.91363	0.000222698	6.72013e-06
41	AHESVVKSEDFSLPAYMDR(7)-FKESFAEMNR(2)	3576.68	null	NP_001852 GeneID:1327 COX4I1(29)-NP_001852 GeneID:1327 COX4I1(87)/	Intra-Protein							NP_001852	GeneID:1327	COX4I1(29)	NP_001852	GeneID:1327	COX4I1(87)
	1	mice-tumour-7-F20-2-ex2_FS-65v.22525.22525.4.0.dta	4	3576.67	1	0.056463	-0.006788	-1.89785	1	1
42	AHESVVKSEDFSLPAYMDR(7)-HLSASQKALK(7)	3400.72	null	NP_001852 GeneID:1327 COX4I1(29)-NP_001852 GeneID:1327 COX4I1(60)/	Intra-Protein							NP_001852	GeneID:1327	COX4I1(29)	NP_001852	GeneID:1327	COX4I1(60)
	1	mice-tumour-7-F16-3-ex2_FS-65v.17320.17320.5.0.dta	5	3400.72	0.00538425	0.00415562	-0.001554	-0.456962	5.68326e-09	4.7367e-05
	2	mice-tumour-7-F16-2-ex2_FS-65v.17423.17423.5.0.dta	5	3400.71	1	0.0102658	-0.006639	-1.95223	0.000209288	1
	3	mice-tumour-7-F16-3-ex2_FS-65v.17293.17293.5.0.dta	5	3400.72	0.767387	0.102591	-0.001554	-0.456962	3.68984e-05	0.989839
43	AHFTIWDKLLER(8)-KMVTEDQSK(1)	2731.41	null	NP_059142 GeneID:54148 MRPL39(315)-NP_059142 GeneID:54148 MRPL39(322)/NP_542984 GeneID:54148 MRPL39(315)-NP_059142 GeneID:54148 MRPL39(322)/	Intra-Protein							NP_059142	GeneID:54148	MRPL39(315)	NP_059142	GeneID:54148	MRPL39(322)
	1	mice-tumour-7-F19-3-ex2_FS-65v.24103.24103.4.0.dta	4	2731.4	1.29702e-05	5.23833e-05	-0.011727	-4.29338	0.000244409	2.96302e-09
	2	mice-tumour-7-F19-2-ex2_FS-65v.24130.24130.4.1.dta	4	2731.4	1.29383e-05	5.92189e-05	-0.008033	-2.94097	6.13153e-12	5.52639e-08
	3	mice-tumour-7-F19-1-ex2_FS-65v.24214.24214.4.2.dta	4	2731.4	0.00031328	6.15364e-05	-0.00736	-2.69458	1.61515e-05	0.000174413
	4	mice-tumour-7-F19-3-ex2_FS-65v.24135.24135.4.0.dta	4	2731.4	9.16437e-08	0.000127576	-0.011004	-4.02869	2.6118e-06	3.11696e-08
	5	mice-tumour-7-F19-1-ex2_FS-65v.24163.24163.4.1.dta	4	2731.4	6.53164e-07	0.00124746	-0.008969	-3.28365	0.00613578	2.81804e-06
	6	mice-tumour-7-F19-3-ex2_FS-65v.24188.24188.4.0.dta	4	2731.4	0.000218271	0.00159057	-0.012288	-4.49877	0.00343106	8.34184e-06
44	AHLDAIR(1)-KDTQTK(1)	1652.9	null	NP_001273049 GeneID:60492 CCDC90B(2)-NP_001273049 GeneID:60492 CCDC90B(83)/NP_001273049 GeneID:60492 CCDC90B(2)-NP_001273045 GeneID:60492 CCDC90B(189)/NP_001273049 GeneID:60492 CCDC90B(2)-NP_068597 GeneID:60492 CCDC90B(198)/NP_001273049 GeneID:60492 CCDC90B(2)-NP_001273048 GeneID:60492 CCDC90B(100)/NP_001273049 GeneID:60492 CCDC90B(2)-NP_001273047 GeneID:60492 CCDC90B(100)/NP_001273049 GeneID:604…	Intra-Protein							NP_001273045	GeneID:60492	CCDC90B(108)	NP_001273045	GeneID:60492	CCDC90B(189)
	1	mice-tumour-7-F11-2-ex2_FS-65v.24708.24708.3.0.dta	3	1652.9	1	0.0264867	0.00049	0.296449	1.88058e-06	1
	2	mice-tumour-7-F11-3-ex2_FS-65v.24525.24525.3.0.dta	3	1652.9	1	0.283484	0.001523	0.921413	1.47182e-05	1
45	AIAKIR(4)-ALQLGR(1)	1465.92	null	NP_783859 GeneID:114971 PTPMT1(164)-NP_000088 GeneID:1371 CPOX(2)/	Inter-Protein							NP_783859	GeneID:114971	PTPMT1(164)	NP_000088	GeneID:1371	CPOX(2)
	1	mice-tumour-7-F19-3-ex2_FS-65v.26216.26216.3.0.dta	3	1465.92	0.476047	0.479021	-0.000653	-0.445454	0.432949	1
46	AIASSLKSWNETLTSR(7)-KFNALK(1)	2621.43	null	NP_006347 GeneID:10476 ATP5PD(32)-NP_006347 GeneID:10476 ATP5PD(73)/NP_001003785 GeneID:10476 ATP5PD(32)-NP_006347 GeneID:10476 ATP5PD(73)/	Intra-Protein							NP_006347	GeneID:10476	ATP5PD(32)	NP_006347	GeneID:10476	ATP5PD(73)
	1	mice-tumour-7-F12-3-ex2_FS-45V.20758.20758.4.1.dta	4	2621.43	0.0517229	0.231182	-0.001566	-0.597384	0.00214007	0.080737
47	AICSSIDKLDK(8)-KGLAPEVADR(1)	2442.29	Carbamidomethyl[C](3)	NP_001265661 GeneID:23438 HARS2(97)-NP_001265661 GeneID:23438 HARS2(114)/NP_001265661 GeneID:23438 HARS2(97)-NP_001265660 GeneID:23438 HARS2(233)/NP_001265661 GeneID:23438 HARS2(97)-NP_036340 GeneID:23438 HARS2(258)/NP_001265660 GeneID:23438 HARS2(216)-NP_001265661 GeneID:23438 HARS2(114)/NP_001265660 GeneID:23438 HARS2(216)-NP_001265660 GeneID:23438 HARS2(233)/NP_001265660 GeneID:23438 HARS2(216…	Intra-Protein							NP_036340	GeneID:23438	HARS2(241)	NP_036340	GeneID:23438	HARS2(258)
	1	mice-tumour-7-F17-2-ex2_FS-65v.16074.16074.4.0.dta	4	2442.3	0.00373464	0.00455502	0.007016	2.87271	0.00934898	2.68971e-08
	2	mice-tumour-7-F17-1-ex2_FS-65v.16007.16007.4.0.dta	4	2442.3	0.00797712	0.270833	0.006547	2.68068	0.0161748	1.60659e-09
48	AIDDNMSLDEIEKLTYIDK(13)-KELSEPSSTR(1)	3496.72	null	NP_001116105 GeneID:1373 CPS1(875)-NP_001116105 GeneID:1373 CPS1(847)/NP_001116105 GeneID:1373 CPS1(875)-NP_001866 GeneID:1373 CPS1(841)/NP_001116105 GeneID:1373 CPS1(875)-NP_001116106 GeneID:1373 CPS1(390)/NP_001866 GeneID:1373 CPS1(869)-NP_001116105 GeneID:1373 CPS1(847)/NP_001866 GeneID:1373 CPS1(869)-NP_001866 GeneID:1373 CPS1(841)/NP_001866 GeneID:1373 CPS1(869)-NP_001116106 GeneID:1373 CPS1…	Intra-Protein							NP_001866	GeneID:1373	CPS1(869)	NP_001866	GeneID:1373	CPS1(841)
	1	mice-tumour-7-F1-3-ex2_FS-65V.29166.29166.4.0.dta	4	3496.71	4.72953e-08	2.97099e-07	-0.012226	-3.49641	1	4.06886e-13
	2	mice-tumour-7-F1-2-ex2_FS-65V.29118.29118.4.0.dta	4	3496.72	2.68851e-07	9.38771e-06	-0.009291	-2.65706	1	5.60651e-10
	3	mice-tumour-7-F1-1-ex2_FS-65v.29339.29339.4.2.dta	4	3496.72	2.0999e-20	0.000472184	-0.008101	-2.31674	1	1.0519e-12
49	AIKLAANDFFR(3)-ADKQISLPAK(3)	2515.39	Acetyl[ProteinN-term](14)	NP_001177990 GeneID:79751 SLC25A22(83)-NP_001177990 GeneID:79751 SLC25A22(4)/NP_001177990 GeneID:79751 SLC25A22(83)-NP_001177989 GeneID:79751 SLC25A22(4)/NP_001177990 GeneID:79751 SLC25A22(83)-NP_078974 GeneID:79751 SLC25A22(4)/NP_001177989 GeneID:79751 SLC25A22(83)-NP_001177990 GeneID:79751 SLC25A22(4)/NP_001177989 GeneID:79751 SLC25A22(83)-NP_001177989 GeneID:79751 SLC25A22(4)/NP_001177989 Gene…	Intra-Protein							NP_001177990	GeneID:79751	SLC25A22(83)	NP_001177990	GeneID:79751	SLC25A22(4)
												NP_113669	GeneID:83733	SLC25A18(82)	NP_001177990	GeneID:79751	SLC25A22(4)
	1	mice-tumour-7-F14-2-ex2_FS-65V.28837.28837.3.0.dta	3	2515.39	6.76443e-05	8.57372e-06	-0.006639	-2.63935	8.61752e-06	0.000151566
	2	mice-tumour-7-F14-3-ex2_FS-65V.28800.28800.3.0.dta	3	2515.39	0.00107711	0.00608545	-0.004736	-1.88281	6.03726e-08	6.51858e-05
	3	mice-tumour-7-F14-1-ex2_FS-65V.28906.28906.3.0.dta	3	2515.39	1	0.0673121	-0.006599	-2.62345	1	1
50	AINKLIGLVR(4)-KATQSR(1)	1924.17	null	NP_004555 GeneID:5188 GATB(529)-NP_004555 GeneID:5188 GATB(536)/	Intra-Protein							NP_004555	GeneID:5188	GATB(529)	NP_004555	GeneID:5188	GATB(536)
	1	mice-tumour-7-F11-2-ex2_FS-45v.15718.15718.4.1.dta	4	1924.16	0.050522	0.252718	-0.006665	-3.46383	0.0727216	0.0191798
51	AKAGAGSATLSMAYAGAR(2)-KPGMTR(1)	2480.27	null	NP_005909 GeneID:4191 MDH2(241)-NP_005909 GeneID:4191 MDH2(105)/NP_005909 GeneID:4191 MDH2(241)-NP_001269332 GeneID:4191 MDH2(105)/NP_001269332 GeneID:4191 MDH2(199)-NP_005909 GeneID:4191 MDH2(105)/NP_001269332 GeneID:4191 MDH2(199)-NP_001269332 GeneID:4191 MDH2(105)/NP_001269333 GeneID:4191 MDH2(134)-NP_005909 GeneID:4191 MDH2(105)/NP_001269333 GeneID:4191 MDH2(134)-NP_001269332 GeneID:4191 MDH2…	Intra-Protein							NP_005909	GeneID:4191	MDH2(241)	NP_005909	GeneID:4191	MDH2(105)
	1	mice-tumour-7-F1-2-ex2_FS-65V.13493.13493.3.1.dta	3	2480.27	0.000341651	0.123726	-0.008918	-3.59557	0.000422821	6.10997e-05
	2	mice-tumour-7-F1-3-ex2_FS-65V.13653.13653.3.1.dta	3	2480.26	0.0258432	0.368623	-0.011031	-4.44749	5.11092e-05	0.00757848
	3	mice-tumour-7-F1-3-ex2_FS-65V.13625.13625.3.1.dta	3	2480.26	0.0703831	0.446879	-0.011031	-4.44749	0.000410017	0.0730509
	4	mice-tumour-7-F1-1-ex2_FS-65v.13729.13729.3.1.dta	3	2480.26	0.297018	0.497032	-0.012422	-5.00832	1	0.206096
52	AKDSHQER(2)-KIEVLKK(6)	1965.11	null	NP_116205 GeneID:84902 CEP89(452)-NP_116205 GeneID:84902 CEP89(588)/	Intra-Protein							NP_116205	GeneID:84902	CEP89(452)	NP_116205	GeneID:84902	CEP89(588)
	1	mice-tumour-7-F12-2-ex2_FS-65v.19448.19448.3.0.dta	3	1965.1	0.0146986	0.453205	-0.015719	-7.99903	0.0097813	0.0202494
53	AKEELEK(2)-KEVAGAK(1)	1685.93	null	NP_001093640 GeneID:10989 IMMT(288)-NP_001093640 GeneID:10989 IMMT(304)/NP_001093640 GeneID:10989 IMMT(288)-NP_006830 GeneID:10989 IMMT(315)/NP_001093640 GeneID:10989 IMMT(288)-NP_001093639 GeneID:10989 IMMT(314)/NP_006830 GeneID:10989 IMMT(299)-NP_001093640 GeneID:10989 IMMT(304)/NP_006830 GeneID:10989 IMMT(299)-NP_006830 GeneID:10989 IMMT(315)/NP_006830 GeneID:10989 IMMT(299)-NP_001093639 GeneI…	Intra-Protein							NP_006830	GeneID:10989	IMMT(299)	NP_006830	GeneID:10989	IMMT(315)
	1	mice-tumour-7-F17-2-ex2_FS-45v.3501.3501.4.0.dta	4	1685.93	1	0.308748	-0.003086	-1.83044	1	1
54	AKEIGFSDK(2)-KNIHPWVK(1)	2153.18	null	NP_001116105 GeneID:1373 CPS1(914)-NP_001116105 GeneID:1373 CPS1(941)/NP_001116105 GeneID:1373 CPS1(914)-NP_001866 GeneID:1373 CPS1(935)/NP_001116105 GeneID:1373 CPS1(914)-NP_001116106 GeneID:1373 CPS1(484)/NP_001866 GeneID:1373 CPS1(908)-NP_001116105 GeneID:1373 CPS1(941)/NP_001866 GeneID:1373 CPS1(908)-NP_001866 GeneID:1373 CPS1(935)/NP_001866 GeneID:1373 CPS1(908)-NP_001116106 GeneID:1373 CPS1…	Intra-Protein							NP_001866	GeneID:1373	CPS1(908)	NP_001866	GeneID:1373	CPS1(935)
	1	mice-tumour-7-F12-2-ex2_FS-45v.13513.13513.4.0.dta	4	2153.17	3.02677e-10	2.12678e-06	-0.004106	-1.90695	1.93082e-12	8.07017e-11
	2	mice-tumour-7-F12-2-ex2_FS-65v.14815.14815.5.0.dta	5	2153.17	0.02895	0.000480626	-0.003009	-1.39747	0.0077347	0.00809723
	3	mice-tumour-7-F12-3-ex2_FS-45V.13244.13244.4.0.dta	4	2153.17	1.7936e-09	0.00096017	-0.00534	-2.48006	1.40082e-09	1.32985e-09
	4	mice-tumour-7-F13-1-ex2_FS-45V.13618.13618.4.1.dta	4	2153.17	3.8164e-08	0.0021198	-0.003837	-1.78202	4.67197e-09	4.20306e-09
	5	mice-tumour-7-F12-1-ex2_FS-65v.14970.14970.5.0.dta	5	2153.17	0.184798	0.00328005	-0.00263	-1.22145	0.126576	0.03273
	6	mice-tumour-7-F12-3-ex2_FS-45V.13191.13191.4.0.dta	4	2153.17	7.5032e-07	0.00363089	-0.005251	-2.43872	2.28229e-08	1.10445e-06
	7	mice-tumour-7-F13-3-ex2_FS-45V.13644.13644.4.0.dta	4	2153.17	7.07851e-08	0.00378872	-0.00483	-2.2432	3.49682e-08	2.63476e-08
	8	mice-tumour-7-F12-1-ex2_FS-45v.13465.13465.4.0.dta	4	2153.17	1.23419e-08	0.00778841	-0.004573	-2.12384	5.8299e-12	6.25214e-09
	9	mice-tumour-7-F13-2-ex2_FS-45V.13533.13533.4.0.dta	4	2153.17	2.09022e-05	0.00826218	-0.005133	-2.38392	2.01292e-07	4.20063e-05
55	AKEIGFSDK(2)-WFLYKMR(5)	2175.13	null	NP_001116105 GeneID:1373 CPS1(914)-NP_001116105 GeneID:1373 CPS1(886)/NP_001116105 GeneID:1373 CPS1(914)-NP_001866 GeneID:1373 CPS1(880)/NP_001116105 GeneID:1373 CPS1(914)-NP_001116106 GeneID:1373 CPS1(429)/NP_001866 GeneID:1373 CPS1(908)-NP_001116105 GeneID:1373 CPS1(886)/NP_001866 GeneID:1373 CPS1(908)-NP_001866 GeneID:1373 CPS1(880)/NP_001866 GeneID:1373 CPS1(908)-NP_001116106 GeneID:1373 CPS1…	Intra-Protein							NP_001866	GeneID:1373	CPS1(908)	NP_001866	GeneID:1373	CPS1(880)
	1	mice-tumour-7-F18-1-ex2_FS-65v.24463.24463.4.0.dta	4	2175.12	2.5476e-05	1.50035e-07	-0.005911	-2.71754	2.53185e-07	0.000269397
	2	mice-tumour-7-F18-2-ex2_FS-65v.24323.24323.4.0.dta	4	2175.12	2.14962e-05	5.62589e-05	-0.006951	-3.19567	4.99248e-07	9.49886e-05
	3	mice-tumour-7-F18-3-ex2_FS-65v.24352.24352.4.1.dta	4	2175.13	0.000393157	0.0010683	-0.004516	-2.0762	8.57024e-07	0.000546601
	4	mice-tumour-7-F18-3-ex2_FS-65v.24327.24327.4.1.dta	4	2175.13	0.00156516	0.00185419	-0.004401	-2.02333	6.37451e-06	0.00496724
56	AKELWEK(2)-TLEKEPR(4)	1913.04	null	NP_001230710 GeneID:84293 PRXL2A(56)-NP_001230710 GeneID:84293 PRXL2A(48)/NP_001230710 GeneID:84293 PRXL2A(56)-NP_001230709 GeneID:84293 PRXL2A(59)/NP_001230710 GeneID:84293 PRXL2A(56)-NP_001230708 GeneID:84293 PRXL2A(59)/NP_001230710 GeneID:84293 PRXL2A(56)-NP_001230707 GeneID:84293 PRXL2A(59)/NP_001230710 GeneID:84293 PRXL2A(56)-NP_115709 GeneID:84293 PRXL2A(59)/NP_001230710 GeneID:84293 PRXL2A…	Intra-Protein							NP_001230709	GeneID:84293	PRXL2A(67)	NP_001230709	GeneID:84293	PRXL2A(59)
	1	mice-tumour-7-F17-2-ex2_FS-45v.10814.10814.4.0.dta	4	1913.03	0.305013	0.037119	-0.003646	-1.90587	0.000257267	0.582887
	2	mice-tumour-7-F17-3-ex2_FS-45v.10801.10801.4.0.dta	4	1913.04	0.0788248	0.0768086	-0.00235	-1.22841	0.000510654	0.190458
	3	mice-tumour-7-F17-1-ex2_FS-45v.10754.10754.4.1.dta	4	1913.03	0.0222511	0.237414	-0.004044	-2.11391	0.000146144	0.0679068
57	AKIIAEGANGPTTPEADK(2)-QLTKSNAPR(4)	2934.55	null	NP_036216 GeneID:2747 GLUD2(399)-NP_036216 GeneID:2747 GLUD2(390)/NP_036216 GeneID:2747 GLUD2(399)-NP_005262 GeneID:2746 GLUD1(390)/NP_005262 GeneID:2746 GLUD1(399)-NP_036216 GeneID:2747 GLUD2(390)/NP_005262 GeneID:2746 GLUD1(399)-NP_005262 GeneID:2746 GLUD1(390)/	Intra-Protein							NP_036216	GeneID:2747	GLUD2(399)	NP_036216	GeneID:2747	GLUD2(390)
												NP_036216	GeneID:2747	GLUD2(399)	NP_005262	GeneID:2746	GLUD1(390)
												NP_005262	GeneID:2746	GLUD1(399)	NP_036216	GeneID:2747	GLUD2(390)
												NP_005262	GeneID:2746	GLUD1(390)	NP_005262	GeneID:2746	GLUD1(390)
	1	mice-tumour-7-F7-1-ex2_FS-45V.8627.8627.4.0.dta	4	2934.54	0.0124547	0.275811	-0.009724	-3.31362	0.0734603	0.0328909
58	AKPAEAPAAAAPK(2)-KTGAAPAK(1)	2073.17	null	NP_001924 GeneID:1743 DLST(154)-NP_001924 GeneID:1743 DLST(145)/	Intra-Protein							NP_001924	GeneID:1743	DLST(154)	NP_001924	GeneID:1743	DLST(145)
	1	mice-tumour-7-F11-2-ex2_FS-45v.2528.2528.4.0.dta	4	2073.17	0.000299157	0.00015538	-0.003929	-1.89516	2.01445e-05	0.000145117
	2	mice-tumour-7-F12-1-ex2_FS-45v.2656.2656.4.0.dta	4	2073.16	0.000941582	0.0195438	-0.005579	-2.69105	3.58002e-06	0.000745074
	3	mice-tumour-7-F12-2-ex2_FS-45v.2614.2614.4.0.dta	4	2073.16	0.00010446	0.0342261	-0.006951	-3.35284	8.19957e-06	2.29803e-05
	4	mice-tumour-7-F12-3-ex2_FS-45V.2500.2500.4.1.dta	4	2073.16	0.00018668	0.0553964	-0.006607	-3.18691	7.14783e-05	0.000124327
59	ALAEHKKK(7)-MLGAALR(1)	1793.05	null	NP_065154 GeneID:57143 ADCK1(470)-NP_004246 GeneID:9377 COX5A(1)/NP_001136017 GeneID:57143 ADCK1(402)-NP_004246 GeneID:9377 COX5A(1)/	Inter-Protein							NP_065154	GeneID:57143	ADCK1(470)	NP_004246	GeneID:9377	COX5A(1)
	1	mice-tumour-7-F5-1-ex2_FS-45v.6787.6787.3.1.dta	3	1793.06	7.32657e-05	0.00584806	0.013366	7.45435	0.000465689	0.000975024
60	ALEHFPMLQKDK(10)-SSYVLSKSR(7)	2620.38	null	NP_001076581 GeneID:2820 GPD2(209)-NP_001076581 GeneID:2820 GPD2(197)/NP_001076581 GeneID:2820 GPD2(209)-NP_000399 GeneID:2820 GPD2(197)/NP_000399 GeneID:2820 GPD2(209)-NP_001076581 GeneID:2820 GPD2(197)/NP_000399 GeneID:2820 GPD2(209)-NP_000399 GeneID:2820 GPD2(197)/	Intra-Protein							NP_001076581	GeneID:2820	GPD2(209)	NP_001076581	GeneID:2820	GPD2(197)
	1	mice-tumour-7-F13-2-ex2_FS-65V.18985.18985.4.0.dta	4	2620.38	0.000676087	0.00385535	-0.00145	-0.553355	7.58749e-06	0.00119944
	2	mice-tumour-7-F13-1-ex2_FS-65V.19083.19083.4.0.dta	4	2620.38	0.000152657	0.00772752	-0.003821	-1.45819	0.00151072	0.00015486
61	ALENVLSGKA(9)-GVGAKLGLR(5)	2009.18	null	NP_002479 GeneID:4695 NDUFA2(98)-NP_002479 GeneID:4695 NDUFA2(13)/NP_002479 GeneID:4695 NDUFA2(98)-NP_001171941 GeneID:4695 NDUFA2(13)/	Intra-Protein							NP_002479	GeneID:4695	NDUFA2(98)	NP_002479	GeneID:4695	NDUFA2(13)
	1	mice-tumour-7-F11-3-ex2_FS-65v.25529.25529.3.0.dta	3	2009.17	0.00112759	0.00746831	-0.003878	-1.93014	0.000135254	0.000358688
	2	mice-tumour-7-F11-3-ex2_FS-65v.25484.25484.3.0.dta	3	2009.17	0.000946871	0.00959226	-0.003878	-1.93014	0.000774999	0.000987627
	3	mice-tumour-7-F12-2-ex2_FS-65v.25491.25491.3.0.dta	3	2009.17	0.000162788	0.0104528	-0.005784	-2.87879	3.1923e-05	1.6469e-05
	4	mice-tumour-7-F12-1-ex2_FS-65v.25706.25706.3.0.dta	3	2009.17	0.000168073	0.0997209	-0.008831	-4.39534	0.000781226	1.80272e-05
	5	mice-tumour-7-F11-3-ex2_FS-65v.25501.25501.3.2.dta	3	2009.17	0.334475	0.121883	-0.003878	-1.93014	0.678837	0.115026
	6	mice-tumour-7-F11-2-ex2_FS-65v.25658.25658.3.0.dta	3	2009.17	0.00617596	0.193795	-0.004023	-2.00231	0.00176856	0.00467073
	7	mice-tumour-7-F11-1-ex2_FS-65v.25680.25680.3.0.dta	3	2009.17	0.010268	0.194042	-0.0046	-2.2895	0.00306091	0.0145648
	8	mice-tumour-7-F11-1-ex2_FS-65v.25709.25709.3.0.dta	3	2009.17	0.16171	0.211636	-0.00449	-2.23475	0.158317	0.0602776
	9	mice-tumour-7-F11-1-ex2_FS-65v.25762.25762.3.0.dta	3	2009.17	0.356887	0.251867	-0.004572	-2.27556	0.701185	0.023365
	10	mice-tumour-7-F11-2-ex2_FS-65v.25708.25708.3.0.dta	3	2009.17	0.00909569	0.313497	-0.004023	-2.00231	0.00638719	0.00574784
	11	mice-tumour-7-F12-3-ex2_FS-65V.25191.25191.3.0.dta	3	2009.17	0.0753718	0.591376	-0.006747	-3.35809	0.120506	0.155977
62	ALEQFATVVEAKLIK(12)-KGIVNEQFLLQR(1)	3241.86	null	NP_001257377 GeneID:37 ACADVL(474)-NP_001257377 GeneID:37 ACADVL(480)/NP_001257377 GeneID:37 ACADVL(474)-NP_000009 GeneID:37 ACADVL(556)/NP_001257377 GeneID:37 ACADVL(474)-NP_001257376 GeneID:37 ACADVL(579)/NP_001257377 GeneID:37 ACADVL(474)-NP_001029031 GeneID:37 ACADVL(534)/NP_000009 GeneID:37 ACADVL(550)-NP_001257377 GeneID:37 ACADVL(480)/NP_000009 GeneID:37 ACADVL(550)-NP_000009 GeneID:37 ACA…	Intra-Protein							NP_001257376	GeneID:37	ACADVL(573)	NP_001257376	GeneID:37	ACADVL(579)
	1	mice-tumour-7-F18-1-ex2_FS-65v.31692.31692.4.1.dta	4	3241.85	0.000218894	1.88647e-05	-0.006579	-2.02939	0.00060144	7.53155e-05
	2	mice-tumour-7-F18-3-ex2_FS-65v.31660.31660.4.0.dta	4	3241.85	3.00172e-05	0.000114058	-0.006137	-1.89305	2.78218e-05	2.08622e-06
	3	mice-tumour-7-F18-2-ex2_FS-65v.31671.31671.5.1.dta	5	3241.84	1	0.004155	-0.011969	-3.69202	1	0.454487
63	ALETCGGDLKQAEIWLHK(10)-ELLMKLR(5)	3108.66	Carbamidomethyl[C](5)	NP_001166168 GeneID:10102 TSFM(76)-NP_001166168 GeneID:10102 TSFM(52)/NP_001166168 GeneID:10102 TSFM(76)-NP_001166166 GeneID:10102 TSFM(52)/NP_001166168 GeneID:10102 TSFM(76)-NP_001166167 GeneID:10102 TSFM(52)/NP_001166168 GeneID:10102 TSFM(76)-NP_005717 GeneID:10102 TSFM(52)/NP_001166166 GeneID:10102 TSFM(76)-NP_001166168 GeneID:10102 TSFM(52)/NP_001166166 GeneID:10102 TSFM(76)-NP_001166166 Gene…	Intra-Protein							NP_001166167	GeneID:10102	TSFM(76)	NP_001166167	GeneID:10102	TSFM(52)
	1	mice-tumour-7-F18-1-ex2_FS-65v.26221.26221.5.0.dta	5	3108.66	0.984261	4.53446e-06	0.002155	0.693225	0.0213835	1
	2	mice-tumour-7-F18-2-ex2_FS-65v.26087.26087.5.0.dta	5	3108.66	1	0.000222663	-0.000109	-0.035063	1	1
64	ALGPRCGAIR(1)-ALGPRCGAIR(1)	2278.24	Carbamidomethyl[C](6);Carbamidomethyl[C](19)	NP_001229811 GeneID:55739 NAXD(2)-NP_001229811 GeneID:55739 NAXD(2)/	Inter-Protein							NP_001229811	GeneID:55739	NAXD(2)	NP_001229811	GeneID:55739	NAXD(2)
	1	mice-tumour-7-F15-3-ex2_FS-65v.2632.2632.6.1.dta	6	2278.24	1	0.541363	0.002611	1.14606	1	1
65	ALKASAPAPGHH(3)-KYHLTK(1)	2083.14	null	NP_001120865 GeneID:9556 ATP5MPL(66)-NP_001165074 GeneID:9581 PREPL(45)/NP_001120865 GeneID:9556 ATP5MPL(66)-NP_006027 GeneID:9581 PREPL(45)/NP_001120865 GeneID:9556 ATP5MPL(66)-NP_001035845 GeneID:9581 PREPL(45)/NP_001120865 GeneID:9556 ATP5MPL(66)-NP_001035844 GeneID:9581 PREPL(45)/NP_001120865 GeneID:9556 ATP5MPL(66)-NP_001165077 GeneID:9581 PREPL(45)/NP_004885 GeneID:9556 ATP5MPL(49)-NP_00116…	Inter-Protein							NP_001120865	GeneID:9556	ATP5MPL(66)	NP_001165074	GeneID:9581	PREPL(45)
	1	mice-tumour-7-F15-2-ex2_FS-45V.6391.6391.4.1.dta	4	2083.14	0.00682831	0.220068	-0.000403	-0.193458	3.19031e-07	0.00423252
	2	mice-tumour-7-F15-3-ex2_FS-45v.6328.6328.4.3.dta	4	2083.15	0.0096161	0.341842	0.003469	1.66527	3.01822e-09	0.0113864
66	ALMLQGVDLLADAVAVTMGPKGR(21)-VTKDGVTVAK(3)	3480.92	null	NP_002147 GeneID:3329 HSPD1(58)-NP_002147 GeneID:3329 HSPD1(75)/NP_002147 GeneID:3329 HSPD1(58)-NP_955472 GeneID:3329 HSPD1(75)/NP_955472 GeneID:3329 HSPD1(58)-NP_002147 GeneID:3329 HSPD1(75)/NP_955472 GeneID:3329 HSPD1(58)-NP_955472 GeneID:3329 HSPD1(75)/	Intra-Protein							NP_002147	GeneID:3329	HSPD1(58)	NP_002147	GeneID:3329	HSPD1(75)
	1	mice-tumour-7-F20-3-ex2_FS-45v.31261.31261.4.0.dta	4	3480.91	0.00514876	0.00285379	-0.005859	-1.68318	0.000157602	0.00757702
	2	mice-tumour-7-F20-1-ex2_FS-45v.31279.31279.4.0.dta	4	3480.91	0.00213924	0.0348298	-0.008446	-2.42637	1.30914e-07	0.00210354
67	ALVSTKWLAESIR(6)-TGKLGPGLR(3)	2509.45	null	NP_003303 GeneID:7263 TST(14)-NP_003303 GeneID:7263 TST(24)/NP_003303 GeneID:7263 TST(14)-NP_001257412 GeneID:7263 TST(24)/NP_001257412 GeneID:7263 TST(14)-NP_003303 GeneID:7263 TST(24)/NP_001257412 GeneID:7263 TST(14)-NP_001257412 GeneID:7263 TST(24)/	Intra-Protein							NP_003303	GeneID:7263	TST(14)	NP_003303	GeneID:7263	TST(24)
	1	mice-tumour-7-F9-2-ex2_FS-45V.23515.23515.4.0.dta	4	2509.45	3.53537e-05	0.000933198	-0.001036	-0.412839	8.31408e-09	1.37782e-05
	2	mice-tumour-7-F9-1-ex2_FS-45v.23637.23637.4.0.dta	4	2509.45	9.88897e-05	0.00464407	-0.002095	-0.834844	1.22705e-08	5.39422e-05
	3	mice-tumour-7-F9-3-ex2_FS-45v.23653.23653.4.0.dta	4	2509.45	1.12536e-07	0.00592519	-0.003942	-1.57086	5.51845e-11	2.38566e-08
	4	mice-tumour-7-F9-3-ex2_FS-45v.23753.23753.4.1.dta	4	2509.45	1	0.331653	-0.00454	-1.80916	0.234439	1
68	AMAYLAWR(1)-ALKAASK(3)	1822.99	Oxidation[M](2)	NP_996667 GeneID:10455 ECI2(2)-NP_996667 GeneID:10455 ECI2(177)/NP_996667 GeneID:10455 ECI2(2)-NP_001159482 GeneID:10455 ECI2(147)/NP_996667 GeneID:10455 ECI2(2)-NP_006108 GeneID:10455 ECI2(147)/	Intra-Protein							NP_996667	GeneID:10455	ECI2(2)	NP_996667	GeneID:10455	ECI2(177)
	1	mice-tumour-7-F8-2-ex2_FS45V.25700.25700.3.0.dta	3	1822.99	0.134182	9.04647e-05	0.001593	0.87384	0.407243	0.102208
69	AMQDAEVSKSDIGEVILVGGMTR(9)-MPKVQQTVQDLFGR(3)	4190.13	null	NP_004125 GeneID:3313 HSPA9(377)-NP_004125 GeneID:3313 HSPA9(394)/	Intra-Protein							NP_004125	GeneID:3313	HSPA9(377)	NP_004125	GeneID:3313	HSPA9(394)
	1	mice-tumour-7-F19-1-ex2_FS-45v.30257.30257.4.1.dta	4	4190.13	6.92082e-05	0.000514989	-0.000575	-0.137227	9.11401e-06	5.85196e-06
	2	mice-tumour-7-F19-2-ex2_FS-45v.30295.30295.4.2.dta	4	4190.13	0.00242721	0.0321663	0.000638	0.152263	0.0019104	7.3037e-10
	3	mice-tumour-7-F19-3-ex2_FS-45v.30276.30276.4.5.dta	4	4190.09	0.241349	0.165093	-0.035602	-8.49663	0.0942475	0.000386368
70	AMTAKGGDISVCEWYQR(5)-AEDMETKIK(7)	3215.51	Carbamidomethyl[C](12);Acetyl[ProteinN-term](20)	NP_001854 GeneID:1340 COX6B1(47)-NP_001854 GeneID:1340 COX6B1(8)/	Intra-Protein							NP_001854	GeneID:1340	COX6B1(47)	NP_001854	GeneID:1340	COX6B1(8)
	1	mice-tumour-7-F19-1-ex2_FS-45v.23004.23004.3.0.dta	3	3215.49	9.71643e-08	1.32341e-05	-0.013916	-4.32778	1.26036e-08	1.79519e-06
	2	mice-tumour-7-F19-2-ex2_FS-45v.23028.23028.3.0.dta	3	3215.5	5.6953e-10	0.0409752	-0.009643	-2.99891	1	7.64704e-06
71	AMTAKGGDISVCEWYQR(5)-AEGTFPGKI(8)	3028.45	Carbamidomethyl[C](12)	NP_001854 GeneID:1340 COX6B1(47)-NP_001854 GeneID:1340 COX6B1(85)/	Intra-Protein							NP_001854	GeneID:1340	COX6B1(47)	NP_001854	GeneID:1340	COX6B1(85)
	1	mice-tumour-7-F16-3-ex2_FS-45v.23513.23513.3.0.dta	3	3028.45	1.70082e-06	8.28704e-05	-0.000819	-0.270435	5.6431e-07	3.73023e-05
	2	mice-tumour-7-F16-2-ex2_FS-45v.23479.23479.3.0.dta	3	3028.45	0.00137757	0.00863816	-0.004221	-1.39378	5.08848e-08	4.38302e-05
	3	mice-tumour-7-F16-1-ex2_FS-45v.23576.23576.3.0.dta	3	3028.45	7.6964e-05	0.0491748	-0.008091	-2.67166	2.54447e-11	0.000464098
72	AMTAKGGDISVCEWYQR(5)-NYKTAPFDSR(3)	3307.55	Carbamidomethyl[C](12)	NP_001854 GeneID:1340 COX6B1(47)-NP_001854 GeneID:1340 COX6B1(13)/	Intra-Protein							NP_001854	GeneID:1340	COX6B1(47)	NP_001854	GeneID:1340	COX6B1(13)
	1	mice-tumour-7-F13-3-ex2_FS-65V.21640.21640.4.0.dta	4	3307.54	3.35774e-05	1.93498e-07	-0.009082	-2.74584	1	0.00103988
	2	mice-tumour-7-F14-2-ex2_FS-65V.21878.21878.4.0.dta	4	3307.54	2.55875e-11	2.51283e-06	-0.01195	-3.61294	5.86531e-12	1.25243e-06
	3	mice-tumour-7-F13-2-ex2_FS-65V.21718.21718.4.0.dta	4	3307.54	0.000813022	3.4938e-05	-0.006269	-1.89536	1	0.00127421
	4	mice-tumour-7-F13-1-ex2_FS-65V.21803.21803.4.0.dta	4	3307.54	0.00765887	7.22215e-05	-0.008511	-2.5732	1	0.00106709
	5	mice-tumour-7-F14-3-ex2_FS-65V.21808.21808.4.1.dta	4	3307.54	7.36394e-12	0.000571274	-0.006983	-2.11123	1.3352e-14	2.90419e-06
	6	mice-tumour-7-F14-1-ex2_FS-65V.21946.21946.4.0.dta	4	3307.54	7.82174e-10	0.00155386	-0.011835	-3.57818	8.04022e-11	1.07772e-05
	7	mice-tumour-7-F14-2-ex2_FS-65V.21891.21891.4.0.dta	4	3307.54	1.32664e-07	0.00517468	-0.01195	-3.61294	2.60262e-07	0.000644018
73	AMVASGSELGKK(11)-LKATMDAGK(2)	2249.19	null	NP_001186128 GeneID:204 AK2(62)-NP_001186128 GeneID:204 AK2(65)/NP_001186128 GeneID:204 AK2(62)-NP_037543 GeneID:204 AK2(65)/NP_001186128 GeneID:204 AK2(62)-NP_001616 GeneID:204 AK2(65)/NP_037543 GeneID:204 AK2(62)-NP_001186128 GeneID:204 AK2(65)/NP_037543 GeneID:204 AK2(62)-NP_037543 GeneID:204 AK2(65)/NP_037543 GeneID:204 AK2(62)-NP_001616 GeneID:204 AK2(65)/NP_001616 GeneID:204 AK2(62)-NP_0011…	Intra-Protein							NP_001186128	GeneID:204	AK2(62)	NP_001186128	GeneID:204	AK2(65)
	1	mice-tumour-7-F10-3-ex2_FS-65v.10800.10800.3.0.dta	3	2249.19	5.03817e-05	4.71244e-06	-0.001038	-0.4615	2.49395e-05	1.23411e-08
	2	mice-tumour-7-F10-2-ex2_FS-65v.10853.10853.3.0.dta	3	2249.19	0.367292	1.10022e-05	-0.00019	-0.084475	1	0.00925775
	3	mice-tumour-7-F10-1-ex2_FS-65v.10941.10941.3.0.dta	3	2249.19	0.0148925	0.0090517	0.000482	0.2143	0.0790649	1.85589e-05
74	ANAEKTSGSNVK(5)-DALKTEFK(4)	2294.19	null	NP_008817 GeneID:514 ATP5F1E(37)-NP_008817 GeneID:514 ATP5F1E(28)/	Intra-Protein							NP_008817	GeneID:514	ATP5F1E(37)	NP_008817	GeneID:514	ATP5F1E(28)
	1	mice-tumour-7-F12-2-ex2_FS-65v.8820.8820.3.0.dta	3	2294.18	2.86647e-12	2.65435e-05	-0.005136	-2.2387	7.70528e-08	0.000132962
	2	mice-tumour-7-F12-1-ex2_FS-65v.8889.8889.3.0.dta	3	2294.18	2.07884e-10	0.000124937	-0.005361	-2.33677	1.24525e-07	3.32852e-07
	3	mice-tumour-7-F12-3-ex2_FS-65V.8771.8771.3.0.dta	3	2294.18	4.76893e-13	0.0093284	-0.003734	-1.62759	2.10118e-08	9.78074e-05
75	ANLEKAQAELVGTADEATR(5)-YSQICAKAVR(7)	3319.69	Carbamidomethyl[C](27)	NP_001678 GeneID:513 ATP5F1D(136)-NP_008817 GeneID:514 ATP5F1E(21)/NP_001001975 GeneID:513 ATP5F1D(136)-NP_008817 GeneID:514 ATP5F1E(21)/	Inter-Protein							NP_001678	GeneID:513	ATP5F1D(136)	NP_008817	GeneID:514	ATP5F1E(21)
	1	mice-tumour-7-F14-1-ex2_FS-45V.17976.17976.4.2.dta	4	3319.7	0.0310013	0.280979	0.002121	0.638914	0.00053225	0.125006
76	ANVAKAGLVDDFEK(5)-KFNALK(1)	2334.27	null	NP_006347 GeneID:10476 ATP5PD(63)-NP_006347 GeneID:10476 ATP5PD(73)/NP_001003785 GeneID:10476 ATP5PD(63)-NP_006347 GeneID:10476 ATP5PD(73)/	Intra-Protein							NP_006347	GeneID:10476	ATP5PD(63)	NP_006347	GeneID:10476	ATP5PD(73)
	1	mice-tumour-7-F14-2-ex2_FS-45V.18659.18659.4.0.dta	4	2334.27	2.54472e-05	1.59403e-09	-0.000603	-0.258325	2.36057e-07	0.000194032
	2	mice-tumour-7-F14-1-ex2_FS-45V.18757.18757.4.0.dta	4	2334.27	0.000255615	1.07102e-05	-0.002966	-1.27063	6.58488e-05	0.00144247
	3	mice-tumour-7-F17-3-ex2_FS-45v.18112.18112.4.0.dta	4	2334.27	7.68163e-08	1.29112e-05	-0.00227	-0.972467	6.581e-10	4.27415e-08
	4	mice-tumour-7-F17-3-ex2_FS-45v.18215.18215.3.0.dta	3	2334.27	2.81674e-08	1.72687e-05	-0.002027	-0.868366	1.19204e-19	4.12514e-08
	5	mice-tumour-7-F17-1-ex2_FS-45v.18105.18105.4.0.dta	4	2334.27	1.35182e-06	3.04285e-05	-0.00289	-1.23807	2.92678e-09	3.47601e-07
	6	mice-tumour-7-F14-1-ex2_FS-45V.18768.18768.4.0.dta	4	2334.27	0.000217489	4.95851e-05	-0.002966	-1.27063	0.00217314	0.000972078
	7	mice-tumour-7-F17-2-ex2_FS-45v.18246.18246.4.0.dta	4	2334.27	4.12521e-08	6.68415e-05	-0.001166	-0.499514	1.03135e-10	4.17832e-08
	8	mice-tumour-7-F17-1-ex2_FS-45v.18112.18112.3.1.dta	3	2334.27	1.44463e-06	0.00135765	-0.002633	-1.12798	1.44639e-10	4.82951e-06
	9	mice-tumour-7-F14-3-ex2_FS-45V.18637.18637.4.0.dta	4	2334.27	6.61168e-05	0.00675543	0.002203	0.943764	1.74337e-11	3.58323e-05
	10	mice-tumour-7-F14-3-ex2_FS-45V.18606.18606.4.0.dta	4	2334.27	0.000361373	0.00711627	0.002203	0.943764	7.83073e-07	0.000323993
	11	mice-tumour-7-F14-3-ex2_FS-45V.18632.18632.3.0.dta	3	2334.27	5.39527e-05	0.190231	-0.004583	-1.96335	0.00018628	0.000109978
77	APHKESTLPR(4)-KNAEMYK(1)	2156.12	null	NP_115719 GeneID:84303 CHCHD6(65)-NP_115719 GeneID:84303 CHCHD6(165)/	Intra-Protein							NP_115719	GeneID:84303	CHCHD6(65)	NP_115719	GeneID:84303	CHCHD6(165)
	1	mice-tumour-7-F6-1-ex2_FS-65v.18886.18886.3.1.dta	3	2156.12	1	0.465403	0.007372	3.41911	0.0868271	1
78	AQNLKDLAGR(5)-AAKVFESIGK(3)	2356.29	Acetyl[ProteinN-term](0);Acetyl[ProteinN-term](13)	NP_001138303 GeneID:11331 PHB2(6)-NP_002625 GeneID:5245 PHB(4)/NP_001138303 GeneID:11331 PHB2(6)-NP_001268425 GeneID:5245 PHB(4)/NP_001138303 GeneID:11331 PHB2(6)-NP_001268644 GeneID:5245 PHB(4)/NP_001138303 GeneID:11331 PHB2(6)-NP_001268426 GeneID:5245 PHB(4)/NP_001254629 GeneID:11331 PHB2(6)-NP_002625 GeneID:5245 PHB(4)/NP_001254629 GeneID:11331 PHB2(6)-NP_001268425 GeneID:5245 PHB(4)/NP_001254…	Inter-Protein							NP_001138303	GeneID:11331	PHB2(6)	NP_002625	GeneID:5245	PHB(4)
	1	mice-tumour-7-F11-1-ex2_FS-45v.29855.29855.3.0.dta	3	2356.29	0.0660232	0.416739	-0.001499	-0.63617	4.69814e-05	0.0384998
79	AQNLKDLAGR(5)-KISSPTGSK(1)	2169.19	Acetyl[ProteinN-term](0)	NP_001138303 GeneID:11331 PHB2(6)-NP_001138303 GeneID:11331 PHB2(89)/NP_001138303 GeneID:11331 PHB2(6)-NP_001254629 GeneID:11331 PHB2(89)/NP_001254629 GeneID:11331 PHB2(6)-NP_001138303 GeneID:11331 PHB2(89)/NP_001254629 GeneID:11331 PHB2(6)-NP_001254629 GeneID:11331 PHB2(89)/	Intra-Protein							NP_001138303	GeneID:11331	PHB2(6)	NP_001138303	GeneID:11331	PHB2(89)
	1	mice-tumour-7-F1-2-ex2_FS-65V.18211.18211.3.0.dta	3	2169.18	5.43864e-08	6.51753e-07	-0.004721	-2.17639	3.61372e-05	6.53748e-16
	2	mice-tumour-7-F1-3-ex2_FS-65V.18294.18294.3.0.dta	3	2169.18	1.38146e-12	3.28645e-06	-0.003247	-1.49687	1.29181e-09	6.2094e-14
	3	mice-tumour-7-F2-3-ex2_FS-65V.17675.17675.3.0.dta	3	2169.18	1.80675e-12	5.24698e-05	-0.004609	-2.12476	1.0275e-11	5.16722e-11
	4	mice-tumour-7-F1-1-ex2_FS-65v.18403.18403.3.0.dta	3	2169.18	2.56351e-11	0.000108374	-0.002724	-1.25577	2.9879e-10	1.10354e-11
	5	mice-tumour-7-F2-1-ex2_FS-65v.17819.17819.3.0.dta	3	2169.18	1.72942e-12	0.000343304	-0.003087	-1.42311	4.09877e-15	1.01561e-17
	6	mice-tumour-7-F2-2-ex2-_FS-65v.17700.17700.3.0.dta	3	2169.18	1.74734e-12	0.0013107	-0.003844	-1.77209	1.50784e-09	2.47601e-12
80	AQNLKDLAGR(5)-NPGYIKLR(6)	2225.24	Acetyl[ProteinN-term](0)	NP_001138303 GeneID:11331 PHB2(6)-NP_001138303 GeneID:11331 PHB2(250)/NP_001138303 GeneID:11331 PHB2(6)-NP_001254629 GeneID:11331 PHB2(212)/NP_001254629 GeneID:11331 PHB2(6)-NP_001138303 GeneID:11331 PHB2(250)/NP_001254629 GeneID:11331 PHB2(6)-NP_001254629 GeneID:11331 PHB2(212)/	Intra-Protein							NP_001138303	GeneID:11331	PHB2(6)	NP_001138303	GeneID:11331	PHB2(250)
	1	mice-tumour-7-F3-2-ex2_20230117033445_FS-65v.25056.25056.3.0.dta	3	2225.24	1	0.00543471	-3e-06	-0.001348	1	6.45105e-07
	2	mice-tumour-7-F3-2-ex2_FS-65v.25335.25335.3.0.dta	3	2225.24	1	0.0162826	3.6e-05	0.016178	1	1
	3	mice-tumour-7-F3-1-ex2_FS-65v.24687.24687.3.0.dta	3	2225.24	0.00797869	0.0310706	0.00452	2.03124	1	0.000239926
81	AQQTKVAVTPPGLAR(5)-EDWKIIR(4)	2633.48	null	NP_001186913 GeneID:4719 NDUFS1(621)-NP_001186913 GeneID:4719 NDUFS1(635)/NP_001186913 GeneID:4719 NDUFS1(621)-NP_001186911 GeneID:4719 NDUFS1(510)/NP_001186913 GeneID:4719 NDUFS1(621)-NP_004997 GeneID:4719 NDUFS1(621)/NP_001186913 GeneID:4719 NDUFS1(621)-NP_001186912 GeneID:4719 NDUFS1(564)/NP_001186913 GeneID:4719 NDUFS1(621)-NP_001186910 GeneID:4719 NDUFS1(585)/NP_001186911 GeneID:4719 NDUFS1(…	Intra-Protein							NP_001186913	GeneID:4719	NDUFS1(621)	NP_001186913	GeneID:4719	NDUFS1(635)
	1	mice-tumour-7-F5-2-ex2_FS-45v.19189.19189.4.2.dta	4	2633.48	0.400624	0.00377276	-0.001737	-0.659584	0.000124737	1
	2	mice-tumour-7-F5-3-ex2_FS-45v.18993.18993.3.0.dta	3	2633.46	0.0883423	0.102253	-0.012568	-4.7724	1	0.0409687
	3	mice-tumour-7-F5-3-ex2_FS-45v.19039.19039.3.0.dta	3	2633.46	1	0.460608	-0.012568	-4.7724	1	1
82	AQYQDKLAR(6)-KTLSEETR(1)	2193.15	null	NP_114127 GeneID:83858 ATAD3B(135)-NP_114127 GeneID:83858 ATAD3B(117)/NP_114127 GeneID:83858 ATAD3B(135)-NP_001164006 GeneID:55210 ATAD3A(117)/NP_114127 GeneID:83858 ATAD3B(135)-NP_001164007 GeneID:55210 ATAD3A(38)/NP_114127 GeneID:83858 ATAD3B(135)-NP_060658 GeneID:55210 ATAD3A(165)/NP_001164006 GeneID:55210 ATAD3A(135)-NP_114127 GeneID:83858 ATAD3B(117)/NP_001164006 GeneID:55210 ATAD3A(135)-NP_…	Intra-Protein							NP_114127	GeneID:83858	ATAD3B(135)	NP_114127	GeneID:83858	ATAD3B(117)
												NP_114127	GeneID:83858	ATAD3B(135)	NP_001164006	GeneID:55210	ATAD3A(117)
												NP_001164006	GeneID:55210	ATAD3A(135)	NP_114127	GeneID:83858	ATAD3B(117)
												NP_001164006	GeneID:55210	ATAD3A(135)	NP_001164006	GeneID:55210	ATAD3A(117)
	1	mice-tumour-7-F8-3-ex2_FS65v.9646.9646.3.0.dta	3	2193.15	6.15198e-06	0.000838146	-0.003014	-1.37428	1.162e-07	4.39225e-12
	2	mice-tumour-7-F8-2-ex2_FS65V.9561.9561.3.0.dta	3	2193.15	0.0092769	0.00101879	-0.005147	-2.34685	0.000198678	3.34944e-07
	3	mice-tumour-7-F8-1-ex2_FS-65V.9767.9767.3.0.dta	3	2193.15	6.94239e-07	0.0135466	-0.00386	-1.76002	2.53184e-15	7.03606e-09
83	ASSGAGDPLDSKR(12)-EKLTPEQLHSMR(2)	2908.45	Acetyl[ProteinN-term](0)	NP_001035521 GeneID:28958 COA3(13)-NP_001035521 GeneID:28958 COA3(29)/	Intra-Protein							NP_001035521	GeneID:28958	COA3(13)	NP_001035521	GeneID:28958	COA3(29)
	1	mice-tumour-7-F12-2-ex2_FS-65v.16581.16581.4.1.dta	4	2908.44	0.0522714	0.199754	-0.005589	-1.92164	0.089774	0.000190636
	2	mice-tumour-7-F12-3-ex2_FS-65V.16429.16429.4.2.dta	4	2908.45	0.606575	0.248688	0.002094	0.719972	1	0.00120904
	3	mice-tumour-7-F12-3-ex2_FS-65V.16407.16407.4.2.dta	4	2908.45	0.394637	0.301123	0.002094	0.719972	0.730521	0.00120248
84	ASVGECPAPVPVKDK(13)-KLLEVK(1)	2462.36	Carbamidomethyl[C](6);Acetyl[ProteinN-term](0)	NP_004880 GeneID:9551 ATP5MF(14)-NP_001185808 GeneID:100526740 ATP5MF-PTCD1(11)/NP_004880 GeneID:9551 ATP5MF(14)-NP_004880 GeneID:9551 ATP5MF(17)/NP_004880 GeneID:9551 ATP5MF(14)-NP_001034267 GeneID:9551 ATP5MF(11)/NP_004880 GeneID:9551 ATP5MF(14)-NP_001003714 GeneID:9551 ATP5MF(17)/NP_004880 GeneID:9551 ATP5MF(14)-NP_001003713 GeneID:9551 ATP5MF(11)/NP_001003714 GeneID:9551 ATP5MF(14)-NP_0011858…	Intra-Protein							NP_004880	GeneID:9551	ATP5MF(14)	NP_001185808	GeneID:100526740	ATP5MF-PTCD1(11)
												NP_004880	GeneID:9551	ATP5MF(14)	NP_004880	GeneID:9551	ATP5MF(17)
	1	mice-tumour-7-F13-2-ex2_FS-45V.19160.19160.3.0.dta	3	2462.35	7.12891e-08	0.011955	-0.004672	-1.89737	5.4723e-17	1.6261e-10
	2	mice-tumour-7-F13-3-ex2_FS-45V.19266.19266.3.0.dta	3	2462.36	4.26666e-06	0.0255524	-0.002242	-0.91051	1.60534e-26	6.58306e-09
	3	mice-tumour-7-F13-1-ex2_FS-45V.19245.19245.3.0.dta	3	2462.35	1.12568e-07	0.15153	-0.004409	-1.79056	9.20644e-10	7.53196e-10
	4	mice-tumour-7-F13-3-ex2_FS-45V.19300.19300.3.0.dta	3	2462.36	2.78437e-07	0.248022	-0.002242	-0.91051	4.65039e-19	1.11311e-10
85	ASVVPVKDK(7)-KLLEVK(1)	1851.12	Acetyl[ProteinN-term](0)	NP_001185808 GeneID:100526740 ATP5MF-PTCD1(8)-NP_001185808 GeneID:100526740 ATP5MF-PTCD1(11)/NP_001185808 GeneID:100526740 ATP5MF-PTCD1(8)-NP_004880 GeneID:9551 ATP5MF(17)/NP_001185808 GeneID:100526740 ATP5MF-PTCD1(8)-NP_001034267 GeneID:9551 ATP5MF(11)/NP_001185808 GeneID:100526740 ATP5MF-PTCD1(8)-NP_001003714 GeneID:9551 ATP5MF(17)/NP_001185808 GeneID:100526740 ATP5MF-PTCD1(8)-NP_001003713 Gene…	Intra-Protein							NP_001185808	GeneID:100526740	ATP5MF-PTCD1(8)	NP_001185808	GeneID:100526740	ATP5MF-PTCD1(11)
												NP_001185808	GeneID:100526740	ATP5MF-PTCD1(8)	NP_004880	GeneID:9551	ATP5MF(17)
												NP_004880	GeneID:9551	ATP5MF(14)	NP_001185808	GeneID:100526740	ATP5MF-PTCD1(11)
												NP_004880	GeneID:9551	ATP5MF(14)	NP_004880	GeneID:9551	ATP5MF(17)
	1	mice-tumour-7-F11-1-ex2_FS-65v.20849.20849.3.0.dta	3	1851.12	2.4275e-07	0.000138279	0.001615	0.872445	7.55364e-09	2.26926e-07
	2	mice-tumour-7-F11-1-ex2_FS-65v.20892.20892.3.0.dta	3	1851.12	1.17758e-08	0.000223269	0.001615	0.872445	8.11044e-13	6.10801e-09
	3	mice-tumour-7-F11-3-ex2_FS-65v.20668.20668.3.0.dta	3	1851.12	7.33537e-10	0.000352196	-0.003104	-1.67682	1.14224e-10	1.74064e-08
	4	mice-tumour-7-F11-2-ex2_FS-65v.20829.20829.3.0.dta	3	1851.12	7.04035e-05	0.000566827	0.000216	0.116686	5.78971e-10	1.24245e-05
	5	mice-tumour-7-F11-2-ex2_FS-65v.20860.20860.3.0.dta	3	1851.12	1.32347e-07	0.00202641	0.000216	0.116686	2.964e-08	4.4986e-08
	6	mice-tumour-7-F10-2-ex2_FS-65v.21172.21172.3.2.dta	3	1851.12	2.93036e-05	0.00888188	-0.003107	-1.67844	2.41216e-06	5.65958e-06
	7	mice-tumour-7-F10-1-ex2_FS-65v.21262.21262.3.2.dta	3	1851.12	9.94123e-07	0.0251648	3e-06	0.001621	5.28272e-08	7.16239e-08
	8	mice-tumour-7-F10-1-ex2_FS-65v.21276.21276.3.1.dta	3	1851.12	0.00152942	0.0533589	8.2e-05	0.044298	0.00101999	0.00182782
	9	mice-tumour-7-F10-1-ex2_FS-65v.21239.21239.3.4.dta	3	1851.12	0.0134068	0.0598206	-0.000125	-0.067527	0.00553064	0.00809137
	10	mice-tumour-7-F10-3-ex2_FS-65v.21091.21091.3.4.dta	3	1851.12	0.00308244	0.392063	0.00379	2.04741	0.00163387	0.00706016
86	ASWSSLSMDEKVELYR(11)-FKESFAEMNR(2)	3296.56	null	NP_001852 GeneID:1327 COX4I1(78)-NP_001852 GeneID:1327 COX4I1(87)/	Intra-Protein							NP_001852	GeneID:1327	COX4I1(78)	NP_001852	GeneID:1327	COX4I1(87)
	1	mice-tumour-7-F19-2-ex2_FS-65v.25767.25767.4.1.dta	4	3296.56	1.60325e-05	5.47105e-05	-0.00428	-1.29832	1	6.15846e-06
	2	mice-tumour-7-F19-3-ex2_FS-65v.25815.25815.4.1.dta	4	3296.55	1	0.000489303	-0.008142	-2.46985	1	0.00107542
	3	mice-tumour-7-F19-1-ex2_FS-65v.25827.25827.4.0.dta	4	3296.55	1	0.0117501	-0.014357	-4.35515	1	0.0160757
87	ATAEVLNIGKK(10)-LYEGKTK(5)	2161.21	Acetyl[ProteinN-term](0)	NP_001072992 GeneID:10606 PAICS(11)-NP_001072992 GeneID:10606 PAICS(17)/NP_001072992 GeneID:10606 PAICS(11)-NP_001072993 GeneID:10606 PAICS(17)/NP_001072992 GeneID:10606 PAICS(11)-NP_006443 GeneID:10606 PAICS(17)/NP_001072993 GeneID:10606 PAICS(11)-NP_001072992 GeneID:10606 PAICS(17)/NP_001072993 GeneID:10606 PAICS(11)-NP_001072993 GeneID:10606 PAICS(17)/NP_001072993 GeneID:10606 PAICS(11)-NP_006…	Intra-Protein							NP_001072993	GeneID:10606	PAICS(11)	NP_001072993	GeneID:10606	PAICS(17)
	1	mice-tumour-7-F12-2-ex2_FS-45v.18345.18345.3.0.dta	3	2161.2	8.89986e-06	0.321443	-0.007718	-3.57115	2.99573e-09	1.04259e-07
88	ATAVVDGAFKEVK(10)-LSDYKGK(5)	2282.23	null	NP_005800 GeneID:7001 PRDX2(26)-NP_005800 GeneID:7001 PRDX2(34)/	Intra-Protein							NP_005800	GeneID:7001	PRDX2(26)	NP_005800	GeneID:7001	PRDX2(34)
	1	mice-tumour-7-F14-2-ex2_FS-65V.14610.14610.4.0.dta	4	2282.23	0.210251	0.0188114	0.000663	0.290506	7.34667e-05	0.340097
89	ATDILPKWLR(7)-KVLIQTK(1)	2179.32	null	NP_057376 GeneID:10131 TRAP1(382)-NP_057376 GeneID:10131 TRAP1(369)/NP_057376 GeneID:10131 TRAP1(382)-NP_001258978 GeneID:10131 TRAP1(316)/NP_001258978 GeneID:10131 TRAP1(329)-NP_057376 GeneID:10131 TRAP1(369)/NP_001258978 GeneID:10131 TRAP1(329)-NP_001258978 GeneID:10131 TRAP1(316)/	Intra-Protein							NP_001258978	GeneID:10131	TRAP1(329)	NP_001258978	GeneID:10131	TRAP1(316)
	1	mice-tumour-7-F13-3-ex2_FS-65V.25235.25235.3.0.dta	3	2179.32	0.000120804	0.000940282	-0.004927	-2.2608	1.92815e-08	5.89742e-06
	2	mice-tumour-7-F13-3-ex2_FS-45V.24091.24091.4.1.dta	4	2179.31	0.00228089	0.265833	-0.006289	-2.88576	0.00065338	0.000998363
	3	mice-tumour-7-F13-3-ex2_FS-45V.24051.24051.4.0.dta	4	2179.32	0.0026498	0.288644	-0.004211	-1.93225	0.00245588	0.000511645
90	ATEKQHITLALEK(4)-QKLEEK(2)	2393.33	null	NP_001093640 GeneID:10989 IMMT(416)-NP_001093640 GeneID:10989 IMMT(427)/NP_001093640 GeneID:10989 IMMT(416)-NP_006830 GeneID:10989 IMMT(438)/NP_001093640 GeneID:10989 IMMT(416)-NP_001093639 GeneID:10989 IMMT(437)/NP_006830 GeneID:10989 IMMT(427)-NP_001093640 GeneID:10989 IMMT(427)/NP_006830 GeneID:10989 IMMT(427)-NP_006830 GeneID:10989 IMMT(438)/NP_006830 GeneID:10989 IMMT(427)-NP_001093639 GeneI…	Intra-Protein							NP_006830	GeneID:10989	IMMT(427)	NP_006830	GeneID:10989	IMMT(438)
	1	mice-tumour-7-F16-3-ex2_FS-45v.10088.10088.5.0.dta	5	2393.33	0.0495316	0.00274149	-0.000178	-0.074373	0.0200579	0.121478
	2	mice-tumour-7-F16-3-ex2_FS-45v.10066.10066.5.0.dta	5	2393.33	0.165513	0.0147284	-0.000178	-0.074373	0.00150294	0.129877
	3	mice-tumour-7-F16-2-ex2_FS-45v.9995.9995.5.0.dta	5	2393.32	0.169842	0.0284131	-0.004998	-2.08831	0.0496992	0.0958209
	4	mice-tumour-7-F16-1-ex2_FS-45v.10080.10080.5.0.dta	5	2393.33	0.760443	0.119456	-0.001951	-0.815183	0.0405444	0.777853
	5	mice-tumour-7-F16-1-ex2_FS-45v.10048.10048.5.0.dta	5	2393.33	0.901546	0.245242	-0.001951	-0.815183	0.0441788	0.920861
	6	mice-tumour-7-F16-2-ex2_FS-45v.9967.9967.5.0.dta	5	2393.32	1	0.345194	-0.005098	-2.13009	0.0428971	1
91	ATGKLIAQGR(4)-HTKHLGN(3)	1958.09	null	NP_001153566 GeneID:55856 ACOT13(104)-NP_001153566 GeneID:55856 ACOT13(113)/NP_001153566 GeneID:55856 ACOT13(104)-NP_060943 GeneID:55856 ACOT13(136)/NP_060943 GeneID:55856 ACOT13(127)-NP_001153566 GeneID:55856 ACOT13(113)/NP_060943 GeneID:55856 ACOT13(127)-NP_060943 GeneID:55856 ACOT13(136)/	Intra-Protein							NP_060943	GeneID:55856	ACOT13(127)	NP_060943	GeneID:55856	ACOT13(136)
	1	mice-tumour-7-F16-1-ex2_FS-65v.5277.5277.3.0.dta	3	1958.09	7.26129e-07	0.0100862	-0.002229	-1.13835	0.00474302	4.59312e-09
	2	mice-tumour-7-F16-1-ex2_FS-65v.5268.5268.4.2.dta	4	1958.09	0.183107	0.287205	-0.002098	-1.07145	0.00491898	0.346671
92	ATLKEK(1)-EAASKR(5)	1487.84	null	NP_002291 GeneID:3945 LDHB(2)-NP_001229696 GeneID:25902 MTHFD1L(852)/NP_002291 GeneID:3945 LDHB(2)-NP_056255 GeneID:25902 MTHFD1L(851)/NP_002291 GeneID:3945 LDHB(2)-NP_001229697 GeneID:25902 MTHFD1L(786)/NP_001167568 GeneID:3945 LDHB(2)-NP_001229696 GeneID:25902 MTHFD1L(852)/NP_001167568 GeneID:3945 LDHB(2)-NP_056255 GeneID:25902 MTHFD1L(851)/NP_001167568 GeneID:3945 LDHB(2)-NP_001229697 GeneID:2…	Inter-Protein							NP_002291	GeneID:3945	LDHB(2)	NP_001229696	GeneID:25902	MTHFD1L(852)
	1	mice-tumour-7-F7-3-ex2_FS-65v.13498.13498.3.1.dta	3	1487.84	0.00768553	0.12904	0.000623	0.418727	0.0309971	0.0151098
93	ATPEQYQILKENYGQK(10)-EAEKVAR(4)	2849.47	null	NP_001129294 GeneID:2224 FDPS(287)-NP_001129294 GeneID:2224 FDPS(297)/NP_001129294 GeneID:2224 FDPS(287)-NP_001229753 GeneID:2224 FDPS(297)/NP_001129294 GeneID:2224 FDPS(287)-NP_001995 GeneID:2224 FDPS(363)/NP_001129294 GeneID:2224 FDPS(287)-NP_001129293 GeneID:2224 FDPS(363)/NP_001129294 GeneID:2224 FDPS(287)-NP_001229754 GeneID:2224 FDPS(192)/NP_001229753 GeneID:2224 FDPS(287)-NP_001129294 Gene…	Intra-Protein							NP_001229754	GeneID:2224	FDPS(182)	NP_001229754	GeneID:2224	FDPS(192)
	1	mice-tumour-7-F16-3-ex2_FS-45v.12129.12129.3.1.dta	3	2849.46	0.00424689	0.377886	-0.007907	-2.7749	0.00599322	0.0014443
94	AVDEAADALLKAK(11)-EELEKMK(5)	2358.25	null	NP_001093640 GeneID:10989 IMMT(286)-NP_001093640 GeneID:10989 IMMT(293)/NP_001093640 GeneID:10989 IMMT(286)-NP_006830 GeneID:10989 IMMT(304)/NP_001093640 GeneID:10989 IMMT(286)-NP_001093639 GeneID:10989 IMMT(303)/NP_006830 GeneID:10989 IMMT(297)-NP_001093640 GeneID:10989 IMMT(293)/NP_006830 GeneID:10989 IMMT(297)-NP_006830 GeneID:10989 IMMT(304)/NP_006830 GeneID:10989 IMMT(297)-NP_001093639 GeneI…	Intra-Protein							NP_006830	GeneID:10989	IMMT(297)	NP_006830	GeneID:10989	IMMT(304)
	1	mice-tumour-7-F20-3-ex2_FS-65v.17793.17793.4.1.dta	4	2358.24	0.630691	0.0202564	-0.002143	-0.908726	0.0149272	0.33467
	2	mice-tumour-7-F20-3-ex2_FS-65v.17725.17725.4.1.dta	4	2358.24	0.00474369	0.110197	-0.003588	-1.52147	2.50179e-06	0.00324809
95	AVDEAADALLKAK(11)-TVEGALKER(7)	2454.34	null	NP_001093640 GeneID:10989 IMMT(286)-NP_001093640 GeneID:10989 IMMT(271)/NP_001093640 GeneID:10989 IMMT(286)-NP_006830 GeneID:10989 IMMT(282)/NP_001093640 GeneID:10989 IMMT(286)-NP_001093639 GeneID:10989 IMMT(281)/NP_006830 GeneID:10989 IMMT(297)-NP_001093640 GeneID:10989 IMMT(271)/NP_006830 GeneID:10989 IMMT(297)-NP_006830 GeneID:10989 IMMT(282)/NP_006830 GeneID:10989 IMMT(297)-NP_001093639 GeneI…	Intra-Protein							NP_006830	GeneID:10989	IMMT(297)	NP_006830	GeneID:10989	IMMT(282)
	1	mice-tumour-7-F18-1-ex2_FS-65v.17957.17957.4.0.dta	4	2454.34	0.0353981	0.0193262	-0.006959	-2.83538	0.00661217	0.176955
	2	mice-tumour-7-F18-2-ex2_FS-65v.17767.17767.4.0.dta	4	2454.34	0.189609	0.0298192	-0.00655	-2.66874	0.00551875	0.187839
	3	mice-tumour-7-F18-1-ex2_FS-45v.16655.16655.3.1.dta	3	2454.34	0.110244	0.202399	-0.00128	-0.521524	0.0102588	0.125631
	4	mice-tumour-7-F18-3-ex2_FS-65v.17840.17840.4.0.dta	4	2454.34	0.0413571	0.305675	-0.007447	-3.03421	0.000767887	0.0693181
96	AVEDKNIGPLVK(5)-FLEGKR(5)	2169.23	null	NP_001186913 GeneID:4719 NDUFS1(177)-NP_001186913 GeneID:4719 NDUFS1(171)/NP_001186913 GeneID:4719 NDUFS1(177)-NP_001186911 GeneID:4719 NDUFS1(46)/NP_001186913 GeneID:4719 NDUFS1(177)-NP_004997 GeneID:4719 NDUFS1(157)/NP_001186913 GeneID:4719 NDUFS1(177)-NP_001186912 GeneID:4719 NDUFS1(100)/NP_001186913 GeneID:4719 NDUFS1(177)-NP_001186910 GeneID:4719 NDUFS1(121)/NP_001186911 GeneID:4719 NDUFS1(5…	Intra-Protein							NP_001186913	GeneID:4719	NDUFS1(177)	NP_001186913	GeneID:4719	NDUFS1(171)
	1	mice-tumour-7-F14-2-ex2_FS-65V.17595.17595.3.0.dta	3	2169.22	5.23179e-06	0.00297059	-0.004411	-2.03344	2.30707e-12	1.15619e-06
	2	mice-tumour-7-F14-3-ex2_FS-65V.17511.17511.3.0.dta	3	2169.22	0.000361692	0.106511	-0.002938	-1.3544	2.79222e-05	6.80652e-05
	3	mice-tumour-7-F14-1-ex2_FS-65V.17651.17651.4.0.dta	4	2169.22	0.0382097	0.401755	-0.003343	-1.5411	4.99895e-05	0.136441
97	AVFGMGCFWGAER(1)-SDEWFAKHNKPK(7)	3111.46	Carbamidomethyl[C](7)	NP_001186658 GeneID:4482 MSRA(2)-NP_057164 GeneID:51031 GLOD4(290)/	Inter-Protein							NP_001186658	GeneID:4482	MSRA(2)	NP_057164	GeneID:51031	GLOD4(290)
	1	mice-tumour-7-F4-2-ex2_FS-65V.9292.9292.5.2.dta	5	3111.46	1	0.439501	-0.004847	-1.55779	1	1
98	AVPPTYADLGKSAR(11)-DVFTKGYGFGLIK(5)	3069.63	Acetyl[ProteinN-term](0)	NP_003365 GeneID:7416 VDAC1(12)-NP_003365 GeneID:7416 VDAC1(20)/	Intra-Protein							NP_003365	GeneID:7416	VDAC1(12)	NP_003365	GeneID:7416	VDAC1(20)
	1	mice-tumour-7-F16-1-ex2_FS-45v.29107.29107.3.0.dta	3	3069.63	4.8163e-10	0.0694525	-0.002872	-0.935618	3.15371e-06	3.96695e-10
	2	mice-tumour-7-F16-3-ex2_FS-65v.31500.31500.4.0.dta	4	3069.62	0.00216607	0.133046	-0.005336	-1.73832	0.0688772	3.68127e-07
	3	mice-tumour-7-F16-2-ex2_FS-45v.29195.29195.3.0.dta	3	3069.63	0.000520427	0.139176	-0.000191	-0.062222	0.000214813	4.30101e-05
99	AVPPTYADLGKSAR(11)-LDLKTK(4)	2342.3	Acetyl[ProteinN-term](0)	NP_003365 GeneID:7416 VDAC1(12)-NP_003365 GeneID:7416 VDAC1(32)/	Intra-Protein							NP_003365	GeneID:7416	VDAC1(12)	NP_003365	GeneID:7416	VDAC1(32)
	1	mice-tumour-7-F10-3-ex2_FS-45v.20123.20123.3.0.dta	3	2342.29	0.00049434	0.57734	-0.009086	-3.8791	0.00449708	0.000624048
100	AVVDKVFFSR(5)-MAAFSK(1)	1959.04	null	NP_001116146 GeneID:5825 ABCD3(61)-NP_001116146 GeneID:5825 ABCD3(1)/NP_001116146 GeneID:5825 ABCD3(61)-NP_002849 GeneID:5825 ABCD3(1)/NP_002849 GeneID:5825 ABCD3(61)-NP_001116146 GeneID:5825 ABCD3(1)/NP_002849 GeneID:5825 ABCD3(61)-NP_002849 GeneID:5825 ABCD3(1)/	Intra-Protein							NP_002849	GeneID:5825	ABCD3(61)	NP_002849	GeneID:5825	ABCD3(1)
	1	mice-tumour-7-F5-3-ex2_FS-45v.24386.24386.3.0.dta	3	1959.02	1	0.607226	-0.015847	-8.08916	0.100403	1
101	AYRKNVLAK(4)-DKAHSIGK(2)	2055.17	null	NP_068746 GeneID:60558 GUF1(618)-NP_068746 GeneID:60558 GUF1(574)/	Intra-Protein							NP_068746	GeneID:60558	GUF1(618)	NP_068746	GeneID:60558	GUF1(574)
	1	mice-tumour-7-F10-2-ex2_FS-65v.27566.27566.3.0.dta	3	2055.15	1	0.183198	-0.015946	-7.75897	1	0.0256251
102	CDKAEADPEK(3)-KRSILR(1)	2072.08	Carbamidomethyl[C](1)	NP_002444 GeneID:4528 MTIF2(292)-NP_002444 GeneID:4528 MTIF2(488)/NP_002444 GeneID:4528 MTIF2(292)-NP_001005369 GeneID:4528 MTIF2(488)/NP_001005369 GeneID:4528 MTIF2(292)-NP_002444 GeneID:4528 MTIF2(488)/NP_001005369 GeneID:4528 MTIF2(292)-NP_001005369 GeneID:4528 MTIF2(488)/	Intra-Protein							NP_002444	GeneID:4528	MTIF2(292)	NP_002444	GeneID:4528	MTIF2(488)
	1	mice-tumour-7-F1-1-ex2_FS-65v.24197.24197.3.2.dta	3	2072.08	1	0.263484	-0.005237	-2.52741	1	1
103	CDKAEADPEKVK(3)-CDKAEADPEK(3)	2689.23	Carbamidomethyl[C](1);Carbamidomethyl[C](16)	NP_002444 GeneID:4528 MTIF2(292)-NP_002444 GeneID:4528 MTIF2(292)/NP_002444 GeneID:4528 MTIF2(292)-NP_001005369 GeneID:4528 MTIF2(292)/NP_001005369 GeneID:4528 MTIF2(292)-NP_002444 GeneID:4528 MTIF2(292)/NP_001005369 GeneID:4528 MTIF2(292)-NP_001005369 GeneID:4528 MTIF2(292)/	Intra-Protein							NP_002444	GeneID:4528	MTIF2(292)	NP_002444	GeneID:4528	MTIF2(292)
	1	mice-tumour-7-F1-3-ex2_FS-45V.20481.20481.3.0.dta	3	2689.23	1	0.225746	-0.003138	-1.16688	1	1
104	CGAHYKLVPQQLAH(6)-EDPNLVPSISNKR(12)	3227.66	Carbamidomethyl[C](1)	NP_001853 GeneID:1329 COX5B(121)-NP_001853 GeneID:1329 COX5B(86)/	Intra-Protein							NP_001853	GeneID:1329	COX5B(121)	NP_001853	GeneID:1329	COX5B(86)
	1	mice-tumour-7-F11-2-ex2_FS-45v.18451.18451.4.0.dta	4	3227.66	8.47218e-06	7.16526e-05	-0.001771	-0.548694	3.34404e-10	0.000367601
	2	mice-tumour-7-F12-1-ex2_FS-45v.18369.18369.4.0.dta	4	3227.66	0.000104456	0.000373959	-0.00443	-1.37251	1.63775e-10	5.90552e-07
	3	mice-tumour-7-F11-3-ex2_FS-45v.18389.18389.4.0.dta	4	3227.66	0.00295238	0.000983528	-0.001371	-0.424766	2.60102e-07	0.00264711
	4	mice-tumour-7-F11-3-ex2_FS-45v.18375.18375.4.0.dta	4	3227.66	0.00136552	0.00100923	-0.001371	-0.424766	5.38636e-07	0.0060386
	5	mice-tumour-7-F12-3-ex2_FS-45V.18086.18086.4.0.dta	4	3227.65	0.00379247	0.00213997	-0.007916	-2.45255	6.58671e-14	5.97405e-06
	6	mice-tumour-7-F12-2-ex2_FS-45v.18432.18432.4.0.dta	4	3227.66	0.00598401	0.0238519	-0.007126	-2.20779	3.37289e-14	0.000227747
	7	mice-tumour-7-F11-1-ex2_FS-45v.18389.18389.4.3.dta	4	3227.66	0.138188	0.149073	-0.007433	-2.3029	4.59223e-07	0.0218122
105	CGFRKAPR(5)-LLPAPALR(1)	1979.14	Carbamidomethyl[C](1)	NP_061092 GeneID:55486 PARL(55)-NP_003739 GeneID:8659 ALDH4A1(2)/NP_061092 GeneID:55486 PARL(55)-NP_733844 GeneID:8659 ALDH4A1(2)/NP_001032728 GeneID:55486 PARL(55)-NP_003739 GeneID:8659 ALDH4A1(2)/NP_001032728 GeneID:55486 PARL(55)-NP_733844 GeneID:8659 ALDH4A1(2)/	Inter-Protein							NP_061092	GeneID:55486	PARL(55)	NP_003739	GeneID:8659	ALDH4A1(2)
	1	mice-tumour-7-F15-1-ex2_FS-65V.19952.19952.4.0.dta	4	1979.14	1	0.427478	0.002285	1.15454	1	0.0199458
106	CIADLKLLAK(6)-KAQAQPVM(1)	2154.2	Carbamidomethyl[C](1)	NP_001679 GeneID:515 ATP5PB(244)-NP_001679 GeneID:515 ATP5PB(249)/	Intra-Protein							NP_001679	GeneID:515	ATP5PB(244)	NP_001679	GeneID:515	ATP5PB(249)
	1	mice-tumour-7-F11-1-ex2_FS-45v.23153.23153.3.0.dta	3	2154.2	0.00088029	0.00205763	-0.002539	-1.17863	3.13323e-05	0.00166888
	2	mice-tumour-7-F11-3-ex2_FS-45v.23192.23192.3.0.dta	3	2154.2	0.000635932	0.020621	-0.002628	-1.21994	8.335e-07	0.000742502
	3	mice-tumour-7-F12-3-ex2_FS-45V.22882.22882.3.0.dta	3	2154.2	0.000385084	0.0233345	-0.001165	-0.540803	2.35503e-06	0.000426962
	4	mice-tumour-7-F11-2-ex2_FS-45v.23254.23254.3.0.dta	3	2154.2	0.000570243	0.0301651	-0.007107	-3.29913	1.58105e-05	0.00177377
	5	mice-tumour-7-F12-1-ex2_FS-45v.23272.23272.3.0.dta	3	2154.2	5.73326e-05	0.0403371	-0.001635	-0.758982	4.09091e-06	0.0321349
107	CIGKPGGSLDNSEQK(4)-MTDKCFR(4)	2684.25	Carbamidomethyl[C](1);Carbamidomethyl[C](23)	NP_036590 GeneID:26517 TIMM13(53)-NP_036590 GeneID:26517 TIMM13(45)/	Intra-Protein							NP_036590	GeneID:26517	TIMM13(53)	NP_036590	GeneID:26517	TIMM13(45)
	1	mice-tumour-7-F11-1-ex2_FS-45v.10891.10891.4.1.dta	4	2684.24	0.190895	0.24655	-0.007967	-2.96806	0.147256	0.118469
	2	mice-tumour-7-F11-2-ex2_FS-45v.10915.10915.4.1.dta	4	2684.24	0.48397	0.29404	-0.007854	-2.92596	0.850906	0.206868
108	CIPALDSLTPANEDQKIGIEIIK(16)-EGFEKISK(5)	3612.91	Carbamidomethyl[C](1)	NP_002147 GeneID:3329 HSPD1(462)-NP_002147 GeneID:3329 HSPD1(130)/NP_002147 GeneID:3329 HSPD1(462)-NP_955472 GeneID:3329 HSPD1(130)/NP_955472 GeneID:3329 HSPD1(462)-NP_002147 GeneID:3329 HSPD1(130)/NP_955472 GeneID:3329 HSPD1(462)-NP_955472 GeneID:3329 HSPD1(130)/	Intra-Protein							NP_002147	GeneID:3329	HSPD1(462)	NP_002147	GeneID:3329	HSPD1(130)
	1	mice-tumour-7-F20-2-ex2_FS-45v.27970.27970.4.0.dta	4	3612.91	0.00769321	0.0111021	-0.000278	-0.076946	6.03054e-08	0.00595686
	2	mice-tumour-7-F20-3-ex2_FS-45v.27973.27973.4.0.dta	4	3612.91	0.152622	0.0324041	-0.001008	-0.279	1.07459e-06	0.252125
	3	mice-tumour-7-F20-1-ex2_FS-45v.28036.28036.4.0.dta	4	3612.91	0.0609979	0.156904	0.000837	0.231669	8.18623e-11	0.0590122
	4	mice-tumour-7-F20-1-ex2_FS-45v.28026.28026.4.0.dta	4	3612.91	0.485986	0.182293	0.000837	0.231669	0.00025113	0.499576
	5	mice-tumour-7-F1-2-ex2_FS-45V.28333.28333.4.1.dta	4	3612.93	0.74603	0.239275	0.019775	5.47343	0.000807538	1
	6	mice-tumour-7-F1-1-ex2_FS-45.28345.28345.4.3.dta	4	3612.92	0.728454	0.314337	0.013968	3.86614	0.000453465	1
109	CIPALDSLTPANEDQKIGIEIIK(16)-TLKIPAMTIAK(3)	3862.13	Carbamidomethyl[C](1)	NP_002147 GeneID:3329 HSPD1(462)-NP_002147 GeneID:3329 HSPD1(473)/NP_002147 GeneID:3329 HSPD1(462)-NP_955472 GeneID:3329 HSPD1(473)/NP_955472 GeneID:3329 HSPD1(462)-NP_002147 GeneID:3329 HSPD1(473)/NP_955472 GeneID:3329 HSPD1(462)-NP_955472 GeneID:3329 HSPD1(473)/	Intra-Protein							NP_002147	GeneID:3329	HSPD1(462)	NP_002147	GeneID:3329	HSPD1(473)
	1	mice-tumour-7-F19-3-ex2_FS-45v.29480.29480.4.0.dta	4	3862.13	7.3613e-06	0.0058056	0.002774	0.718256	3.705e-06	1.20729e-05
	2	mice-tumour-7-F19-1-ex2_FS-45v.29447.29447.4.0.dta	4	3862.13	4.15078e-05	0.0501127	-0.005173	-1.33942	0.0166708	5.69691e-05
110	CKSQFTITPGSEQIR(2)-SAAVAKQALAHGLK(6)	3253.74	Carbamidomethyl[C](1)	NP_001089 GeneID:50 ACO2(411)-NP_001089 GeneID:50 ACO2(401)/	Intra-Protein							NP_001089	GeneID:50	ACO2(411)	NP_001089	GeneID:50	ACO2(401)
	1	mice-tumour-7-F7-2-ex2_FS-45V.15859.15859.5.0.dta	5	3253.73	0.0679246	0.0123229	-0.006932	-2.13047	0.00274005	0.0332848
	2	mice-tumour-7-F7-3-ex2_FS-45V.16058.16058.5.0.dta	5	3253.74	0.000279625	0.262099	0.003376	1.03758	0.292401	0.120654
111	CLDGVLIDGNDKGISK(12)-KCVPPHYKEAELSK(8)	3526.79	Carbamidomethyl[C](1);Carbamidomethyl[C](21)	NP_714917 GeneID:133383 SETD9(189)-NP_036588 GeneID:26519 TIMM10(39)/NP_001165461 GeneID:133383 SETD9(189)-NP_036588 GeneID:26519 TIMM10(39)/	Inter-Protein							NP_714917	GeneID:133383	SETD9(189)	NP_036588	GeneID:26519	TIMM10(39)
	1	mice-tumour-7-F5-3-ex2_FS-45v.17291.17291.6.2.dta	6	3526.79	0.961899	0.326375	-0.00675	-1.91392	0.382027	0.907779
112	CMDKPGPK(4)-AVAEGKR(6)	1799.91	Carbamidomethyl[C](1)	NP_004076 GeneID:1678 TIMM8A(50)-NP_001035997 GeneID:80347 COASY(493)/NP_004076 GeneID:1678 TIMM8A(50)-NP_001035994 GeneID:80347 COASY(464)/NP_004076 GeneID:1678 TIMM8A(50)-NP_079509 GeneID:80347 COASY(464)/	Inter-Protein							NP_004076	GeneID:1678	TIMM8A(50)	NP_001035997	GeneID:80347	COASY(493)
	1	mice-tumour-7-F18-1-ex2_FS-45v.27654.27654.2.0.dta	2	1799.91	0.837524	0.527442	8e-06	0.004445	1	0.00996048
113	CNTPTYCDLGKAAK(11)-LKASYK(2)	2487.23	Carbamidomethyl[C](1);Carbamidomethyl[C](7);Acetyl[ProteinN-term](0)	NP_005653 GeneID:7419 VDAC3(12)-NP_005653 GeneID:7419 VDAC3(115)/NP_005653 GeneID:7419 VDAC3(12)-NP_001129166 GeneID:7419 VDAC3(116)/NP_001129166 GeneID:7419 VDAC3(12)-NP_005653 GeneID:7419 VDAC3(115)/NP_001129166 GeneID:7419 VDAC3(12)-NP_001129166 GeneID:7419 VDAC3(116)/	Intra-Protein							NP_005653	GeneID:7419	VDAC3(12)	NP_005653	GeneID:7419	VDAC3(115)
	1	mice-tumour-7-F8-2-ex2_FS45V.11391.11391.3.0.dta	3	2487.22	5.37252e-05	0.00110948	-0.004659	-1.87317	1	0.000447654
	2	mice-tumour-7-F8-1-ex2_FS-45V.11513.11513.3.1.dta	3	2487.22	7.74474e-06	0.0234689	-0.003197	-1.28537	6.57513e-05	3.3311e-05
114	CTANDLKCIIR(7)-LIKHDLK(3)	2367.29	Carbamidomethyl[C](1);Carbamidomethyl[C](8)	NP_002302 GeneID:3980 LIG3(410)-NP_002302 GeneID:3980 LIG3(417)/NP_002302 GeneID:3980 LIG3(410)-NP_039269 GeneID:3980 LIG3(417)/NP_039269 GeneID:3980 LIG3(410)-NP_002302 GeneID:3980 LIG3(417)/NP_039269 GeneID:3980 LIG3(410)-NP_039269 GeneID:3980 LIG3(417)/	Intra-Protein							NP_002302	GeneID:3980	LIG3(410)	NP_002302	GeneID:3980	LIG3(417)
	1	mice-tumour-7-F11-3-ex2_FS-65v.16569.16569.4.1.dta	4	2367.28	1.86558e-07	1.7305e-05	-0.004631	-1.95625	1.39714e-09	4.66143e-08
	2	mice-tumour-7-F11-1-ex2_FS-65v.16764.16764.4.1.dta	4	2367.28	1.35949e-06	2.1385e-05	-0.006347	-2.68113	8.64389e-11	9.51689e-08
	3	mice-tumour-7-F11-2-ex2_FS-65v.16698.16698.4.0.dta	4	2367.28	2.06149e-06	5.86825e-05	-0.004914	-2.07579	2.29492e-10	6.4552e-07
	4	mice-tumour-7-F11-1-ex2_FS-65v.16794.16794.4.1.dta	4	2367.28	0.000374783	0.0201815	-0.006347	-2.68113	0.000923872	0.001565
	5	mice-tumour-7-F11-3-ex2_FS-45v.15207.15207.3.1.dta	3	2367.29	0.00082967	0.114272	-0.000216	-0.091244	3.34067e-06	0.000675918
115	DADVQNFVSFISKDSIQK(13)-KATASR(1)	2811.45	null	NP_001171500 GeneID:1632 ECI1(266)-NP_001171500 GeneID:1632 ECI1(243)/NP_001171500 GeneID:1632 ECI1(266)-NP_001910 GeneID:1632 ECI1(260)/NP_001910 GeneID:1632 ECI1(283)-NP_001171500 GeneID:1632 ECI1(243)/NP_001910 GeneID:1632 ECI1(283)-NP_001910 GeneID:1632 ECI1(260)/	Intra-Protein							NP_001171500	GeneID:1632	ECI1(266)	NP_001171500	GeneID:1632	ECI1(243)
	1	mice-tumour-7-F14-1-ex2_FS-45V.24994.24994.3.0.dta	3	2811.44	2.14017e-10	9.28948e-05	-0.007243	-2.57625	2.60258e-15	5.74196e-09
	2	mice-tumour-7-F14-2-ex2_FS-65V.26333.26333.4.2.dta	4	2811.45	0.0262316	0.00324629	-0.005765	-2.05054	7.74297e-07	0.00346753
	3	mice-tumour-7-F14-3-ex2_FS-45V.24913.24913.3.0.dta	3	2811.45	4.06352e-09	0.0205269	-0.003799	-1.35126	1.08244e-23	1.13742e-08
116	DAGVKVSK(5)-MTVFFK(1)	1712.93	null	NP_060708 GeneID:55750 AGK(220)-NP_060708 GeneID:55750 AGK(1)/	Intra-Protein							NP_060708	GeneID:55750	AGK(220)	NP_060708	GeneID:55750	AGK(1)
	1	mice-tumour-7-F7-1-ex2_FS-65V.17072.17072.3.0.dta	3	1712.94	1	0.36738	0.008982	5.24365	0.279016	1
117	DATSKVALVYGQMNEPPGAR(5)-VVDLLAPYAKGGK(10)	3571.88	null	NP_001677 GeneID:506 ATP5F1B(264)-NP_001677 GeneID:506 ATP5F1B(198)/	Intra-Protein							NP_001677	GeneID:506	ATP5F1B(264)	NP_001677	GeneID:506	ATP5F1B(198)
	1	mice-tumour-7-F18-2-ex2_FS-45v.28314.28314.4.1.dta	4	3571.88	0.000225915	0.00948231	-0.001907	-0.533892	0.000556569	8.32812e-05
118	DDAMLLKGK(7)-AQIEKR(5)	1872.03	null	NP_002147 GeneID:3329 HSPD1(359)-NP_002147 GeneID:3329 HSPD1(369)/NP_002147 GeneID:3329 HSPD1(359)-NP_955472 GeneID:3329 HSPD1(369)/NP_955472 GeneID:3329 HSPD1(359)-NP_002147 GeneID:3329 HSPD1(369)/NP_955472 GeneID:3329 HSPD1(359)-NP_955472 GeneID:3329 HSPD1(369)/	Intra-Protein							NP_002147	GeneID:3329	HSPD1(359)	NP_002147	GeneID:3329	HSPD1(369)
	1	mice-tumour-7-F11-2-ex2_FS-65v.13252.13252.3.0.dta	3	1872.02	8.59248e-15	3.34107e-05	-0.003721	-1.98769	3.84851e-22	2.08025e-14
	2	mice-tumour-7-F11-3-ex2_FS-65v.13070.13070.3.0.dta	3	1872.02	5.72358e-07	0.00229496	-0.005151	-2.75156	3.50979e-13	1.6896e-06
	3	mice-tumour-7-F10-3-ex2_FS-65v.13172.13172.4.0.dta	4	1872.02	1	0.0206766	-0.001065	-0.568902	3.33694e-05	1
	4	mice-tumour-7-F10-1-ex2_FS-65v.13384.13384.4.0.dta	4	1872.02	1	0.151654	-0.001531	-0.817831	5.24345e-07	1
119	DDAMLLKGK(7)-GDKAQIEK(3)	2016.07	null	NP_002147 GeneID:3329 HSPD1(359)-NP_002147 GeneID:3329 HSPD1(364)/NP_002147 GeneID:3329 HSPD1(359)-NP_955472 GeneID:3329 HSPD1(364)/NP_955472 GeneID:3329 HSPD1(359)-NP_002147 GeneID:3329 HSPD1(364)/NP_955472 GeneID:3329 HSPD1(359)-NP_955472 GeneID:3329 HSPD1(364)/	Intra-Protein							NP_002147	GeneID:3329	HSPD1(359)	NP_002147	GeneID:3329	HSPD1(364)
	1	mice-tumour-7-F16-2-ex2_FS-65v.13018.13018.4.0.dta	4	2016.06	5.23338e-09	3.99435e-08	-0.00418	-2.07334	2.21418e-12	9.03489e-11
	2	mice-tumour-7-F16-1-ex2_FS-65v.13058.13058.4.0.dta	4	2016.06	1.91121e-11	0.000211241	-0.004177	-2.07185	1.12068e-09	2.48181e-12
	3	mice-tumour-7-F16-3-ex2_FS-65v.13016.13016.4.0.dta	4	2016.06	7.91655e-07	0.000579515	-0.003268	-1.62098	1.40263e-05	8.16314e-07
	4	mice-tumour-7-F17-2-ex2_FS-65v.12485.12485.4.0.dta	4	2016.07	7.22258e-05	0.00261613	-0.003003	-1.48953	9.69157e-07	7.34239e-05
	5	mice-tumour-7-F17-3-ex2_FS-65v.12425.12425.3.1.dta	3	2016.07	3.59949e-05	0.0250227	-0.003067	-1.52128	1.64661e-06	2.15499e-05
	6	mice-tumour-7-F18-3-ex2_FS-65v.12826.12826.3.1.dta	3	2016.05	4.32512e-06	0.0304195	-0.013276	-6.58509	1.7551e-13	1.10808e-06
	7	mice-tumour-7-F17-3-ex2_FS-65v.12446.12446.4.0.dta	4	2016.06	1.1161e-05	0.0335371	-0.004143	-2.05499	9.39869e-09	3.83225e-07
	8	mice-tumour-7-F17-1-ex2_FS-65v.12374.12374.3.2.dta	3	2016.06	2.47909e-10	0.0347244	-0.003858	-1.91363	4.01328e-12	3.41486e-10
	9	mice-tumour-7-F17-1-ex2_FS-65v.12390.12390.3.2.dta	3	2016.06	4.78803e-11	0.0442137	-0.003858	-1.91363	1.65108e-12	9.09535e-11
	10	mice-tumour-7-F18-2-ex2_FS-65v.12761.12761.3.0.dta	3	2016.05	0.00136359	0.048777	-0.013953	-6.9209	3.4574e-07	0.000499682
	11	mice-tumour-7-F16-3-ex2_FS-65v.10215.10215.4.0.dta	4	2032.06	0.000133334	0.0553196	-0.003531	-1.73764	0.000202398	7.96375e-05
	12	mice-tumour-7-F17-1-ex2_FS-65v.12369.12369.4.0.dta	4	2016.06	3.41675e-05	0.0649562	-0.00386	-1.91462	1.10705e-06	1.14328e-05
	13	mice-tumour-7-F16-1-ex2_FS-65v.10283.10283.4.0.dta	4	2032.06	4.49956e-05	0.0773828	-0.004328	-2.12986	6.1661e-05	1.18995e-05
	14	mice-tumour-7-F18-3-ex2_FS-65v.12828.12828.3.2.dta	3	2016.05	0.00555937	0.279059	-0.013276	-6.58509	9.66942e-06	0.0259596
	15	mice-tumour-7-F18-1-ex2_FS-65v.12906.12906.3.1.dta	3	2016.06	3.19259e-05	0.300837	-0.009233	-4.57971	0.00410377	2.40386e-05
	16	mice-tumour-7-F17-1-ex2_FS-65v.12388.12388.4.0.dta	4	2016.06	7.41448e-05	0.314003	-0.003843	-1.90619	0.000498525	2.52674e-05
120	DDAMLLKGK(7)-GVITVKDGK(6)	2044.14	null	NP_002147 GeneID:3329 HSPD1(359)-NP_002147 GeneID:3329 HSPD1(202)/NP_002147 GeneID:3329 HSPD1(359)-NP_955472 GeneID:3329 HSPD1(202)/NP_955472 GeneID:3329 HSPD1(359)-NP_002147 GeneID:3329 HSPD1(202)/NP_955472 GeneID:3329 HSPD1(359)-NP_955472 GeneID:3329 HSPD1(202)/	Intra-Protein							NP_002147	GeneID:3329	HSPD1(359)	NP_002147	GeneID:3329	HSPD1(202)
	1	mice-tumour-7-F14-2-ex2_FS-65V.17940.17940.4.0.dta	4	2044.13	1	0.0804321	-0.00293	-1.43337	0.0517356	1
	2	mice-tumour-7-F14-3-ex2_FS-65V.17874.17874.3.1.dta	3	2044.13	0.0055796	0.11733	-0.00409	-2.00085	0.000655069	0.00578991
	3	mice-tumour-7-F14-3-ex2_FS-65V.17841.17841.3.1.dta	3	2044.13	0.0865855	0.118915	-0.00409	-2.00085	0.000492733	0.0650697
	4	mice-tumour-7-F14-1-ex2_FS-65V.17994.17994.3.1.dta	3	2044.13	0.00765268	0.272044	-0.00396	-1.93725	0.00118015	0.00533211
	5	mice-tumour-7-F14-2-ex2_FS-65V.17927.17927.3.2.dta	3	2044.13	0.0257695	0.591016	-0.004155	-2.03264	0.00762401	0.00954889
121	DDKKNMGK(4)-KMDFSR(1)	1855.9	null	NP_001219 GeneID:841 CASP8(474)-NP_001073594 GeneID:841 CASP8(59)/NP_203519 GeneID:841 CASP8(457)-NP_001073594 GeneID:841 CASP8(59)/NP_001073593 GeneID:841 CASP8(442)-NP_001073594 GeneID:841 CASP8(59)/NP_203520 GeneID:841 CASP8(442)-NP_001073594 GeneID:841 CASP8(59)/NP_001073594 GeneID:841 CASP8(516)-NP_001073594 GeneID:841 CASP8(59)/	Intra-Protein							NP_001073594	GeneID:841	CASP8(516)	NP_001073594	GeneID:841	CASP8(59)
	1	mice-tumour-7-F7-1-ex2_FS-65V.9088.9088.3.0.dta	3	1855.9	1	0.286625	-0.008608	-4.63817	1	0.0589503
122	DDLVTVKTPAFAESVTEGDVR(7)-KTGAAPAK(1)	3129.63	null	NP_001924 GeneID:1743 DLST(74)-NP_001924 GeneID:1743 DLST(145)/NP_001231812 GeneID:1743 DLST(74)-NP_001924 GeneID:1743 DLST(145)/	Intra-Protein							NP_001924	GeneID:1743	DLST(74)	NP_001924	GeneID:1743	DLST(145)
	1	mice-tumour-7-F18-2-ex2_FS-45v.19610.19610.3.0.dta	3	3129.63	4.1752e-05	1.85634e-05	-0.001136	-0.362982	4.74977e-12	1.67884e-05
	2	mice-tumour-7-F18-1-ex2_FS-45v.19631.19631.3.0.dta	3	3129.63	3.47409e-06	0.06303	-0.005671	-1.81204	1.71015e-09	7.07396e-06
123	DFGSFDKFK(7)-GELLEAIKR(8)	2256.19	null	NP_001019637 GeneID:6648 SOD2(91)-NP_001019637 GeneID:6648 SOD2(83)/NP_001019637 GeneID:6648 SOD2(91)-NP_001019636 GeneID:6648 SOD2(122)/NP_001019637 GeneID:6648 SOD2(91)-NP_000627 GeneID:6648 SOD2(122)/NP_001019636 GeneID:6648 SOD2(130)-NP_001019637 GeneID:6648 SOD2(83)/NP_001019636 GeneID:6648 SOD2(130)-NP_001019636 GeneID:6648 SOD2(122)/NP_001019636 GeneID:6648 SOD2(130)-NP_000627 GeneID:6648 …	Intra-Protein							NP_001019636	GeneID:6648	SOD2(130)	NP_001019636	GeneID:6648	SOD2(122)
	1	mice-tumour-7-F17-2-ex2_FS-65v.27374.27374.3.0.dta	3	2256.19	5.23348e-07	4.80198e-05	-0.004534	-2.00958	2.04531e-08	3.09714e-08
	2	mice-tumour-7-F17-3-ex2_FS-65v.27420.27420.3.0.dta	3	2256.19	7.13708e-10	0.001554	-0.003617	-1.60314	1.08962e-13	2.56554e-11
	3	mice-tumour-7-F17-1-ex2_FS-65v.27277.27277.4.0.dta	4	2256.19	1.03338e-05	0.263849	-0.002436	-1.0797	0.000189233	3.33276e-05
124	DFIEKR(5)-YVELKK(5)	1723.96	null	NP_002479 GeneID:4695 NDUFA2(39)-NP_002479 GeneID:4695 NDUFA2(45)/NP_002479 GeneID:4695 NDUFA2(39)-NP_001171941 GeneID:4695 NDUFA2(45)/NP_001171941 GeneID:4695 NDUFA2(39)-NP_002479 GeneID:4695 NDUFA2(45)/NP_001171941 GeneID:4695 NDUFA2(39)-NP_001171941 GeneID:4695 NDUFA2(45)/	Intra-Protein							NP_002479	GeneID:4695	NDUFA2(39)	NP_002479	GeneID:4695	NDUFA2(45)
	1	mice-tumour-7-F13-2-ex2_FS-65V.15196.15196.3.0.dta	3	1723.96	0.00940971	0.0758596	-0.003538	-2.05225	0.0178552	9.28918e-06
	2	mice-tumour-7-F13-1-ex2_FS-65V.15381.15381.3.0.dta	3	1723.96	0.0295027	0.155697	-0.002358	-1.36778	0.0468443	0.00318594
125	DFLAGGVAAAISKTAVAPIER(13)-VKLLLQVQHASK(2)	3558.04	null	NP_001143 GeneID:292 SLC25A5(23)-NP_001142 GeneID:291 SLC25A4(33)/NP_001143 GeneID:292 SLC25A5(23)-NP_001627 GeneID:293 SLC25A6(33)/NP_001143 GeneID:292 SLC25A5(23)-NP_001143 GeneID:292 SLC25A5(33)/	Intra-Protein							NP_001143	GeneID:292	SLC25A5(23)	NP_001142	GeneID:291	SLC25A4(33)
												NP_001143	GeneID:292	SLC25A5(23)	NP_001627	GeneID:293	SLC25A6(33)
												NP_001143	GeneID:292	SLC25A5(23)	NP_001143	GeneID:292	SLC25A5(33)
	1	mice-tumour-7-F19-3-ex2_FS-45v.29066.29066.5.0.dta	5	3558.04	1.59819e-06	1.45792e-06	-0.001423	-0.399939	9.86338e-14	4.27384e-06
	2	mice-tumour-7-F19-1-ex2_FS-45v.29071.29071.5.0.dta	5	3558.04	8.27492e-06	3.84128e-06	-0.000562	-0.157952	2.23117e-09	2.05381e-05
	3	mice-tumour-7-F19-2-ex2_FS-45v.29169.29169.5.0.dta	5	3558.05	8.24122e-09	0.000873237	0.004354	1.22371	1.75382e-12	7.84013e-10
126	DFLIPIGKAK(8)-GLIKSAIR(4)	2096.28	null	NP_001166939 GeneID:5162 PDHB(209)-NP_001166939 GeneID:5162 PDHB(170)/NP_001166939 GeneID:5162 PDHB(209)-NP_000916 GeneID:5162 PDHB(188)/NP_000916 GeneID:5162 PDHB(227)-NP_001166939 GeneID:5162 PDHB(170)/NP_000916 GeneID:5162 PDHB(227)-NP_000916 GeneID:5162 PDHB(188)/	Intra-Protein							NP_000916	GeneID:5162	PDHB(227)	NP_000916	GeneID:5162	PDHB(188)
	1	mice-tumour-7-F12-3-ex2_FS-65V.27425.27425.3.2.dta	3	2096.29	0.44226	0.532166	0.001429	0.681682	0.057508	0.826417
127	DFSVFFQKIR(8)-AAKGSATK(3)	2157.17	null	NP_036450 GeneID:3954 LETM1(292)-NP_036450 GeneID:3954 LETM1(279)/	Intra-Protein							NP_036450	GeneID:3954	LETM1(292)	NP_036450	GeneID:3954	LETM1(279)
	1	mice-tumour-7-F13-3-ex2_FS-65V.25946.25946.4.1.dta	4	2157.17	0.011873	0.0863467	-0.004984	-2.31043	3.65858e-05	0.00310721
	2	mice-tumour-7-F13-3-ex2_FS-65V.25970.25970.4.1.dta	4	2157.17	0.0391401	0.132412	-0.004984	-2.31043	4.77418e-05	0.0209643
	3	mice-tumour-7-F13-2-ex2_FS-65V.25933.25933.4.4.dta	4	2157.16	0.0502532	0.310076	-0.00624	-2.89268	0.00565165	0.0432276
	4	mice-tumour-7-F13-1-ex2_FS-65V.26038.26038.4.4.dta	4	2157.16	0.00647003	0.418946	-0.006639	-3.07764	5.38533e-06	0.00361081
128	DGDILGKYVD(7)-KFLPLFDR(1)	2267.2	null	NP_002148 GeneID:3336 HSPE1(99)-NP_002148 GeneID:3336 HSPE1(8)/	Intra-Protein							NP_002148	GeneID:3336	HSPE1(99)	NP_002148	GeneID:3336	HSPE1(8)
	1	mice-tumour-7-F20-1-ex2_FS-65v.31797.31797.3.0.dta	3	2267.19	6.37349e-05	0.0638589	-0.001226	-0.540756	3.47566e-05	2.30118e-06
129	DGDSVMVLPTIPEEEAKK(17)-GVFTKELPSGK(5)	3257.69	null	NP_004896 GeneID:9588 PRDX6(199)-NP_004896 GeneID:9588 PRDX6(209)/	Intra-Protein							NP_004896	GeneID:9588	PRDX6(199)	NP_004896	GeneID:9588	PRDX6(209)
	1	mice-tumour-7-F20-2-ex2_FS-65v.26375.26375.4.0.dta	4	3257.68	2.23918e-06	7.36888e-09	-0.004979	-1.52839	6.58979e-06	1.94515e-06
	2	mice-tumour-7-F20-3-ex2_FS-65v.26457.26457.4.0.dta	4	3257.68	1.53343e-06	0.00167593	-0.00784	-2.40662	0.000155486	2.32085e-06
	3	mice-tumour-7-F20-3-ex2_FS-65v.26425.26425.4.0.dta	4	3257.68	0.000145867	0.00901866	-0.00784	-2.40662	0.281072	3.76798e-06
	4	mice-tumour-7-F20-1-ex2_FS-65v.26480.26480.4.0.dta	4	3257.68	0.000449763	0.040427	-0.00446	-1.36907	0.00547046	2.59803e-06
	5	mice-tumour-7-F20-1-ex2_FS-65v.26498.26498.4.2.dta	4	3257.68	4.31758e-11	0.0740877	-0.00446	-1.36907	7.37244e-15	8.20891e-10
130	DGKLDFEEFMK(3)-YLKDHEK(3)	2428.17	null	NP_037518 GeneID:29957 SLC25A24(74)-NP_037518 GeneID:29957 SLC25A24(85)/NP_037518 GeneID:29957 SLC25A24(74)-NP_998816 GeneID:29957 SLC25A24(66)/NP_998816 GeneID:29957 SLC25A24(55)-NP_037518 GeneID:29957 SLC25A24(85)/NP_998816 GeneID:29957 SLC25A24(55)-NP_998816 GeneID:29957 SLC25A24(66)/	Intra-Protein							NP_037518	GeneID:29957	SLC25A24(74)	NP_037518	GeneID:29957	SLC25A24(85)
	1	mice-tumour-7-F20-2-ex2_FS-45v.20790.20790.4.2.dta	4	2428.17	0.0273054	0.239442	0.000955	0.3933	0.000904075	0.0204252
	2	mice-tumour-7-F20-3-ex2_FS-65v.22184.22184.3.0.dta	3	2428.19	1	0.393142	0.018194	7.49287	0.346579	1
131	DGKTLNDELEIIEGMK(3)-EIGNIISDAMKK(11)	3260.66	null	NP_002147 GeneID:3329 HSPD1(205)-NP_002147 GeneID:3329 HSPD1(191)/NP_002147 GeneID:3329 HSPD1(205)-NP_955472 GeneID:3329 HSPD1(191)/NP_955472 GeneID:3329 HSPD1(205)-NP_002147 GeneID:3329 HSPD1(191)/NP_955472 GeneID:3329 HSPD1(205)-NP_955472 GeneID:3329 HSPD1(191)/	Intra-Protein							NP_002147	GeneID:3329	HSPD1(205)	NP_002147	GeneID:3329	HSPD1(191)
	1	mice-tumour-7-F1-1-ex2_FS-45.29724.29724.4.1.dta	4	3260.68	0.490025	0.184324	0.017406	5.33818	0.000182964	0.580734
132	DGKTLNDELEIIEGMK(3)-KGVITVK(1)	2686.46	null	NP_002147 GeneID:3329 HSPD1(205)-NP_002147 GeneID:3329 HSPD1(196)/NP_002147 GeneID:3329 HSPD1(205)-NP_955472 GeneID:3329 HSPD1(196)/NP_955472 GeneID:3329 HSPD1(205)-NP_002147 GeneID:3329 HSPD1(196)/NP_955472 GeneID:3329 HSPD1(205)-NP_955472 GeneID:3329 HSPD1(196)/	Intra-Protein							NP_002147	GeneID:3329	HSPD1(205)	NP_002147	GeneID:3329	HSPD1(196)
	1	mice-tumour-7-F19-3-ex2_FS-45v.26807.26807.4.0.dta	4	2686.46	3.93624e-07	1.94276e-06	-0.00147	-0.547189	1.10495e-08	6.12352e-07
	2	mice-tumour-7-F19-1-ex2_FS-45v.26846.26846.4.0.dta	4	2686.45	1.12784e-06	2.64534e-05	-0.004532	-1.68698	5.29992e-13	5.03573e-07
	3	mice-tumour-7-F19-2-ex2_FS-45v.26855.26855.4.0.dta	4	2686.46	2.11823e-09	0.000106949	-0.001126	-0.419139	7.81026e-12	3.97762e-09
	4	mice-tumour-7-F19-1-ex2_FS-45v.26894.26894.3.2.dta	3	2686.47	1.128e-06	0.000279128	0.009804	3.64941	2.14013e-11	2.56297e-06
	5	mice-tumour-7-F19-1-ex2_FS-45v.26873.26873.3.3.dta	3	2686.47	0.00103643	0.0217732	0.00938	3.49159	1.16847e-06	0.00128666
	6	mice-tumour-7-F19-2-ex2_FS-45v.26891.26891.3.0.dta	3	2686.47	4.16326e-06	0.0406577	0.008353	3.1093	4.9396e-07	1.06275e-05
133	DGLTDVYNKIHMGSCAENTAK(9)-KLNIAR(1)	3175.59	Carbamidomethyl[C](15)	NP_000010 GeneID:38 ACAT1(190)-NP_000010 GeneID:38 ACAT1(203)/	Intra-Protein							NP_000010	GeneID:38	ACAT1(190)	NP_000010	GeneID:38	ACAT1(203)
	1	mice-tumour-7-F14-2-ex2_FS-65V.23114.23114.4.0.dta	4	3175.57	9.06759e-07	8.53431e-07	-0.016372	-5.15558	1	4.55444e-06
	2	mice-tumour-7-F14-2-ex2_FS-65V.23132.23132.4.1.dta	4	3175.57	3.51216e-08	1.1095e-06	-0.015355	-4.83533	1.55055e-07	5.61514e-07
	3	mice-tumour-7-F14-3-ex2_FS-65V.23058.23058.4.1.dta	4	3175.58	2.47373e-09	1.33018e-05	-0.003865	-1.2171	2.38234e-15	4.45443e-07
	4	mice-tumour-7-F14-2-ex2_FS-65V.23187.23187.5.0.dta	5	3175.59	9.70658e-05	4.32833e-05	-0.001453	-0.457553	0.0101332	3.93043e-07
	5	mice-tumour-7-F14-2-ex2_FS-65V.23134.23134.5.0.dta	5	3175.59	2.17255e-06	0.00195367	-0.001883	-0.592961	8.34402e-06	3.26993e-06
	6	mice-tumour-7-F14-3-ex2_FS-65V.23069.23069.5.0.dta	5	3175.59	7.60447e-11	0.00362359	0.003375	1.0628	1.831e-11	1.01517e-07
	7	mice-tumour-7-F14-1-ex2_FS-65V.23173.23173.4.1.dta	4	3175.57	6.95266e-10	0.00989433	-0.016028	-5.04725	3.97579e-10	1.35056e-06
	8	mice-tumour-7-F14-1-ex2_FS-65V.23166.23166.4.2.dta	4	3175.57	4.69855e-12	0.0613648	-0.016028	-5.04725	1	3.58816e-08
134	DGVTVAKSIDLK(7)-DVKFGADAR(3)	2361.27	null	NP_002147 GeneID:3329 HSPD1(82)-NP_002147 GeneID:3329 HSPD1(31)/NP_002147 GeneID:3329 HSPD1(82)-NP_955472 GeneID:3329 HSPD1(31)/NP_955472 GeneID:3329 HSPD1(82)-NP_002147 GeneID:3329 HSPD1(31)/NP_955472 GeneID:3329 HSPD1(82)-NP_955472 GeneID:3329 HSPD1(31)/	Intra-Protein							NP_002147	GeneID:3329	HSPD1(82)	NP_002147	GeneID:3329	HSPD1(31)
	1	mice-tumour-7-F17-3-ex2_FS-65v.20410.20410.3.0.dta	3	2361.26	0.000287137	0.373933	-0.002665	-1.12863	0.000440755	0.000378544
135	DGVTVAKSIDLK(7)-EGFEKISK(5)	2320.26	null	NP_002147 GeneID:3329 HSPD1(82)-NP_002147 GeneID:3329 HSPD1(130)/NP_002147 GeneID:3329 HSPD1(82)-NP_955472 GeneID:3329 HSPD1(130)/NP_955472 GeneID:3329 HSPD1(82)-NP_002147 GeneID:3329 HSPD1(130)/NP_955472 GeneID:3329 HSPD1(82)-NP_955472 GeneID:3329 HSPD1(130)/	Intra-Protein							NP_002147	GeneID:3329	HSPD1(82)	NP_002147	GeneID:3329	HSPD1(130)
	1	mice-tumour-7-F16-2-ex2_FS-65v.20387.20387.4.0.dta	4	2320.26	0.0159137	8.05502e-05	-0.004624	-1.99288	8.04853e-06	0.0155007
	2	mice-tumour-7-F16-3-ex2_FS-65v.20291.20291.4.0.dta	4	2320.26	0.0213689	0.0122522	-0.002016	-0.868866	1.40608e-06	0.0418383
	3	mice-tumour-7-F16-1-ex2_FS-65v.20436.20436.4.2.dta	4	2320.26	0.0229719	0.0688968	-0.00667	-2.87467	1.28736e-06	0.0240031
	4	mice-tumour-7-F16-1-ex2_FS-45v.17930.17930.3.0.dta	3	2320.27	0.860748	0.249463	0.003777	1.62783	0.0392235	0.515061
136	DGVTVAKSIDLK(7)-YKNIGAK(2)	2176.22	null	NP_002147 GeneID:3329 HSPD1(82)-NP_002147 GeneID:3329 HSPD1(91)/NP_002147 GeneID:3329 HSPD1(82)-NP_955472 GeneID:3329 HSPD1(91)/NP_955472 GeneID:3329 HSPD1(82)-NP_002147 GeneID:3329 HSPD1(91)/NP_955472 GeneID:3329 HSPD1(82)-NP_955472 GeneID:3329 HSPD1(91)/	Intra-Protein							NP_002147	GeneID:3329	HSPD1(82)	NP_002147	GeneID:3329	HSPD1(91)
	1	mice-tumour-7-F11-2-ex2_FS-65v.17460.17460.3.0.dta	3	2176.22	1.33999e-09	7.2798e-06	-0.002896	-1.33075	8.0032e-10	2.99955e-09
	2	mice-tumour-7-F11-1-ex2_FS-65v.17544.17544.3.0.dta	3	2176.22	2.74114e-06	1.62078e-05	-0.007102	-3.26345	9.95795e-10	9.07341e-08
	3	mice-tumour-7-F12-1-ex2_FS-65v.17512.17512.3.0.dta	3	2176.22	6.56967e-08	7.15008e-05	-0.005559	-2.55443	1.09659e-05	1.8977e-06
	4	mice-tumour-7-F11-2-ex2_FS-65v.17548.17548.3.0.dta	3	2176.22	2.5698e-05	0.000458592	-0.002852	-1.31053	2.00404e-06	3.46515e-05
	5	mice-tumour-7-F12-2-ex2_FS-65v.17385.17385.3.0.dta	3	2176.22	8.01177e-07	0.00134082	-0.006366	-2.92525	0.00406046	0.00134294
	6	mice-tumour-7-F11-3-ex2_FS-45v.15851.15851.4.0.dta	4	2176.22	1.71032e-05	0.00560013	-0.002497	-1.1474	7.7919e-05	1.11635e-05
	7	mice-tumour-7-F12-3-ex2_FS-65V.17200.17200.3.0.dta	3	2176.22	3.325e-06	0.0408555	-0.006615	-3.03967	0.000132116	3.23727e-06
137	DHCVAHKLFNNLK(7)-EQCEQLEKCVK(8)	3183.54	Carbamidomethyl[C](3);Carbamidomethyl[C](19);Carbamidomethyl[C](25)	NP_005995 GeneID:7388 UQCRH(85)-NP_005995 GeneID:7388 UQCRH(42)/	Intra-Protein							NP_005995	GeneID:7388	UQCRH(85)	NP_005995	GeneID:7388	UQCRH(42)
	1	mice-tumour-7-F17-3-ex2_FS-45v.13516.13516.3.2.dta	3	3183.55	2.59839e-06	0.00658562	0.013231	4.15607	6.58761e-08	2.93134e-10
	2	mice-tumour-7-F17-2-ex2_FS-45v.13611.13611.3.1.dta	3	3183.56	0.00750052	0.276292	0.025529	8.01906	1.33007e-06	0.00995769
	3	mice-tumour-7-F17-1-ex2_FS-65v.14198.14198.5.0.dta	5	3183.53	0.00413499	0.572996	-0.007842	-2.4633	2.81629e-05	0.00567744
138	DHPLPEVAHVKHLSASQK(11)-FKESFAEMNR(2)	3388.71	null	NP_001852 GeneID:1327 COX4I1(53)-NP_001852 GeneID:1327 COX4I1(87)/	Intra-Protein							NP_001852	GeneID:1327	COX4I1(53)	NP_001852	GeneID:1327	COX4I1(87)
	1	mice-tumour-7-F16-3-ex2_FS-45v.13009.13009.4.0.dta	4	3388.7	0.00252437	7.97137e-05	-0.008169	-2.41065	0.0404926	5.71804e-11
	2	mice-tumour-7-F16-1-ex2_FS-65v.15271.15271.5.1.dta	5	3388.7	0.000109706	0.0701635	-0.007086	-2.09106	0.000562379	1.0759e-07
	3	mice-tumour-7-F16-2-ex2_FS-65v.15300.15300.5.3.dta	5	3388.7	0.19014	0.320122	-0.00622	-1.83551	1	0.00017317
139	DIFNKGFGFGLVK(5)-LDVKTK(4)	2282.28	null	NP_001171752 GeneID:7417 VDAC2(31)-NP_001171752 GeneID:7417 VDAC2(43)/NP_001171752 GeneID:7417 VDAC2(31)-NP_001171712 GeneID:7417 VDAC2(58)/NP_001171752 GeneID:7417 VDAC2(31)-NP_003366 GeneID:7417 VDAC2(43)/NP_001171712 GeneID:7417 VDAC2(46)-NP_001171752 GeneID:7417 VDAC2(43)/NP_001171712 GeneID:7417 VDAC2(46)-NP_001171712 GeneID:7417 VDAC2(58)/NP_001171712 GeneID:7417 VDAC2(46)-NP_003366 GeneID:…	Intra-Protein							NP_001171712	GeneID:7417	VDAC2(46)	NP_001171712	GeneID:7417	VDAC2(58)
	1	mice-tumour-7-F17-3-ex2_FS-65v.28172.28172.3.0.dta	3	2282.27	0.22253	0.109142	-0.005213	-2.28412	1.18983e-06	0.416024
	2	mice-tumour-7-F17-1-ex2_FS-65v.28027.28027.3.0.dta	3	2282.27	0.186585	0.131457	-0.005073	-2.22278	2.33476e-06	0.225301
	3	mice-tumour-7-F17-1-ex2_FS-65v.28004.28004.4.0.dta	4	2282.28	1	0.415925	-0.002785	-1.22027	0.000618313	1
140	DIKNVPFK(3)-LVGMPAKR(7)	1969.13	null	NP_004125 GeneID:3313 HSPA9(138)-NP_004125 GeneID:3313 HSPA9(106)/	Intra-Protein							NP_004125	GeneID:3313	HSPA9(138)	NP_004125	GeneID:3313	HSPA9(106)
	1	mice-tumour-7-F8-2-ex2_FS45V.16857.16857.4.0.dta	4	1969.13	0.0157139	2.57307e-05	-0.00137	-0.695739	0.000384489	0.00568776
	2	mice-tumour-7-F8-1-ex2_FS-45V.16886.16886.4.1.dta	4	1969.13	0.00463652	0.00445213	-0.001205	-0.611945	0.000428621	0.0124337
141	DILNMEKTLK(7)-AKEIGFSDK(2)	2336.24	null	NP_001116105 GeneID:1373 CPS1(895)-NP_001116105 GeneID:1373 CPS1(914)/NP_001116105 GeneID:1373 CPS1(895)-NP_001866 GeneID:1373 CPS1(908)/NP_001116105 GeneID:1373 CPS1(895)-NP_001116106 GeneID:1373 CPS1(457)/NP_001866 GeneID:1373 CPS1(889)-NP_001116105 GeneID:1373 CPS1(914)/NP_001866 GeneID:1373 CPS1(889)-NP_001866 GeneID:1373 CPS1(908)/NP_001866 GeneID:1373 CPS1(889)-NP_001116106 GeneID:1373 CPS1…	Intra-Protein							NP_001866	GeneID:1373	CPS1(889)	NP_001866	GeneID:1373	CPS1(908)
	1	mice-tumour-7-F17-1-ex2_FS-65v.21949.21949.3.0.dta	3	2336.23	2.40492e-09	0.0404876	-0.01009	-4.3189	1.15003e-06	5.03644e-11
	2	mice-tumour-7-F17-3-ex2_FS-65v.22058.22058.3.0.dta	3	2336.24	1.09968e-10	0.103513	-0.005437	-2.32724	4.53603e-08	7.56118e-11
142	DILNMEKTLK(7)-KELSEPSSTR(1)	2475.3	null	NP_001116105 GeneID:1373 CPS1(895)-NP_001116105 GeneID:1373 CPS1(847)/NP_001116105 GeneID:1373 CPS1(895)-NP_001866 GeneID:1373 CPS1(841)/NP_001116105 GeneID:1373 CPS1(895)-NP_001116106 GeneID:1373 CPS1(390)/NP_001866 GeneID:1373 CPS1(889)-NP_001116105 GeneID:1373 CPS1(847)/NP_001866 GeneID:1373 CPS1(889)-NP_001866 GeneID:1373 CPS1(841)/NP_001866 GeneID:1373 CPS1(889)-NP_001116106 GeneID:1373 CPS1…	Intra-Protein							NP_001866	GeneID:1373	CPS1(889)	NP_001866	GeneID:1373	CPS1(841)
	1	mice-tumour-7-F16-2-ex2_FS-65v.18848.18848.3.0.dta	3	2475.3	0.00164671	1.21922e-05	-0.001072	-0.433079	4.13367e-05	0.00714313
	2	mice-tumour-7-F16-3-ex2_FS-65v.18748.18748.3.0.dta	3	2475.3	8.18449e-12	0.000354527	-0.000708	-0.286026	6.75282e-08	0.00178941
	3	mice-tumour-7-F16-1-ex2_FS-65v.18857.18857.3.0.dta	3	2475.3	0.000974413	0.000417182	-5.6e-05	-0.022624	9.53084e-06	0.00497775
143	DILNMEKTLK(7)-WFLYKMR(5)	2385.27	null	NP_001116105 GeneID:1373 CPS1(895)-NP_001116105 GeneID:1373 CPS1(886)/NP_001116105 GeneID:1373 CPS1(895)-NP_001866 GeneID:1373 CPS1(880)/NP_001116105 GeneID:1373 CPS1(895)-NP_001116106 GeneID:1373 CPS1(429)/NP_001866 GeneID:1373 CPS1(889)-NP_001116105 GeneID:1373 CPS1(886)/NP_001866 GeneID:1373 CPS1(889)-NP_001866 GeneID:1373 CPS1(880)/NP_001866 GeneID:1373 CPS1(889)-NP_001116106 GeneID:1373 CPS1…	Intra-Protein							NP_001866	GeneID:1373	CPS1(889)	NP_001866	GeneID:1373	CPS1(880)
	1	mice-tumour-7-F19-2-ex2_FS-45v.28555.28555.3.2.dta	3	2385.27	6.08698e-07	0.0659724	0.004101	1.7193	5.08758e-05	4.36349e-06
144	DKAHSIGK(2)-KIGDFR(1)	1727.94	null	NP_068746 GeneID:60558 GUF1(574)-NP_665811 GeneID:9131 AIFM1(282)/NP_068746 GeneID:60558 GUF1(574)-NP_004199 GeneID:9131 AIFM1(286)/NP_068746 GeneID:60558 GUF1(574)-NP_001124319 GeneID:9131 AIFM1(286)/	Inter-Protein							NP_068746	GeneID:60558	GUF1(574)	NP_004199	GeneID:9131	AIFM1(286)
	1	mice-tumour-7-F5-1-ex2_FS-45v.16084.16084.3.0.dta	3	1727.94	1	0.0502595	-0.007158	-4.1425	1	0.00188409
145	DKGTMLGK(2)-MLTKIIR(4)	1861.06	null	NP_001116105 GeneID:1373 CPS1(182)-NP_001116105 GeneID:1373 CPS1(177)/NP_001116105 GeneID:1373 CPS1(182)-NP_001866 GeneID:1373 CPS1(171)/NP_001866 GeneID:1373 CPS1(176)-NP_001116105 GeneID:1373 CPS1(177)/NP_001866 GeneID:1373 CPS1(176)-NP_001866 GeneID:1373 CPS1(171)/	Intra-Protein							NP_001866	GeneID:1373	CPS1(176)	NP_001866	GeneID:1373	CPS1(171)
	1	mice-tumour-7-F14-1-ex2_FS-45V.17157.17157.4.0.dta	4	1861.06	0.000444408	3.38775e-09	-0.000924	-0.49649	1.61741e-07	0.060489
	2	mice-tumour-7-F7-2-ex2_FS-45V.12963.12963.4.1.dta	4	1877.06	0.00123906	2.45664e-07	-0.00132	-0.703227	0.000854257	0.0127297
	3	mice-tumour-7-F14-2-ex2_FS-45V.17061.17061.4.0.dta	4	1861.06	0.000793214	2.60334e-07	-0.001406	-0.755481	3.81119e-07	0.0347626
	4	mice-tumour-7-F7-1-ex2_FS-45V.13112.13112.4.0.dta	4	1877.06	0.0194328	1.00152e-05	-0.003686	-1.96371	0.000527242	0.0214408
	5	mice-tumour-7-F9-1-ex2_FS-45v.16423.16423.4.0.dta	4	1861.06	0.000436466	0.000236282	-0.002261	-1.2149	1.89383e-10	0.0698446
	6	mice-tumour-7-F17-2-ex2_FS-45v.16714.16714.4.0.dta	4	1861.06	6.68055e-06	0.000431078	-0.001193	-0.641031	1.82936e-06	0.020585
	7	mice-tumour-7-F10-3-ex2_FS-45v.16673.16673.4.0.dta	4	1861.06	0.0347437	0.000619976	-0.002508	-1.34762	9.56311e-06	0.694505
	8	mice-tumour-7-F10-3-ex2_FS-45v.16651.16651.4.0.dta	4	1861.06	0.0374274	0.000639132	-0.002581	-1.38684	2.79285e-05	0.562011
	9	mice-tumour-7-F10-3-ex2_FS-45v.13372.13372.4.0.dta	4	1877.06	0.0862599	0.000649349	-0.001855	-0.988248	0.0236406	0.0575978
	10	mice-tumour-7-F9-2-ex2_FS-45V.16202.16202.4.0.dta	4	1861.06	0.0061388	0.000812445	-0.001134	-0.609329	8.14768e-06	0.337587
	11	mice-tumour-7-F10-3-ex2_FS-45v.13423.13423.4.1.dta	4	1877.06	0.0630707	0.000853885	-0.001855	-0.988248	0.0985272	0.0754773
	12	mice-tumour-7-F10-3-ex2_FS-45v.16703.16703.4.0.dta	4	1861.06	0.0297133	0.00108888	-0.002463	-1.32344	0.000135093	1
	13	mice-tumour-7-F9-1-ex2_FS-45v.16387.16387.4.0.dta	4	1861.06	0.0336313	0.00144779	-0.002305	-1.23854	5.21297e-07	0.252861
	14	mice-tumour-7-F10-3-ex2_FS-45v.16958.16958.4.1.dta	4	1861.06	0.976261	0.00227793	-0.001574	-0.845752	0.400004	1
	15	mice-tumour-7-F10-3-ex2_FS-45v.16845.16845.4.0.dta	4	1861.06	0.227123	0.00260397	-0.002363	-1.2697	0.00459998	0.8176
	16	mice-tumour-7-F1-2-ex2_FS-45V.17187.17187.4.0.dta	4	1861.07	0.00578742	0.00284008	0.000318	0.17087	0.000304171	0.139146
	17	mice-tumour-7-F9-2-ex2_FS-45V.16173.16173.4.0.dta	4	1861.06	0.0439052	0.00399766	-0.001122	-0.602881	1.84233e-06	0.333505
	18	mice-tumour-7-F9-1-ex2_FS-45v.16536.16536.4.0.dta	4	1861.06	0.0136314	0.0043775	-0.002956	-1.58834	1.157e-06	0.173459
	19	mice-tumour-7-F17-1-ex2_FS-45v.16626.16626.4.0.dta	4	1861.07	0.000587283	0.00449757	0.00038	0.204184	0.000328135	0.11381
	20	mice-tumour-7-F17-3-ex2_FS-45v.16592.16592.4.0.dta	4	1861.07	0.000393089	0.0046406	0.00049	0.26329	3.66811e-05	0.0415896
	21	mice-tumour-7-F14-3-ex2_FS-45V.17159.17159.4.0.dta	4	1861.06	0.00118481	0.0048321	-0.000652	-0.350337	5.75134e-05	0.217374
	22	mice-tumour-7-F9-1-ex2_FS-45v.14465.14465.4.0.dta	4	1877.06	0.00187871	0.00513509	-0.000693	-0.369194	0.00035834	0.00436439
	23	mice-tumour-7-F11-1-ex2_FS-45v.17193.17193.4.0.dta	4	1861.06	0.0887987	0.00524339	-0.002384	-1.28099	0.0301601	0.709679
	24	mice-tumour-7-F17-3-ex2_FS-45v.16639.16639.4.0.dta	4	1861.07	0.00154495	0.00737989	0.000459	0.246633	0.000744479	0.0872486
	25	mice-tumour-7-F10-3-ex2_FS-45v.14755.14755.4.0.dta	4	1877.06	0.00890307	0.00784417	-0.003861	-2.05694	0.00249662	0.0216358
	26	mice-tumour-7-F4-2-ex2_FS-45V.14306.14306.4.0.dta	4	1877.06	0.000257322	0.0118232	-0.002119	-1.12889	0.000348142	0.00195625
	27	mice-tumour-7-F9-3-ex2_FS-45v.16313.16313.4.0.dta	4	1861.06	0.0045356	0.0144188	-0.001387	-0.745272	1.07641e-05	0.277229
	28	mice-tumour-7-F1-1-ex2_FS-45.17188.17188.4.1.dta	4	1861.06	0.0111503	0.0150778	-0.000489	-0.262753	0.0235841	0.0926135
	29	mice-tumour-7-F10-1-ex2_FS-45v.16630.16630.4.0.dta	4	1861.06	0.0526256	0.0164591	-0.003051	-1.63938	2.10072e-06	1
	30	mice-tumour-7-F9-2-ex2_FS-45V.14276.14276.4.1.dta	4	1877.06	0.0426023	0.0179048	-0.001218	-0.648887	0.00428667	0.154488
	31	mice-tumour-7-F10-3-ex2_FS-45v.14682.14682.4.1.dta	4	1877.06	0.0354814	0.0186917	-0.003327	-1.77245	0.108646	0.0355165
	32	mice-tumour-7-F9-2-ex2_FS-45V.16247.16247.4.0.dta	4	1861.06	0.120417	0.0229576	-0.001153	-0.619538	0.000494038	0.583355
	33	mice-tumour-7-F10-1-ex2_FS-45v.16557.16557.4.0.dta	4	1861.06	0.0176482	0.0269603	-0.003216	-1.72804	3.86058e-05	0.709338
	34	mice-tumour-7-F9-3-ex2_FS-45v.16364.16364.4.0.dta	4	1861.06	1	0.0340159	-0.001379	-0.740974	0.00203418	1
	35	mice-tumour-7-F10-2-ex2_FS-45v.16590.16590.4.0.dta	4	1861.06	0.16223	0.0378675	-0.002111	-1.1343	0.0589066	1
	36	mice-tumour-7-F9-3-ex2_FS-45v.16527.16527.4.0.dta	4	1861.06	1	0.0382022	-0.001339	-0.719481	0.118713	1
	37	mice-tumour-7-F10-1-ex2_FS-45v.16824.16824.4.0.dta	4	1861.06	0.649224	0.0384407	-0.001159	-0.622762	0.0761699	1
	38	mice-tumour-7-F10-2-ex2_FS-45v.16541.16541.4.0.dta	4	1861.06	0.0665656	0.0414271	-0.002206	-1.18534	1.78585e-05	1
	39	mice-tumour-7-F11-2-ex2_FS-45v.17315.17315.4.2.dta	4	1861.06	1	0.0462306	-0.001663	-0.893574	0.8589	1
	40	mice-tumour-7-F10-1-ex2_FS-45v.16721.16721.4.0.dta	4	1861.06	0.139702	0.0479696	-0.002714	-1.4583	0.00942428	1
	41	mice-tumour-7-F10-2-ex2_FS-45v.16746.16746.4.0.dta	4	1861.06	0.224863	0.0582992	-0.000756	-0.406219	0.000735209	0.970907
	42	mice-tumour-7-F10-1-ex2_FS-45v.16848.16848.4.3.dta	4	1861.06	1	0.058555	-0.001497	-0.804378	0.997225	1
	43	mice-tumour-7-F9-3-ex2_FS-45v.16419.16419.3.2.dta	3	1861.06	0.0193411	0.0633538	-0.000993	-0.533566	0.00168219	0.110057
	44	mice-tumour-7-F10-1-ex2_FS-45v.16553.16553.4.0.dta	4	1861.06	0.0259463	0.0734611	-0.003334	-1.79145	1.1979e-06	0.178874
	45	mice-tumour-7-F10-1-ex2_FS-45v.14637.14637.4.3.dta	4	1877.06	0.0361543	0.0822818	-0.001584	-0.843873	0.0924371	0.0604844
	46	mice-tumour-7-F9-3-ex2_FS-45v.16497.16497.4.0.dta	4	1861.06	0.440832	0.0828682	-0.001134	-0.609329	0.0160917	0.980874
	47	mice-tumour-7-F11-3-ex2_FS-45v.17197.17197.4.0.dta	4	1861.06	0.0290403	0.0867024	-0.003223	-1.7318	0.0150508	0.255011
	48	mice-tumour-7-F17-1-ex2_FS-45v.16598.16598.4.2.dta	4	1861.07	0.00107904	0.0869657	0.00038	0.204184	0.000757623	0.0544757
	49	mice-tumour-7-F10-2-ex2_FS-45v.16829.16829.4.2.dta	4	1861.06	0.35847	0.0903327	-0.000221	-0.118749	0.0470057	1
	50	mice-tumour-7-F10-1-ex2_FS-45v.16676.16676.4.0.dta	4	1861.06	0.912302	0.0956103	-0.003023	-1.62434	1	1
	51	mice-tumour-7-F10-3-ex2_FS-45v.16767.16767.3.0.dta	3	1861.06	0.201514	0.102341	-0.009332	-5.01433	0.0505871	0.210044
	52	mice-tumour-7-F4-1-ex2_FS-45V.14264.14264.4.0.dta	4	1877.06	0.000172635	0.10635	-0.003267	-1.74049	0.000234607	0.000437507
	53	mice-tumour-7-F10-1-ex2_FS-45v.14597.14597.4.2.dta	4	1877.06	0.0117862	0.135698	-0.001662	-0.885427	0.00513552	0.0398108
	54	mice-tumour-7-F10-1-ex2_FS-45v.13411.13411.4.2.dta	4	1877.06	0.391987	0.140564	-0.00159	-0.847069	0.121893	0.342942
	55	mice-tumour-7-F10-1-ex2_FS-45v.13478.13478.4.2.dta	4	1877.06	0.0431883	0.143189	-0.00159	-0.847069	0.0723958	0.0611196
	56	mice-tumour-7-F10-2-ex2_FS-45v.16728.16728.4.0.dta	4	1861.06	1	0.14793	-0.001437	-0.772139	0.224649	1
	57	mice-tumour-7-F9-2-ex2_FS-45V.14202.14202.4.2.dta	4	1877.06	0.449235	0.163818	-0.001807	-0.962676	0.653254	0.306225
	58	mice-tumour-7-F7-3-ex2_FS-45V.13157.13157.4.1.dta	4	1877.06	0.00260733	0.257017	-0.003721	-1.98236	0.000367645	0.0251693
	59	mice-tumour-7-F9-3-ex2_FS-45v.14436.14436.4.2.dta	4	1877.06	0.0960478	0.257755	-7.7e-05	-0.041022	0.011626	0.1756
	60	mice-tumour-7-F4-3-ex2_FS-45v.14301.14301.4.0.dta	4	1877.06	0.010293	0.258182	-0.001671	-0.890222	0.0299224	0.00866433
	61	mice-tumour-7-F4-1-ex2_FS-45V.14212.14212.4.2.dta	4	1877.06	0.0842255	0.274489	-0.003267	-1.74049	0.166933	0.04169
	62	mice-tumour-7-F9-1-ex2_FS-45v.16367.16367.4.0.dta	4	1861.06	1	0.293137	-0.00206	-1.10689	0.971628	1
	63	mice-tumour-7-F4-3-ex2_FS-45v.14323.14323.4.0.dta	4	1877.06	0.000851572	0.318657	-0.001671	-0.890222	0.0021958	0.00155114
	64	mice-tumour-7-F13-3-ex2_FS-45V.17338.17338.4.2.dta	4	1861.07	1	0.511728	0.001035	0.556133	1	1
146	DKGTMLGKIEFEGQPVDFVDPNK(8)-MLTKIIR(4)	3575.89	null	NP_001116105 GeneID:1373 CPS1(188)-NP_001116105 GeneID:1373 CPS1(177)/NP_001116105 GeneID:1373 CPS1(188)-NP_001866 GeneID:1373 CPS1(171)/NP_001866 GeneID:1373 CPS1(182)-NP_001116105 GeneID:1373 CPS1(177)/NP_001866 GeneID:1373 CPS1(182)-NP_001866 GeneID:1373 CPS1(171)/	Intra-Protein							NP_001866	GeneID:1373	CPS1(182)	NP_001866	GeneID:1373	CPS1(171)
	1	mice-tumour-7-F19-2-ex2_FS-45v.27443.27443.5.1.dta	5	3575.88	0.0485579	0.033966	-0.002811	-0.786099	1.29678e-06	0.0393044
	2	mice-tumour-7-F19-3-ex2_FS-65v.28205.28205.4.1.dta	4	3575.91	0.000617655	0.0748105	0.024266	6.78601	1	0.295188
147	DLKEVTPEGLQMVK(3)-DKQSYR(2)	2520.3	null	NP_001072992 GeneID:10606 PAICS(235)-NP_001072992 GeneID:10606 PAICS(228)/NP_001072992 GeneID:10606 PAICS(235)-NP_001072993 GeneID:10606 PAICS(235)/NP_001072992 GeneID:10606 PAICS(235)-NP_006443 GeneID:10606 PAICS(228)/NP_001072993 GeneID:10606 PAICS(242)-NP_001072992 GeneID:10606 PAICS(228)/NP_001072993 GeneID:10606 PAICS(242)-NP_001072993 GeneID:10606 PAICS(235)/NP_001072993 GeneID:10606 PAICS(…	Intra-Protein							NP_001072993	GeneID:10606	PAICS(242)	NP_001072993	GeneID:10606	PAICS(235)
	1	mice-tumour-7-F16-2-ex2_FS-65v.19372.19372.3.0.dta	3	2520.3	1.06529e-05	3.39462e-05	-0.002667	-1.05821	3.6342e-09	1.81715e-05
	2	mice-tumour-7-F16-3-ex2_FS-65v.19282.19282.3.0.dta	3	2520.3	9.6103e-07	0.000522721	-0.001792	-0.711026	1.39726e-09	1.8873e-06
	3	mice-tumour-7-F16-1-ex2_FS-65v.19412.19412.3.0.dta	3	2520.3	1.75067e-05	0.00824892	-0.003287	-1.30421	7.43389e-12	2.02049e-05
148	DLKEVTPEGLQMVK(3)-EGYKFYPPK(4)	2852.48	null	NP_001072992 GeneID:10606 PAICS(235)-NP_001072992 GeneID:10606 PAICS(120)/NP_001072992 GeneID:10606 PAICS(235)-NP_001072993 GeneID:10606 PAICS(127)/NP_001072992 GeneID:10606 PAICS(235)-NP_006443 GeneID:10606 PAICS(120)/NP_001072993 GeneID:10606 PAICS(242)-NP_001072992 GeneID:10606 PAICS(120)/NP_001072993 GeneID:10606 PAICS(242)-NP_001072993 GeneID:10606 PAICS(127)/NP_001072993 GeneID:10606 PAICS(…	Intra-Protein							NP_001072993	GeneID:10606	PAICS(242)	NP_001072993	GeneID:10606	PAICS(127)
	1	mice-tumour-7-F18-1-ex2_FS-45v.23004.23004.4.2.dta	4	2852.48	0.0614665	0.273764	-0.001648	-0.577743	0.00578837	0.0557761
149	DLKEVTPEGLQMVK(3)-SQQKDK(4)	2457.29	null	NP_001072992 GeneID:10606 PAICS(235)-NP_001072992 GeneID:10606 PAICS(226)/NP_001072992 GeneID:10606 PAICS(235)-NP_001072993 GeneID:10606 PAICS(233)/NP_001072992 GeneID:10606 PAICS(235)-NP_006443 GeneID:10606 PAICS(226)/NP_001072993 GeneID:10606 PAICS(242)-NP_001072992 GeneID:10606 PAICS(226)/NP_001072993 GeneID:10606 PAICS(242)-NP_001072993 GeneID:10606 PAICS(233)/NP_001072993 GeneID:10606 PAICS(…	Intra-Protein							NP_001072993	GeneID:10606	PAICS(242)	NP_001072993	GeneID:10606	PAICS(233)
	1	mice-tumour-7-F16-1-ex2_FS-65v.16528.16528.3.0.dta	3	2457.29	2.48823e-06	0.0382386	-0.000599	-0.243764	9.3479e-05	0.000232835
	2	mice-tumour-7-F16-3-ex2_FS-65v.16436.16436.3.0.dta	3	2457.29	0.000562509	0.179269	-0.003462	-1.40887	1.38034e-07	0.00483618
150	DLQPVKQENEK(6)-VAPDEKYVAAK(6)	2655.39	null	NP_001165074 GeneID:9581 PREPL(79)-NP_001165074 GeneID:9581 PREPL(168)/NP_001165074 GeneID:9581 PREPL(79)-NP_006027 GeneID:9581 PREPL(168)/NP_001165074 GeneID:9581 PREPL(79)-NP_001035845 GeneID:9581 PREPL(168)/NP_001165074 GeneID:9581 PREPL(79)-NP_001165088 GeneID:9581 PREPL(79)/NP_001165074 GeneID:9581 PREPL(79)-NP_001035844 GeneID:9581 PREPL(168)/NP_001165074 GeneID:9581 PREPL(79)-NP_001165084 …	Intra-Protein							NP_001165074	GeneID:9581	PREPL(79)	NP_001165074	GeneID:9581	PREPL(168)
	1	mice-tumour-7-F11-3-ex2_FS-45v.22800.22800.3.1.dta	3	2655.39	1	0.177214	0.006924	2.60753	1	0.60416
151	DNGKHALIIYDDLSK(4)-GPIGSKTR(6)	2654.41	null	NP_004037 GeneID:498 ATP5F1A(305)-NP_004037 GeneID:498 ATP5F1A(167)/NP_004037 GeneID:498 ATP5F1A(305)-NP_001001935 GeneID:498 ATP5F1A(117)/NP_004037 GeneID:498 ATP5F1A(305)-NP_001244264 GeneID:498 ATP5F1A(117)/NP_004037 GeneID:498 ATP5F1A(305)-NP_001001937 GeneID:498 ATP5F1A(167)/NP_001001935 GeneID:498 ATP5F1A(255)-NP_004037 GeneID:498 ATP5F1A(167)/NP_001001935 GeneID:498 ATP5F1A(255)-NP_0010019…	Intra-Protein							NP_001244264	GeneID:498	ATP5F1A(255)	NP_001244264	GeneID:498	ATP5F1A(117)
	1	mice-tumour-7-F12-1-ex2_FS-65v.18759.18759.4.0.dta	4	2654.41	0.270741	0.0117143	-0.004882	-1.8392	7.60021e-05	0.363494
	2	mice-tumour-7-F12-3-ex2_FS-65V.18408.18408.4.0.dta	4	2654.41	0.106029	0.0751219	-0.008909	-3.35629	4.16698e-06	0.0467308
	3	mice-tumour-7-F12-1-ex2_FS-45v.17138.17138.3.0.dta	3	2654.41	0.0738092	0.201523	-0.004034	-1.51973	5.49971e-16	0.00352236
152	DNGKHALIIYDDLSK(4)-STVAQLVKR(8)	2840.55	null	NP_004037 GeneID:498 ATP5F1A(305)-NP_004037 GeneID:498 ATP5F1A(261)/NP_004037 GeneID:498 ATP5F1A(305)-NP_001001935 GeneID:498 ATP5F1A(211)/NP_004037 GeneID:498 ATP5F1A(305)-NP_001244264 GeneID:498 ATP5F1A(211)/NP_004037 GeneID:498 ATP5F1A(305)-NP_001244263 GeneID:498 ATP5F1A(239)/NP_004037 GeneID:498 ATP5F1A(305)-NP_001001937 GeneID:498 ATP5F1A(261)/NP_001001935 GeneID:498 ATP5F1A(255)-NP_004037 …	Intra-Protein							NP_001244264	GeneID:498	ATP5F1A(255)	NP_001244264	GeneID:498	ATP5F1A(211)
	1	mice-tumour-7-F13-3-ex2_FS-65V.22479.22479.4.0.dta	4	2840.55	0.220782	0.000200674	0.00262	0.922356	3.62915e-08	0.0473936
	2	mice-tumour-7-F13-1-ex2_FS-65V.22554.22554.4.0.dta	4	2840.55	0.0197807	0.00104461	-0.000851	-0.29959	1.04364e-06	0.00291477
	3	mice-tumour-7-F13-2-ex2_FS-65V.22462.22462.4.0.dta	4	2840.56	0.0903284	0.00257751	0.004578	1.61166	5.54001e-06	0.0103253
153	DNKFKIPK(5)-KDNKFK(4)	1906.08	null	NP_001095132 GeneID:4898 NRDC(700)-NP_001095132 GeneID:4898 NRDC(698)/NP_001095132 GeneID:4898 NRDC(700)-NP_002516 GeneID:4898 NRDC(766)/NP_001095132 GeneID:4898 NRDC(700)-NP_001229290 GeneID:4898 NRDC(634)/NP_002516 GeneID:4898 NRDC(768)-NP_001095132 GeneID:4898 NRDC(698)/NP_002516 GeneID:4898 NRDC(768)-NP_002516 GeneID:4898 NRDC(766)/NP_002516 GeneID:4898 NRDC(768)-NP_001229290 GeneID:4898 NRDC…	Intra-Protein							NP_002516	GeneID:4898	NRDC(768)	NP_002516	GeneID:4898	NRDC(766)
	1	mice-tumour-7-F12-1-ex2_FS-45v.31933.31933.3.3.dta	3	1906.08	1	0.335147	0.001708	0.89608	1	1
154	DNKKPFIK(3)-MVDQLR(1)	1888.04	null	NP_000008 GeneID:35 ACADS(338)-NP_065129 GeneID:10017 BCL2L10(1)/	Inter-Protein							NP_000008	GeneID:35	ACADS(338)	NP_065129	GeneID:10017	BCL2L10(1)
	1	mice-tumour-7-F8-1-ex2_FS-45V.8847.8847.4.3.dta	4	1888.04	0.122624	0.224767	0.000925	0.489927	0.305102	0.00166514
	2	mice-tumour-7-F8-2-ex2_FS45V.8817.8817.4.3.dta	4	1888.04	0.102093	0.232569	0.003176	1.68217	0.219261	0.00971735
155	DNMVKLNDGSQITYEK(5)-KVVQLDVR(1)	2948.54	null	NP_665811 GeneID:9131 AIFM1(240)-NP_665811 GeneID:9131 AIFM1(228)/NP_665811 GeneID:9131 AIFM1(240)-NP_004199 GeneID:9131 AIFM1(232)/NP_665811 GeneID:9131 AIFM1(240)-NP_001124319 GeneID:9131 AIFM1(232)/NP_004199 GeneID:9131 AIFM1(244)-NP_665811 GeneID:9131 AIFM1(228)/NP_004199 GeneID:9131 AIFM1(244)-NP_004199 GeneID:9131 AIFM1(232)/NP_004199 GeneID:9131 AIFM1(244)-NP_001124319 GeneID:9131 AIFM1(23…	Intra-Protein							NP_004199	GeneID:9131	AIFM1(244)	NP_004199	GeneID:9131	AIFM1(232)
	1	mice-tumour-7-F16-1-ex2_FS-45v.17121.17121.4.0.dta	4	2948.51	0.0366074	0.151389	-0.027566	-9.34904	0.0840858	1.35201e-06
156	DNPKIVHAFDMEDLGDK(4)-HNEETGDNVGPLIIKK(15)	3844.91	null	NP_060934 GeneID:55847 CISD1(55)-NP_060934 GeneID:55847 CISD1(104)/	Intra-Protein							NP_060934	GeneID:55847	CISD1(55)	NP_060934	GeneID:55847	CISD1(104)
	1	mice-tumour-7-F1-2-ex2_FS-65V.25949.25949.5.1.dta	5	3844.9	2.2977e-05	2.23002e-06	-0.001252	-0.325626	7.12994e-05	2.49143e-06
	2	mice-tumour-7-F1-3-ex2_FS-65V.25977.25977.5.0.dta	5	3844.9	1	6.25077e-06	-0.005485	-1.42656	1	0.000365167
	3	mice-tumour-7-F1-1-ex2_FS-65v.26204.26204.5.0.dta	5	3844.91	6.55617e-05	0.000202166	0.003118	0.810943	1	1.68768e-05
	4	mice-tumour-7-F1-2-ex2_FS-45V.23378.23378.4.0.dta	4	3844.91	4.74085e-12	0.00097853	0.003297	0.857498	1.32815e-09	6.25016e-13
	5	mice-tumour-7-F1-2-ex2_FS-45V.23393.23393.6.2.dta	6	3844.92	0.0010563	0.00555371	0.011623	3.02296	1.33458e-08	0.000485689
	6	mice-tumour-7-F1-1-ex2_FS-45.23481.23481.6.1.dta	6	3844.92	5.11046e-05	0.0073719	0.015542	4.04223	4.88359e-06	0.000195855
	7	mice-tumour-7-F1-3-ex2_FS-45V.23392.23392.6.1.dta	6	3844.92	3.01927e-06	0.0135956	0.011615	3.02088	3.78726e-05	1.92856e-07
	8	mice-tumour-7-F1-1-ex2_FS-45.23474.23474.6.2.dta	6	3844.92	1.43581e-06	0.0203304	0.015542	4.04223	1.75038e-06	3.1963e-05
157	DPAAAPATGNKK(11)-WSSEKR(5)	2070.06	null	NP_001158508 GeneID:4967 OGDH(995)-NP_001158508 GeneID:4967 OGDH(272)/NP_001158508 GeneID:4967 OGDH(995)-NP_002532 GeneID:4967 OGDH(276)/NP_001158508 GeneID:4967 OGDH(995)-NP_001003941 GeneID:4967 OGDH(276)/NP_001158508 GeneID:4967 OGDH(995)-NP_060715 GeneID:55753 OGDHL(263)/NP_001158508 GeneID:4967 OGDH(995)-NP_001137469 GeneID:55753 OGDHL(54)/NP_001158508 GeneID:4967 OGDH(995)-NP_001137468 Gene…	Intra-Protein							NP_001158508	GeneID:4967	OGDH(995)	NP_001158508	GeneID:4967	OGDH(272)
												NP_001158508	GeneID:4967	OGDH(995)	NP_060715	GeneID:55753	OGDHL(263)
	1	mice-tumour-7-F19-1-ex2_FS-65v.3743.3743.4.0.dta	4	2070.06	1	0.0497578	-0.003315	-1.6014	0.791366	1
158	DPKGVKIIK(3)-MALGPR(1)	1779.06	null	NP_001180242 GeneID:79783 SUGCT(121)-NP_001229811 GeneID:55739 NAXD(1)/NP_001180240 GeneID:79783 SUGCT(121)-NP_001229811 GeneID:55739 NAXD(1)/NP_001180241 GeneID:79783 SUGCT(121)-NP_001229811 GeneID:55739 NAXD(1)/	Inter-Protein							NP_001180242	GeneID:79783	SUGCT(121)	NP_001229811	GeneID:55739	NAXD(1)
	1	mice-tumour-7-F1-3-ex2_FS-45V.11631.11631.4.0.dta	4	1779.05	0.289492	0.434939	-0.001489	-0.836961	0.534871	5.17858e-05
159	DPLYIGLKHQR(8)-PVPLKKR(5)	2314.38	null	NP_001014811 GeneID:10873 ME3(247)-NP_001014811 GeneID:10873 ME3(47)/NP_001014811 GeneID:10873 ME3(247)-NP_006671 GeneID:10873 ME3(47)/NP_001014811 GeneID:10873 ME3(247)-NP_001155058 GeneID:10873 ME3(47)/NP_006671 GeneID:10873 ME3(247)-NP_001014811 GeneID:10873 ME3(47)/NP_006671 GeneID:10873 ME3(247)-NP_006671 GeneID:10873 ME3(47)/NP_006671 GeneID:10873 ME3(247)-NP_001155058 GeneID:10873 ME3(47)/…	Intra-Protein							NP_001014811	GeneID:10873	ME3(247)	NP_001014811	GeneID:10873	ME3(47)
	1	mice-tumour-7-F9-3-ex2_FS-65v.28052.28052.3.1.dta	3	2314.38	1	0.146609	-0.000515	-0.222522	1	1
160	DQEAKER(5)-MAGVLKK(1)	1758.94	null	NP_003767 GeneID:64976 MRPL40(65)-NP_001269351 GeneID:4698 NDUFA5(1)/NP_003767 GeneID:64976 MRPL40(65)-NP_001269348 GeneID:4698 NDUFA5(1)/NP_003767 GeneID:64976 MRPL40(65)-NP_004991 GeneID:4698 NDUFA5(1)/	Inter-Protein							NP_003767	GeneID:64976	MRPL40(65)	NP_004991	GeneID:4698	NDUFA5(1)
	1	mice-tumour-7-F4-2-ex2_FS-65V.10743.10743.3.1.dta	3	1758.94	0.000249112	0.410547	-0.004519	-2.56916	0.00010235	0.000423969
161	DRKVMEYENR(3)-PKDMGFTR(2)	2444.17	Oxidation[M](5)	NP_006068 GeneID:10367 MICU1(110)-NP_006068 GeneID:10367 MICU1(451)/NP_006068 GeneID:10367 MICU1(110)-NP_001182448 GeneID:10367 MICU1(251)/NP_006068 GeneID:10367 MICU1(110)-NP_001182447 GeneID:10367 MICU1(449)/NP_001182447 GeneID:10367 MICU1(110)-NP_006068 GeneID:10367 MICU1(451)/NP_001182447 GeneID:10367 MICU1(110)-NP_001182448 GeneID:10367 MICU1(251)/NP_001182447 GeneID:10367 MICU1(110)-NP_0011…	Intra-Protein							NP_006068	GeneID:10367	MICU1(110)	NP_006068	GeneID:10367	MICU1(451)
	1	mice-tumour-7-F4-3-ex2_FS-45v.23128.23128.3.2.dta	3	2444.16	1	0.260094	-0.010942	-4.47678	1	0.0495973
162	DSFPNFLACKQER(10)-MKEFER(2)	2588.23	Carbamidomethyl[C](9)	NP_004137 GeneID:4713 NDUFB7(81)-NP_004137 GeneID:4713 NDUFB7(100)/	Intra-Protein							NP_004137	GeneID:4713	NDUFB7(81)	NP_004137	GeneID:4713	NDUFB7(100)
	1	mice-tumour-7-F16-1-ex2_FS-45v.20802.20802.4.1.dta	4	2588.23	1.50574e-07	0.108837	0.005408	2.08946	9.11516e-08	4.00727e-07
163	DSGNKPPGLLPR(5)-KGLYMANDLK(1)	2540.35	null	NP_001137152 GeneID:373156 GSTK1(54)-NP_001137152 GeneID:373156 GSTK1(62)/NP_001137152 GeneID:373156 GSTK1(54)-NP_001137151 GeneID:373156 GSTK1(62)/NP_001137152 GeneID:373156 GSTK1(54)-NP_057001 GeneID:373156 GSTK1(62)/NP_001137151 GeneID:373156 GSTK1(54)-NP_001137152 GeneID:373156 GSTK1(62)/NP_001137151 GeneID:373156 GSTK1(54)-NP_001137151 GeneID:373156 GSTK1(62)/NP_001137151 GeneID:373156 GSTK1…	Intra-Protein							NP_057001	GeneID:373156	GSTK1(54)	NP_057001	GeneID:373156	GSTK1(62)
	1	mice-tumour-7-F10-1-ex2_FS-65v.21952.21952.4.1.dta	4	2540.35	0.00121893	0.00859749	-0.000391	-0.153916	0.00160896	0.000109323
164	DTPENNPDTPFDFTPENYKR(19)-IEAIVKNYPEGHK(6)	4031.93	null	NP_066552 GeneID:4729 NDUFV2(61)-NP_066552 GeneID:4729 NDUFV2(68)/	Intra-Protein							NP_066552	GeneID:4729	NDUFV2(61)	NP_066552	GeneID:4729	NDUFV2(68)
	1	mice-tumour-7-F1-3-ex2_FS-45V.21372.21372.5.0.dta	5	4031.93	3.13413e-07	0.00148881	0.002023	0.501745	1.96819e-07	2.712e-07
	2	mice-tumour-7-F1-2-ex2_FS-45V.21412.21412.5.0.dta	5	4031.94	5.84254e-06	0.013464	0.005538	1.37354	0.00046952	9.75721e-08
	3	mice-tumour-7-F1-1-ex2_FS-45.21437.21437.5.0.dta	5	4031.93	8.3764e-05	0.0178395	-0.000508	-0.125994	0.00686886	6.58443e-07
	4	mice-tumour-7-F1-1-ex2_FS-45.21375.21375.5.0.dta	5	4031.93	0.000450027	0.0306257	0.001193	0.295888	0.00120349	5.97888e-08
	5	mice-tumour-7-F1-1-ex2_FS-45.21529.21529.5.0.dta	5	4031.93	0.937134	0.146201	-0.004074	-1.01043	1	0.0228006
165	DVFTKGYGFGLIK(5)-LDLKTK(4)	2299.29	null	NP_003365 GeneID:7416 VDAC1(20)-NP_003365 GeneID:7416 VDAC1(32)/	Intra-Protein							NP_003365	GeneID:7416	VDAC1(20)	NP_003365	GeneID:7416	VDAC1(32)
	1	mice-tumour-7-F17-3-ex2_FS-65v.27316.27316.3.0.dta	3	2299.29	0.17765	0.286362	-0.004224	-1.83709	2.87733e-07	0.151487
166	DVKFGADAR(3)-SIDLKDK(5)	1934.02	null	NP_002147 GeneID:3329 HSPD1(31)-NP_002147 GeneID:3329 HSPD1(87)/NP_002147 GeneID:3329 HSPD1(31)-NP_955472 GeneID:3329 HSPD1(87)/NP_955472 GeneID:3329 HSPD1(31)-NP_002147 GeneID:3329 HSPD1(87)/NP_955472 GeneID:3329 HSPD1(31)-NP_955472 GeneID:3329 HSPD1(87)/	Intra-Protein							NP_002147	GeneID:3329	HSPD1(31)	NP_002147	GeneID:3329	HSPD1(87)
	1	mice-tumour-7-F17-3-ex2_FS-45v.13592.13592.4.0.dta	4	1934.02	0.531176	0.0667101	-0.006251	-3.23212	0.00981547	0.675713
	2	mice-tumour-7-F17-3-ex2_FS-45v.13531.13531.4.1.dta	4	1934.01	0.508867	0.380981	-0.008546	-4.41877	0.154777	1
167	DVKFGADAR(3)-YKNIGAK(2)	1909.02	null	NP_002147 GeneID:3329 HSPD1(31)-NP_002147 GeneID:3329 HSPD1(91)/NP_002147 GeneID:3329 HSPD1(31)-NP_955472 GeneID:3329 HSPD1(91)/NP_955472 GeneID:3329 HSPD1(31)-NP_002147 GeneID:3329 HSPD1(91)/NP_955472 GeneID:3329 HSPD1(31)-NP_955472 GeneID:3329 HSPD1(91)/	Intra-Protein							NP_002147	GeneID:3329	HSPD1(31)	NP_002147	GeneID:3329	HSPD1(91)
	1	mice-tumour-7-F7-1-ex2_FS-45V.9491.9491.4.0.dta	4	1909.02	4.23975e-05	1.22724e-09	-0.000206	-0.107909	2.52041e-05	8.90532e-05
	2	mice-tumour-7-F8-2-ex2_FS45V.9527.9527.4.0.dta	4	1909.01	1.89056e-05	1.19196e-07	-0.002717	-1.42325	4.15283e-08	0.000128286
	3	mice-tumour-7-F7-2-ex2_FS-45V.9381.9381.4.0.dta	4	1909.01	0.0017383	1.22227e-06	-0.002976	-1.55892	0.000114331	0.00961414
	4	mice-tumour-7-F8-3-ex2_FS-45v.9824.9824.4.0.dta	4	1909.02	3.22239e-06	5.65403e-05	-0.001927	-1.00942	5.99908e-09	9.0434e-05
	5	mice-tumour-7-F8-1-ex2_FS-45V.9604.9604.4.0.dta	4	1909.01	9.16772e-06	0.00285356	-0.003257	-1.70611	5.78839e-11	0.000170693
	6	mice-tumour-7-F7-3-ex2_FS-45V.9503.9503.4.2.dta	4	1909.02	0.000112851	0.0180057	-0.00039	-0.204294	3.85447e-05	0.00140027
	7	mice-tumour-7-F8-1-ex2_FS-45V.9678.9678.4.0.dta	4	1909.01	0.00218535	0.0446958	-0.003058	-1.60187	7.39529e-05	0.0124028
168	DVKLPVQLQR(3)-KVLDKFYKR(8)	2529.49	null	NP_004090 GeneID:2040 STOM(198)-NP_003162 GeneID:6832 SUPV3L1(102)/	Inter-Protein							NP_004090	GeneID:2040	STOM(198)	NP_003162	GeneID:6832	SUPV3L1(102)
	1	mice-tumour-7-F6-1-ex2_FS-45v.24375.24375.3.1.dta	3	2529.49	1	0.202608	-0.006246	-2.46927	0.0223981	0.734716
169	DVLAGSKR(7)-ENDPKR(5)	1740.92	null	NP_060867 GeneID:55349 CHDH(82)-NP_060530 GeneID:55699 IARS2(815)/	Inter-Protein							NP_060867	GeneID:55349	CHDH(82)	NP_060530	GeneID:55699	IARS2(815)
	1	mice-tumour-7-F10-2-ex2_FS-65v.29461.29461.3.0.dta	3	1740.92	1	0.426261	-0.000271	-0.155664	0.470826	1
170	DYNHWLATKSLGQWLQEEK(9)-DKGTMLGK(2)	3332.66	null	NP_001116105 GeneID:1373 CPS1(153)-NP_001116105 GeneID:1373 CPS1(182)/NP_001116105 GeneID:1373 CPS1(153)-NP_001866 GeneID:1373 CPS1(176)/NP_001866 GeneID:1373 CPS1(147)-NP_001116105 GeneID:1373 CPS1(182)/NP_001866 GeneID:1373 CPS1(147)-NP_001866 GeneID:1373 CPS1(176)/	Intra-Protein							NP_001866	GeneID:1373	CPS1(147)	NP_001866	GeneID:1373	CPS1(176)
	1	mice-tumour-7-F19-1-ex2_FS-45v.27544.27544.4.0.dta	4	3332.68	1.35848e-05	0.00408516	0.013448	4.03521	2.66275e-05	3.6737e-05
	2	mice-tumour-7-F19-3-ex2_FS-45v.27431.27431.4.1.dta	4	3332.68	7.87187e-05	0.0149044	0.016073	4.82287	2.16073e-05	6.5031e-05
	3	mice-tumour-7-F19-2-ex2_FS-45v.27520.27520.4.1.dta	4	3332.67	0.0015578	0.0371373	0.010722	3.21725	2.94361e-05	0.000357646
	4	mice-tumour-7-F19-3-ex2_FS-45v.27507.27507.4.2.dta	4	3332.67	0.427285	0.148113	0.006095	1.82887	0.00181902	0.372894
171	EAFLKK(5)-SCEDGR(1)	1595.77	Carbamidomethyl[C](11)	NP_001924 GeneID:1743 DLST(272)-NP_003321 GeneID:7296 TXNRD1(2)/	Inter-Protein							NP_001924	GeneID:1743	DLST(272)	NP_003321	GeneID:7296	TXNRD1(2)
	1	mice-tumour-7-F3-1-ex2_FS-65v.8210.8210.3.2.dta	3	1595.77	0.269428	0.395077	0.000502	0.314581	0.000497117	0.616556
172	ECHSMDTEKSR(9)-NPDSKYK(5)	2368.05	Carbamidomethyl[C](2)	NP_056193 GeneID:55187 VPS13D(3139)-NP_056193 GeneID:55187 VPS13D(1684)/NP_056193 GeneID:55187 VPS13D(3139)-NP_060626 GeneID:55187 VPS13D(1684)/NP_060626 GeneID:55187 VPS13D(3114)-NP_056193 GeneID:55187 VPS13D(1684)/NP_060626 GeneID:55187 VPS13D(3114)-NP_060626 GeneID:55187 VPS13D(1684)/	Intra-Protein							NP_060626	GeneID:55187	VPS13D(3114)	NP_060626	GeneID:55187	VPS13D(1684)
	1	mice-tumour-7-F1-2-ex2_FS-65V.14895.14895.3.3.dta	3	2368.06	0.023714	0.340712	0.006171	2.60594	0.027101	0.0435206
173	ECSDVQPKLWAR(8)-GVGAKLGLR(5)	2496.34	Carbamidomethyl[C](2)	NP_002479 GeneID:4695 NDUFA2(64)-NP_002479 GeneID:4695 NDUFA2(13)/NP_002479 GeneID:4695 NDUFA2(64)-NP_001171941 GeneID:4695 NDUFA2(13)/NP_001171941 GeneID:4695 NDUFA2(64)-NP_002479 GeneID:4695 NDUFA2(13)/NP_001171941 GeneID:4695 NDUFA2(64)-NP_001171941 GeneID:4695 NDUFA2(13)/	Intra-Protein							NP_002479	GeneID:4695	NDUFA2(64)	NP_002479	GeneID:4695	NDUFA2(13)
	1	mice-tumour-7-F9-2-ex2_FS-65V.22574.22574.4.0.dta	4	2496.33	0.00085288	0.000196204	-0.004194	-1.68006	7.00299e-05	0.00114305
	2	mice-tumour-7-F9-3-ex2_FS-65v.22712.22712.4.0.dta	4	2496.33	0.065184	0.00206778	-0.004387	-1.75737	0.000620789	0.0116726
	3	mice-tumour-7-F9-1-ex2_FS-65v.22856.22856.4.0.dta	4	2496.35	0.844471	0.317789	0.006929	2.77567	0.560207	0.936171
174	EDEIPETVSLEMLDAAKNK(17)-KILIWSGR(1)	3241.7	null	NP_055182 GeneID:26355 FAM162A(96)-NP_055182 GeneID:26355 FAM162A(69)/	Intra-Protein							NP_055182	GeneID:26355	FAM162A(96)	NP_055182	GeneID:26355	FAM162A(69)
	1	mice-tumour-7-F20-1-ex2_FS-65v.30562.30562.4.0.dta	4	3241.7	1.15846e-09	0.0297741	-0.00727	-2.24265	0.000210295	1.4886e-11
	2	mice-tumour-7-F1-1-ex2_FS-65v.32341.32341.4.0.dta	4	3241.69	1	0.0305703	-0.011084	-3.41919	1	1
175	EDEIPETVSLEMLDAAKNK(17)-VPLHKPTDWQK(5)	3617.84	null	NP_055182 GeneID:26355 FAM162A(96)-NP_055182 GeneID:26355 FAM162A(62)/	Intra-Protein							NP_055182	GeneID:26355	FAM162A(96)	NP_055182	GeneID:26355	FAM162A(62)
	1	mice-tumour-7-F1-3-ex2_FS-45V.25850.25850.5.0.dta	5	3617.85	0.216633	0.0747171	0.00728	2.01225	0.237901	0.0914043
176	EDPNLVPSISNKR(12)-EIMLAAKK(7)	2509.37	null	NP_001853 GeneID:1329 COX5B(86)-NP_001853 GeneID:1329 COX5B(56)/	Intra-Protein							NP_001853	GeneID:1329	COX5B(86)	NP_001853	GeneID:1329	COX5B(56)
	1	mice-tumour-7-F12-1-ex2_FS-45v.18999.18999.3.0.dta	3	2509.36	1.17603e-09	0.112955	-0.006608	-2.63333	7.83834e-08	6.74916e-09
	2	mice-tumour-7-F12-3-ex2_FS-45V.18737.18737.3.0.dta	3	2509.36	2.69073e-06	0.18893	-0.006695	-2.668	1.28465e-05	5.38089e-06
177	EEAYNSLMKSYVSEK(9)-DVTSAKALYEHLTAK(6)	3561.77	null	NP_573566 GeneID:10128 LRPPRC(1326)-NP_573566 GeneID:10128 LRPPRC(1338)/	Intra-Protein							NP_573566	GeneID:10128	LRPPRC(1326)	NP_573566	GeneID:10128	LRPPRC(1338)
	1	mice-tumour-7-F20-3-ex2_FS-45v.24335.24335.4.1.dta	4	3561.78	0.00376806	0.000519025	0.009052	2.54143	0.00539827	0.00733744
	2	mice-tumour-7-F20-2-ex2_FS-45v.24278.24278.4.0.dta	4	3561.78	0.00693573	0.00175498	0.013313	3.73775	0.00243571	0.00535445
	3	mice-tumour-7-F20-1-ex2_FS-45v.24447.24447.4.2.dta	4	3561.78	0.000357276	0.022071	0.013913	3.90621	0.000941397	0.000206763
	4	mice-tumour-7-F20-1-ex2_FS-45v.24424.24424.4.2.dta	4	3561.78	0.0213522	0.0616459	0.013913	3.90621	0.00954929	0.00588324
	5	mice-tumour-7-F19-2-ex2_FS-45v.24476.24476.4.2.dta	4	3561.77	1	0.167093	0.002762	0.775458	1	1
178	EEDIGKR(6)-MAAAAGR(1)	1630.82	null	NP_056538 GeneID:50640 PNPLA8(186)-NP_612366 GeneID:90550 MCU(1)/NP_056538 GeneID:50640 PNPLA8(186)-NP_001257608 GeneID:90550 MCU(1)/NP_001242937 GeneID:50640 PNPLA8(186)-NP_612366 GeneID:90550 MCU(1)/NP_001242937 GeneID:50640 PNPLA8(186)-NP_001257608 GeneID:90550 MCU(1)/NP_001242936 GeneID:50640 PNPLA8(186)-NP_612366 GeneID:90550 MCU(1)/NP_001242936 GeneID:50640 PNPLA8(186)-NP_001257608 GeneID:9…	Inter-Protein							NP_612366	GeneID:90550	MCU(1)	NP_056538	GeneID:50640	PNPLA8(186)
	1	mice-tumour-7-F17-1-ex2_FS-45v.15647.15647.3.0.dta	3	1630.82	0.108153	0.460274	-0.001239	-0.75974	0.00176221	0.233252
179	EEGLKAFYK(5)-DAAPKMYK(5)	2145.09	null	NP_998776 GeneID:5250 SLC25A3(213)-NP_998776 GeneID:5250 SLC25A3(205)/NP_998776 GeneID:5250 SLC25A3(213)-NP_002626 GeneID:5250 SLC25A3(205)/NP_998776 GeneID:5250 SLC25A3(213)-NP_005879 GeneID:5250 SLC25A3(206)/NP_002626 GeneID:5250 SLC25A3(213)-NP_998776 GeneID:5250 SLC25A3(205)/NP_002626 GeneID:5250 SLC25A3(213)-NP_002626 GeneID:5250 SLC25A3(205)/NP_002626 GeneID:5250 SLC25A3(213)-NP_005879 Gene…	Intra-Protein							NP_005879	GeneID:5250	SLC25A3(214)	NP_005879	GeneID:5250	SLC25A3(206)
	1	mice-tumour-7-F16-2-ex2_FS-65v.16913.16913.4.0.dta	4	2145.09	0.0512749	0.00921304	-0.003389	-1.57988	0.000609857	0.0883719
	2	mice-tumour-7-F17-3-ex2_FS-65v.16232.16232.4.0.dta	4	2145.09	0.210957	0.0567	-0.000969	-0.451729	0.00524301	0.280479
	3	mice-tumour-7-F17-3-ex2_FS-65v.16197.16197.4.0.dta	4	2145.09	0.0199257	0.0573139	-0.000969	-0.451729	0.000234333	0.0416267
	4	mice-tumour-7-F16-1-ex2_FS-65v.16922.16922.4.0.dta	4	2145.09	0.0296281	0.176399	-0.002752	-1.28293	0.00165421	0.0213002
	5	mice-tumour-7-F17-1-ex2_FS-65v.16144.16144.4.0.dta	4	2145.09	0.156905	0.333124	-0.002909	-1.35612	3.9042e-05	0.092959
180	EEHHEK(6)-NAEEKK(5)	1663.79	null	NP_054737 GeneID:28957 MRPS28(187)-NP_056538 GeneID:50640 PNPLA8(343)/NP_054737 GeneID:28957 MRPS28(187)-NP_001242937 GeneID:50640 PNPLA8(343)/NP_054737 GeneID:28957 MRPS28(187)-NP_001242936 GeneID:50640 PNPLA8(343)/NP_054737 GeneID:28957 MRPS28(187)-NP_001242939 GeneID:50640 PNPLA8(243)/NP_054737 GeneID:28957 MRPS28(187)-NP_001242938 GeneID:50640 PNPLA8(343)/NP_054737 GeneID:28957 MRPS28(187)-NP…	Inter-Protein							NP_054737	GeneID:28957	MRPS28(187)	NP_056538	GeneID:50640	PNPLA8(343)
	1	mice-tumour-7-F6-3-ex2_FS-65v.4475.4475.2.0.dta	2	1663.79	0.068695	0.318895	-0.000907	-0.54514	0.16307	5.26206e-05
181	EEIFGPVQPLFKFK(12)-KIEEVVER(1)	2817.54	null	NP_000683 GeneID:219 ALDH1B1(426)-NP_000683 GeneID:219 ALDH1B1(429)/	Intra-Protein							NP_000683	GeneID:219	ALDH1B1(426)	NP_000683	GeneID:219	ALDH1B1(429)
	1	mice-tumour-7-F20-3-ex2_FS-45v.27181.27181.4.1.dta	4	2817.55	0.00140373	0.0944553	0.004199	1.4903	0.0180516	0.00872361
182	EFAAKIIEEEER(5)-HLDLASLKSIR(8)	2853.54	null	NP_001139443 GeneID:112724 RDH13(110)-NP_001139443 GeneID:112724 RDH13(102)/NP_001139443 GeneID:112724 RDH13(110)-NP_612421 GeneID:112724 RDH13(31)/NP_612421 GeneID:112724 RDH13(39)-NP_001139443 GeneID:112724 RDH13(102)/NP_612421 GeneID:112724 RDH13(39)-NP_612421 GeneID:112724 RDH13(31)/	Intra-Protein							NP_001139443	GeneID:112724	RDH13(110)	NP_001139443	GeneID:112724	RDH13(102)
	1	mice-tumour-7-F20-2-ex2_FS-65v.25780.25780.4.0.dta	4	2853.52	1	0.040621	-0.013804	-4.83751	0.0609295	1
183	EFAQIIKIGR(7)-LHDALDAKSK(8)	2409.35	null	NP_000134 GeneID:2271 FH(230)-NP_000134 GeneID:2271 FH(221)/	Intra-Protein							NP_000134	GeneID:2271	FH(230)	NP_000134	GeneID:2271	FH(221)
	1	mice-tumour-7-F17-3-ex2_FS-45v.17104.17104.3.0.dta	3	2409.35	7.80648e-09	5.53452e-06	-0.001089	-0.451989	1.11745e-11	3.36484e-09
	2	mice-tumour-7-F14-2-ex2_FS-65V.19015.19015.4.0.dta	4	2409.35	0.000378304	0.000137695	-0.004411	-1.83078	5.86734e-05	0.000295487
	3	mice-tumour-7-F17-3-ex2_FS-65v.18140.18140.4.0.dta	4	2409.35	2.77848e-05	0.00163144	-0.000699	-0.29012	0.000123649	1.30318e-08
	4	mice-tumour-7-F14-3-ex2_FS-65V.18927.18927.4.0.dta	4	2409.35	0.000379177	0.00273559	-0.004727	-1.96194	0.00128561	3.63525e-05
	5	mice-tumour-7-F17-1-ex2_FS-65v.18091.18091.4.0.dta	4	2409.35	5.05171e-07	0.00739881	-0.000813	-0.337435	3.08602e-06	5.38849e-07
	6	mice-tumour-7-F17-2-ex2_FS-45v.17223.17223.3.0.dta	3	2409.34	1.69386e-08	0.00836466	-0.006429	-2.66836	1.08566e-09	4.1919e-07
	7	mice-tumour-7-F17-2-ex2_FS-65v.18120.18120.4.0.dta	4	2409.35	0.000300685	0.0325634	7.1e-05	0.029469	0.000830881	7.17262e-08
	8	mice-tumour-7-F14-1-ex2_FS-65V.19030.19030.4.0.dta	4	2409.34	0.00255567	0.0754414	-0.004915	-2.03997	0.00351874	2.53392e-05
184	EFELSKLQQR(6)-ALSLLKK(6)	2187.27	null	NP_004784 GeneID:9361 LONP1(374)-NP_004784 GeneID:9361 LONP1(367)/NP_004784 GeneID:9361 LONP1(374)-NP_001263409 GeneID:9361 LONP1(171)/NP_004784 GeneID:9361 LONP1(374)-NP_001263408 GeneID:9361 LONP1(303)/NP_001263409 GeneID:9361 LONP1(178)-NP_004784 GeneID:9361 LONP1(367)/NP_001263409 GeneID:9361 LONP1(178)-NP_001263409 GeneID:9361 LONP1(171)/NP_001263409 GeneID:9361 LONP1(178)-NP_001263408 GeneI…	Intra-Protein							NP_004784	GeneID:9361	LONP1(374)	NP_004784	GeneID:9361	LONP1(367)
	1	mice-tumour-7-F13-3-ex2_FS-65V.23441.23441.3.0.dta	3	2187.27	9.29236e-10	6.6253e-07	-0.001465	-0.669783	0.000213856	1.01108e-09
	2	mice-tumour-7-F13-2-ex2_FS-65V.23509.23509.3.0.dta	3	2187.27	2.49984e-05	3.76402e-05	-0.000485	-0.221737	2.47755e-06	9.22949e-07
	3	mice-tumour-7-F13-2-ex2_FS-65V.23476.23476.3.0.dta	3	2187.27	1.75243e-05	8.68258e-05	-0.000475	-0.217165	0.000126144	1.32623e-05
	4	mice-tumour-7-F13-3-ex2_FS-65V.23475.23475.3.0.dta	3	2187.27	0.000240548	0.000104723	-0.001654	-0.756192	1.40501e-05	0.000437579
	5	mice-tumour-7-F13-1-ex2_FS-65V.23570.23570.3.0.dta	3	2187.27	1.49946e-08	0.000399311	-0.003375	-1.54302	9.15877e-06	5.6344e-08
	6	mice-tumour-7-F13-1-ex2_FS-65V.23546.23546.3.0.dta	3	2187.27	6.6357e-07	0.00140298	-0.003375	-1.54302	3.26304e-05	7.24635e-06
	7	mice-tumour-7-F13-2-ex2_FS-45V.22247.22247.4.0.dta	4	2187.27	0.0137463	0.375351	-0.002524	-1.15395	0.00149451	0.00905989
185	EFPKFFTFR(4)-DKFEEDR(2)	2294.11	null	NP_001084 GeneID:32 ACACB(1473)-NP_942133 GeneID:31 ACACA(1363)/NP_001084 GeneID:32 ACACB(1473)-NP_942135 GeneID:31 ACACA(1285)/NP_001084 GeneID:32 ACACB(1473)-NP_942134 GeneID:31 ACACA(1305)/NP_001084 GeneID:32 ACACB(1473)-NP_942131 GeneID:31 ACACA(1400)/NP_001084 GeneID:32 ACACB(1473)-NP_942136 GeneID:31 ACACA(1363)/NP_942133 GeneID:31 ACACA(1354)-NP_942133 GeneID:31 ACACA(1363)/NP_942133 GeneI…	Intra-Protein							NP_001084	GeneID:32	ACACB(1473)	NP_942134	GeneID:31	ACACA(1305)
												NP_942134	GeneID:31	ACACA(1296)	NP_942134	GeneID:31	ACACA(1305)
	1	mice-tumour-7-F20-1-ex2_FS-65v.28203.28203.4.0.dta	4	2294.11	0.970379	0.316176	-0.003978	-1.734	1	0.408337
186	EFTEAVEAKQVAQQEAER(9)-AEQQKK(5)	2931.47	null	NP_002625 GeneID:5245 PHB(186)-NP_002625 GeneID:5245 PHB(207)/NP_002625 GeneID:5245 PHB(186)-NP_001268425 GeneID:5245 PHB(207)/NP_002625 GeneID:5245 PHB(186)-NP_001268644 GeneID:5245 PHB(207)/NP_001268425 GeneID:5245 PHB(186)-NP_002625 GeneID:5245 PHB(207)/NP_001268425 GeneID:5245 PHB(186)-NP_001268425 GeneID:5245 PHB(207)/NP_001268425 GeneID:5245 PHB(186)-NP_001268644 GeneID:5245 PHB(207)/NP_001…	Intra-Protein							NP_002625	GeneID:5245	PHB(186)	NP_002625	GeneID:5245	PHB(207)
	1	mice-tumour-7-F19-1-ex2_FS-45v.13826.13826.4.1.dta	4	2931.47	1	0.0780458	-0.001733	-0.591171	0.000210017	0.382949
	2	mice-tumour-7-F19-2-ex2_FS-45v.13785.13785.4.1.dta	4	2931.47	0.805742	0.185215	-0.003803	-1.2973	0.000107401	0.609689
187	EFTEAVEAKQVAQQEAER(9)-FVVEKAEQQK(5)	3405.72	null	NP_002625 GeneID:5245 PHB(186)-NP_002625 GeneID:5245 PHB(202)/NP_002625 GeneID:5245 PHB(186)-NP_001268425 GeneID:5245 PHB(202)/NP_002625 GeneID:5245 PHB(186)-NP_001268644 GeneID:5245 PHB(202)/NP_001268425 GeneID:5245 PHB(186)-NP_002625 GeneID:5245 PHB(202)/NP_001268425 GeneID:5245 PHB(186)-NP_001268425 GeneID:5245 PHB(202)/NP_001268425 GeneID:5245 PHB(186)-NP_001268644 GeneID:5245 PHB(202)/NP_001…	Intra-Protein							NP_002625	GeneID:5245	PHB(186)	NP_002625	GeneID:5245	PHB(202)
	1	mice-tumour-7-F20-2-ex2_FS-45v.18658.18658.4.1.dta	4	3405.71	0.00494493	7.96059e-06	-0.004456	-1.30839	4.89015e-09	0.00161284
	2	mice-tumour-7-F20-3-ex2_FS-45v.18656.18656.4.1.dta	4	3405.71	0.00845768	5.99104e-05	-0.004437	-1.30281	1.19857e-09	0.00101527
	3	mice-tumour-7-F1-3-ex2_FS-45V.19083.19083.4.0.dta	4	3405.72	5.18546e-05	0.000142158	0.002286	0.671224	2.46353e-09	2.77945e-05
	4	mice-tumour-7-F1-2-ex2_FS-45V.19166.19166.4.0.dta	4	3405.72	0.000361675	0.000385806	0.006261	1.83838	2.07933e-08	0.000161604
	5	mice-tumour-7-F20-3-ex2_FS-45v.18698.18698.4.2.dta	4	3405.71	0.0384536	0.000455787	-0.004437	-1.30281	2.75251e-05	0.0138428
	6	mice-tumour-7-F20-1-ex2_FS-45v.18759.18759.4.1.dta	4	3405.71	1.08295e-05	0.00374866	-0.008329	-2.44559	8.43721e-09	0.000100837
	7	mice-tumour-7-F1-2-ex2_FS-45V.19177.19177.4.0.dta	4	3405.72	0.0238137	0.0116888	0.006261	1.83838	0.00480964	0.0228249
	8	mice-tumour-7-F1-1-ex2_FS-45.19116.19116.4.0.dta	4	3405.72	0.000638883	0.0153079	0.002698	0.792197	1.77303e-09	0.000106093
	9	mice-tumour-7-F20-3-ex2_FS-45v.18690.18690.4.2.dta	4	3405.71	0.00578473	0.0272316	-0.004437	-1.30281	0.000451387	0.000535267
188	EFTEAVEAKQVAQQEAER(9)-ISSPTGSKDLQMVNISLR(8)	4146.1	null	NP_002625 GeneID:5245 PHB(186)-NP_001138303 GeneID:11331 PHB2(97)/NP_002625 GeneID:5245 PHB(186)-NP_001254629 GeneID:11331 PHB2(97)/NP_001268425 GeneID:5245 PHB(186)-NP_001138303 GeneID:11331 PHB2(97)/NP_001268425 GeneID:5245 PHB(186)-NP_001254629 GeneID:11331 PHB2(97)/NP_001268644 GeneID:5245 PHB(186)-NP_001138303 GeneID:11331 PHB2(97)/NP_001268644 GeneID:5245 PHB(186)-NP_001254629 GeneID:11331 …	Inter-Protein							NP_001138303	GeneID:11331	PHB2(97)	NP_002625	GeneID:5245	PHB(186)
	1	mice-tumour-7-F20-3-ex2_FS-45v.24694.24694.4.0.dta	4	4146.1	0.014836	0.00069942	0.002191	0.528448	8.35444e-10	0.00262558
	2	mice-tumour-7-F19-1-ex2_FS-45v.24797.24797.4.1.dta	4	4146.1	0.00415385	0.00376829	0.000512	0.123489	6.15107e-11	0.00374232
	3	mice-tumour-7-F20-3-ex2_FS-45v.24682.24682.4.0.dta	4	4146.1	0.000824957	0.0551765	0.002191	0.528448	7.27194e-10	2.04806e-05
	4	mice-tumour-7-F20-1-ex2_FS-45v.24759.24759.4.0.dta	4	4146.1	4.25381e-11	0.103646	9.6e-05	0.023154	6.47945e-08	1.02324e-05
	5	mice-tumour-7-F19-2-ex2_FS-45v.24798.24798.4.0.dta	4	4146.1	0.00122538	0.274281	-0.002117	-0.5106	4.38232e-08	7.20025e-05
	6	mice-tumour-7-F19-3-ex2_FS-45v.24751.24751.4.0.dta	4	4146.11	0.00165164	0.31481	0.002992	0.721642	1.3159e-07	9.75047e-06
	7	mice-tumour-7-F20-1-ex2_FS-45v.24745.24745.4.0.dta	4	4146.1	0.486867	0.445454	9.6e-05	0.023154	0.00455757	1
189	EFTEAVEAKQVAQQEAER(9)-KAAIISAEGDSK(1)	3389.71	null	NP_002625 GeneID:5245 PHB(186)-NP_002625 GeneID:5245 PHB(208)/NP_002625 GeneID:5245 PHB(186)-NP_001268425 GeneID:5245 PHB(208)/NP_002625 GeneID:5245 PHB(186)-NP_001268644 GeneID:5245 PHB(208)/NP_001268425 GeneID:5245 PHB(186)-NP_002625 GeneID:5245 PHB(208)/NP_001268425 GeneID:5245 PHB(186)-NP_001268425 GeneID:5245 PHB(208)/NP_001268425 GeneID:5245 PHB(186)-NP_001268644 GeneID:5245 PHB(208)/NP_001…	Intra-Protein							NP_002625	GeneID:5245	PHB(186)	NP_002625	GeneID:5245	PHB(208)
	1	mice-tumour-7-F20-3-ex2_FS-45v.18249.18249.4.1.dta	4	3389.7	5.54407e-07	4.89007e-05	-0.011104	-3.2758	2.06111e-11	7.32782e-10
	2	mice-tumour-7-F20-2-ex2_FS-45v.18230.18230.4.0.dta	4	3389.7	1.12019e-06	8.10794e-05	-0.010884	-3.2109	8.62972e-11	3.5483e-07
	3	mice-tumour-7-F20-3-ex2_FS-45v.18334.18334.4.1.dta	4	3389.7	0.123137	0.0220126	-0.01054	-3.10941	0.0413096	0.028293
	4	mice-tumour-7-F20-1-ex2_FS-45v.18366.18366.4.0.dta	4	3389.7	9.37937e-12	0.0229184	-0.01161	-3.42508	2.00497e-19	2.79358e-07
190	EFTEAVEAKQVAQQEAER(9)-KLEAAEDIAYQLSR(1)	3806.91	null	NP_002625 GeneID:5245 PHB(186)-NP_002625 GeneID:5245 PHB(240)/NP_002625 GeneID:5245 PHB(186)-NP_001268425 GeneID:5245 PHB(240)/NP_002625 GeneID:5245 PHB(186)-NP_001268644 GeneID:5245 PHB(240)/NP_001268425 GeneID:5245 PHB(186)-NP_002625 GeneID:5245 PHB(240)/NP_001268425 GeneID:5245 PHB(186)-NP_001268425 GeneID:5245 PHB(240)/NP_001268425 GeneID:5245 PHB(186)-NP_001268644 GeneID:5245 PHB(240)/NP_001…	Intra-Protein							NP_002625	GeneID:5245	PHB(186)	NP_002625	GeneID:5245	PHB(240)
	1	mice-tumour-7-F1-3-ex2_FS-45V.25632.25632.4.1.dta	4	3806.9	5.15172e-09	4.17612e-05	-0.003422	-0.898892	4.4647e-09	1.18036e-10
	2	mice-tumour-7-F1-1-ex2_FS-45.25743.25743.4.3.dta	4	3806.91	0.00013021	0.00577825	-0.002689	-0.706347	0.0479608	1.31634e-06
191	EFTQGVKPDWTIAR(7)-IEHSKLLE(5)	2753.45	null	NP_078796 GeneID:79568 MAIP1(276)-NP_078796 GeneID:79568 MAIP1(288)/	Intra-Protein							NP_078796	GeneID:79568	MAIP1(276)	NP_078796	GeneID:79568	MAIP1(288)
	1	mice-tumour-7-F18-3-ex2_FS-45v.21702.21702.4.0.dta	4	2753.44	0.0265952	4.06655e-07	-0.012261	-4.45296	2.60327e-05	0.0383086
192	EGFEKISK(5)-KGVITVK(1)	1819.06	null	NP_002147 GeneID:3329 HSPD1(130)-NP_002147 GeneID:3329 HSPD1(196)/NP_002147 GeneID:3329 HSPD1(130)-NP_955472 GeneID:3329 HSPD1(196)/NP_955472 GeneID:3329 HSPD1(130)-NP_002147 GeneID:3329 HSPD1(196)/NP_955472 GeneID:3329 HSPD1(130)-NP_955472 GeneID:3329 HSPD1(196)/	Intra-Protein							NP_002147	GeneID:3329	HSPD1(130)	NP_002147	GeneID:3329	HSPD1(196)
	1	mice-tumour-7-F10-2-ex2_FS-65v.14231.14231.4.0.dta	4	1819.06	0.00303236	0.000659242	-0.00158	-0.868582	0.00268527	0.000215566
	2	mice-tumour-7-F10-3-ex2_FS-65v.14168.14168.4.0.dta	4	1819.06	0.0263055	0.00442302	-0.002206	-1.21272	0.00775669	1.06746e-05
193	EGFEKISK(5)-YKNIGAK(2)	1868.02	null	NP_002147 GeneID:3329 HSPD1(130)-NP_002147 GeneID:3329 HSPD1(91)/NP_002147 GeneID:3329 HSPD1(130)-NP_955472 GeneID:3329 HSPD1(91)/NP_955472 GeneID:3329 HSPD1(130)-NP_002147 GeneID:3329 HSPD1(91)/NP_955472 GeneID:3329 HSPD1(130)-NP_955472 GeneID:3329 HSPD1(91)/	Intra-Protein							NP_002147	GeneID:3329	HSPD1(130)	NP_002147	GeneID:3329	HSPD1(91)
	1	mice-tumour-7-F11-2-ex2_FS-65v.11646.11646.4.0.dta	4	1868.02	0.183515	0.0734339	0.000824	0.44111	0.612772	0.0034362
194	EGKLIMGIGHR(3)-VKSINNPDMR(2)	2521.34	null	NP_942127 GeneID:47 ACLY(958)-NP_942127 GeneID:47 ACLY(968)/NP_942127 GeneID:47 ACLY(958)-NP_001087 GeneID:47 ACLY(978)/NP_001087 GeneID:47 ACLY(968)-NP_942127 GeneID:47 ACLY(968)/NP_001087 GeneID:47 ACLY(968)-NP_001087 GeneID:47 ACLY(978)/	Intra-Protein							NP_942127	GeneID:47	ACLY(958)	NP_942127	GeneID:47	ACLY(968)
	1	mice-tumour-7-F6-1-ex2_FS-45v.13969.13969.4.1.dta	4	2521.33	1.20101e-09	0.000930349	-0.005099	-2.02234	4.06428e-14	2.61285e-09
	2	mice-tumour-7-F6-2-ex2_FS-45v.13888.13888.5.2.dta	5	2521.33	0.0514004	0.197726	-0.003651	-1.44804	0.125638	0.0891127
195	EGKLIMGIGHR(3)-VQILKDYVR(5)	2481.4	null	NP_942127 GeneID:47 ACLY(958)-NP_942127 GeneID:47 ACLY(981)/NP_942127 GeneID:47 ACLY(958)-NP_001087 GeneID:47 ACLY(991)/NP_001087 GeneID:47 ACLY(968)-NP_942127 GeneID:47 ACLY(981)/NP_001087 GeneID:47 ACLY(968)-NP_001087 GeneID:47 ACLY(991)/	Intra-Protein							NP_942127	GeneID:47	ACLY(958)	NP_942127	GeneID:47	ACLY(981)
	1	mice-tumour-7-F12-2-ex2_FS-65v.21979.21979.5.0.dta	5	2481.4	1	0.000320967	-0.001897	-0.764488	0.00037242	0.972454
	2	mice-tumour-7-F12-3-ex2_FS-65V.21724.21724.5.0.dta	5	2481.4	0.529237	0.0112952	-0.0008	-0.322399	1.46394e-06	0.325199
	3	mice-tumour-7-F12-1-ex2_FS-65v.22223.22223.5.2.dta	5	2481.4	1	0.537849	-0.001769	-0.712904	1	1
196	EGNDLYHEMIESGVINLKDATSK(18)-GPIKTK(4)	3343.71	null	NP_001677 GeneID:506 ATP5F1B(259)-NP_001677 GeneID:506 ATP5F1B(159)/	Intra-Protein							NP_001677	GeneID:506	ATP5F1B(259)	NP_001677	GeneID:506	ATP5F1B(159)
	1	mice-tumour-7-F19-1-ex2_FS-45v.26168.26168.4.1.dta	4	3343.69	1	0.221717	-0.016976	-5.077	1	1
	2	mice-tumour-7-F19-2-ex2_FS-45v.26088.26088.4.1.dta	4	3343.69	9.3968e-07	0.383171	-0.01772	-5.2995	0.0179331	6.56531e-06
197	EGSPEENKEMR(1)-MNSKIMSLSNK(4)	2727.26	Oxidation[M](10);Oxidation[M](15)	NP_942134 GeneID:31 ACACA(2)-NP_001073918 GeneID:1763 DNA2(832)/	Inter-Protein							NP_942134	GeneID:31	ACACA(2)	NP_001073918	GeneID:1763	DNA2(832)
	1	mice-tumour-7-F9-2-ex2_FS-45V.14193.14193.3.1.dta	3	2727.26	1	0.280568	-4.9e-05	-0.017967	1	1
198	EGVPKAEATR(5)-KIWMVDSK(1)	2217.16	Oxidation[M](17)	NP_001014811 GeneID:10873 ME3(359)-NP_001014811 GeneID:10873 ME3(365)/NP_001014811 GeneID:10873 ME3(359)-NP_006671 GeneID:10873 ME3(365)/NP_001014811 GeneID:10873 ME3(359)-NP_001155058 GeneID:10873 ME3(365)/NP_006671 GeneID:10873 ME3(359)-NP_001014811 GeneID:10873 ME3(365)/NP_006671 GeneID:10873 ME3(359)-NP_006671 GeneID:10873 ME3(365)/NP_006671 GeneID:10873 ME3(359)-NP_001155058 GeneID:10873 ME3…	Intra-Protein							NP_001014811	GeneID:10873	ME3(359)	NP_001014811	GeneID:10873	ME3(365)
	1	mice-tumour-7-F7-1-ex2_FS-65V.4263.4263.4.0.dta	4	2217.16	1	0.333645	0.0015	0.676542	1	1
199	EGVVECSFVKSQETECTYFSTPLLLGK(10)-GIEKNLGIGK(4)	4274.16	Carbamidomethyl[C](6);Carbamidomethyl[C](16)	NP_005909 GeneID:4191 MDH2(279)-NP_005909 GeneID:4191 MDH2(301)/NP_005909 GeneID:4191 MDH2(279)-NP_001269332 GeneID:4191 MDH2(259)/NP_005909 GeneID:4191 MDH2(279)-NP_001269333 GeneID:4191 MDH2(194)/NP_001269332 GeneID:4191 MDH2(237)-NP_005909 GeneID:4191 MDH2(301)/NP_001269332 GeneID:4191 MDH2(237)-NP_001269332 GeneID:4191 MDH2(259)/NP_001269332 GeneID:4191 MDH2(237)-NP_001269333 GeneID:4191 MDH2…	Intra-Protein							NP_005909	GeneID:4191	MDH2(279)	NP_005909	GeneID:4191	MDH2(301)
	1	mice-tumour-7-F20-2-ex2_FS-45v.28775.28775.4.0.dta	4	4274.16	0.000103564	8.54734e-05	0.002373	0.555197	1.12178e-10	3.38655e-06
	2	mice-tumour-7-F20-3-ex2_FS-45v.28823.28823.4.0.dta	4	4274.17	0.000550852	0.0319627	0.005195	1.21544	0.000566119	0.000117434
	3	mice-tumour-7-F20-1-ex2_FS-45v.28863.28863.4.0.dta	4	4274.17	0.0131512	0.185597	0.00985	2.30455	0.00635852	0.000481494
200	EIGFSDKQISK(7)-KNIHPWVK(1)	2410.31	null	NP_001116105 GeneID:1373 CPS1(921)-NP_001116105 GeneID:1373 CPS1(941)/NP_001116105 GeneID:1373 CPS1(921)-NP_001866 GeneID:1373 CPS1(935)/NP_001116105 GeneID:1373 CPS1(921)-NP_001116106 GeneID:1373 CPS1(484)/NP_001866 GeneID:1373 CPS1(915)-NP_001116105 GeneID:1373 CPS1(941)/NP_001866 GeneID:1373 CPS1(915)-NP_001866 GeneID:1373 CPS1(935)/NP_001866 GeneID:1373 CPS1(915)-NP_001116106 GeneID:1373 CPS1…	Intra-Protein							NP_001866	GeneID:1373	CPS1(915)	NP_001866	GeneID:1373	CPS1(935)
	1	mice-tumour-7-F13-3-ex2_FS-65V.16308.16308.5.0.dta	5	2410.31	0.000397416	3.29627e-05	-0.002197	-0.9115	0.000695129	2.20716e-07
201	EIGNIISDAMKK(11)-GVITVKDGK(6)	2372.31	null	NP_002147 GeneID:3329 HSPD1(191)-NP_002147 GeneID:3329 HSPD1(202)/NP_002147 GeneID:3329 HSPD1(191)-NP_955472 GeneID:3329 HSPD1(202)/NP_955472 GeneID:3329 HSPD1(191)-NP_002147 GeneID:3329 HSPD1(202)/NP_955472 GeneID:3329 HSPD1(191)-NP_955472 GeneID:3329 HSPD1(202)/	Intra-Protein							NP_002147	GeneID:3329	HSPD1(191)	NP_002147	GeneID:3329	HSPD1(202)
	1	mice-tumour-7-F17-2-ex2_FS-45v.20078.20078.3.0.dta	3	2372.3	0.00102498	0.179207	-0.00747	-3.14883	0.000310011	0.0016062
	2	mice-tumour-7-F17-1-ex2_FS-45v.20008.20008.3.1.dta	3	2372.3	0.000705219	0.27452	-0.008899	-3.7512	0.000263929	6.71831e-05
	3	mice-tumour-7-F17-3-ex2_FS-65v.21054.21054.4.0.dta	4	2372.31	0.145382	0.45989	-0.003489	-1.47072	0.215651	0.0673098
202	EIGNIISDAMKK(11)-KGVITVK(1)	2200.26	null	NP_002147 GeneID:3329 HSPD1(191)-NP_002147 GeneID:3329 HSPD1(196)/NP_002147 GeneID:3329 HSPD1(191)-NP_955472 GeneID:3329 HSPD1(196)/NP_955472 GeneID:3329 HSPD1(191)-NP_002147 GeneID:3329 HSPD1(196)/NP_955472 GeneID:3329 HSPD1(191)-NP_955472 GeneID:3329 HSPD1(196)/	Intra-Protein							NP_002147	GeneID:3329	HSPD1(191)	NP_002147	GeneID:3329	HSPD1(196)
	1	mice-tumour-7-F13-3-ex2_FS-65V.21458.21458.4.0.dta	4	2200.26	5.23069e-14	4.02367e-07	-0.002957	-1.34393	5.78541e-12	7.16922e-19
	2	mice-tumour-7-F13-2-ex2_FS-65V.21503.21503.4.0.dta	4	2200.26	9.64928e-12	7.56327e-06	-0.002236	-1.01624	3.08303e-09	2.77045e-12
	3	mice-tumour-7-F13-1-ex2_FS-65V.21609.21609.4.0.dta	4	2200.26	2.96983e-14	1.09792e-05	-0.003111	-1.41392	2.45484e-09	4.4094e-16
	4	mice-tumour-7-F13-1-ex2_FS-65V.21690.21690.3.0.dta	3	2200.26	8.12568e-15	1.9292e-05	1.1e-05	0.004999	7.3578e-13	8.79254e-13
	5	mice-tumour-7-F13-3-ex2_FS-65V.21573.21573.4.0.dta	4	2200.26	0.0049569	0.00311626	-0.002812	-1.27803	0.0061321	2.53094e-07
	6	mice-tumour-7-F13-2-ex2_FS-65V.21571.21571.3.0.dta	3	2200.26	0.00203071	0.0176133	0.00146	0.663557	0.0179184	0.0222449
	7	mice-tumour-7-F13-1-ex2_FS-65V.21650.21650.3.0.dta	3	2200.26	0.000413903	0.0223831	1.1e-05	0.004999	1.59259e-05	0.000667582
203	EIKNYIQGINLVQAK(3)-AEAEKIK(5)	2656.49	null	NP_002940 GeneID:6182 MRPL12(150)-NP_002940 GeneID:6182 MRPL12(183)/	Intra-Protein							NP_002940	GeneID:6182	MRPL12(150)	NP_002940	GeneID:6182	MRPL12(183)
	1	mice-tumour-7-F16-2-ex2_FS-65v.21205.21205.4.3.dta	4	2656.48	1	0.0487923	-0.008532	-3.21176	0.0030291	1
204	EIKNYIQGINLVQAK(3)-LTEAKPVDK(5)	2868.61	null	NP_002940 GeneID:6182 MRPL12(150)-NP_002940 GeneID:6182 MRPL12(138)/	Intra-Protein							NP_002940	GeneID:6182	MRPL12(150)	NP_002940	GeneID:6182	MRPL12(138)
	1	mice-tumour-7-F16-2-ex2_FS-65v.21708.21708.4.0.dta	4	2868.61	0.00363347	0.000570567	-0.001555	-0.542075	6.863e-09	0.00292095
	2	mice-tumour-7-F16-3-ex2_FS-65v.21626.21626.4.0.dta	4	2868.6	0.00111459	0.00180828	-0.004809	-1.67642	5.36923e-09	0.00247056
	3	mice-tumour-7-F16-1-ex2_FS-65v.21804.21804.4.0.dta	4	2868.6	0.00388391	0.0229103	-0.006658	-2.32099	1.3211e-07	0.00577768
	4	mice-tumour-7-F16-1-ex2_FS-65v.21770.21770.4.0.dta	4	2868.6	0.100577	0.101092	-0.006658	-2.32099	9.40218e-07	0.19629
	5	mice-tumour-7-F16-2-ex2_FS-65v.21682.21682.4.0.dta	4	2868.61	1	0.194162	-0.001463	-0.510003	0.285598	1
205	EIKNYIQGINLVQAK(3)-LTEAKPVDKVK(9)	3095.77	null	NP_002940 GeneID:6182 MRPL12(150)-NP_002940 GeneID:6182 MRPL12(142)/	Intra-Protein							NP_002940	GeneID:6182	MRPL12(150)	NP_002940	GeneID:6182	MRPL12(142)
	1	mice-tumour-7-F17-3-ex2_FS-45v.18203.18203.3.0.dta	3	3095.77	3.94775e-09	1.23851e-06	0.000697	0.225146	7.31387e-10	2.19021e-11
	2	mice-tumour-7-F17-1-ex2_FS-45v.18198.18198.3.0.dta	3	3095.77	2.29267e-07	2.06743e-05	-0.0028	-0.90446	5.9615e-05	2.76435e-09
	3	mice-tumour-7-F17-2-ex2_FS-45v.18315.18315.3.0.dta	3	3095.77	1.9856e-06	4.43479e-05	0.00095	0.30687	1.08786e-09	1.2773e-07
206	EIKNYIQGINLVQAK(3)-PVDKVK(4)	2553.46	null	NP_002940 GeneID:6182 MRPL12(150)-NP_002940 GeneID:6182 MRPL12(142)/	Intra-Protein							NP_002940	GeneID:6182	MRPL12(150)	NP_002940	GeneID:6182	MRPL12(142)
	1	mice-tumour-7-F14-2-ex2_FS-65V.21562.21562.4.4.dta	4	2553.46	0.0988871	0.0065379	-0.005733	-2.24519	8.18527e-10	0.161961
	2	mice-tumour-7-F14-3-ex2_FS-65V.21465.21465.4.1.dta	4	2553.46	0.0886046	0.0243246	-0.005343	-2.09245	6.67565e-10	0.149605
	3	mice-tumour-7-F14-2-ex2_FS-65V.21534.21534.4.3.dta	4	2553.46	0.0148758	0.0296901	-0.005844	-2.28865	1.03085e-08	0.0470365
	4	mice-tumour-7-F14-3-ex2_FS-65V.21482.21482.4.2.dta	4	2553.46	0.0521305	0.0462116	-0.005343	-2.09245	3.19305e-09	0.10922
	5	mice-tumour-7-F17-3-ex2_FS-65v.20556.20556.4.0.dta	4	2553.46	0.0574075	0.209875	-0.004061	-1.59039	8.42448e-07	0.138408
	6	mice-tumour-7-F14-1-ex2_FS-65V.21638.21638.4.0.dta	4	2553.46	0.0436121	0.301859	-0.006126	-2.39909	5.11148e-09	0.0653841
	7	mice-tumour-7-F17-1-ex2_FS-65v.20477.20477.4.1.dta	4	2553.46	0.104403	0.316111	-0.003195	-1.25124	1.15068e-05	0.163963
	8	mice-tumour-7-F14-1-ex2_FS-65V.21614.21614.4.0.dta	4	2553.46	0.0766833	0.491044	-0.006126	-2.39909	1.38814e-08	0.0708235
	9	mice-tumour-7-F17-3-ex2_FS-65v.20617.20617.4.1.dta	4	2553.46	0.186512	0.510804	-0.00497	-1.94637	0.000102164	0.193483
	10	mice-tumour-7-F17-1-ex2_FS-65v.20455.20455.4.2.dta	4	2553.46	0.17466	0.567774	-0.003195	-1.25124	0.000155597	0.262151
207	EIKYRGMFHALFR(3)-SGLNWK(1)	2525.31	Oxidation[M](7)	NP_001269127 GeneID:9016 SLC25A14(48)-NP_001269127 GeneID:9016 SLC25A14(2)/NP_001269125 GeneID:9016 SLC25A14(80)-NP_001269127 GeneID:9016 SLC25A14(2)/NP_001269124 GeneID:9016 SLC25A14(83)-NP_001269127 GeneID:9016 SLC25A14(2)/NP_001269126 GeneID:9016 SLC25A14(80)-NP_001269127 GeneID:9016 SLC25A14(2)/	Intra-Protein							NP_001269127	GeneID:9016	SLC25A14(48)	NP_001269127	GeneID:9016	SLC25A14(2)
	1	mice-tumour-7-F16-1-ex2_FS-45v.30571.30571.3.0.dta	3	2525.31	0.355617	0.593738	-0.002158	-0.854548	0.383415	0.330942
208	EILEKKLSL(6)-AAAVAGMLR(1)	2085.2	Oxidation[M](19)	NP_004555 GeneID:5188 GATB(554)-NP_660298 GeneID:124995 MRPL10(2)/	Inter-Protein							NP_004555	GeneID:5188	GATB(554)	NP_660298	GeneID:124995	MRPL10(2)
	1	mice-tumour-7-F11-1-ex2_FS-65v.16570.16570.4.0.dta	4	2085.2	0.56214	0.546548	-0.002463	-1.18118	1	0.000565589
209	EILEQGLFSKVTLIGR(10)-KLTFDEEAYK(1)	3183.72	null	NP_001091990 GeneID:10553 HTATIP2(80)-NP_001091990 GeneID:10553 HTATIP2(88)/NP_001091990 GeneID:10553 HTATIP2(80)-NP_001091991 GeneID:10553 HTATIP2(54)/NP_001091990 GeneID:10553 HTATIP2(80)-NP_006401 GeneID:10553 HTATIP2(54)/NP_001091990 GeneID:10553 HTATIP2(80)-NP_001091993 GeneID:10553 HTATIP2(54)/NP_001091990 GeneID:10553 HTATIP2(80)-NP_001091992 GeneID:10553 HTATIP2(54)/NP_001091991 GeneID:10…	Intra-Protein							NP_001091990	GeneID:10553	HTATIP2(80)	NP_001091990	GeneID:10553	HTATIP2(88)
	1	mice-tumour-7-F20-2-ex2_FS-65v.30540.30540.4.0.dta	4	3183.72	8.10411e-10	1.38506e-17	0.003277	1.0293	2.22934e-10	1.52957e-10
	2	mice-tumour-7-F20-3-ex2_FS-65v.30621.30621.4.0.dta	4	3183.72	1.86575e-07	8.20466e-06	0.004662	1.46433	2.79349e-07	5.16677e-09
	3	mice-tumour-7-F20-1-ex2_FS-65v.30616.30616.4.0.dta	4	3183.71	7.57487e-09	0.00845522	-0.010854	-3.40922	2.91269e-11	1.47393e-11
210	EIPAKIIFEDDR(5)-PGGDTIFGKIIR(9)	2856.55	null	NP_005331 GeneID:3094 HINT1(30)-NP_005331 GeneID:3094 HINT1(21)/	Intra-Protein							NP_005331	GeneID:3094	HINT1(30)	NP_005331	GeneID:3094	HINT1(21)
	1	mice-tumour-7-F19-2-ex2_FS-65v.30138.30138.4.1.dta	4	2856.54	0.00486611	0.00216351	-0.012753	-4.46448	5.37042e-17	0.023007
	2	mice-tumour-7-F19-3-ex2_FS-65v.30127.30127.4.0.dta	4	2856.54	1.55207e-06	0.00293049	-0.011539	-4.03949	1.5279e-13	3.78801e-07
	3	mice-tumour-7-F19-1-ex2_FS-65v.30122.30122.4.1.dta	4	2856.54	0.0373557	0.00604338	-0.009221	-3.22802	1.17572e-06	0.063558
	4	mice-tumour-7-F19-1-ex2_FS-65v.30071.30071.4.0.dta	4	2856.54	1	0.354366	-0.009221	-3.22802	1	1
211	EIVLKAQILAGGR(5)-GKGVFNSGLK(2)	2511.47	null	NP_001171070 GeneID:8801 SUCLG2(83)-NP_001171070 GeneID:8801 SUCLG2(93)/NP_001171070 GeneID:8801 SUCLG2(83)-NP_003839 GeneID:8801 SUCLG2(93)/NP_003839 GeneID:8801 SUCLG2(83)-NP_001171070 GeneID:8801 SUCLG2(93)/NP_003839 GeneID:8801 SUCLG2(83)-NP_003839 GeneID:8801 SUCLG2(93)/	Intra-Protein							NP_003839	GeneID:8801	SUCLG2(83)	NP_003839	GeneID:8801	SUCLG2(93)
	1	mice-tumour-7-F11-3-ex2_FS-65v.25854.25854.4.1.dta	4	2511.46	0.884991	0.0110243	-0.004321	-1.72051	0.0116252	0.595544
	2	mice-tumour-7-F11-2-ex2_FS-65v.25992.25992.4.0.dta	4	2511.46	0.0281442	0.0112444	-0.003475	-1.38365	2.45353e-05	0.00367535
212	EKASWSSLSMDEK(2)-FKESFAEMNR(2)	2893.34	null	NP_001852 GeneID:1327 COX4I1(67)-NP_001852 GeneID:1327 COX4I1(87)/	Intra-Protein							NP_001852	GeneID:1327	COX4I1(67)	NP_001852	GeneID:1327	COX4I1(87)
	1	mice-tumour-7-F19-1-ex2_FS-65v.19651.19651.4.0.dta	4	2893.34	5.97222e-08	2.32657e-07	-0.002409	-0.832602	4.15031e-10	7.47127e-07
	2	mice-tumour-7-F19-2-ex2_FS-65v.19567.19567.4.0.dta	4	2893.33	7.80994e-07	2.74422e-07	-0.009825	-3.39573	7.17964e-08	3.09717e-06
	3	mice-tumour-7-F19-3-ex2_FS-65v.19573.19573.4.0.dta	4	2893.33	1.85817e-06	6.81479e-07	-0.005218	-1.80345	9.35621e-07	5.34692e-08
	4	mice-tumour-7-F19-3-ex2_FS-65v.19579.19579.4.0.dta	4	2893.33	0.341117	0.0200467	-0.005218	-1.80345	1	0.00110348
213	EKASWSSLSMDEK(2)-HLSASQKALK(7)	2717.38	null	NP_001852 GeneID:1327 COX4I1(67)-NP_001852 GeneID:1327 COX4I1(60)/	Intra-Protein							NP_001852	GeneID:1327	COX4I1(67)	NP_001852	GeneID:1327	COX4I1(60)
	1	mice-tumour-7-F14-2-ex2_FS-45V.12354.12354.3.0.dta	3	2717.38	2.32853e-06	7.06983e-11	-0.002158	-0.794147	3.86457e-07	0.000102316
	2	mice-tumour-7-F14-1-ex2_FS-45V.12392.12392.3.0.dta	3	2717.38	1.88589e-06	2.14957e-09	-0.003821	-1.40613	1.1641e-08	9.09227e-05
	3	mice-tumour-7-F14-3-ex2_FS-45V.12350.12350.3.0.dta	3	2717.38	6.63819e-06	0.000262602	-0.002298	-0.845667	7.67983e-10	0.000164929
214	EKASWSSLSMDEK(2)-HLSASQKALKEK(7)	2974.52	null	NP_001852 GeneID:1327 COX4I1(67)-NP_001852 GeneID:1327 COX4I1(60)/	Intra-Protein							NP_001852	GeneID:1327	COX4I1(67)	NP_001852	GeneID:1327	COX4I1(60)
	1	mice-tumour-7-F17-1-ex2_FS-45v.10102.10102.3.0.dta	3	2974.51	0.727971	0.0595725	-0.005363	-1.80298	0.000871059	0.242061
215	EKDPKYSALR(5)-ATEMLIFGKK(9)	2481.34	null	NP_940938 GeneID:374882 TMEM205(149)-NP_996667 GeneID:10455 ECI2(304)/NP_940938 GeneID:374882 TMEM205(149)-NP_001159482 GeneID:10455 ECI2(274)/NP_940938 GeneID:374882 TMEM205(149)-NP_006108 GeneID:10455 ECI2(274)/NP_001138888 GeneID:374882 TMEM205(149)-NP_996667 GeneID:10455 ECI2(304)/NP_001138888 GeneID:374882 TMEM205(149)-NP_001159482 GeneID:10455 ECI2(274)/NP_001138888 GeneID:374882 TMEM205(14…	Inter-Protein							NP_940938	GeneID:374882	TMEM205(149)	NP_996667	GeneID:10455	ECI2(304)
	1	mice-tumour-7-F15-1-ex2_FS-65V.17551.17551.3.0.dta	3	2481.34	1	0.277386	-0.0005	-0.201504	1	1
216	EKEKASWSSLSMDEK(4)-HLSASQKALK(7)	2974.52	null	NP_001852 GeneID:1327 COX4I1(67)-NP_001852 GeneID:1327 COX4I1(60)/	Intra-Protein							NP_001852	GeneID:1327	COX4I1(67)	NP_001852	GeneID:1327	COX4I1(60)
	1	mice-tumour-7-F17-3-ex2_FS-45v.10075.10075.3.0.dta	3	2974.52	0.000373118	6.05046e-05	-0.003813	-1.28189	9.75258e-09	6.66347e-08
	2	mice-tumour-7-F17-1-ex2_FS-45v.10151.10151.3.0.dta	3	2974.52	0.0690297	0.00785717	-0.00333	-1.11951	8.28919e-07	2.51521e-06
	3	mice-tumour-7-F17-1-ex2_FS-65v.10787.10787.4.0.dta	4	2974.52	0.0014592	0.0127212	-0.003382	-1.13699	1.25551e-11	1.45243e-05
	4	mice-tumour-7-F17-2-ex2_FS-45v.10152.10152.3.0.dta	3	2974.52	0.0282392	0.0130067	0.00089	0.299208	1	0.0363308
	5	mice-tumour-7-F17-1-ex2_FS-65v.10775.10775.4.1.dta	4	2974.52	0.00369749	0.0516928	-0.003382	-1.13699	7.25352e-09	0.000203487
217	EKEKASWSSLSMDEK(4)-LHKMGLK(3)	2718.38	null	NP_001852 GeneID:1327 COX4I1(67)-NP_001599 GeneID:33 ACADL(250)/	Inter-Protein							NP_001852	GeneID:1327	COX4I1(67)	NP_001599	GeneID:33	ACADL(250)
	1	mice-tumour-7-F14-2-ex2_FS-45V.12354.12354.3.1.dta	3	2718.38	0.554183	0.278092	-0.001192	-0.438496	3.76364e-11	0.756966
	2	mice-tumour-7-F14-1-ex2_FS-45V.12392.12392.3.2.dta	3	2718.38	1	0.447093	-0.00019	-0.069894	4.56811e-09	1
218	EKFSQLAEAYEVLSDEVK(2)-YHPDTNKDDPK(7)	3551.71	null	NP_001128582 GeneID:9093 DNAJA3(134)-NP_001128582 GeneID:9093 DNAJA3(126)/NP_001128582 GeneID:9093 DNAJA3(134)-NP_005138 GeneID:9093 DNAJA3(126)/NP_005138 GeneID:9093 DNAJA3(134)-NP_001128582 GeneID:9093 DNAJA3(126)/NP_005138 GeneID:9093 DNAJA3(134)-NP_005138 GeneID:9093 DNAJA3(126)/	Intra-Protein							NP_001128582	GeneID:9093	DNAJA3(134)	NP_001128582	GeneID:9093	DNAJA3(126)
	1	mice-tumour-7-F1-2-ex2_FS-65V.29466.29466.4.5.dta	4	3551.7	0.474474	0.00201365	-0.002453	-0.690654	1	0.229361
	2	mice-tumour-7-F1-3-ex2_FS-65V.29565.29565.4.0.dta	4	3551.69	1	0.0024642	-0.01647	-4.63721	1	1
	3	mice-tumour-7-F1-1-ex2_FS-65v.29702.29702.4.2.dta	4	3551.69	0.0248322	0.206424	-0.015935	-4.48658	1	0.117998
219	EKSQEVLK(2)-LKELESR(2)	1972.1	null	NP_064716 GeneID:57038 RARS2(275)-NP_054887 GeneID:29081 METTL5(7)/	Inter-Protein							NP_064716	GeneID:57038	RARS2(275)	NP_054887	GeneID:29081	METTL5(7)
	1	mice-tumour-7-F14-1-ex2_FS-45V.12303.12303.4.0.dta	4	1972.1	0.287026	0.539346	0.000203	0.102936	0.575814	0.0185468
220	EKVPLER(2)-HGIKLYK(4)	1866.08	null	NP_653337 GeneID:55471 NDUFAF7(173)-NP_005006 GeneID:5018 OXA1L(272)/	Inter-Protein							NP_653337	GeneID:55471	NDUFAF7(173)	NP_005006	GeneID:5018	OXA1L(272)
	1	mice-tumour-7-F14-2-ex2_FS-45V.19439.19439.4.0.dta	4	1866.08	0.202342	0.237524	-0.000305	-0.163444	0.0101397	0.352354
221	ELAEDDSILK(10)-KQDELKR(6)	2186.15	null	NP_009031 GeneID:521 ATP5ME(69)-NP_009031 GeneID:521 ATP5ME(55)/	Intra-Protein							NP_009031	GeneID:521	ATP5ME(69)	NP_009031	GeneID:521	ATP5ME(55)
	1	mice-tumour-7-F20-2-ex2_FS-65v.13586.13586.3.0.dta	3	2186.15	1	0.29176	-0.003592	-1.64307	0.0286628	1
222	ELAEDDSILK(10)-QDELKR(5)	2058.06	null	NP_009031 GeneID:521 ATP5ME(69)-NP_009031 GeneID:521 ATP5ME(55)/	Intra-Protein							NP_009031	GeneID:521	ATP5ME(69)	NP_009031	GeneID:521	ATP5ME(55)
	1	mice-tumour-7-F1-1-ex2_FS-65v.19533.19533.3.0.dta	3	2058.05	0.0338187	0.3122	-0.008907	-4.32786	0.00870519	0.0447677
223	ELAEDDSILK(10)-YNYLKPR(5)	2223.15	null	NP_009031 GeneID:521 ATP5ME(69)-NP_009031 GeneID:521 ATP5ME(34)/	Intra-Protein							NP_009031	GeneID:521	ATP5ME(69)	NP_009031	GeneID:521	ATP5ME(34)
	1	mice-tumour-7-F19-1-ex2_FS-65v.21496.21496.3.1.dta	3	2223.14	0.0863676	0.203469	-0.009329	-4.19629	0.159409	1
	2	mice-tumour-7-F19-2-ex2_FS-65v.21453.21453.3.1.dta	3	2223.15	0.0656971	0.20993	-0.008115	-3.65022	0.033965	0.0334394
	3	mice-tumour-7-F19-3-ex2_FS-65v.21460.21460.3.1.dta	3	2223.14	0.188085	0.423774	-0.01353	-6.08595	0.138068	0.0103804
224	ELEYVLK(1)-IGAETKK(6)	1777	null	NP_001275901 GeneID:80221 ACSF2(2)-NP_004499 GeneID:3422 IDI1(93)/NP_001275900 GeneID:80221 ACSF2(2)-NP_004499 GeneID:3422 IDI1(93)/	Inter-Protein							NP_001275898	GeneID:80221	ACSF2(149)	NP_004499	GeneID:3422	IDI1(93)
	1	mice-tumour-7-F7-2-ex2_FS-65v.23096.23096.3.0.dta	3	1777	0.0183339	0.540276	0.002214	1.24592	0.124974	0.00033531
225	ELGHGALAEKALYPVIPR(10)-EIGTSDKEILTSR(7)	3519.91	null	NP_149100 GeneID:87178 PNPT1(456)-NP_149100 GeneID:87178 PNPT1(126)/	Intra-Protein							NP_149100	GeneID:87178	PNPT1(456)	NP_149100	GeneID:87178	PNPT1(126)
	1	mice-tumour-7-F18-1-ex2_FS-45v.23553.23553.5.3.dta	5	3519.89	0.111178	0.3099	-0.019063	-5.41577	0.0237891	0.0933247
	2	mice-tumour-7-F18-1-ex2_FS-45v.23598.23598.5.2.dta	5	3519.89	0.0284569	0.526422	-0.019063	-5.41577	0.0238	0.0214418
226	ELISNASDALEKLR(12)-KSVTDSIR(1)	2601.41	null	NP_057376 GeneID:10131 TRAP1(126)-NP_036192 GeneID:10059 DNM1L(256)/NP_057376 GeneID:10131 TRAP1(126)-NP_036193 GeneID:10059 DNM1L(256)/NP_057376 GeneID:10131 TRAP1(126)-NP_005681 GeneID:10059 DNM1L(256)/NP_057376 GeneID:10131 TRAP1(126)-NP_001265392 GeneID:10059 DNM1L(256)/NP_057376 GeneID:10131 TRAP1(126)-NP_001265395 GeneID:10059 DNM1L(53)/NP_057376 GeneID:10131 TRAP1(126)-NP_001265394 GeneID:…	Inter-Protein							NP_001258978	GeneID:10131	TRAP1(73)	NP_001265395	GeneID:10059	DNM1L(53)
	1	mice-tumour-7-F17-2-ex2_FS-65v.25226.25226.4.0.dta	4	2601.42	0.000273507	0.0696214	0.011534	4.43375	2.02487e-05	0.000108397
227	ELKEIQYGIR(3)-GKDQQVR(2)	2216.2	null	NP_001271254 GeneID:587 BCAT2(337)-NP_001271254 GeneID:587 BCAT2(71)/NP_001271254 GeneID:587 BCAT2(337)-NP_001181 GeneID:587 BCAT2(111)/NP_001271254 GeneID:587 BCAT2(337)-NP_001158245 GeneID:587 BCAT2(19)/NP_001181 GeneID:587 BCAT2(377)-NP_001271254 GeneID:587 BCAT2(71)/NP_001181 GeneID:587 BCAT2(377)-NP_001181 GeneID:587 BCAT2(111)/NP_001181 GeneID:587 BCAT2(377)-NP_001158245 GeneID:587 BCAT2(19…	Intra-Protein							NP_001271254	GeneID:587	BCAT2(337)	NP_001271254	GeneID:587	BCAT2(71)
	1	mice-tumour-7-F9-3-ex2_FS-65v.13215.13215.3.0.dta	3	2216.2	3.83693e-10	3.66886e-08	-0.00422	-1.90416	7.53332e-10	2.2265e-09
	2	mice-tumour-7-F9-2-ex2_FS-65V.13196.13196.3.0.dta	3	2216.2	4.11399e-06	6.42554e-08	-0.00387	-1.74623	0.000170026	1.79863e-08
	3	mice-tumour-7-F9-1-ex2_FS-65v.13184.13184.3.0.dta	3	2216.2	1.7484e-12	2.21111e-07	-0.003592	-1.62079	6.47849e-12	7.5439e-13
228	ELLYKFICTTSAIQNR(5)-SAKAISEQTGK(3)	3255.69	Carbamidomethyl[C](8);Acetyl[ProteinN-term](19)	NP_942127 GeneID:47 ACLY(17)-NP_942127 GeneID:47 ACLY(4)/NP_942127 GeneID:47 ACLY(17)-NP_001087 GeneID:47 ACLY(4)/NP_001087 GeneID:47 ACLY(17)-NP_942127 GeneID:47 ACLY(4)/NP_001087 GeneID:47 ACLY(17)-NP_001087 GeneID:47 ACLY(4)/	Intra-Protein							NP_942127	GeneID:47	ACLY(17)	NP_942127	GeneID:47	ACLY(4)
	1	mice-tumour-7-F16-3-ex2_FS-45v.26678.26678.4.3.dta	4	3255.71	0.000578936	9.53959e-05	0.018224	5.59758	7.76175e-08	0.00072443
	2	mice-tumour-7-F16-2-ex2_FS-45v.26642.26642.4.2.dta	4	3255.71	0.000167382	0.000265423	0.014425	4.4307	1.28213e-08	0.000133345
229	ELQPSEEVTWK(11)-NKSMLFK(2)	2350.2	null	NP_004536 GeneID:4707 NDUFB1(105)-NP_004536 GeneID:4707 NDUFB1(88)/	Intra-Protein							NP_004536	GeneID:4707	NDUFB1(105)	NP_004536	GeneID:4707	NDUFB1(88)
	1	mice-tumour-7-F18-1-ex2_FS-65v.24619.24619.3.1.dta	3	2350.19	7.24527e-10	3.48126e-07	-0.011019	-4.68854	2.9985e-10	7.89641e-10
	2	mice-tumour-7-F18-2-ex2_FS-65v.24498.24498.3.0.dta	3	2350.19	7.9577e-08	3.39943e-06	-0.014091	-5.99566	6.92916e-10	6.06129e-08
	3	mice-tumour-7-F18-3-ex2_FS-65v.24506.24506.3.0.dta	3	2350.19	3.67715e-13	7.32367e-05	-0.007654	-3.25674	1.28751e-12	3.8353e-13
230	ELQSMADQEKISPAALK(10)-KTLLDR(1)	2741.48	null	NP_037460 GeneID:29920 PYCR2(276)-NP_037460 GeneID:29920 PYCR2(284)/NP_037460 GeneID:29920 PYCR2(276)-NP_001258610 GeneID:29920 PYCR2(210)/NP_001258610 GeneID:29920 PYCR2(202)-NP_037460 GeneID:29920 PYCR2(284)/NP_001258610 GeneID:29920 PYCR2(202)-NP_001258610 GeneID:29920 PYCR2(210)/	Intra-Protein							NP_037460	GeneID:29920	PYCR2(276)	NP_037460	GeneID:29920	PYCR2(284)
	1	mice-tumour-7-F16-2-ex2_FS-65v.20136.20136.4.1.dta	4	2741.47	2.4465e-08	0.000178549	-0.002593	-0.945841	7.17783e-05	2.59695e-07
	2	mice-tumour-7-F16-3-ex2_FS-65v.20034.20034.4.0.dta	4	2741.47	3.96837e-06	0.000399583	-0.009483	-3.45909	2.8656e-05	2.90468e-06
	3	mice-tumour-7-F16-3-ex2_FS-45v.17699.17699.3.0.dta	3	2741.47	3.40028e-06	0.000502828	-0.0046	-1.67793	0.00104053	4.97452e-05
	4	mice-tumour-7-F16-2-ex2_FS-45v.17631.17631.3.0.dta	3	2741.47	4.30692e-07	0.0223124	-0.004178	-1.524	1	1.89546e-08
	5	mice-tumour-7-F16-1-ex2_FS-65v.20196.20196.4.0.dta	4	2741.47	0.000458563	0.152964	-0.010136	-3.69728	1.13463e-05	0.000231415
231	ELQVKQQLDSCVTK(5)-AKDSIDAGSK(2)	2804.43	Carbamidomethyl[C](11)	NP_116211 GeneID:84908 FAM136A(104)-NP_116211 GeneID:84908 FAM136A(91)/	Intra-Protein							NP_116211	GeneID:84908	FAM136A(104)	NP_116211	GeneID:84908	FAM136A(91)
	1	mice-tumour-7-F16-3-ex2_FS-65v.15472.15472.4.0.dta	4	2804.43	4.42394e-12	8.59432e-06	-0.00328	-1.16958	9.59198e-14	4.68696e-07
	2	mice-tumour-7-F16-2-ex2_FS-45v.13325.13325.3.0.dta	3	2804.43	3.43969e-05	8.45934e-05	-0.001827	-0.651468	1.47222e-05	0.00016582
	3	mice-tumour-7-F16-2-ex2_FS-65v.15577.15577.4.0.dta	4	2804.43	0.00085906	9.6671e-05	-0.002469	-0.880391	1.81286e-05	3.49589e-05
	4	mice-tumour-7-F16-1-ex2_FS-65v.15533.15533.4.0.dta	4	2804.43	6.87904e-05	0.000251177	-0.003329	-1.18705	0.0128474	6.75647e-06
	5	mice-tumour-7-F16-1-ex2_FS-65v.15517.15517.4.0.dta	4	2804.43	1.8646e-05	0.000284595	-0.00551	-1.96474	0.000726601	5.72509e-07
	6	mice-tumour-7-F16-1-ex2_FS-45v.13316.13316.3.0.dta	3	2804.43	0.000546932	0.000809382	-0.00537	-1.91482	7.9972e-10	8.0322e-05
232	ELSGLGSALKNPFGNAGLLLGEAGK(10)-KGIVNEQFLLQR(1)	3995.2	null	NP_001257377 GeneID:37 ACADVL(416)-NP_001257377 GeneID:37 ACADVL(480)/NP_001257377 GeneID:37 ACADVL(416)-NP_000009 GeneID:37 ACADVL(556)/NP_001257377 GeneID:37 ACADVL(416)-NP_001257376 GeneID:37 ACADVL(579)/NP_001257377 GeneID:37 ACADVL(416)-NP_001029031 GeneID:37 ACADVL(534)/NP_000009 GeneID:37 ACADVL(492)-NP_001257377 GeneID:37 ACADVL(480)/NP_000009 GeneID:37 ACADVL(492)-NP_000009 GeneID:37 ACA…	Intra-Protein							NP_001257376	GeneID:37	ACADVL(515)	NP_001257376	GeneID:37	ACADVL(579)
	1	mice-tumour-7-F18-1-ex2_FS-45v.30473.30473.4.1.dta	4	3995.19	0.0955043	0.46355	-0.002406	-0.602223	0.42787	0.0113154
233	ELVKQFLFDSILK(4)-HQILPKEQWTK(6)	3124.74	null	NP_078959 GeneID:79736 TEFM(301)-NP_001186904 GeneID:7381 UQCRB(46)/NP_078959 GeneID:79736 TEFM(301)-NP_006285 GeneID:7381 UQCRB(78)/NP_078959 GeneID:79736 TEFM(301)-NP_001241681 GeneID:7381 UQCRB(78)/	Inter-Protein							NP_078959	GeneID:79736	TEFM(301)	NP_006285	GeneID:7381	UQCRB(78)
	1	mice-tumour-7-F3-2-ex2_FS-65v.15848.15848.6.3.dta	6	3124.73	0.975537	0.371081	-0.018722	-5.99153	1	1.79305e-05
234	ELWFSDDPNVTKTLR(12)-FKQWNGK(2)	2865.46	null	NP_665811 GeneID:9131 AIFM1(185)-NP_665811 GeneID:9131 AIFM1(190)/NP_665811 GeneID:9131 AIFM1(185)-NP_004199 GeneID:9131 AIFM1(194)/NP_665811 GeneID:9131 AIFM1(185)-NP_001124319 GeneID:9131 AIFM1(194)/NP_004199 GeneID:9131 AIFM1(189)-NP_665811 GeneID:9131 AIFM1(190)/NP_004199 GeneID:9131 AIFM1(189)-NP_004199 GeneID:9131 AIFM1(194)/NP_004199 GeneID:9131 AIFM1(189)-NP_001124319 GeneID:9131 AIFM1(19…	Intra-Protein							NP_004199	GeneID:9131	AIFM1(189)	NP_004199	GeneID:9131	AIFM1(194)
	1	mice-tumour-7-F16-2-ex2_FS-65v.24707.24707.4.0.dta	4	2865.45	1.68065e-16	1.66481e-06	-0.002488	-0.868273	7.2072e-07	1.43355e-14
	2	mice-tumour-7-F16-3-ex2_FS-65v.24594.24594.4.0.dta	4	2865.46	3.53434e-16	0.00536542	-0.000532	-0.18566	1.98648e-08	3.92605e-14
	3	mice-tumour-7-F16-1-ex2_FS-65v.24762.24762.4.0.dta	4	2865.45	1.9725e-15	0.020579	-0.0031	-1.08185	9.50915e-08	1.1327e-14
	4	mice-tumour-7-F16-1-ex2_FS-45v.22306.22306.3.0.dta	3	2865.46	1.40448e-08	0.160094	0.0006	0.209391	0.0272303	1.57198e-08
235	ELWFSDDPNVTKTLR(12)-SLEKISR(4)	2790.47	null	NP_665811 GeneID:9131 AIFM1(185)-NP_665811 GeneID:9131 AIFM1(291)/NP_665811 GeneID:9131 AIFM1(185)-NP_004199 GeneID:9131 AIFM1(295)/NP_665811 GeneID:9131 AIFM1(185)-NP_001124319 GeneID:9131 AIFM1(295)/NP_004199 GeneID:9131 AIFM1(189)-NP_665811 GeneID:9131 AIFM1(291)/NP_004199 GeneID:9131 AIFM1(189)-NP_004199 GeneID:9131 AIFM1(295)/NP_004199 GeneID:9131 AIFM1(189)-NP_001124319 GeneID:9131 AIFM1(29…	Intra-Protein							NP_004199	GeneID:9131	AIFM1(189)	NP_004199	GeneID:9131	AIFM1(295)
	1	mice-tumour-7-F16-2-ex2_FS-65v.24260.24260.4.0.dta	4	2790.47	1.32418e-05	0.0301408	-0.000903	-0.323602	3.86362e-13	1.57033e-07
	2	mice-tumour-7-F16-1-ex2_FS-65v.24332.24332.4.0.dta	4	2790.46	9.68689e-08	0.0910278	-0.008504	-3.04752	2.75684e-16	2.03191e-08
236	ELYIQHAKEDETR(8)-TVKENWK(3)	2673.35	null	NP_003192 GeneID:7019 TFAM(205)-NP_003192 GeneID:7019 TFAM(186)/NP_003192 GeneID:7019 TFAM(205)-NP_001257711 GeneID:7019 TFAM(154)/NP_001257711 GeneID:7019 TFAM(173)-NP_003192 GeneID:7019 TFAM(186)/NP_001257711 GeneID:7019 TFAM(173)-NP_001257711 GeneID:7019 TFAM(154)/	Intra-Protein							NP_003192	GeneID:7019	TFAM(205)	NP_003192	GeneID:7019	TFAM(186)
	1	mice-tumour-7-F19-3-ex2_FS-45v.11532.11532.4.0.dta	4	2673.35	0.0063205	0.0475448	-0.004143	-1.54974	0.113525	1.52459e-05
237	EMVECFNKISR(8)-NAMNKVFWR(5)	2715.32	Carbamidomethyl[C](5)	NP_001389 GeneID:1891 ECH1(95)-NP_001389 GeneID:1891 ECH1(83)/	Intra-Protein							NP_001389	GeneID:1891	ECH1(95)	NP_001389	GeneID:1891	ECH1(83)
	1	mice-tumour-7-F10-2-ex2_FS-65v.24763.24763.4.0.dta	4	2715.32	5.67134e-07	0.000368489	-0.004002	-1.47386	6.37188e-06	3.76019e-07
	2	mice-tumour-7-F10-3-ex2_FS-65v.24734.24734.4.0.dta	4	2715.31	0.000320919	0.00245787	-0.005764	-2.12277	0.000120234	0.000107962
	3	mice-tumour-7-F10-1-ex2_FS-65v.24998.24998.4.0.dta	4	2715.32	2.70162e-05	0.0143577	-0.004812	-1.77217	0.00519659	0.000136644
	4	mice-tumour-7-F10-1-ex2_FS-65v.25015.25015.4.1.dta	4	2715.32	0.0488662	0.0710309	-0.004812	-1.77217	0.112559	7.23888e-05
238	ENGPVVETVQVPLSKR(15)-AKFVGPGGYNLK(2)	3139.71	null	NP_149100 GeneID:87178 PNPT1(616)-NP_149100 GeneID:87178 PNPT1(619)/	Intra-Protein							NP_149100	GeneID:87178	PNPT1(616)	NP_149100	GeneID:87178	PNPT1(619)
	1	mice-tumour-7-F11-3-ex2_FS-65v.23425.23425.4.1.dta	4	3139.72	1	0.00106884	0.000764	0.243334	1	1
	2	mice-tumour-7-F11-1-ex2_FS-65v.23675.23675.4.2.dta	4	3139.73	1	0.0301204	0.013177	4.19688	1	1
	3	mice-tumour-7-F11-1-ex2_FS-65v.23694.23694.4.1.dta	4	3139.73	1	0.0548086	0.013177	4.19688	1	1
239	ENIRKMQGLMFR(5)-KLAYRPPK(1)	2632.46	null	NP_116211 GeneID:84908 FAM136A(27)-NP_001907 GeneID:1537 CYC1(318)/	Inter-Protein							NP_116211	GeneID:84908	FAM136A(27)	NP_001907	GeneID:1537	CYC1(318)
	1	mice-tumour-7-F3-2-ex2_FS-45V.16561.16561.6.3.dta	6	2632.46	1	0.50542	-0.000232	-0.088131	1	0.0257674
240	ENLKEIAK(4)-AAPSMKER(6)	1987.05	Oxidation[M](16)	NP_005580 GeneID:4329 ALDH6A1(117)-NP_001193570 GeneID:388753 COA6(7)/	Inter-Protein							NP_005580	GeneID:4329	ALDH6A1(117)	NP_001193570	GeneID:388753	COA6(7)
	1	mice-tumour-7-F9-3-ex2_FS-65v.26460.26460.3.1.dta	3	1987.05	1	0.230261	-0.000867	-0.436325	1	1
241	EPKVAASVLNPYVK(3)-SLNDITAKER(8)	2798.53	null	NP_001688 GeneID:539 ATP5PO(73)-NP_001688 GeneID:539 ATP5PO(98)/	Intra-Protein							NP_001688	GeneID:539	ATP5PO(73)	NP_001688	GeneID:539	ATP5PO(98)
	1	mice-tumour-7-F14-1-ex2_FS-45V.20373.20373.4.0.dta	4	2798.53	0.000150234	2.46998e-06	-0.00403	-1.44004	2.56392e-06	2.39803e-05
	2	mice-tumour-7-F14-1-ex2_FS-45V.20445.20445.3.0.dta	3	2798.53	1	7.84367e-05	-0.002784	-0.994808	1	0.0353516
	3	mice-tumour-7-F14-3-ex2_FS-45V.20262.20262.3.0.dta	3	2798.53	1.85781e-06	0.000928241	-0.001602	-0.572443	8.14752e-06	1.68617e-08
	4	mice-tumour-7-F14-2-ex2_FS-45V.20258.20258.4.2.dta	4	2798.52	0.00334746	0.00172992	-0.009124	-3.26028	1.91192e-08	0.00147283
	5	mice-tumour-7-F14-2-ex2_FS-45V.20331.20331.3.0.dta	3	2798.53	0.102617	0.00267467	-0.003896	-1.39216	0.0639525	0.00961996
	6	mice-tumour-7-F14-1-ex2_FS-45V.20350.20350.4.2.dta	4	2798.51	0.0718146	0.0109644	-0.019926	-7.12017	1.61032e-05	0.15463
	7	mice-tumour-7-F14-3-ex2_FS-45V.20265.20265.4.0.dta	4	2798.52	0.00305785	0.107236	-0.006825	-2.43878	9.14392e-08	0.00188525
	8	mice-tumour-7-F14-2-ex2_FS-45V.20225.20225.3.1.dta	3	2798.53	1	0.303295	-0.003896	-1.39216	0.321852	1
242	EPMQTGIKAVDSLVPIGR(8)-EGDIVKR(6)	2864.55	null	NP_004037 GeneID:498 ATP5F1A(194)-NP_004037 GeneID:498 ATP5F1A(132)/NP_004037 GeneID:498 ATP5F1A(194)-NP_001001935 GeneID:498 ATP5F1A(82)/NP_004037 GeneID:498 ATP5F1A(194)-NP_001244264 GeneID:498 ATP5F1A(82)/NP_004037 GeneID:498 ATP5F1A(194)-NP_001244263 GeneID:498 ATP5F1A(132)/NP_004037 GeneID:498 ATP5F1A(194)-NP_001001937 GeneID:498 ATP5F1A(132)/NP_001001935 GeneID:498 ATP5F1A(144)-NP_004037 Ge…	Intra-Protein							NP_001244264	GeneID:498	ATP5F1A(144)	NP_001244264	GeneID:498	ATP5F1A(82)
	1	mice-tumour-7-F16-2-ex2_FS-65v.26093.26093.4.0.dta	4	2864.55	0.000914457	0.00512075	-0.002085	-0.727862	0.00471809	0.0348163
243	EPMQTGIKAVDSLVPIGR(8)-GPIGSKTR(6)	2863.57	null	NP_004037 GeneID:498 ATP5F1A(194)-NP_004037 GeneID:498 ATP5F1A(167)/NP_004037 GeneID:498 ATP5F1A(194)-NP_001001935 GeneID:498 ATP5F1A(117)/NP_004037 GeneID:498 ATP5F1A(194)-NP_001244264 GeneID:498 ATP5F1A(117)/NP_004037 GeneID:498 ATP5F1A(194)-NP_001001937 GeneID:498 ATP5F1A(167)/NP_001001935 GeneID:498 ATP5F1A(144)-NP_004037 GeneID:498 ATP5F1A(167)/NP_001001935 GeneID:498 ATP5F1A(144)-NP_0010019…	Intra-Protein							NP_001244264	GeneID:498	ATP5F1A(144)	NP_001244264	GeneID:498	ATP5F1A(117)
	1	mice-tumour-7-F9-1-ex2_FS-65v.26779.26779.4.0.dta	4	2863.57	0.0128133	0.000266271	-0.005356	-1.87039	1.79386e-06	0.00206546
	2	mice-tumour-7-F10-2-ex2_FS-65v.26123.26123.4.0.dta	4	2863.57	0.00193329	0.011426	-0.005709	-1.99367	5.40959e-06	0.0585847
244	EPMQTGIKAVDSLVPIGR(8)-QTGKTSIAIDTIINQK(4)	3779.06	null	NP_004037 GeneID:498 ATP5F1A(194)-NP_004037 GeneID:498 ATP5F1A(218)/NP_004037 GeneID:498 ATP5F1A(194)-NP_001001935 GeneID:498 ATP5F1A(168)/NP_004037 GeneID:498 ATP5F1A(194)-NP_001244264 GeneID:498 ATP5F1A(168)/NP_004037 GeneID:498 ATP5F1A(194)-NP_001244263 GeneID:498 ATP5F1A(196)/NP_004037 GeneID:498 ATP5F1A(194)-NP_001001937 GeneID:498 ATP5F1A(218)/NP_001001935 GeneID:498 ATP5F1A(144)-NP_004037 …	Intra-Protein							NP_001244264	GeneID:498	ATP5F1A(144)	NP_001244264	GeneID:498	ATP5F1A(168)
	1	mice-tumour-7-F17-3-ex2_FS-45v.29329.29329.4.1.dta	4	3779.06	5.91568e-08	5.99667e-06	-0.000401	-0.106111	3.49272e-10	5.16853e-07
	2	mice-tumour-7-F16-3-ex2_FS-45v.28399.28399.4.0.dta	4	3779.05	2.99428e-05	7.81025e-05	-0.007805	-2.06533	1.37347e-06	0.000145896
	3	mice-tumour-7-F17-2-ex2_FS-45v.29396.29396.4.0.dta	4	3779.05	9.75951e-06	0.00860167	-0.012068	-3.19339	3.58891e-06	0.000101043
	4	mice-tumour-7-F16-1-ex2_FS-45v.28223.28223.4.0.dta	4	3779.06	2.12019e-06	0.00903064	-0.002285	-0.604647	5.44848e-11	4.08781e-05
	5	mice-tumour-7-F17-1-ex2_FS-45v.29212.29212.4.0.dta	4	3779.05	0.000851764	0.00980325	-0.007523	-1.99071	0.00033687	0.00302778
	6	mice-tumour-7-F16-2-ex2_FS-45v.28281.28281.4.0.dta	4	3779.05	0.00019938	0.0135087	-0.010363	-2.74221	3.63838e-05	0.00110779
245	EPMQTGIKAVDSLVPIGR(8)-VGLKAPGIIPR(4)	3168.82	null	NP_004037 GeneID:498 ATP5F1A(194)-NP_004037 GeneID:498 ATP5F1A(175)/NP_004037 GeneID:498 ATP5F1A(194)-NP_001001935 GeneID:498 ATP5F1A(125)/NP_004037 GeneID:498 ATP5F1A(194)-NP_001244264 GeneID:498 ATP5F1A(125)/NP_004037 GeneID:498 ATP5F1A(194)-NP_001244263 GeneID:498 ATP5F1A(153)/NP_004037 GeneID:498 ATP5F1A(194)-NP_001001937 GeneID:498 ATP5F1A(175)/NP_001001935 GeneID:498 ATP5F1A(144)-NP_004037 …	Intra-Protein							NP_001244264	GeneID:498	ATP5F1A(144)	NP_001244264	GeneID:498	ATP5F1A(125)
	1	mice-tumour-7-F13-1-ex2_FS-45V.29069.29069.4.0.dta	4	3168.81	3.57311e-22	0.0253814	-0.006067	-1.91459	0.00020222	1.22856e-13
	2	mice-tumour-7-F13-3-ex2_FS-45V.29133.29133.4.0.dta	4	3168.82	2.22435e-17	0.0538535	-0.001571	-0.495769	1.54207e-07	2.65329e-23
	3	mice-tumour-7-F13-2-ex2_FS-45V.29024.29024.4.0.dta	4	3168.81	5.01442e-07	0.126128	-0.009114	-2.87615	4.91177e-06	6.97704e-10
246	EQEKEK(4)-KAFLKR(1)	1689.95	null	NP_001166115 GeneID:7084 TK2(47)-NP_073591 GeneID:94081 SFXN1(254)/NP_001258864 GeneID:7084 TK2(16)-NP_073591 GeneID:94081 SFXN1(254)/NP_001166116 GeneID:7084 TK2(47)-NP_073591 GeneID:94081 SFXN1(254)/NP_001166114 GeneID:7084 TK2(16)-NP_073591 GeneID:94081 SFXN1(254)/NP_004605 GeneID:7084 TK2(47)-NP_073591 GeneID:94081 SFXN1(254)/	Inter-Protein							NP_001258864	GeneID:7084	TK2(16)	NP_073591	GeneID:94081	SFXN1(254)
	1	mice-tumour-7-F8-2-ex2_FS65V.18481.18481.3.0.dta	3	1689.95	0.0364119	0.11257	-0.00122	-0.721913	0.0589677	0.00102078
247	EQGLKGTYQGLTATVLK(5)-VKFIHDQTSPNPK(2)	3454.86	null	NP_001243463 GeneID:6576 SLC25A1(185)-NP_001243463 GeneID:6576 SLC25A1(156)/NP_001243463 GeneID:6576 SLC25A1(185)-NP_005975 GeneID:6576 SLC25A1(149)/NP_001243463 GeneID:6576 SLC25A1(185)-NP_001274316 GeneID:6576 SLC25A1(46)/NP_005975 GeneID:6576 SLC25A1(178)-NP_001243463 GeneID:6576 SLC25A1(156)/NP_005975 GeneID:6576 SLC25A1(178)-NP_005975 GeneID:6576 SLC25A1(149)/NP_005975 GeneID:6576 SLC25A1(17…	Intra-Protein							NP_001243463	GeneID:6576	SLC25A1(185)	NP_001243463	GeneID:6576	SLC25A1(156)
	1	mice-tumour-7-F14-1-ex2_FS-45V.19743.19743.4.0.dta	4	3454.86	1	4.43435e-05	0.000197	0.057021	1	1
248	ESNGPVKVWGSIK(7)-ATKAVCVLK(3)	2569.41	Carbamidomethyl[C](22);Acetyl[ProteinN-term](16)	NP_000445 GeneID:6647 SOD1(31)-NP_000445 GeneID:6647 SOD1(4)/	Intra-Protein							NP_000445	GeneID:6647	SOD1(31)	NP_000445	GeneID:6647	SOD1(4)
	1	mice-tumour-7-F10-2-ex2_FS-45v.24045.24045.3.1.dta	3	2569.41	0.00016122	0.119953	-0.000682	-0.265431	0.695414	0.00239077
	2	mice-tumour-7-F10-3-ex2_FS-45v.24138.24138.3.0.dta	3	2569.4	7.73539e-05	0.219644	-0.008802	-3.4257	0.269248	6.6803e-06
	3	mice-tumour-7-F10-1-ex2_FS-45v.24135.24135.3.0.dta	3	2569.41	0.277065	0.281747	0.003033	1.18043	0.233147	0.179608
249	ETGVDLTKDNMALQR(8)-HIVKEFK(4)	2728.43	null	NP_004125 GeneID:3313 HSPA9(300)-NP_004125 GeneID:3313 HSPA9(288)/	Intra-Protein							NP_004125	GeneID:3313	HSPA9(300)	NP_004125	GeneID:3313	HSPA9(288)
	1	mice-tumour-7-F17-3-ex2_FS-45v.15055.15055.3.0.dta	3	2728.43	1.37693e-07	1.48455e-05	-0.006861	-2.51463	6.18238e-17	1.40497e-07
	2	mice-tumour-7-F17-1-ex2_FS-45v.15049.15049.3.0.dta	3	2728.43	2.57602e-07	0.000100357	-0.00588	-2.15508	8.23726e-10	4.18621e-07
	3	mice-tumour-7-F17-1-ex2_FS-45v.15075.15075.3.0.dta	3	2728.43	1.05919e-05	0.000101773	-0.00588	-2.15508	3.17575e-09	7.48841e-07
	4	mice-tumour-7-F17-2-ex2_FS-45v.15185.15185.3.0.dta	3	2728.43	9.84183e-06	0.000184035	-0.005394	-1.97696	1.31526e-08	5.31284e-07
	5	mice-tumour-7-F17-1-ex2_FS-65v.15965.15965.5.0.dta	5	2728.42	0.000156691	0.0608028	-0.010003	-3.66621	2.80189e-09	1.22314e-05
250	ETIAKCIADLK(5)-KAQAQPVM(1)	2271.21	Carbamidomethyl[C](6)	NP_001679 GeneID:515 ATP5PB(238)-NP_001679 GeneID:515 ATP5PB(249)/	Intra-Protein							NP_001679	GeneID:515	ATP5PB(238)	NP_001679	GeneID:515	ATP5PB(249)
	1	mice-tumour-7-F11-1-ex2_FS-65v.20571.20571.3.0.dta	3	2271.2	0.000633185	0.000680379	-0.00495	-2.17946	3.94952e-10	8.01231e-05
	2	mice-tumour-7-F11-2-ex2_FS-65v.20514.20514.3.0.dta	3	2271.21	0.00118516	0.00285328	-0.000982	-0.432369	8.63842e-09	0.000626267
	3	mice-tumour-7-F11-3-ex2_FS-65v.20323.20323.3.0.dta	3	2271.21	0.000573124	0.0134945	-0.002408	-1.06023	5.21675e-10	0.000861212
251	ETLMDLSTKAFAMTNQILVEK(9)-KELSEPSSTR(1)	3653.87	null	NP_001116105 GeneID:1373 CPS1(618)-NP_001116105 GeneID:1373 CPS1(847)/NP_001116105 GeneID:1373 CPS1(618)-NP_001866 GeneID:1373 CPS1(841)/NP_001116105 GeneID:1373 CPS1(618)-NP_001116106 GeneID:1373 CPS1(390)/NP_001866 GeneID:1373 CPS1(612)-NP_001116105 GeneID:1373 CPS1(847)/NP_001866 GeneID:1373 CPS1(612)-NP_001866 GeneID:1373 CPS1(841)/NP_001866 GeneID:1373 CPS1(612)-NP_001116106 GeneID:1373 CPS1…	Intra-Protein							NP_001866	GeneID:1373	CPS1(612)	NP_001866	GeneID:1373	CPS1(841)
	1	mice-tumour-7-F20-3-ex2_FS-65v.32200.32200.4.0.dta	4	3653.83	1	0.0446382	-0.033458	-9.15688	1	1
252	EVAAQVKAPLVLKD(7)-APLVLKD(6)	2373.4	null	NP_009193 GeneID:11315 PARK7(182)-NP_009193 GeneID:11315 PARK7(188)/NP_009193 GeneID:11315 PARK7(182)-NP_001116849 GeneID:11315 PARK7(188)/NP_001116849 GeneID:11315 PARK7(182)-NP_009193 GeneID:11315 PARK7(188)/NP_001116849 GeneID:11315 PARK7(182)-NP_001116849 GeneID:11315 PARK7(188)/	Intra-Protein							NP_009193	GeneID:11315	PARK7(182)	NP_009193	GeneID:11315	PARK7(188)
	1	mice-tumour-7-F16-3-ex2_FS-65v.26976.26976.3.2.dta	3	2373.4	1	0.622892	-0.003913	-1.64869	1	0.599912
253	EVAEVKS(6)-YDLKTK(4)	1665.89	null	NP_036450 GeneID:3954 LETM1(738)-NP_619520 GeneID:22907 DHX30(760)/NP_036450 GeneID:3954 LETM1(738)-NP_055781 GeneID:22907 DHX30(721)/	Inter-Protein							NP_036450	GeneID:3954	LETM1(738)	NP_619520	GeneID:22907	DHX30(760)
	1	mice-tumour-7-F18-3-ex2_FS-45v.26633.26633.2.1.dta	2	1665.89	0.0213662	0.0191359	0.000212	0.127259	2.04052e-06	0.0438722
254	EVEMDAVGKDGR(9)-VKDATR(2)	2132.07	null	NP_001116105 GeneID:1373 CPS1(1189)-NP_001116105 GeneID:1373 CPS1(1230)/NP_001116105 GeneID:1373 CPS1(1189)-NP_001866 GeneID:1373 CPS1(1224)/NP_001116105 GeneID:1373 CPS1(1189)-NP_001116106 GeneID:1373 CPS1(773)/NP_001866 GeneID:1373 CPS1(1183)-NP_001116105 GeneID:1373 CPS1(1230)/NP_001866 GeneID:1373 CPS1(1183)-NP_001866 GeneID:1373 CPS1(1224)/NP_001866 GeneID:1373 CPS1(1183)-NP_001116106 GeneID…	Intra-Protein							NP_001866	GeneID:1373	CPS1(1183)	NP_001866	GeneID:1373	CPS1(1224)
	1	mice-tumour-7-F17-1-ex2_FS-65v.6942.6942.3.0.dta	3	2132.06	0.000208505	0.591911	-0.005678	-2.66315	0.000624523	0.00107303
255	EVENVAITALEGLKGDLAGR(14)-YYKLSEMTEQDQQR(3)	4011	null	NP_001093206 GeneID:1160 CKMT2(200)-NP_001093206 GeneID:1160 CKMT2(209)/NP_001093206 GeneID:1160 CKMT2(200)-NP_001093205 GeneID:1160 CKMT2(209)/NP_001093206 GeneID:1160 CKMT2(200)-NP_001816 GeneID:1160 CKMT2(209)/NP_001093205 GeneID:1160 CKMT2(200)-NP_001093206 GeneID:1160 CKMT2(209)/NP_001093205 GeneID:1160 CKMT2(200)-NP_001093205 GeneID:1160 CKMT2(209)/NP_001093205 GeneID:1160 CKMT2(200)-NP_001…	Intra-Protein							NP_001093206	GeneID:1160	CKMT2(200)	NP_001093206	GeneID:1160	CKMT2(209)
	1	mice-tumour-7-F1-3-ex2_FS-45V.30780.30780.4.1.dta	4	4010.98	3.39026e-07	0.0183229	-0.016785	-4.18474	5.37024e-09	4.93221e-09
	2	mice-tumour-7-F1-2-ex2_FS-45V.30843.30843.4.0.dta	4	4010.98	2.1091e-08	0.040254	-0.019205	-4.78808	1.29137e-06	3.99268e-08
	3	mice-tumour-7-F1-1-ex2_FS-45.30815.30815.4.1.dta	4	4010.99	2.88425e-07	0.150604	-0.014992	-3.73772	7.95145e-06	9.00593e-07
256	EVEQFTQVAKAYQDR(10)-LKACQQR(2)	2852.44	Carbamidomethyl[C](22)	NP_004539 GeneID:4716 NDUFB10(131)-NP_004539 GeneID:4716 NDUFB10(105)/	Intra-Protein							NP_004539	GeneID:4716	NDUFB10(131)	NP_004539	GeneID:4716	NDUFB10(105)
	1	mice-tumour-7-F10-3-ex2_FS-65v.14544.14544.4.0.dta	4	2852.43	2.85228e-12	7.5882e-07	-0.004462	-1.56428	2.21625e-07	9.42239e-10
	2	mice-tumour-7-F10-2-ex2_FS-65v.14572.14572.4.0.dta	4	2852.43	1.11572e-09	0.000682804	-0.005323	-1.86612	9.13429e-07	7.91019e-10
	3	mice-tumour-7-F10-1-ex2_FS-65v.14789.14789.4.0.dta	4	2852.43	2.14717e-11	0.00481156	-0.004804	-1.68417	3.88847e-05	7.73155e-09
257	EVITKAGMK(5)-NKDAVR(2)	1816	null	NP_002444 GeneID:4528 MTIF2(144)-NP_002444 GeneID:4528 MTIF2(163)/NP_002444 GeneID:4528 MTIF2(144)-NP_001005369 GeneID:4528 MTIF2(163)/NP_001005369 GeneID:4528 MTIF2(144)-NP_002444 GeneID:4528 MTIF2(163)/NP_001005369 GeneID:4528 MTIF2(144)-NP_001005369 GeneID:4528 MTIF2(163)/	Intra-Protein							NP_002444	GeneID:4528	MTIF2(144)	NP_002444	GeneID:4528	MTIF2(163)
	1	mice-tumour-7-F5-3-ex2_FS-65v.23361.23361.3.0.dta	3	1816	0.160369	0.0669645	0.003678	2.02533	1	0.00481518
258	EVKLSDYKGK(8)-KDSFLK(1)	2041.12	null	NP_005800 GeneID:7001 PRDX2(34)-NP_775928 GeneID:285315 C3orf33(196)/	Inter-Protein							NP_005800	GeneID:7001	PRDX2(34)	NP_775928	GeneID:285315	C3orf33(196)
	1	mice-tumour-7-F11-1-ex2_FS-45v.20495.20495.4.0.dta	4	2041.12	0.155349	0.434153	-0.001534	-0.751548	0.0196436	0.255572
259	EVNYIDKIK(7)-KYVGEK(1)	1982.08	null	NP_001880 GeneID:1429 CRYZ(208)-NP_001880 GeneID:1429 CRYZ(211)/NP_001880 GeneID:1429 CRYZ(208)-NP_001123514 GeneID:1429 CRYZ(211)/NP_001880 GeneID:1429 CRYZ(208)-NP_001128231 GeneID:1429 CRYZ(74)/NP_001123515 GeneID:1429 CRYZ(208)-NP_001880 GeneID:1429 CRYZ(211)/NP_001123515 GeneID:1429 CRYZ(208)-NP_001123514 GeneID:1429 CRYZ(211)/NP_001123515 GeneID:1429 CRYZ(208)-NP_001128231 GeneID:1429 CRYZ(…	Intra-Protein							NP_001880	GeneID:1429	CRYZ(208)	NP_001880	GeneID:1429	CRYZ(211)
	1	mice-tumour-7-F17-3-ex2_FS-65v.13667.13667.4.0.dta	4	1982.09	7.0396e-05	0.00298558	0.000941	0.474753	1.42994e-05	2.69862e-11
	2	mice-tumour-7-F17-1-ex2_FS-65v.13623.13623.4.0.dta	4	1982.08	8.3148e-06	0.027384	-0.000186	-0.093841	7.94706e-05	3.84551e-09
	3	mice-tumour-7-F17-3-ex2_FS-65v.13631.13631.3.1.dta	3	1982.08	0.000293305	0.211595	-0.003312	-1.67097	0.000698719	4.20735e-05
	4	mice-tumour-7-F17-1-ex2_FS-65v.13565.13565.4.1.dta	4	1982.09	0.144756	0.417597	0.000739	0.37284	0.282085	5.04391e-05
260	EVTPEGLQMVKK(11)-NHLEGKAAISNK(6)	2777.49	null	NP_001072992 GeneID:10606 PAICS(246)-NP_001072992 GeneID:10606 PAICS(53)/NP_001072992 GeneID:10606 PAICS(246)-NP_001072993 GeneID:10606 PAICS(53)/NP_001072992 GeneID:10606 PAICS(246)-NP_006443 GeneID:10606 PAICS(53)/NP_001072993 GeneID:10606 PAICS(253)-NP_001072992 GeneID:10606 PAICS(53)/NP_001072993 GeneID:10606 PAICS(253)-NP_001072993 GeneID:10606 PAICS(53)/NP_001072993 GeneID:10606 PAICS(253)-…	Intra-Protein							NP_001072993	GeneID:10606	PAICS(253)	NP_001072993	GeneID:10606	PAICS(53)
	1	mice-tumour-7-F13-3-ex2_FS-65V.14327.14327.4.2.dta	4	2777.48	1	0.0127952	-0.004067	-1.46427	1	0.00114158
	2	mice-tumour-7-F13-2-ex2_FS-65V.14283.14283.4.0.dta	4	2777.49	1	0.0150203	-0.001123	-0.404322	1	0.0776543
	3	mice-tumour-7-F13-1-ex2_FS-65V.14402.14402.4.0.dta	4	2777.49	1	0.139868	0.00378	1.36094	1	0.6168
261	EVVAKR(5)-MSLAFK(1)	1534.87	null	NP_054643 GeneID:5071 PRKN(32)-NP_002302 GeneID:3980 LIG3(1)/NP_054643 GeneID:5071 PRKN(32)-NP_039269 GeneID:3980 LIG3(1)/NP_004553 GeneID:5071 PRKN(32)-NP_002302 GeneID:3980 LIG3(1)/NP_004553 GeneID:5071 PRKN(32)-NP_039269 GeneID:3980 LIG3(1)/NP_054642 GeneID:5071 PRKN(32)-NP_002302 GeneID:3980 LIG3(1)/NP_054642 GeneID:5071 PRKN(32)-NP_039269 GeneID:3980 LIG3(1)/	Inter-Protein							NP_054643	GeneID:5071	PRKN(32)	NP_002302	GeneID:3980	LIG3(1)
	1	mice-tumour-7-F13-1-ex2_FS-65V.22125.22125.3.0.dta	3	1534.85	0.027868	0.491124	-0.012242	-7.97594	0.0386262	0.00384955
262	EVYELLDSPGKVLLQSK(11)-KLYEGK(1)	2792.53	null	NP_001072992 GeneID:10606 PAICS(30)-NP_001072992 GeneID:10606 PAICS(12)/NP_001072992 GeneID:10606 PAICS(30)-NP_001072993 GeneID:10606 PAICS(12)/NP_001072992 GeneID:10606 PAICS(30)-NP_006443 GeneID:10606 PAICS(12)/NP_001072993 GeneID:10606 PAICS(30)-NP_001072992 GeneID:10606 PAICS(12)/NP_001072993 GeneID:10606 PAICS(30)-NP_001072993 GeneID:10606 PAICS(12)/NP_001072993 GeneID:10606 PAICS(30)-NP_006…	Intra-Protein							NP_001072993	GeneID:10606	PAICS(30)	NP_001072993	GeneID:10606	PAICS(12)
	1	mice-tumour-7-F18-1-ex2_FS-45v.23817.23817.3.1.dta	3	2792.52	0.0546442	0.470448	-0.008466	-3.03166	0.100121	0.00539071
263	EYEAAVEQLKSEQIR(10)-DKWSNFDPTGLER(2)	3494.71	null	NP_114127 GeneID:83858 ATAD3B(104)-NP_114127 GeneID:83858 ATAD3B(46)/NP_114127 GeneID:83858 ATAD3B(104)-NP_001164006 GeneID:55210 ATAD3A(46)/NP_114127 GeneID:83858 ATAD3B(104)-NP_060658 GeneID:55210 ATAD3A(46)/NP_001164006 GeneID:55210 ATAD3A(104)-NP_114127 GeneID:83858 ATAD3B(46)/NP_001164006 GeneID:55210 ATAD3A(104)-NP_001164006 GeneID:55210 ATAD3A(46)/NP_001164006 GeneID:55210 ATAD3A(104)-NP_0…	Intra-Protein							NP_114127	GeneID:83858	ATAD3B(104)	NP_114127	GeneID:83858	ATAD3B(46)
												NP_114127	GeneID:83858	ATAD3B(104)	NP_001164006	GeneID:55210	ATAD3A(46)
												NP_001164006	GeneID:55210	ATAD3A(104)	NP_114127	GeneID:83858	ATAD3B(46)
												NP_001164006	GeneID:55210	ATAD3A(104)	NP_001164006	GeneID:55210	ATAD3A(46)
	1	mice-tumour-7-F1-3-ex2_FS-65V.29650.29650.4.0.dta	4	3494.71	1	8.48672e-06	0.003997	1.14373	1	0.000193474
	2	mice-tumour-7-F1-3-ex2_FS-65V.29631.29631.4.0.dta	4	3494.71	1	5.7898e-05	-0.000452	-0.129338	1	1
	3	mice-tumour-7-F1-2-ex2_FS-65V.29565.29565.4.0.dta	4	3494.7	1	0.000918959	-0.008207	-2.34841	1	1
	4	mice-tumour-7-F1-1-ex2_FS-65v.29842.29842.4.0.dta	4	3494.71	1	0.00478163	0.00359	1.02727	1	1
	5	mice-tumour-7-F20-2-ex2_FS-65v.27831.27831.4.0.dta	4	3494.7	1	0.00541431	-0.004455	-1.27479	1	1
	6	mice-tumour-7-F20-3-ex2_FS-65v.27896.27896.4.1.dta	4	3494.71	1	0.00692079	-0.000968	-0.27699	1	0.688401
	7	mice-tumour-7-F1-1-ex2_FS-65v.29816.29816.4.0.dta	4	3494.71	0.116169	0.00749728	0.00359	1.02727	1	0.0253085
264	EYEAAVEQLKSEQIR(10)-KTLSEETR(1)	2893.48	null	NP_114127 GeneID:83858 ATAD3B(104)-NP_114127 GeneID:83858 ATAD3B(117)/NP_114127 GeneID:83858 ATAD3B(104)-NP_001164006 GeneID:55210 ATAD3A(117)/NP_114127 GeneID:83858 ATAD3B(104)-NP_001164007 GeneID:55210 ATAD3A(38)/NP_114127 GeneID:83858 ATAD3B(104)-NP_060658 GeneID:55210 ATAD3A(165)/NP_001164006 GeneID:55210 ATAD3A(104)-NP_114127 GeneID:83858 ATAD3B(117)/NP_001164006 GeneID:55210 ATAD3A(104)-NP_…	Intra-Protein							NP_114127	GeneID:83858	ATAD3B(104)	NP_114127	GeneID:83858	ATAD3B(117)
												NP_114127	GeneID:83858	ATAD3B(104)	NP_001164006	GeneID:55210	ATAD3A(117)
												NP_001164006	GeneID:55210	ATAD3A(104)	NP_114127	GeneID:83858	ATAD3B(117)
												NP_001164006	GeneID:55210	ATAD3A(104)	NP_001164006	GeneID:55210	ATAD3A(117)
	1	mice-tumour-7-F19-1-ex2_FS-65v.17757.17757.4.1.dta	4	2893.47	2.30976e-08	0.000381774	-0.007638	-2.63973	1	1.85354e-09
	2	mice-tumour-7-F19-1-ex2_FS-65v.17766.17766.4.2.dta	4	2893.47	8.27167e-08	0.0014622	-0.007638	-2.63973	1	2.47386e-07
	3	mice-tumour-7-F19-2-ex2_FS-65v.17657.17657.4.0.dta	4	2893.47	0.0269492	0.00186522	-0.011971	-4.13723	1	0.00209902
	4	mice-tumour-7-F19-3-ex2_FS-65v.17653.17653.4.1.dta	4	2893.47	0.000164987	0.00247465	-0.009256	-3.19892	0.00357956	2.10892e-05
	5	mice-tumour-7-F19-3-ex2_FS-65v.17671.17671.4.1.dta	4	2893.47	2.1361e-06	0.154859	-0.0089	-3.07588	1	0.000126897
265	EYGVKVLGTSVESIMATEDR(5)-QLFSDKLNEINEK(6)	3898.96	null	NP_001116105 GeneID:1373 CPS1(538)-NP_001116105 GeneID:1373 CPS1(559)/NP_001116105 GeneID:1373 CPS1(538)-NP_001866 GeneID:1373 CPS1(553)/NP_001116105 GeneID:1373 CPS1(538)-NP_001116106 GeneID:1373 CPS1(102)/NP_001866 GeneID:1373 CPS1(532)-NP_001116105 GeneID:1373 CPS1(559)/NP_001866 GeneID:1373 CPS1(532)-NP_001866 GeneID:1373 CPS1(553)/NP_001866 GeneID:1373 CPS1(532)-NP_001116106 GeneID:1373 CPS1…	Intra-Protein							NP_001866	GeneID:1373	CPS1(532)	NP_001866	GeneID:1373	CPS1(553)
	1	mice-tumour-7-F1-1-ex2_FS-45.29385.29385.4.0.dta	4	3898.97	8.8723e-06	0.000557528	0.00349	0.89511	1.0526e-08	1.59487e-05
266	EYTAAVEAKQVAQQEAQR(9)-AQFLVEKAK(7)	3190.67	null	NP_001138303 GeneID:11331 PHB2(200)-NP_001138303 GeneID:11331 PHB2(216)/	Intra-Protein							NP_001138303	GeneID:11331	PHB2(200)	NP_001138303	GeneID:11331	PHB2(216)
	1	mice-tumour-7-F16-3-ex2_FS-45v.18165.18165.4.0.dta	4	3190.66	0.081306	0.000854875	-0.009661	-3.02789	1.70174e-10	0.139209
	2	mice-tumour-7-F16-2-ex2_FS-45v.18152.18152.4.0.dta	4	3190.66	0.54981	0.0358868	-0.017117	-5.3647	1.28457e-08	0.452557
	3	mice-tumour-7-F16-1-ex2_FS-45v.18146.18146.4.0.dta	4	3190.66	0.939604	0.231132	-0.014894	-4.66798	1.61095e-08	1
	4	mice-tumour-7-F16-2-ex2_FS-45v.18265.18265.4.2.dta	4	3190.65	1	0.244438	-0.021813	-6.83649	0.0405157	1
267	EYTAAVEAKQVAQQEAQR(9)-FVVEKAEQQK(5)	3362.72	null	NP_001138303 GeneID:11331 PHB2(200)-NP_002625 GeneID:5245 PHB(202)/NP_001138303 GeneID:11331 PHB2(200)-NP_001268425 GeneID:5245 PHB(202)/NP_001138303 GeneID:11331 PHB2(200)-NP_001268644 GeneID:5245 PHB(202)/	Inter-Protein							NP_001138303	GeneID:11331	PHB2(200)	NP_002625	GeneID:5245	PHB(202)
	1	mice-tumour-7-F18-3-ex2_FS-45v.17094.17094.4.0.dta	4	3362.71	0.088872	0.00732369	-0.009964	-2.96307	0.00205725	0.0132338
	2	mice-tumour-7-F18-1-ex2_FS-45v.17114.17114.4.1.dta	4	3362.72	0.800313	0.543297	-7.6e-05	-0.022601	6.17791e-07	0.13741
268	EYTAAVEAKQVAQQEAQR(9)-SVVAKFNASQLITQR(5)	3819	null	NP_001138303 GeneID:11331 PHB2(200)-NP_001138303 GeneID:11331 PHB2(147)/NP_001138303 GeneID:11331 PHB2(200)-NP_001254629 GeneID:11331 PHB2(147)/	Intra-Protein							NP_001138303	GeneID:11331	PHB2(200)	NP_001138303	GeneID:11331	PHB2(147)
	1	mice-tumour-7-F12-1-ex2_FS-45v.23741.23741.4.0.dta	4	3818.98	9.81083e-06	0.000125324	-0.021497	-5.62896	2.26158e-08	3.23085e-06
	2	mice-tumour-7-F13-1-ex2_FS-45V.23829.23829.4.0.dta	4	3819	1.76199e-11	0.000466498	-0.004866	-1.27415	3.24761e-11	7.85246e-10
	3	mice-tumour-7-F13-2-ex2_FS-45V.23737.23737.4.0.dta	4	3818.99	1.17073e-05	0.0021457	-0.009088	-2.37968	2.49655e-08	2.16104e-13
	4	mice-tumour-7-F13-3-ex2_FS-45V.23832.23832.4.0.dta	4	3819	4.3983e-13	0.00934708	-0.004865	-1.27389	2.17631e-08	3.50709e-10
	5	mice-tumour-7-F12-2-ex2_FS-45v.23705.23705.4.1.dta	4	3818.98	0.00357208	0.0153079	-0.02433	-6.37077	0.000395536	3.28373e-05
269	FFQKADGVPVYLK(4)-NKVPELQK(2)	2604.44	null	NP_004709 GeneID:9167 COX7A2L(69)-NP_004709 GeneID:9167 COX7A2L(59)/	Intra-Protein							NP_004709	GeneID:9167	COX7A2L(69)	NP_004709	GeneID:9167	COX7A2L(59)
	1	mice-tumour-7-F16-3-ex2_FS-45v.19467.19467.4.0.dta	4	2604.44	3.51788e-06	3.31976e-05	-0.000752	-0.288737	2.33808e-09	1.14698e-06
	2	mice-tumour-7-F16-2-ex2_FS-45v.19404.19404.4.0.dta	4	2604.44	2.92489e-08	0.0020179	0.001163	0.446545	1.24709e-08	6.38434e-10
	3	mice-tumour-7-F16-1-ex2_FS-45v.19498.19498.4.3.dta	4	2604.44	1.70166e-06	0.211937	-0.001056	-0.405461	2.47086e-06	6.77681e-06
270	FFVADTANEALEAAKR(15)-EIVLKAQILAGGR(5)	3257.79	null	NP_001171070 GeneID:8801 SUCLG2(73)-NP_001171070 GeneID:8801 SUCLG2(83)/NP_001171070 GeneID:8801 SUCLG2(73)-NP_003839 GeneID:8801 SUCLG2(83)/NP_003839 GeneID:8801 SUCLG2(73)-NP_001171070 GeneID:8801 SUCLG2(83)/NP_003839 GeneID:8801 SUCLG2(73)-NP_003839 GeneID:8801 SUCLG2(83)/	Intra-Protein							NP_003839	GeneID:8801	SUCLG2(73)	NP_003839	GeneID:8801	SUCLG2(83)
	1	mice-tumour-7-F19-1-ex2_FS-65v.29791.29791.4.2.dta	4	3257.76	1	0.221794	-0.026352	-8.08892	1	1
271	FGGGNPELLTQMVSKGFLGR(15)-SGKGFYIYQEGVK(3)	3720.91	null	NP_000173 GeneID:3030 HADHA(625)-NP_000173 GeneID:3030 HADHA(634)/	Intra-Protein							NP_000173	GeneID:3030	HADHA(625)	NP_000173	GeneID:3030	HADHA(634)
	1	mice-tumour-7-F18-3-ex2_FS-45v.29899.29899.4.0.dta	4	3720.9	6.64708e-07	1.19511e-11	-0.006021	-1.61815	2.78097e-07	5.46675e-07
272	FGKTIMEEQLVLK(3)-IHELKQAK(5)	2639.48	null	NP_054768 GeneID:28976 ACAD9(521)-NP_054768 GeneID:28976 ACAD9(456)/	Intra-Protein							NP_054768	GeneID:28976	ACAD9(521)	NP_054768	GeneID:28976	ACAD9(456)
	1	mice-tumour-7-F16-3-ex2_FS-45v.16567.16567.4.0.dta	4	2639.48	0.00028448	0.00703226	-0.004947	-1.87423	7.98125e-09	0.000419665
	2	mice-tumour-7-F16-2-ex2_FS-45v.16573.16573.4.1.dta	4	2639.48	0.0234508	0.0823611	-0.004071	-1.54235	0.000100452	0.0708963
	3	mice-tumour-7-F16-1-ex2_FS-45v.16579.16579.4.1.dta	4	2639.49	0.0035923	0.15029	0.001166	0.441753	3.79171e-07	0.00795939
273	FGNEVIPVTVTVKGQPDVVVK(13)-VDFSKVPK(5)	3281.84	null	NP_000010 GeneID:38 ACAT1(243)-NP_000010 GeneID:38 ACAT1(263)/	Intra-Protein							NP_000010	GeneID:38	ACAT1(243)	NP_000010	GeneID:38	ACAT1(263)
	1	mice-tumour-7-F16-3-ex2_FS-45v.23884.23884.4.0.dta	4	3281.84	1	0.0463228	-0.004296	-1.30902	8.35941e-06	0.995792
274	FHHAHCKK(7)-KGGMEVR(1)	1977.99	Carbamidomethyl[C](6)	NP_076996 GeneID:79072 FASTKD3(63)-NP_076996 GeneID:79072 FASTKD3(210)/	Intra-Protein							NP_076996	GeneID:79072	FASTKD3(63)	NP_076996	GeneID:79072	FASTKD3(210)
	1	mice-tumour-7-F12-3-ex2_FS-65V.13771.13771.3.0.dta	3	1977.99	0.163256	0.421287	0.00348	1.75936	0.305281	0.0793677
275	FHINQPALKQR(9)-EAILKLILK(5)	2529.53	null	NP_116199 GeneID:84896 ATAD1(263)-NP_116199 GeneID:84896 ATAD1(270)/	Intra-Protein							NP_116199	GeneID:84896	ATAD1(263)	NP_116199	GeneID:84896	ATAD1(270)
	1	mice-tumour-7-F14-3-ex2_FS-65V.25762.25762.4.0.dta	4	2529.53	0.000900999	0.00650402	-0.001771	-0.700131	0.00164327	0.0039904
	2	mice-tumour-7-F14-2-ex2_FS-65V.25802.25802.4.0.dta	4	2529.52	0.00186316	0.00697641	-0.00473	-1.86991	0.00271813	0.000419452
	3	mice-tumour-7-F14-1-ex2_FS-65V.25876.25876.4.0.dta	4	2529.52	0.000168402	0.0799556	-0.004087	-1.61572	1.18532e-05	0.00149758
	4	mice-tumour-7-F14-2-ex2_FS-65V.25762.25762.4.1.dta	4	2529.52	0.845574	0.410004	-0.00473	-1.86991	1	0.627673
276	FHINQPALKQR(9)-LILKNENVDR(4)	2702.51	null	NP_116199 GeneID:84896 ATAD1(263)-NP_116199 GeneID:84896 ATAD1(274)/	Intra-Protein							NP_116199	GeneID:84896	ATAD1(263)	NP_116199	GeneID:84896	ATAD1(274)
	1	mice-tumour-7-F11-3-ex2_FS-65v.15996.15996.4.0.dta	4	2702.51	0.452027	0.00978637	-0.004595	-1.70027	0.000398602	0.338653
	2	mice-tumour-7-F11-1-ex2_FS-65v.16209.16209.4.1.dta	4	2702.5	0.171566	0.0515464	-0.007275	-2.69194	0.0135042	0.091445
277	FIHVSHLNANIKSSSR(12)-NKAVGEK(2)	2692.45	null	NP_004993 GeneID:4704 NDUFA9(175)-NP_004993 GeneID:4704 NDUFA9(184)/	Intra-Protein							NP_004993	GeneID:4704	NDUFA9(175)	NP_004993	GeneID:4704	NDUFA9(184)
	1	mice-tumour-7-F8-3-ex2_FS-45v.8027.8027.5.1.dta	5	2692.45	0.00030862	0.000807992	-0.007095	-2.63514	0.00139972	1.13605e-05
	2	mice-tumour-7-F8-1-ex2_FS-45V.7804.7804.5.3.dta	5	2692.45	0.00278038	0.0387245	-0.003944	-1.46484	0.00280246	6.14395e-05
278	FIKIIEVK(3)-KLVELLR(1)	1997.28	null	NP_004784 GeneID:9361 LONP1(140)-NP_004784 GeneID:9361 LONP1(148)/NP_004784 GeneID:9361 LONP1(140)-NP_001263408 GeneID:9361 LONP1(84)/NP_001263408 GeneID:9361 LONP1(76)-NP_004784 GeneID:9361 LONP1(148)/NP_001263408 GeneID:9361 LONP1(76)-NP_001263408 GeneID:9361 LONP1(84)/	Intra-Protein							NP_004784	GeneID:9361	LONP1(140)	NP_004784	GeneID:9361	LONP1(148)
	1	mice-tumour-7-F18-3-ex2_FS-45v.24824.24824.4.0.dta	4	1997.28	4.33521e-10	3.07209e-23	0.00149	0.746016	2.12724e-07	1.6574e-08
	2	mice-tumour-7-F18-2-ex2_FS-45v.24777.24777.4.0.dta	4	1997.28	1.67421e-08	2.34476e-08	-0.000455	-0.22781	5.0173e-09	3.32599e-07
	3	mice-tumour-7-F18-1-ex2_FS-45v.24867.24867.4.0.dta	4	1997.28	9.67328e-10	0.00124222	0.002089	1.04592	5.74148e-07	1.0877e-08
279	FIVDGWHEMDAENPLHQPSPSLNKLVAENK(24)-KTGEGFYK(1)	4482.21	null	NP_001171634 GeneID:3033 HADH(312)-NP_001171634 GeneID:3033 HADH(322)/NP_001171634 GeneID:3033 HADH(312)-NP_005318 GeneID:3033 HADH(305)/NP_005318 GeneID:3033 HADH(295)-NP_001171634 GeneID:3033 HADH(322)/NP_005318 GeneID:3033 HADH(295)-NP_005318 GeneID:3033 HADH(305)/	Intra-Protein							NP_001171634	GeneID:3033	HADH(312)	NP_001171634	GeneID:3033	HADH(322)
	1	mice-tumour-7-F1-3-ex2_FS-65V.26021.26021.6.0.dta	6	4482.2	1	0.0683204	-0.009793	-2.18486	1	1
	2	mice-tumour-7-F1-2-ex2_FS-65V.25980.25980.6.2.dta	6	4482.19	0.00216997	0.087338	-0.0142	-3.16808	1	2.36024e-05
280	FKDSWREIWK(2)-VYQMKSKPR(7)	2668.41	null	NP_775928 GeneID:285315 C3orf33(187)-NP_001219 GeneID:841 CASP8(248)/NP_775928 GeneID:285315 C3orf33(187)-NP_203519 GeneID:841 CASP8(231)/NP_775928 GeneID:285315 C3orf33(187)-NP_001073593 GeneID:841 CASP8(216)/NP_775928 GeneID:285315 C3orf33(187)-NP_203520 GeneID:841 CASP8(216)/NP_775928 GeneID:285315 C3orf33(187)-NP_001073594 GeneID:841 CASP8(290)/	Inter-Protein							NP_775928	GeneID:285315	C3orf33(187)	NP_001073594	GeneID:841	CASP8(290)
	1	mice-tumour-7-F19-1-ex2_FS-45v.13940.13940.6.1.dta	6	2668.39	0.318061	0.32705	-0.017027	-6.38096	0.941412	0.151357
281	FKEQLTPSQIMSLEK(2)-AEWQVYKEEISR(7)	3469.76	Oxidation[M](11)	NP_003192 GeneID:7019 TFAM(118)-NP_003192 GeneID:7019 TFAM(111)/NP_003192 GeneID:7019 TFAM(118)-NP_001257711 GeneID:7019 TFAM(111)/NP_001257711 GeneID:7019 TFAM(118)-NP_003192 GeneID:7019 TFAM(111)/NP_001257711 GeneID:7019 TFAM(118)-NP_001257711 GeneID:7019 TFAM(111)/	Intra-Protein							NP_003192	GeneID:7019	TFAM(118)	NP_003192	GeneID:7019	TFAM(111)
	1	mice-tumour-7-F19-1-ex2_FS-45v.23373.23373.4.3.dta	4	3469.74	0.000342978	8.83041e-06	-0.013672	-3.94034	0.00515209	2.0077e-05
	2	mice-tumour-7-F19-1-ex2_FS-45v.25823.25823.4.0.dta	4	3453.75	1.66339e-07	7.0466e-05	-0.006828	-1.97697	2.3858e-09	5.56298e-07
	3	mice-tumour-7-F19-3-ex2_FS-45v.25745.25745.4.0.dta	4	3453.75	3.43771e-07	0.00017453	-0.006602	-1.91154	2.44393e-08	4.77222e-08
	4	mice-tumour-7-F19-2-ex2_FS-45v.25808.25808.4.0.dta	4	3453.76	8.38716e-07	0.00409408	-0.00415	-1.20159	4.50614e-08	2.32747e-07
	5	mice-tumour-7-F19-2-ex2_FS-45v.23394.23394.4.0.dta	4	3469.75	0.0196778	0.0226975	-0.004271	-1.23092	0.00965679	9.11828e-06
	6	mice-tumour-7-F20-1-ex2_FS-45v.25863.25863.4.0.dta	4	3453.76	0.000721463	0.0720044	-0.003676	-1.06435	0.0167153	0.00186283
282	FKEQLTPSQIMSLEK(2)-EIMDKHLK(5)	2929.54	null	NP_003192 GeneID:7019 TFAM(118)-NP_003192 GeneID:7019 TFAM(136)/NP_003192 GeneID:7019 TFAM(118)-NP_001257711 GeneID:7019 TFAM(136)/NP_001257711 GeneID:7019 TFAM(118)-NP_003192 GeneID:7019 TFAM(136)/NP_001257711 GeneID:7019 TFAM(118)-NP_001257711 GeneID:7019 TFAM(136)/	Intra-Protein							NP_003192	GeneID:7019	TFAM(118)	NP_003192	GeneID:7019	TFAM(136)
	1	mice-tumour-7-F17-3-ex2_FS-45v.19959.19959.4.2.dta	4	2929.54	0.01258	0.00653842	-0.000391	-0.133468	2.25285e-07	0.0432962
	2	mice-tumour-7-F18-2-ex2_FS-45v.20160.20160.4.0.dta	4	2929.53	0.153286	0.00745957	-0.00753	-2.57037	2.92166e-09	0.34104
	3	mice-tumour-7-F18-1-ex2_FS-45v.20252.20252.4.1.dta	4	2929.54	0.094563	0.159479	-0.00291	-0.99333	4.44313e-07	0.263843
283	FKEQLTPSQIMSLEK(2)-FSKEQLPIFK(3)	3152.7	null	NP_003192 GeneID:7019 TFAM(118)-NP_003192 GeneID:7019 TFAM(62)/NP_003192 GeneID:7019 TFAM(118)-NP_001257711 GeneID:7019 TFAM(62)/NP_001257711 GeneID:7019 TFAM(118)-NP_003192 GeneID:7019 TFAM(62)/NP_001257711 GeneID:7019 TFAM(118)-NP_001257711 GeneID:7019 TFAM(62)/	Intra-Protein							NP_003192	GeneID:7019	TFAM(118)	NP_003192	GeneID:7019	TFAM(62)
	1	mice-tumour-7-F18-3-ex2_FS-45v.27993.27993.4.0.dta	4	3152.69	0.000862317	5.47743e-11	-0.004162	-1.32014	1.12219e-05	0.00136641
	2	mice-tumour-7-F18-2-ex2_FS-45v.27961.27961.4.0.dta	4	3152.69	3.72739e-05	0.000620515	-0.005099	-1.61735	2.54527e-06	0.000144142
	3	mice-tumour-7-F18-1-ex2_FS-45v.28042.28042.3.0.dta	3	3152.7	0.000817395	0.0607349	0.001877	0.595364	0.0166373	0.0457168
284	FKKEDEIPETVSLEMLDAAK(2)-KILIWSGR(1)	3402.82	null	NP_055182 GeneID:26355 FAM162A(78)-NP_055182 GeneID:26355 FAM162A(69)/	Intra-Protein							NP_055182	GeneID:26355	FAM162A(78)	NP_055182	GeneID:26355	FAM162A(69)
	1	mice-tumour-7-F20-2-ex2_FS-65v.29303.29303.4.0.dta	4	3402.81	0.00217444	2.49066e-17	-0.009831	-2.88907	2.43286e-13	0.000261792
	2	mice-tumour-7-F20-3-ex2_FS-65v.29355.29355.4.0.dta	4	3402.82	0.00178552	2.90751e-05	-0.006552	-1.92546	1	7.22431e-05
	3	mice-tumour-7-F20-1-ex2_FS-65v.29380.29380.4.0.dta	4	3402.82	0.000524489	0.00817578	-0.005679	-1.66891	3.54891e-09	2.10398e-05
285	FKLWYTLDR(2)-NKHSAR(2)	2091.11	null	NP_001123291 GeneID:1727 CYB5R3(211)-NP_001123291 GeneID:1727 CYB5R3(205)/NP_001123291 GeneID:1727 CYB5R3(211)-NP_000389 GeneID:1727 CYB5R3(228)/NP_001123291 GeneID:1727 CYB5R3(211)-NP_001165131 GeneID:1727 CYB5R3(261)/NP_001123291 GeneID:1727 CYB5R3(211)-NP_001165132 GeneID:1727 CYB5R3(205)/NP_001123291 GeneID:1727 CYB5R3(211)-NP_015565 GeneID:1727 CYB5R3(205)/NP_000389 GeneID:1727 CYB5R3(234)-N…	Intra-Protein							NP_001123291	GeneID:1727	CYB5R3(211)	NP_001123291	GeneID:1727	CYB5R3(205)
	1	mice-tumour-7-F9-3-ex2_FS-65v.17482.17482.4.0.dta	4	2091.11	2.05613e-05	5.1996e-08	-0.000427	-0.204197	2.16079e-10	2.36461e-05
	2	mice-tumour-7-F9-2-ex2_FS-65V.17424.17424.4.0.dta	4	2091.11	0.00364515	6.92816e-07	0.000233	0.111424	1.34449e-11	0.00174279
	3	mice-tumour-7-F9-1-ex2_FS-65v.17258.17258.4.0.dta	4	2091.11	0.00151008	1.85393e-06	-0.002066	-0.98799	1.6976e-10	0.00203004
286	FLDKARER(4)-KDQEAKER(1)	2175.15	null	NP_003767 GeneID:64976 MRPL40(97)-NP_003767 GeneID:64976 MRPL40(60)/	Intra-Protein							NP_003767	GeneID:64976	MRPL40(97)	NP_003767	GeneID:64976	MRPL40(60)
	1	mice-tumour-7-F2-3-ex2_FS-65V.33219.33219.4.1.dta	4	2175.17	1	0.226928	0.015355	7.05928	1	1
287	FLENKSPWR(5)-KMVHGVYK(1)	2275.21	null	NP_877416 GeneID:4712 NDUFB6(54)-NP_877416 GeneID:4712 NDUFB6(59)/NP_877416 GeneID:4712 NDUFB6(54)-NP_002484 GeneID:4712 NDUFB6(59)/NP_001186916 GeneID:4712 NDUFB6(54)-NP_877416 GeneID:4712 NDUFB6(59)/NP_001186916 GeneID:4712 NDUFB6(54)-NP_002484 GeneID:4712 NDUFB6(59)/NP_002484 GeneID:4712 NDUFB6(54)-NP_877416 GeneID:4712 NDUFB6(59)/NP_002484 GeneID:4712 NDUFB6(54)-NP_002484 GeneID:4712 NDUFB6(5…	Intra-Protein							NP_002484	GeneID:4712	NDUFB6(54)	NP_002484	GeneID:4712	NDUFB6(59)
	1	mice-tumour-7-F12-3-ex2_FS-45V.12895.12895.5.2.dta	5	2275.2	0.0101273	0.170957	-0.004732	-2.07981	0.00113712	0.0108588
288	FLQDTIEEMALKNK(12)-AAKGSATK(3)	2550.35	null	NP_036450 GeneID:3954 LETM1(274)-NP_036450 GeneID:3954 LETM1(279)/	Intra-Protein							NP_036450	GeneID:3954	LETM1(274)	NP_036450	GeneID:3954	LETM1(279)
	1	mice-tumour-7-F16-2-ex2_FS-65v.20604.20604.4.0.dta	4	2550.34	3.95686e-06	6.77872e-05	-0.010975	-4.30333	0.000736483	7.25422e-08
	2	mice-tumour-7-F16-3-ex2_FS-65v.20507.20507.4.0.dta	4	2550.34	7.35313e-05	0.29254	-0.008061	-3.16074	1.28029e-05	1.81911e-05
289	FLQDTIEEMALKNK(12)-GSATKDFSVFFQK(5)	3278.67	null	NP_036450 GeneID:3954 LETM1(274)-NP_036450 GeneID:3954 LETM1(284)/	Intra-Protein							NP_036450	GeneID:3954	LETM1(274)	NP_036450	GeneID:3954	LETM1(284)
	1	mice-tumour-7-F20-3-ex2_FS-65v.30480.30480.4.2.dta	4	3278.67	5.4071e-09	0.000428655	0.00014	0.0427	0.000182717	9.07023e-07
290	FLSQPFQVAEVFTGHMGKLVPLK(18)-ADKLAEEHSS(3)	3796.96	null	NP_001677 GeneID:506 ATP5F1B(480)-NP_001677 GeneID:506 ATP5F1B(522)/	Intra-Protein							NP_001677	GeneID:506	ATP5F1B(480)	NP_001677	GeneID:506	ATP5F1B(522)
	1	mice-tumour-7-F2-3-ex2_FS-45V.29088.29088.5.0.dta	5	3796.95	0.000345793	0.000129257	-0.007087	-1.86649	1	0.00226481
	2	mice-tumour-7-F1-2-ex2_FS-45V.29857.29857.5.0.dta	5	3796.97	0.00020745	0.00285515	0.009153	2.41061	3.19475e-09	0.000275068
	3	mice-tumour-7-F1-1-ex2_FS-45.29832.29832.5.0.dta	5	3796.97	3.41354e-06	0.00586273	0.008505	2.23995	9.11087e-10	1.32214e-05
	4	mice-tumour-7-F1-2-ex2_FS-45V.28180.28180.5.0.dta	5	3812.95	0.00211947	0.00695635	-0.009204	-2.41387	5.15522e-05	0.000616356
	5	mice-tumour-7-F1-1-ex2_FS-45.28181.28181.5.0.dta	5	3812.95	0.000824201	0.0246267	-0.005699	-1.49464	0.000643743	0.00115735
	6	mice-tumour-7-F1-2-ex2_FS-45V.29829.29829.5.0.dta	5	3796.97	1	0.0830378	0.009153	2.41061	0.0356226	1
	7	mice-tumour-7-F1-3-ex2_FS-45V.28143.28143.5.0.dta	5	3812.93	0.000191155	0.114149	-0.024684	-6.47372	0.235066	0.000867941
	8	mice-tumour-7-F2-2-ex2-_FS-45v.29014.29014.5.0.dta	5	3796.96	1	0.252395	-0.002606	-0.686338	1	1
291	FMEKLIR(4)-MAAALR(1)	1705.95	null	NP_060887 GeneID:55811 ADCY10(659)-NP_001171485 GeneID:5096 PCCB(1)/NP_060887 GeneID:55811 ADCY10(659)-NP_000523 GeneID:5096 PCCB(1)/NP_001161221 GeneID:55811 ADCY10(506)-NP_001171485 GeneID:5096 PCCB(1)/NP_001161221 GeneID:55811 ADCY10(506)-NP_000523 GeneID:5096 PCCB(1)/	Inter-Protein							NP_060887	GeneID:55811	ADCY10(659)	NP_001171485	GeneID:5096	PCCB(1)
	1	mice-tumour-7-F13-1-ex2_FS-65V.32161.32161.3.0.dta	3	1705.95	0.893543	0.274511	0.004861	2.84944	1	0.289703
292	FPSHFSSDLKDLLR(10)-NLLQVDLTKR(9)	2998.64	null	NP_002721 GeneID:5566 PRKACA(267)-NP_002721 GeneID:5566 PRKACA(280)/NP_002721 GeneID:5566 PRKACA(267)-NP_997401 GeneID:5566 PRKACA(272)/NP_997401 GeneID:5566 PRKACA(259)-NP_002721 GeneID:5566 PRKACA(280)/NP_997401 GeneID:5566 PRKACA(259)-NP_997401 GeneID:5566 PRKACA(272)/	Intra-Protein							NP_002721	GeneID:5566	PRKACA(267)	NP_002721	GeneID:5566	PRKACA(280)
	1	mice-tumour-7-F18-3-ex2_FS-65v.29958.29958.5.0.dta	5	2998.63	0.0323548	0.066707	-0.007109	-2.37074	0.0215607	0.0276669
293	FQTKIPNIYAIGDVVAGPMLAHK(4)-ITGKNQVTATK(4)	3781.07	null	NP_000099 GeneID:1738 DLD(346)-NP_000099 GeneID:1738 DLD(159)/NP_000099 GeneID:1738 DLD(346)-NP_001276679 GeneID:1738 DLD(60)/NP_000099 GeneID:1738 DLD(346)-NP_001276680 GeneID:1738 DLD(136)/NP_001276679 GeneID:1738 DLD(247)-NP_000099 GeneID:1738 DLD(159)/NP_001276679 GeneID:1738 DLD(247)-NP_001276679 GeneID:1738 DLD(60)/NP_001276679 GeneID:1738 DLD(247)-NP_001276680 GeneID:1738 DLD(136)/NP_00127…	Intra-Protein							NP_001276680	GeneID:1738	DLD(323)	NP_001276680	GeneID:1738	DLD(136)
	1	mice-tumour-7-F16-2-ex2_FS-45v.27390.27390.5.2.dta	5	3781.08	0.00229082	0.000635197	0.009231	2.44137	8.91507e-08	0.00158432
	2	mice-tumour-7-F16-2-ex2_FS-45v.27410.27410.5.2.dta	5	3781.08	0.00171135	0.00362034	0.009231	2.44137	2.71957e-07	0.00505395
	3	mice-tumour-7-F16-1-ex2_FS-45v.27412.27412.5.2.dta	5	3781.08	0.000989459	0.0100223	0.010506	2.77858	3.70542e-10	0.000700712
	4	mice-tumour-7-F16-3-ex2_FS-45v.27505.27505.5.3.dta	5	3781.09	0.0260507	0.259629	0.014931	3.94888	0.000102899	0.0149821
294	FSKEQLPIFK(3)-KPVSSYLR(1)	2323.31	null	NP_003192 GeneID:7019 TFAM(62)-NP_003192 GeneID:7019 TFAM(52)/NP_003192 GeneID:7019 TFAM(62)-NP_001257711 GeneID:7019 TFAM(52)/NP_001257711 GeneID:7019 TFAM(62)-NP_003192 GeneID:7019 TFAM(52)/NP_001257711 GeneID:7019 TFAM(62)-NP_001257711 GeneID:7019 TFAM(52)/	Intra-Protein							NP_003192	GeneID:7019	TFAM(62)	NP_003192	GeneID:7019	TFAM(52)
	1	mice-tumour-7-F12-1-ex2_FS-65v.24804.24804.3.0.dta	3	2323.3	2.22861e-05	0.000810588	-0.003809	-1.63947	0.0010603	1.68034e-09
	2	mice-tumour-7-F12-2-ex2_FS-65v.24612.24612.3.0.dta	3	2323.3	8.38345e-05	0.000889385	-0.002556	-1.10016	0.00137943	1.18259e-07
	3	mice-tumour-7-F12-3-ex2_FS-65V.24318.24318.3.0.dta	3	2323.3	0.00255723	0.103262	-0.003854	-1.65884	0.00437245	2.49837e-06
295	FSKILENLR(3)-IPKLSK(3)	1942.17	null	NP_001093206 GeneID:1160 CKMT2(344)-NP_001093206 GeneID:1160 CKMT2(335)/NP_001093206 GeneID:1160 CKMT2(344)-NP_001093205 GeneID:1160 CKMT2(335)/NP_001093206 GeneID:1160 CKMT2(344)-NP_001816 GeneID:1160 CKMT2(335)/NP_001093205 GeneID:1160 CKMT2(344)-NP_001093206 GeneID:1160 CKMT2(335)/NP_001093205 GeneID:1160 CKMT2(344)-NP_001093205 GeneID:1160 CKMT2(335)/NP_001093205 GeneID:1160 CKMT2(344)-NP_001…	Intra-Protein							NP_001093206	GeneID:1160	CKMT2(344)	NP_001093206	GeneID:1160	CKMT2(335)
	1	mice-tumour-7-F14-2-ex2_FS-45V.18645.18645.4.1.dta	4	1942.17	0.00206861	1.03781e-05	-0.000753	-0.38771	7.32309e-06	0.0111464
	2	mice-tumour-7-F14-1-ex2_FS-45V.18728.18728.4.1.dta	4	1942.17	0.00131583	1.50759e-05	-0.001085	-0.558652	3.97858e-06	0.0124616
296	FSKILENLR(3)-LSKDPR(3)	1972.12	null	NP_001093206 GeneID:1160 CKMT2(344)-NP_001093206 GeneID:1160 CKMT2(338)/NP_001093206 GeneID:1160 CKMT2(344)-NP_001093205 GeneID:1160 CKMT2(338)/NP_001093206 GeneID:1160 CKMT2(344)-NP_001816 GeneID:1160 CKMT2(338)/NP_001093205 GeneID:1160 CKMT2(344)-NP_001093206 GeneID:1160 CKMT2(338)/NP_001093205 GeneID:1160 CKMT2(344)-NP_001093205 GeneID:1160 CKMT2(338)/NP_001093205 GeneID:1160 CKMT2(344)-NP_001…	Intra-Protein							NP_001093206	GeneID:1160	CKMT2(344)	NP_001093206	GeneID:1160	CKMT2(338)
	1	mice-tumour-7-F12-3-ex2_FS-45V.15989.15989.4.0.dta	4	1972.12	0.00829967	0.189843	-0.001936	-0.981683	0.000158659	0.00337881
297	FVDLYGAQKIVDR(9)-KYEAAYGK(1)	2590.36	null	NP_000173 GeneID:3030 HADHA(728)-NP_000173 GeneID:3030 HADHA(735)/	Intra-Protein							NP_000173	GeneID:3030	HADHA(728)	NP_000173	GeneID:3030	HADHA(735)
	1	mice-tumour-7-F18-2-ex2_FS-45v.18155.18155.3.0.dta	3	2590.35	0.00184792	0.0230513	-0.009384	-3.62267	0.00333956	0.00031753
298	FVDSKSG(5)-KTLLDR(1)	1621.88	null	NP_004068 GeneID:1431 CS(464)-NP_037460 GeneID:29920 PYCR2(284)/NP_004068 GeneID:1431 CS(464)-NP_001258610 GeneID:29920 PYCR2(210)/	Inter-Protein							NP_004068	GeneID:1431	CS(464)	NP_037460	GeneID:29920	PYCR2(284)
	1	mice-tumour-7-F11-1-ex2_FS-45v.24892.24892.3.0.dta	3	1621.88	0.615271	0.508797	-0.001501	-0.92547	1	0.000663776
299	FVVEKAEQQK(5)-AQFLVEKAK(7)	2376.32	null	NP_002625 GeneID:5245 PHB(202)-NP_001138303 GeneID:11331 PHB2(216)/NP_001268425 GeneID:5245 PHB(202)-NP_001138303 GeneID:11331 PHB2(216)/NP_001268644 GeneID:5245 PHB(202)-NP_001138303 GeneID:11331 PHB2(216)/	Inter-Protein							NP_001138303	GeneID:11331	PHB2(216)	NP_002625	GeneID:5245	PHB(202)
	1	mice-tumour-7-F17-3-ex2_FS-45v.15345.15345.3.0.dta	3	2376.31	7.21528e-07	0.0297386	-0.005005	-2.1062	4.51605e-10	4.64509e-07
	2	mice-tumour-7-F17-1-ex2_FS-45v.15332.15332.3.0.dta	3	2376.31	5.55667e-06	0.0897313	-0.005694	-2.39615	9.07688e-09	1.27895e-05
	3	mice-tumour-7-F17-1-ex2_FS-45v.15385.15385.3.0.dta	3	2376.31	3.9861e-05	0.105882	-0.005694	-2.39615	4.50032e-14	6.05778e-06
	4	mice-tumour-7-F16-2-ex2_FS-45v.14767.14767.3.0.dta	3	2376.31	5.0634e-05	0.250667	-0.009002	-3.78822	5.16479e-07	4.66581e-06
	5	mice-tumour-7-F16-2-ex2_FS-45v.14695.14695.3.0.dta	3	2376.31	0.000238712	0.347313	-0.008655	-3.64219	3.49036e-08	2.29583e-05
	6	mice-tumour-7-F16-1-ex2_FS-45v.14773.14773.3.0.dta	3	2376.31	1.73257e-05	0.427567	-0.007694	-3.23778	5.94081e-16	2.13802e-05
300	FVVPKPR(5)-KLGLTQ(1)	1638.99	null	NP_998776 GeneID:5250 SLC25A3(251)-NP_998776 GeneID:5250 SLC25A3(356)/NP_998776 GeneID:5250 SLC25A3(251)-NP_002626 GeneID:5250 SLC25A3(356)/NP_998776 GeneID:5250 SLC25A3(251)-NP_005879 GeneID:5250 SLC25A3(357)/NP_002626 GeneID:5250 SLC25A3(251)-NP_998776 GeneID:5250 SLC25A3(356)/NP_002626 GeneID:5250 SLC25A3(251)-NP_002626 GeneID:5250 SLC25A3(356)/NP_002626 GeneID:5250 SLC25A3(251)-NP_005879 Gene…	Intra-Protein							NP_005879	GeneID:5250	SLC25A3(252)	NP_005879	GeneID:5250	SLC25A3(357)
	1	mice-tumour-7-F7-3-ex2_FS-65v.22043.22043.3.0.dta	3	1638.99	0.0225834	0.134052	-0.001967	-1.20013	0.00435806	0.0368344
	2	mice-tumour-7-F7-2-ex2_FS-65v.21898.21898.3.0.dta	3	1638.99	0.0244117	0.254279	-0.001771	-1.08054	0.0147104	0.0930584
301	GAAVNLTLVTPEKAIK(13)-ADKQISLPAK(3)	2874.65	Acetyl[ProteinN-term](19)	NP_001177990 GeneID:79751 SLC25A22(80)-NP_001177990 GeneID:79751 SLC25A22(4)/NP_001177990 GeneID:79751 SLC25A22(80)-NP_001177989 GeneID:79751 SLC25A22(4)/NP_001177990 GeneID:79751 SLC25A22(80)-NP_078974 GeneID:79751 SLC25A22(4)/NP_001177989 GeneID:79751 SLC25A22(80)-NP_001177990 GeneID:79751 SLC25A22(4)/NP_001177989 GeneID:79751 SLC25A22(80)-NP_001177989 GeneID:79751 SLC25A22(4)/NP_001177989 Gene…	Intra-Protein							NP_001177990	GeneID:79751	SLC25A22(80)	NP_001177990	GeneID:79751	SLC25A22(4)
												NP_113669	GeneID:83733	SLC25A18(79)	NP_001177990	GeneID:79751	SLC25A22(4)
	1	mice-tumour-7-F12-1-ex2_FS-45v.26628.26628.3.0.dta	3	2874.65	0.0447582	0.0036906	-0.001928	-0.670689	0.110615	0.000158153
	2	mice-tumour-7-F12-3-ex2_FS-45V.26330.26330.3.0.dta	3	2874.65	0.0670594	0.210521	-0.002543	-0.884628	0.00833828	0.0225253
302	GASIVEDKLVEDLR(8)-ESEEQKR(6)	2586.33	null	NP_005262 GeneID:2746 GLUD1(84)-NP_005262 GeneID:2746 GLUD1(98)/	Intra-Protein							NP_005262	GeneID:2746	GLUD1(84)	NP_005262	GeneID:2746	GLUD1(98)
	1	mice-tumour-7-F1-1-ex2_FS-45.19979.19979.3.0.dta	3	2586.32	0.368945	0.128906	-0.00301	-1.16381	8.88379e-12	0.179912
303	GASLKSPLPSQ(5)-KQENALKPK(7)	2277.28	null	NP_851823 GeneID:122704 MRPL52(58)-NP_851823 GeneID:122704 MRPL52(51)/NP_851823 GeneID:122704 MRPL52(58)-NP_851821 GeneID:122704 MRPL52(51)/NP_851823 GeneID:122704 MRPL52(58)-NP_851822 GeneID:122704 MRPL52(51)/NP_851823 GeneID:122704 MRPL52(58)-NP_848026 GeneID:122704 MRPL52(110)/NP_851823 GeneID:122704 MRPL52(58)-NP_851313 GeneID:122704 MRPL52(109)/NP_851821 GeneID:122704 MRPL52(58)-NP_851823 Ge…	Intra-Protein							NP_851823	GeneID:122704	MRPL52(58)	NP_851823	GeneID:122704	MRPL52(51)
	1	mice-tumour-7-F3-2-ex2_20230117033445_FS-45v.11299.11299.3.0.dta	3	2277.28	0.454717	0.352261	-0.001089	-0.478202	0.013711	0.379501
304	GDFCIEVGKNLIHGSDSVESAR(9)-TFLAVKPDGVQR(6)	3857.95	Carbamidomethyl[C](4)	NP_002504 GeneID:4832 NME3(131)-NP_002504 GeneID:4832 NME3(29)/	Intra-Protein							NP_002504	GeneID:4832	NME3(131)	NP_002504	GeneID:4832	NME3(29)
	1	mice-tumour-7-F18-3-ex2_FS-45v.24325.24325.4.0.dta	4	3857.96	3.03603e-09	3.32019e-12	0.011972	3.1032	3.82396e-10	3.26153e-07
	2	mice-tumour-7-F18-2-ex2_FS-45v.24296.24296.4.0.dta	4	3857.96	1.70887e-07	0.00242006	0.011884	3.08039	6.61931e-10	7.90012e-07
	3	mice-tumour-7-F18-1-ex2_FS-45v.24369.24369.4.0.dta	4	3857.96	1.20176e-08	0.0793866	0.014805	3.83753	2.64416e-08	2.25971e-08
305	GDKAQIEK(3)-KGVITVK(1)	1770.04	null	NP_002147 GeneID:3329 HSPD1(364)-NP_002147 GeneID:3329 HSPD1(196)/NP_002147 GeneID:3329 HSPD1(364)-NP_955472 GeneID:3329 HSPD1(196)/NP_955472 GeneID:3329 HSPD1(364)-NP_002147 GeneID:3329 HSPD1(196)/NP_955472 GeneID:3329 HSPD1(364)-NP_955472 GeneID:3329 HSPD1(196)/	Intra-Protein							NP_002147	GeneID:3329	HSPD1(364)	NP_002147	GeneID:3329	HSPD1(196)
	1	mice-tumour-7-F8-2-ex2_FS45V.6957.6957.4.0.dta	4	1770.03	1.3144e-06	2.96505e-07	-0.00358	-2.02256	3.1241e-06	2.75562e-06
	2	mice-tumour-7-F8-2-ex2_FS45V.6968.6968.4.0.dta	4	1770.03	6.09743e-07	8.09944e-07	-0.00358	-2.02256	0.000100381	1.8507e-06
	3	mice-tumour-7-F8-3-ex2_FS-45v.7206.7206.4.2.dta	4	1770.03	0.000120992	1.07467e-05	-0.003781	-2.13611	6.19226e-05	4.15448e-06
	4	mice-tumour-7-F8-1-ex2_FS-45V.7065.7065.4.1.dta	4	1770.03	0.00036533	0.0085877	-0.005009	-2.82988	5.86424e-05	3.69901e-05
306	GDKDGSLEVTGQLGEVMK(3)-RPQDKDAK(5)	2957.49	null	NP_004784 GeneID:9361 LONP1(796)-NP_004784 GeneID:9361 LONP1(790)/NP_004784 GeneID:9361 LONP1(796)-NP_001263409 GeneID:9361 LONP1(594)/NP_004784 GeneID:9361 LONP1(796)-NP_001263408 GeneID:9361 LONP1(726)/NP_001263409 GeneID:9361 LONP1(600)-NP_004784 GeneID:9361 LONP1(790)/NP_001263409 GeneID:9361 LONP1(600)-NP_001263409 GeneID:9361 LONP1(594)/NP_001263409 GeneID:9361 LONP1(600)-NP_001263408 GeneI…	Intra-Protein							NP_004784	GeneID:9361	LONP1(796)	NP_004784	GeneID:9361	LONP1(790)
	1	mice-tumour-7-F18-1-ex2_FS-45v.13541.13541.3.0.dta	3	2957.49	0.107095	0.200534	-0.002704	-0.914289	0.000487758	0.11618
	2	mice-tumour-7-F18-2-ex2_FS-45v.13529.13529.3.0.dta	3	2957.49	0.909056	0.325782	0.005103	1.72545	1	1
307	GDVEKGK(5)-KIFIMK(1)	1690.94	Acetyl[ProteinN-term](0)	NP_061820 GeneID:54205 CYCS(6)-NP_061820 GeneID:54205 CYCS(9)/	Intra-Protein							NP_061820	GeneID:54205	CYCS(6)	NP_061820	GeneID:54205	CYCS(9)
	1	mice-tumour-7-F14-2-ex2_FS-65V.17708.17708.3.0.dta	3	1690.95	2.1181e-11	7.05803e-09	0.001805	1.06745	3.62194e-11	8.31676e-12
	2	mice-tumour-7-F14-2-ex2_FS-65V.17731.17731.3.0.dta	3	1690.95	3.92194e-11	7.08157e-07	0.001709	1.01068	2.94647e-13	2.7089e-10
	3	mice-tumour-7-F14-2-ex2_FS-65V.17811.17811.3.0.dta	3	1690.95	2.04223e-06	9.20642e-06	0.001742	1.03019	1.36605e-06	2.67417e-09
	4	mice-tumour-7-F13-3-ex2_FS-65V.17479.17479.3.0.dta	3	1690.94	1.10107e-08	1.13839e-05	-0.00123	-0.727404	1.96166e-09	3.86482e-11
	5	mice-tumour-7-F14-3-ex2_FS-65V.17650.17650.3.0.dta	3	1690.95	1.15217e-07	0.000138251	0.001194	0.706114	6.94737e-09	3.40327e-07
	6	mice-tumour-7-F14-3-ex2_FS-65V.17679.17679.3.0.dta	3	1690.95	2.3032e-08	0.000562324	0.001194	0.706114	9.62516e-08	1.14012e-09
	7	mice-tumour-7-F14-1-ex2_FS-65V.17837.17837.3.0.dta	3	1690.95	1.74785e-05	0.0017885	0.002002	1.18395	5.39845e-06	4.5468e-07
	8	mice-tumour-7-F14-1-ex2_FS-65V.17755.17755.3.0.dta	3	1690.95	1.53946e-07	0.00247366	0.001703	1.00713	4.06397e-08	8.49977e-08
	9	mice-tumour-7-F13-1-ex2_FS-65V.17564.17564.3.0.dta	3	1690.94	0.000226792	0.00297237	-0.002443	-1.44475	0.00013753	2.03653e-06
	10	mice-tumour-7-F13-2-ex2_FS-65V.17480.17480.3.0.dta	3	1690.94	9.68934e-05	0.00969723	-0.001676	-0.991162	0.0011505	1.85832e-06
308	GEYVVAKLDDLVNWAR(7)-AVAPKPSSR(5)	2897.55	null	NP_077718 GeneID:374291 NDUFS7(66)-NP_077718 GeneID:374291 NDUFS7(55)/	Intra-Protein							NP_077718	GeneID:374291	NDUFS7(66)	NP_077718	GeneID:374291	NDUFS7(55)
	1	mice-tumour-7-F16-3-ex2_FS-45v.28691.28691.3.0.dta	3	2897.55	4.16952e-13	1.77192e-09	-0.000456	-0.157374	9.03106e-12	8.75644e-08
	2	mice-tumour-7-F16-1-ex2_FS-45v.28579.28579.3.0.dta	3	2897.54	6.6543e-07	0.00222296	-0.007525	-2.59702	5.2745e-17	2.84675e-08
	3	mice-tumour-7-F16-2-ex2_FS-45v.28611.28611.4.0.dta	4	2897.56	0.0036475	0.00796738	0.004225	1.45813	2.65008e-12	0.0119212
309	GFSIPECQKLLPK(9)-LPCVAAKIYR(7)	2844.55	Carbamidomethyl[C](7);Carbamidomethyl[C](19)	NP_004068 GeneID:1431 CS(103)-NP_004068 GeneID:1431 CS(215)/	Intra-Protein							NP_004068	GeneID:1431	CS(103)	NP_004068	GeneID:1431	CS(215)
	1	mice-tumour-7-F12-3-ex2_FS-65V.26710.26710.4.2.dta	4	2844.54	0.219452	0.604498	-0.010107	-3.55311	0.0216331	0.534863
310	GGEIQPVSVKVGDK(10)-DGDILGKYVD(7)	2644.37	null	NP_002148 GeneID:3336 HSPE1(66)-NP_002148 GeneID:3336 HSPE1(99)/	Intra-Protein							NP_002148	GeneID:3336	HSPE1(66)	NP_002148	GeneID:3336	HSPE1(99)
	1	mice-tumour-7-F20-3-ex2_FS-45v.24191.24191.3.0.dta	3	2644.37	0.000591964	2.00673e-05	-0.001239	-0.468542	0.000548549	8.44461e-05
	2	mice-tumour-7-F20-3-ex2_FS-45v.24220.24220.3.0.dta	3	2644.37	0.0011187	5.28807e-05	-0.001387	-0.52451	1.04125e-05	0.00102376
	3	mice-tumour-7-F20-2-ex2_FS-45v.24134.24134.3.0.dta	3	2644.37	4.27683e-05	0.00019288	-0.004403	-1.66505	7.6159e-05	2.5927e-05
	4	mice-tumour-7-F19-1-ex2_FS-45v.24331.24331.3.1.dta	3	2644.35	0.00922545	0.00288305	-0.021082	-7.97241	0.00712077	0.00100572
	5	mice-tumour-7-F19-3-ex2_FS-45v.24333.24333.3.0.dta	3	2644.37	0.0236697	0.00486738	-0.005981	-2.26179	0.0709271	1.45569e-05
	6	mice-tumour-7-F20-1-ex2_FS-45v.24234.24234.3.0.dta	3	2644.37	0.00011192	0.01631	-0.00278	-1.05129	0.000366783	3.37355e-05
	7	mice-tumour-7-F19-1-ex2_FS-45v.24358.24358.3.0.dta	3	2644.35	0.00323632	0.037959	-0.018651	-7.05309	0.00514032	0.000802286
	8	mice-tumour-7-F19-2-ex2_FS-45v.24335.24335.3.0.dta	3	2644.36	9.1463e-05	0.0620253	-0.00983	-3.71733	0.00126637	3.33236e-05
	9	mice-tumour-7-F19-3-ex2_FS-45v.24254.24254.3.1.dta	3	2644.35	0.14481	0.238716	-0.019018	-7.19188	0.0523394	0.237896
311	GGEIQPVSVKVGDK(10)-GKGGEIQPVSVK(2)	2748.51	null	NP_002148 GeneID:3336 HSPE1(66)-NP_002148 GeneID:3336 HSPE1(56)/	Intra-Protein							NP_002148	GeneID:3336	HSPE1(66)	NP_002148	GeneID:3336	HSPE1(56)
	1	mice-tumour-7-F12-1-ex2_FS-45v.14123.14123.3.0.dta	3	2748.51	0.244332	0.00177762	-0.004617	-1.67982	0.184114	0.000600563
	2	mice-tumour-7-F12-2-ex2_FS-65v.15436.15436.4.0.dta	4	2748.5	0.0093074	0.0249431	-0.012148	-4.41984	0.00745678	0.00566774
	3	mice-tumour-7-F12-1-ex2_FS-65v.15506.15506.4.1.dta	4	2748.5	0.745511	0.0926718	-0.009942	-3.61723	1	0.111558
	4	mice-tumour-7-F12-3-ex2_FS-65V.15160.15160.4.0.dta	4	2748.5	0.106574	0.468803	-0.011451	-4.16625	0.062741	0.107962
312	GGEIQPVSVKVGDK(10)-KFLPLFDR(1)	2585.43	null	NP_002148 GeneID:3336 HSPE1(66)-NP_002148 GeneID:3336 HSPE1(8)/	Intra-Protein							NP_002148	GeneID:3336	HSPE1(66)	NP_002148	GeneID:3336	HSPE1(8)
	1	mice-tumour-7-F16-2-ex2_FS-65v.26286.26286.4.0.dta	4	2585.43	5.04071e-06	7.55485e-05	-0.005054	-1.9548	2.95389e-06	1.00776e-10
	2	mice-tumour-7-F16-2-ex2_FS-65v.26264.26264.4.0.dta	4	2585.43	0.00033714	0.000105727	-0.004889	-1.89098	0.000122288	1.86676e-08
	3	mice-tumour-7-F16-3-ex2_FS-65v.26155.26155.4.0.dta	4	2585.43	1.58236e-05	0.000863623	-0.003597	-1.39126	1.33495e-05	9.01976e-11
	4	mice-tumour-7-F16-3-ex2_FS-65v.26177.26177.4.0.dta	4	2585.43	5.19501e-05	0.00145544	-0.003639	-1.4075	3.17073e-05	1.16364e-10
	5	mice-tumour-7-F16-1-ex2_FS-65v.26342.26342.4.0.dta	4	2585.43	2.03719e-05	0.00256571	-0.004079	-1.57769	4.67607e-06	8.77521e-10
	6	mice-tumour-7-F16-1-ex2_FS-65v.26363.26363.4.0.dta	4	2585.43	7.04518e-06	0.00530656	-0.004079	-1.57769	1.72617e-05	1.64835e-08
313	GGKIGLFGGAGVGK(3)-GPIKTK(4)	1998.17	null	NP_001677 GeneID:506 ATP5F1B(201)-NP_001677 GeneID:506 ATP5F1B(159)/	Intra-Protein							NP_001677	GeneID:506	ATP5F1B(201)	NP_001677	GeneID:506	ATP5F1B(159)
	1	mice-tumour-7-F6-3-ex2_FS-65v.16867.16867.4.2.dta	4	1998.17	0.0261886	6.0856e-05	-0.00142	-0.710649	0.000227052	0.0760978
314	GGLGLSGAKANYR(9)-KFVSGQK(1)	2194.2	null	NP_003357 GeneID:7385 UQCRC2(250)-NP_003357 GeneID:7385 UQCRC2(430)/	Intra-Protein							NP_003357	GeneID:7385	UQCRC2(250)	NP_003357	GeneID:7385	UQCRC2(430)
	1	mice-tumour-7-F2-1-ex2_FS-45V.11268.11268.3.0.dta	3	2194.2	4.77509e-06	0.00478973	-0.001751	-0.798014	5.50489e-05	2.26527e-10
	2	mice-tumour-7-F2-2-ex2-_FS-45v.11247.11247.4.1.dta	4	2194.2	0.000978196	0.0344822	0.003951	1.80066	0.000426071	0.00191804
	3	mice-tumour-7-F2-3-ex2_FS-45V.11337.11337.4.2.dta	4	2194.21	0.00111725	0.0375196	0.008713	3.97093	0.000242898	0.000261045
	4	mice-tumour-7-F2-2-ex2-_FS-45v.11213.11213.3.0.dta	3	2194.19	2.1648e-06	0.0835088	-0.002876	-1.31073	0.000749582	1.18642e-10
315	GIDLTQVKGTGPDGR(8)-KDIDSFVPSK(1)	2786.46	null	NP_001922 GeneID:1737 DLAT(376)-NP_001922 GeneID:1737 DLAT(387)/	Intra-Protein							NP_001922	GeneID:1737	DLAT(376)	NP_001922	GeneID:1737	DLAT(387)
	1	mice-tumour-7-F16-3-ex2_FS-45v.20824.20824.3.0.dta	3	2786.46	0.000113663	0.00171775	0.007025	2.52112	1.45885e-05	3.96903e-05
	2	mice-tumour-7-F16-3-ex2_FS-45v.20856.20856.3.0.dta	3	2786.46	0.0135605	0.023176	0.007025	2.52112	0.000177789	0.0134008
	3	mice-tumour-7-F16-2-ex2_FS-45v.20804.20804.3.1.dta	3	2786.46	0.0235967	0.0556881	0.005503	1.97491	0.00109344	0.00736967
	4	mice-tumour-7-F16-1-ex2_FS-45v.20811.20811.3.1.dta	3	2786.47	0.00541978	0.0721957	0.009031	3.24103	0.000100829	0.000856663
316	GIIDPTKVVR(7)-IGIEIIKR(7)	2176.34	null	NP_002147 GeneID:3329 HSPD1(523)-NP_002147 GeneID:3329 HSPD1(469)/NP_002147 GeneID:3329 HSPD1(523)-NP_955472 GeneID:3329 HSPD1(469)/NP_955472 GeneID:3329 HSPD1(523)-NP_002147 GeneID:3329 HSPD1(469)/NP_955472 GeneID:3329 HSPD1(523)-NP_955472 GeneID:3329 HSPD1(469)/	Intra-Protein							NP_002147	GeneID:3329	HSPD1(523)	NP_002147	GeneID:3329	HSPD1(469)
	1	mice-tumour-7-F12-2-ex2_FS-65v.25907.25907.4.0.dta	4	2176.34	2.95506e-07	0.0356708	-0.005429	-2.49455	1.10879e-05	0.000145359
	2	mice-tumour-7-F12-3-ex2_FS-65V.25627.25627.4.0.dta	4	2176.34	0.00826528	0.341475	-0.004657	-2.13983	8.08282e-05	0.000539143
	3	mice-tumour-7-F12-1-ex2_FS-65v.26079.26079.4.0.dta	4	2176.34	0.000247226	0.375969	-0.002738	-1.25807	0.000718705	0.00050378
317	GIIDPTKVVR(7)-KGVITVK(1)	1979.23	null	NP_002147 GeneID:3329 HSPD1(523)-NP_002147 GeneID:3329 HSPD1(196)/NP_002147 GeneID:3329 HSPD1(523)-NP_955472 GeneID:3329 HSPD1(196)/NP_955472 GeneID:3329 HSPD1(523)-NP_002147 GeneID:3329 HSPD1(196)/NP_955472 GeneID:3329 HSPD1(523)-NP_955472 GeneID:3329 HSPD1(196)/	Intra-Protein							NP_002147	GeneID:3329	HSPD1(523)	NP_002147	GeneID:3329	HSPD1(196)
	1	mice-tumour-7-F6-3-ex2_FS-45v.17602.17602.4.0.dta	4	1979.22	2.20766e-05	0.0155135	-0.00264	-1.33386	2.20831e-06	4.93863e-05
	2	mice-tumour-7-F6-2-ex2_FS-45v.17543.17543.4.0.dta	4	1979.22	4.9453e-07	0.123986	-0.002811	-1.42025	9.11235e-08	2.5885e-07
	3	mice-tumour-7-F6-1-ex2_FS-45v.17536.17536.4.0.dta	4	1979.22	0.00117373	0.1827	-0.003218	-1.62589	0.00217073	0.00387139
318	GKEDLDKWTVTSDK(2)-SEVFLKMGK(6)	2797.43	null	NP_057097 GeneID:51103 NDUFAF1(130)-NP_057097 GeneID:51103 NDUFAF1(153)/	Intra-Protein							NP_057097	GeneID:51103	NDUFAF1(130)	NP_057097	GeneID:51103	NDUFAF1(153)
	1	mice-tumour-7-F18-1-ex2_FS-65v.20556.20556.4.0.dta	4	2797.43	1.03912e-05	1.35986e-08	0.000409	0.146205	4.85846e-08	1.3324e-05
	2	mice-tumour-7-F18-2-ex2_FS-65v.20417.20417.4.0.dta	4	2797.43	1.05819e-07	0.000219491	-0.004949	-1.76912	1.08976e-06	1.18506e-05
	3	mice-tumour-7-F18-3-ex2_FS-65v.20490.20490.4.0.dta	4	2797.44	0.000358565	0.000309981	0.005413	1.93499	7.79668e-11	8.30519e-05
	4	mice-tumour-7-F18-2-ex2_FS-65v.20449.20449.5.2.dta	5	2797.42	0.0302432	0.0263411	-0.012208	-4.364	0.0276101	0.00434739
319	GKFAIRPDK(2)-KSNPIIR(1)	1996.17	null	NP_001123291 GeneID:1727 CYB5R3(133)-NP_001123291 GeneID:1727 CYB5R3(141)/NP_001123291 GeneID:1727 CYB5R3(133)-NP_000389 GeneID:1727 CYB5R3(164)/NP_001123291 GeneID:1727 CYB5R3(133)-NP_001165131 GeneID:1727 CYB5R3(197)/NP_001123291 GeneID:1727 CYB5R3(133)-NP_001165132 GeneID:1727 CYB5R3(141)/NP_001123291 GeneID:1727 CYB5R3(133)-NP_015565 GeneID:1727 CYB5R3(141)/NP_000389 GeneID:1727 CYB5R3(156)-N…	Intra-Protein							NP_001123291	GeneID:1727	CYB5R3(133)	NP_001123291	GeneID:1727	CYB5R3(141)
	1	mice-tumour-7-F2-3-ex2_FS-45V.11284.11284.5.2.dta	5	1996.17	0.00230991	0.000139858	-0.003136	-1.57101	0.0132292	0.0110202
	2	mice-tumour-7-F2-1-ex2_FS-45V.11225.11225.5.0.dta	5	1996.17	0.0242263	0.00680554	-0.003315	-1.66068	0.0167255	0.0563941
	3	mice-tumour-7-F2-3-ex2_FS-45V.11260.11260.5.2.dta	5	1996.17	0.397424	0.0105119	-0.003136	-1.57101	1	0.116528
	4	mice-tumour-7-F2-1-ex2_FS-45V.11278.11278.5.1.dta	5	1996.17	1	0.212437	-0.003188	-1.59706	1	0.229172
320	GKFLINLEGGDIREESSYK(2)-ENDPKR(5)	3050.54	null	NP_060530 GeneID:55699 IARS2(959)-NP_060530 GeneID:55699 IARS2(815)/	Intra-Protein							NP_060530	GeneID:55699	IARS2(959)	NP_060530	GeneID:55699	IARS2(815)
	1	mice-tumour-7-F19-3-ex2_FS-45v.27741.27741.4.2.dta	4	3050.55	1	0.314114	0.003751	1.22962	0.0351303	1
321	GKGDKAQIEK(5)-KGVITVK(1)	1955.15	null	NP_002147 GeneID:3329 HSPD1(364)-NP_002147 GeneID:3329 HSPD1(196)/NP_002147 GeneID:3329 HSPD1(364)-NP_955472 GeneID:3329 HSPD1(196)/NP_955472 GeneID:3329 HSPD1(364)-NP_002147 GeneID:3329 HSPD1(196)/NP_955472 GeneID:3329 HSPD1(364)-NP_955472 GeneID:3329 HSPD1(196)/	Intra-Protein							NP_002147	GeneID:3329	HSPD1(364)	NP_002147	GeneID:3329	HSPD1(196)
	1	mice-tumour-7-F6-3-ex2_FS-45v.5211.5211.4.0.dta	4	1955.15	0.000213542	0.000527734	-0.002091	-1.06948	6.24044e-06	7.30444e-07
	2	mice-tumour-7-F6-1-ex2_FS-45v.5249.5249.4.0.dta	4	1955.15	0.00180405	0.00963482	-0.005124	-2.62077	0.000182018	7.2606e-07
	3	mice-tumour-7-F6-2-ex2_FS-45v.5251.5251.4.0.dta	4	1955.15	9.28968e-05	0.0427568	-0.000659	-0.337058	2.04435e-06	1.97122e-06
322	GKGGEIQPVSVK(2)-DGDILGKYVD(7)	2430.28	null	NP_002148 GeneID:3336 HSPE1(56)-NP_002148 GeneID:3336 HSPE1(99)/	Intra-Protein							NP_002148	GeneID:3336	HSPE1(56)	NP_002148	GeneID:3336	HSPE1(99)
	1	mice-tumour-7-F19-1-ex2_FS-65v.22955.22955.3.0.dta	3	2430.27	4.29858e-05	0.000112433	-0.004303	-1.77058	0.00255004	1.85714e-06
	2	mice-tumour-7-F19-2-ex2_FS-65v.22902.22902.3.0.dta	3	2430.27	0.014759	0.00161898	-0.006677	-2.74742	0.0004655	0.0186549
	3	mice-tumour-7-F19-3-ex2_FS-65v.22933.22933.3.0.dta	3	2430.27	0.00201063	0.00520607	-0.006926	-2.84988	4.49642e-07	0.00174575
323	GKGGEIQPVSVK(2)-GKGGEIQPVSVK(2)	2534.42	null	NP_002148 GeneID:3336 HSPE1(56)-NP_002148 GeneID:3336 HSPE1(56)/	Inter-Protein							NP_002148	GeneID:3336	HSPE1(56)	NP_002148	GeneID:3336	HSPE1(56)
	1	mice-tumour-7-F9-1-ex2_FS-65v.13157.13157.4.0.dta	4	2534.42	0.642687	0.0146136	-0.001621	-0.639594	0.456614	0.763709
	2	mice-tumour-7-F7-2-ex2_FS-65v.12959.12959.4.0.dta	4	2534.42	0.735371	0.0196977	-0.00286	-1.12846	0.444527	0.872837
	3	mice-tumour-7-F7-2-ex2_FS-65v.12974.12974.3.0.dta	3	2534.41	0.0393095	0.0507428	-0.004713	-1.8596	0.0848016	0.0183364
	4	mice-tumour-7-F8-2-ex2_FS65V.12697.12697.3.0.dta	3	2534.41	0.00886252	0.0600946	-0.00403	-1.59011	0.00502552	0.016008
	5	mice-tumour-7-F7-3-ex2_FS-65v.13187.13187.4.0.dta	4	2534.41	0.13408	0.174055	-0.004442	-1.75267	0.03881	0.105052
	6	mice-tumour-7-F6-1-ex2_FS-65v.13338.13338.3.0.dta	3	2534.41	1	0.20186	-0.011707	-4.61921	1	1
	7	mice-tumour-7-F9-3-ex2_FS-65v.13152.13152.4.0.dta	4	2534.42	1	0.277171	-0.003248	-1.28156	1	1
	8	mice-tumour-7-F8-1-ex2_FS-65V.12891.12891.4.0.dta	4	2534.42	0.54022	0.311723	-0.002975	-1.17384	0.603092	0.820421
	9	mice-tumour-7-F6-2-ex2_FS-65v.13323.13323.4.1.dta	4	2534.41	1	0.374594	-0.007832	-3.09025	1	0.858274
	10	mice-tumour-7-F8-1-ex2_FS-65V.12809.12809.3.0.dta	3	2534.41	0.276784	0.392956	-0.004165	-1.64338	0.0758839	0.654324
	11	mice-tumour-7-F8-2-ex2_FS65V.12694.12694.4.0.dta	4	2534.41	1	0.398068	-0.005216	-2.05807	0.498856	1
	12	mice-tumour-7-F6-1-ex2_FS-65v.13332.13332.3.0.dta	3	2534.41	1	0.42906	-0.011707	-4.61921	1	1
324	GKGGEIQPVSVK(2)-KFLPLFDR(1)	2371.34	null	NP_002148 GeneID:3336 HSPE1(56)-NP_002148 GeneID:3336 HSPE1(8)/	Intra-Protein							NP_002148	GeneID:3336	HSPE1(56)	NP_002148	GeneID:3336	HSPE1(8)
	1	mice-tumour-7-F14-2-ex2_FS-65V.24129.24129.4.4.dta	4	2371.34	1	0.0385102	0.000793	0.33441	1	0.0113966
	2	mice-tumour-7-F17-3-ex2_FS-65v.22965.22965.4.0.dta	4	2371.33	0.00274126	0.0396042	-0.005329	-2.24725	0.00216643	1.77531e-06
	3	mice-tumour-7-F14-3-ex2_FS-65V.24078.24078.3.0.dta	3	2371.33	0.0107748	0.145729	-0.009965	-4.20227	0.749927	0.00539609
	4	mice-tumour-7-F14-2-ex2_FS-65V.24112.24112.3.0.dta	3	2371.34	0.680153	0.294117	-0.002427	-1.02347	1	0.0043672
325	GKGVFNSGLK(2)-LNAKEIVLK(4)	2171.28	null	NP_001171070 GeneID:8801 SUCLG2(93)-NP_001171070 GeneID:8801 SUCLG2(78)/NP_001171070 GeneID:8801 SUCLG2(93)-NP_003839 GeneID:8801 SUCLG2(78)/NP_003839 GeneID:8801 SUCLG2(93)-NP_001171070 GeneID:8801 SUCLG2(78)/NP_003839 GeneID:8801 SUCLG2(93)-NP_003839 GeneID:8801 SUCLG2(78)/	Intra-Protein							NP_003839	GeneID:8801	SUCLG2(93)	NP_003839	GeneID:8801	SUCLG2(78)
	1	mice-tumour-7-F11-1-ex2_FS-65v.20975.20975.4.1.dta	4	2171.28	0.000173043	0.000130952	-0.002068	-0.952434	1.0958e-05	2.03786e-05
	2	mice-tumour-7-F11-2-ex2_FS-65v.20947.20947.4.1.dta	4	2171.28	0.0984617	0.0193019	-0.003316	-1.52721	0.0162834	0.133083
	3	mice-tumour-7-F11-3-ex2_FS-65v.20786.20786.4.3.dta	4	2171.28	0.172775	0.0590709	-0.004708	-2.16831	0.00435126	0.182148
326	GLDPYNVLAPKGASGTR(11)-CGAHYKLVPQQLAH(6)	3474.79	Carbamidomethyl[C](21)	NP_001853 GeneID:1329 COX5B(68)-NP_001853 GeneID:1329 COX5B(121)/	Intra-Protein							NP_001853	GeneID:1329	COX5B(68)	NP_001853	GeneID:1329	COX5B(121)
	1	mice-tumour-7-F12-1-ex2_FS-45v.21608.21608.5.1.dta	5	3474.78	0.0234642	0.00875168	-0.010563	-3.03989	0.0256641	0.0565587
327	GLDPYNVLAPKGASGTR(11)-EDPNLVPSISNKR(12)	3321.74	null	NP_001853 GeneID:1329 COX5B(68)-NP_001853 GeneID:1329 COX5B(86)/	Intra-Protein							NP_001853	GeneID:1329	COX5B(68)	NP_001853	GeneID:1329	COX5B(86)
	1	mice-tumour-7-F12-1-ex2_FS-45v.23526.23526.4.1.dta	4	3321.73	0.00411743	0.0175387	-0.009002	-2.71002	1.39034e-05	0.00751342
	2	mice-tumour-7-F12-1-ex2_FS-45v.23540.23540.3.0.dta	3	3321.74	0.195092	0.021572	-3e-05	-0.009031	0.221458	0.00139083
	3	mice-tumour-7-F12-3-ex2_FS-45V.23129.23129.4.1.dta	4	3321.74	0.0217115	0.0989274	-0.006672	-2.00858	0.000165906	0.0313952
328	GLDPYNVLAPKGASGTR(11)-EIMLAAKK(7)	2756.5	null	NP_001853 GeneID:1329 COX5B(68)-NP_001853 GeneID:1329 COX5B(56)/	Intra-Protein							NP_001853	GeneID:1329	COX5B(68)	NP_001853	GeneID:1329	COX5B(56)
	1	mice-tumour-7-F12-2-ex2_FS-45v.22649.22649.4.0.dta	4	2756.49	4.01107e-05	0.00832147	-0.009498	-3.44567	2.38959e-10	0.00102985
	2	mice-tumour-7-F13-1-ex2_FS-45V.22790.22790.4.1.dta	4	2756.5	0.00758491	0.233746	-0.003496	-1.26827	9.41987e-08	0.00652685
	3	mice-tumour-7-F12-3-ex2_FS-45V.22264.22264.4.0.dta	4	2756.49	0.00058086	0.237465	-0.006984	-2.53365	2.39673e-07	0.0194608
	4	mice-tumour-7-F13-2-ex2_FS-45V.22697.22697.4.0.dta	4	2756.5	0.123869	0.367421	-0.004788	-1.73698	1.01653e-07	0.247378
	5	mice-tumour-7-F13-3-ex2_FS-45V.22785.22785.4.1.dta	4	2756.5	0.387537	0.570664	-0.003002	-1.08906	1.32023e-06	0.837741
329	GLDWVKEEAPDILCLQETK(6)-AWIKKK(4)	3154.69	Carbamidomethyl[C](14)	NP_542380 GeneID:328 APEX1(85)-NP_542380 GeneID:328 APEX1(77)/NP_542380 GeneID:328 APEX1(85)-NP_542379 GeneID:328 APEX1(77)/NP_542380 GeneID:328 APEX1(85)-NP_001632 GeneID:328 APEX1(77)/NP_542380 GeneID:328 APEX1(85)-NP_001231178 GeneID:328 APEX1(77)/NP_542379 GeneID:328 APEX1(85)-NP_542380 GeneID:328 APEX1(77)/NP_542379 GeneID:328 APEX1(85)-NP_542379 GeneID:328 APEX1(77)/NP_542379 GeneID:328 APE…	Intra-Protein							NP_542380	GeneID:328	APEX1(85)	NP_542380	GeneID:328	APEX1(77)
	1	mice-tumour-7-F19-2-ex2_FS-65v.26438.26438.4.0.dta	4	3154.68	1	0.0467903	-0.010515	-3.33314	1	1
	2	mice-tumour-7-F19-3-ex2_FS-65v.26464.26464.4.2.dta	4	3154.68	1	0.13601	-0.00187	-0.592769	1	1
330	GLDWVKEEAPDILCLQETK(6)-KGKAKN(1)	3026.59	Carbamidomethyl[C](14)	NP_542380 GeneID:328 APEX1(85)-NP_079272 GeneID:85476 GFM1(746)/NP_542379 GeneID:328 APEX1(85)-NP_079272 GeneID:85476 GFM1(746)/NP_001632 GeneID:328 APEX1(85)-NP_079272 GeneID:85476 GFM1(746)/NP_001231178 GeneID:328 APEX1(85)-NP_079272 GeneID:85476 GFM1(746)/	Inter-Protein							NP_542380	GeneID:328	APEX1(85)	NP_079272	GeneID:85476	GFM1(746)
	1	mice-tumour-7-F20-2-ex2_FS-65v.29447.29447.4.0.dta	4	3026.59	1	0.00328166	0.001707	0.564002	3.80068e-19	1
331	GLDWVKEEAPDILCLQETK(6)-KGKAKN(3)	3026.59	Carbamidomethyl[C](14)	NP_542380 GeneID:328 APEX1(85)-NP_079272 GeneID:85476 GFM1(748)/NP_542379 GeneID:328 APEX1(85)-NP_079272 GeneID:85476 GFM1(748)/NP_001632 GeneID:328 APEX1(85)-NP_079272 GeneID:85476 GFM1(748)/NP_001231178 GeneID:328 APEX1(85)-NP_079272 GeneID:85476 GFM1(748)/	Inter-Protein							NP_542380	GeneID:328	APEX1(85)	NP_079272	GeneID:85476	GFM1(748)
	1	mice-tumour-7-F20-1-ex2_FS-65v.29544.29544.4.0.dta	4	3026.59	1	0.483502	0.003427	1.1323	4.90231e-08	1
	2	mice-tumour-7-F20-1-ex2_FS-65v.29535.29535.4.0.dta	4	3026.59	1	0.490119	0.003427	1.1323	2.43704e-13	1
332	GLFGVPELSAPEGFHIAQEKALR(20)-KTELLVDR(1)	3576.94	null	NP_005923 GeneID:4285 MIPEP(83)-NP_005923 GeneID:4285 MIPEP(87)/	Intra-Protein							NP_005923	GeneID:4285	MIPEP(83)	NP_005923	GeneID:4285	MIPEP(87)
	1	mice-tumour-7-F20-2-ex2_FS-65v.29453.29453.5.0.dta	5	3576.94	1.69591e-07	0.000138026	-0.00672	-1.8787	1	5.25276e-07
	2	mice-tumour-7-F20-3-ex2_FS-65v.29515.29515.5.0.dta	5	3576.94	1.00711e-07	0.0091374	-0.006718	-1.87814	6.88792e-07	5.41042e-08
	3	mice-tumour-7-F20-1-ex2_FS-65v.29546.29546.5.0.dta	5	3576.94	1.61423e-08	0.194434	-0.005612	-1.56894	0.00516867	2.37685e-08
333	GLFIIDGKGVLR(8)-LSDYKGK(5)	2235.27	null	NP_005800 GeneID:7001 PRDX2(135)-NP_005800 GeneID:7001 PRDX2(34)/	Intra-Protein							NP_005800	GeneID:7001	PRDX2(135)	NP_005800	GeneID:7001	PRDX2(34)
	1	mice-tumour-7-F16-1-ex2_FS-45v.22127.22127.4.1.dta	4	2235.27	0.0281726	0.227067	-0.00055	-0.246055	0.0016928	0.0249451
334	GLFKDFFPETGTK(4)-LLVTKKEEGPWK(5)	3051.64	null	NP_001035526 GeneID:51067 YARS2(49)-NP_002444 GeneID:4528 MTIF2(72)/NP_001035526 GeneID:51067 YARS2(49)-NP_001005369 GeneID:4528 MTIF2(72)/	Inter-Protein							NP_001035526	GeneID:51067	YARS2(49)	NP_002444	GeneID:4528	MTIF2(72)
	1	mice-tumour-7-F17-1-ex2_FS-45v.17644.17644.6.2.dta	6	3051.64	0.0491506	0.355256	0.000531	0.174005	0.00125762	0.193732
335	GLKLTFDSSFSPNTGK(3)-IKTGYK(2)	2545.35	null	NP_003365 GeneID:7416 VDAC1(96)-NP_003365 GeneID:7416 VDAC1(115)/	Intra-Protein							NP_003365	GeneID:7416	VDAC1(96)	NP_003365	GeneID:7416	VDAC1(115)
	1	mice-tumour-7-F13-3-ex2_FS-65V.19428.19428.4.0.dta	4	2545.35	0.000246675	3.39598e-05	-0.003169	-1.24501	7.96508e-11	0.00214161
	2	mice-tumour-7-F13-1-ex2_FS-65V.19592.19592.4.0.dta	4	2545.35	0.000148802	0.000782691	-0.002766	-1.08668	2.24491e-08	0.00213558
	3	mice-tumour-7-F14-3-ex2_FS-65V.19620.19620.4.0.dta	4	2545.35	0.000673387	0.00175328	-0.003357	-1.31887	6.5069e-10	0.000875214
	4	mice-tumour-7-F13-2-ex2_FS-65V.19509.19509.4.0.dta	4	2545.35	0.000878246	0.00511525	-0.005687	-2.23427	1.71911e-08	0.00151501
	5	mice-tumour-7-F13-1-ex2_FS-65V.19515.19515.4.1.dta	4	2545.35	0.188223	0.071546	-0.00285	-1.11969	0.000303979	0.117921
	6	mice-tumour-7-F14-1-ex2_FS-65V.19691.19691.4.0.dta	4	2545.35	0.304356	0.241979	-0.003507	-1.3778	8.66954e-09	0.0507387
	7	mice-tumour-7-F13-3-ex2_FS-65V.19471.19471.4.2.dta	4	2545.35	0.158355	0.287766	-0.003059	-1.2018	0.00520424	0.123264
336	GLKLTFDSSFSPNTGK(3)-VTGSLETKYR(8)	2989.55	null	NP_003365 GeneID:7416 VDAC1(96)-NP_003365 GeneID:7416 VDAC1(61)/	Intra-Protein							NP_003365	GeneID:7416	VDAC1(96)	NP_003365	GeneID:7416	VDAC1(61)
	1	mice-tumour-7-F14-1-ex2_FS-45V.21068.21068.4.0.dta	4	2989.54	0.00108987	0.00159796	-0.011382	-3.80726	1.26716e-05	0.00251602
	2	mice-tumour-7-F14-3-ex2_FS-45V.20975.20975.4.0.dta	4	2989.54	0.0162274	0.184019	-0.007814	-2.61377	0.000229942	0.110626
337	GLKTILK(3)-KISPKR(5)	1638.07	null	NP_000173 GeneID:3030 HADHA(386)-NP_000173 GeneID:3030 HADHA(259)/	Intra-Protein							NP_000173	GeneID:3030	HADHA(386)	NP_000173	GeneID:3030	HADHA(259)
	1	mice-tumour-7-F20-2-ex2_FS-45v.9220.9220.4.3.dta	4	1638.06	1	0.353741	-0.00877	-5.35387	0.328813	1
338	GLNPGKAIAEIK(6)-KMMATYK(1)	2220.21	null	NP_002991 GeneID:6390 SDHB(261)-NP_002991 GeneID:6390 SDHB(268)/	Intra-Protein							NP_002991	GeneID:6390	SDHB(261)	NP_002991	GeneID:6390	SDHB(268)
	1	mice-tumour-7-F9-1-ex2_FS-65v.18036.18036.3.0.dta	3	2220.21	4.0199e-07	2.19152e-07	-0.003545	-1.59669	7.87462e-09	4.99024e-09
	2	mice-tumour-7-F9-3-ex2_FS-65v.18142.18142.3.0.dta	3	2220.21	0.00174612	4.75832e-07	-0.001651	-0.743622	1.25721e-05	9.95523e-05
	3	mice-tumour-7-F9-1-ex2_FS-65v.18104.18104.3.0.dta	3	2220.21	9.79034e-07	6.10919e-07	-0.00358	-1.61246	1.04672e-07	3.97784e-07
	4	mice-tumour-7-F9-2-ex2_FS-45V.15088.15088.4.1.dta	4	2220.21	1.21784e-06	0.000170651	-0.002639	-1.18863	6.03164e-07	5.95791e-07
	5	mice-tumour-7-F9-2-ex2_FS-45V.15068.15068.4.1.dta	4	2220.21	3.88428e-06	0.000455796	-0.002382	-1.07287	1.93536e-06	6.08481e-06
	6	mice-tumour-7-F9-2-ex2_FS-65V.17986.17986.3.0.dta	3	2220.21	0.00010213	0.00305688	-0.004822	-2.17186	0.0159954	0.000117702
	7	mice-tumour-7-F9-3-ex2_FS-45v.15261.15261.4.1.dta	4	2220.21	9.73929e-07	0.0140739	-0.003146	-1.41698	5.36375e-07	3.60865e-06
	8	mice-tumour-7-F9-3-ex2_FS-45v.15324.15324.4.0.dta	4	2220.21	0.000126383	0.0141349	-0.003146	-1.41698	4.0637e-06	4.22793e-05
	9	mice-tumour-7-F9-2-ex2_FS-65V.18051.18051.3.0.dta	3	2220.21	0.187833	0.0912	-0.004822	-2.17186	0.383552	0.408737
339	GLNSESMTEETLKR(13)-AKEIGFSDK(2)	2726.36	null	NP_001116105 GeneID:1373 CPS1(911)-NP_001116105 GeneID:1373 CPS1(914)/NP_001116105 GeneID:1373 CPS1(911)-NP_001866 GeneID:1373 CPS1(908)/NP_001116105 GeneID:1373 CPS1(911)-NP_001116106 GeneID:1373 CPS1(457)/NP_001866 GeneID:1373 CPS1(905)-NP_001116105 GeneID:1373 CPS1(914)/NP_001866 GeneID:1373 CPS1(905)-NP_001866 GeneID:1373 CPS1(908)/NP_001866 GeneID:1373 CPS1(905)-NP_001116106 GeneID:1373 CPS1…	Intra-Protein							NP_001866	GeneID:1373	CPS1(905)	NP_001866	GeneID:1373	CPS1(908)
	1	mice-tumour-7-F18-1-ex2_FS-65v.16814.16814.4.0.dta	4	2726.35	3.42605e-09	4.09547e-08	-0.007044	-2.58367	5.74826e-09	1.79513e-19
	2	mice-tumour-7-F18-2-ex2_FS-65v.16676.16676.4.0.dta	4	2726.35	1.56443e-10	3.52891e-05	-0.008155	-2.99117	1.03909e-08	1.58772e-23
	3	mice-tumour-7-F18-3-ex2_FS-65v.16714.16714.4.0.dta	4	2726.35	1.75236e-07	0.000750268	-0.006206	-2.2763	8.74891e-07	2.83546e-14
	4	mice-tumour-7-F17-2-ex2_FS-65v.16388.16388.4.2.dta	4	2726.33	3.36163e-09	0.00153933	-0.021148	-7.75688	8.20577e-08	1.1842e-18
	5	mice-tumour-7-F18-2-ex2_FS-45v.15477.15477.3.0.dta	3	2726.35	1.90421e-12	0.0038645	-0.006958	-2.55213	4.75603e-15	1.87449e-24
	6	mice-tumour-7-F18-1-ex2_FS-65v.13823.13823.4.1.dta	4	2742.35	9.81269e-05	0.0549398	-0.004606	-1.67958	0.000526398	1.34532e-14
	7	mice-tumour-7-F18-1-ex2_FS-45v.15545.15545.3.0.dta	3	2726.35	7.99838e-11	0.0842218	-0.005719	-2.09767	6.69488e-14	1.16588e-22
	8	mice-tumour-7-F17-3-ex2_FS-65v.16399.16399.4.2.dta	4	2726.34	1.54267e-06	0.151709	-0.017459	-6.40379	4.12249e-06	9.82185e-16
	9	mice-tumour-7-F17-1-ex2_FS-65v.16350.16350.4.1.dta	4	2726.34	1.32838e-09	0.196114	-0.019934	-7.31159	1.93378e-07	7.63157e-20
	10	mice-tumour-7-F17-1-ex2_FS-65v.16391.16391.4.2.dta	4	2726.34	4.49874e-05	0.533858	-0.019791	-7.25914	3.43273e-05	1.51854e-13
340	GLNSESMTEETLKR(13)-DILNMEKTLK(7)	2936.5	null	NP_001116105 GeneID:1373 CPS1(911)-NP_001116105 GeneID:1373 CPS1(895)/NP_001116105 GeneID:1373 CPS1(911)-NP_001866 GeneID:1373 CPS1(889)/NP_001116105 GeneID:1373 CPS1(911)-NP_001116106 GeneID:1373 CPS1(438)/NP_001866 GeneID:1373 CPS1(905)-NP_001116105 GeneID:1373 CPS1(895)/NP_001866 GeneID:1373 CPS1(905)-NP_001866 GeneID:1373 CPS1(889)/NP_001866 GeneID:1373 CPS1(905)-NP_001116106 GeneID:1373 CPS1…	Intra-Protein							NP_001866	GeneID:1373	CPS1(905)	NP_001866	GeneID:1373	CPS1(889)
	1	mice-tumour-7-F19-2-ex2_FS-65v.22103.22103.4.0.dta	4	2936.49	0.250631	0.182373	-0.007606	-2.59016	0.321582	0.0205344
341	GLNSESMTEETLKR(13)-EIGFSDKQISK(7)	2983.49	null	NP_001116105 GeneID:1373 CPS1(911)-NP_001116105 GeneID:1373 CPS1(921)/NP_001116105 GeneID:1373 CPS1(911)-NP_001866 GeneID:1373 CPS1(915)/NP_001116105 GeneID:1373 CPS1(911)-NP_001116106 GeneID:1373 CPS1(464)/NP_001866 GeneID:1373 CPS1(905)-NP_001116105 GeneID:1373 CPS1(921)/NP_001866 GeneID:1373 CPS1(905)-NP_001866 GeneID:1373 CPS1(915)/NP_001866 GeneID:1373 CPS1(905)-NP_001116106 GeneID:1373 CPS1…	Intra-Protein							NP_001866	GeneID:1373	CPS1(905)	NP_001866	GeneID:1373	CPS1(915)
	1	mice-tumour-7-F18-2-ex2_FS-45v.16755.16755.3.0.dta	3	2983.49	0.000185784	1.46391e-05	0.000184	0.061673	2.75717e-06	2.74624e-15
	2	mice-tumour-7-F18-2-ex2_FS-65v.18011.18011.4.0.dta	4	2983.49	4.69858e-06	3.99118e-05	-0.005581	-1.87063	5.07903e-06	1.85929e-08
	3	mice-tumour-7-F18-1-ex2_FS-65v.18152.18152.4.0.dta	4	2983.48	7.83057e-05	0.000762306	-0.01328	-4.45116	0.000293145	6.91506e-05
	4	mice-tumour-7-F18-3-ex2_FS-65v.18044.18044.4.0.dta	4	2983.49	0.00122177	0.0112138	-0.006194	-2.07609	5.51386e-05	0.00024946
	5	mice-tumour-7-F18-1-ex2_FS-45v.16842.16842.3.0.dta	3	2983.49	2.75603e-05	0.0424736	0.002166	0.725995	7.30185e-09	4.27908e-13
342	GMKGLVYETSVLDPDEGIR(3)-FVDSKSG(5)	2955.47	null	NP_004068 GeneID:1431 CS(76)-NP_004068 GeneID:1431 CS(464)/	Intra-Protein							NP_004068	GeneID:1431	CS(76)	NP_004068	GeneID:1431	CS(464)
	1	mice-tumour-7-F20-3-ex2_FS-45v.25405.25405.3.0.dta	3	2955.46	0.000342546	0.0230052	-0.005594	-1.89276	8.9814e-12	0.00375724
343	GMKVELSTVNVR(3)-KDLLGIIK(1)	2369.38	null	NP_005821 GeneID:10240 MRPS31(107)-NP_005821 GeneID:10240 MRPS31(97)/	Intra-Protein							NP_005821	GeneID:10240	MRPS31(107)	NP_005821	GeneID:10240	MRPS31(97)
	1	mice-tumour-7-F13-1-ex2_FS-65V.27065.27065.4.0.dta	4	2369.38	6.13734e-05	0.000122673	-0.003172	-1.33875	0.218392	0.000110663
344	GMSLNLEPDNVGVVVFGNDKLIK(20)-EGDIVKR(6)	3411.82	null	NP_004037 GeneID:498 ATP5F1A(123)-NP_004037 GeneID:498 ATP5F1A(132)/NP_004037 GeneID:498 ATP5F1A(123)-NP_001001935 GeneID:498 ATP5F1A(82)/NP_004037 GeneID:498 ATP5F1A(123)-NP_001244264 GeneID:498 ATP5F1A(82)/NP_004037 GeneID:498 ATP5F1A(123)-NP_001244263 GeneID:498 ATP5F1A(132)/NP_004037 GeneID:498 ATP5F1A(123)-NP_001001937 GeneID:498 ATP5F1A(132)/NP_001001935 GeneID:498 ATP5F1A(73)-NP_004037 Gen…	Intra-Protein							NP_001244264	GeneID:498	ATP5F1A(73)	NP_001244264	GeneID:498	ATP5F1A(82)
	1	mice-tumour-7-F19-2-ex2_FS-45v.28501.28501.4.0.dta	4	3411.83	4.61196e-06	0.118208	0.008247	2.41719	8.93113e-13	5.73278e-07
345	GNPTKVVAVDCGIK(5)-DVKVYGK(3)	2403.3	Carbamidomethyl[C](11)	NP_001116105 GeneID:1373 CPS1(225)-NP_001116105 GeneID:1373 CPS1(216)/NP_001116105 GeneID:1373 CPS1(225)-NP_001866 GeneID:1373 CPS1(210)/NP_001866 GeneID:1373 CPS1(219)-NP_001116105 GeneID:1373 CPS1(216)/NP_001866 GeneID:1373 CPS1(219)-NP_001866 GeneID:1373 CPS1(210)/	Intra-Protein							NP_001866	GeneID:1373	CPS1(219)	NP_001866	GeneID:1373	CPS1(210)
	1	mice-tumour-7-F10-1-ex2_FS-65v.15516.15516.3.0.dta	3	2403.29	1.25064e-07	0.00573709	-0.00434	-1.80585	7.41244e-12	0.00023112
	2	mice-tumour-7-F10-2-ex2_FS-45v.13258.13258.4.1.dta	4	2403.29	0.0105595	0.0837948	-0.0039	-1.62277	6.78544e-05	0.00256006
	3	mice-tumour-7-F10-1-ex2_FS-45v.13325.13325.4.1.dta	4	2403.29	0.00764138	0.145677	-0.003428	-1.42637	0.0139708	0.000677754
	4	mice-tumour-7-F10-3-ex2_FS-45v.13279.13279.4.1.dta	4	2403.29	0.000290341	0.16746	-0.007895	-3.28507	3.33091e-05	0.000118824
	5	mice-tumour-7-F10-2-ex2_FS-45v.13221.13221.4.2.dta	4	2403.29	0.00194633	0.218655	-0.003889	-1.6182	0.0304903	0.00822378
	6	mice-tumour-7-F11-1-ex2_FS-45v.13784.13784.4.2.dta	4	2403.3	0.0287036	0.229913	0.003292	1.36979	0.109595	0.00683971
	7	mice-tumour-7-F10-3-ex2_FS-45v.13364.13364.4.0.dta	4	2403.29	0.0191141	0.597403	-0.008032	-3.34208	0.00178261	0.0143184
346	GNPTKVVAVDCGIK(5)-QNLIAEVSTKDVK(10)	3039.64	Carbamidomethyl[C](11)	NP_001116105 GeneID:1373 CPS1(225)-NP_001116105 GeneID:1373 CPS1(213)/NP_001116105 GeneID:1373 CPS1(225)-NP_001866 GeneID:1373 CPS1(207)/NP_001866 GeneID:1373 CPS1(219)-NP_001116105 GeneID:1373 CPS1(213)/NP_001866 GeneID:1373 CPS1(219)-NP_001866 GeneID:1373 CPS1(207)/	Intra-Protein							NP_001866	GeneID:1373	CPS1(219)	NP_001866	GeneID:1373	CPS1(207)
	1	mice-tumour-7-F13-2-ex2_FS-45V.20446.20446.4.0.dta	4	3039.63	0.00225604	0.125004	-0.007657	-2.51905	0.000165807	0.0223833
	2	mice-tumour-7-F13-1-ex2_FS-45V.20512.20512.4.1.dta	4	3039.63	0.00304522	0.279693	-0.004504	-1.48175	0.000364878	0.0184118
	3	mice-tumour-7-F13-3-ex2_FS-45V.20454.20454.4.0.dta	4	3039.63	0.0363337	0.324035	-0.007794	-2.56412	2.8245e-05	0.059354
347	GNVYFDLKSR(8)-GDKYGK(3)	2003.02	null	NP_078813 GeneID:79587 CARS2(198)-NP_078813 GeneID:79587 CARS2(203)/	Intra-Protein							NP_078813	GeneID:79587	CARS2(198)	NP_078813	GeneID:79587	CARS2(203)
	1	mice-tumour-7-F11-3-ex2_FS-65v.15855.15855.3.0.dta	3	2003.02	2.23645e-08	0.002274	-0.004105	-2.0494	5.45851e-09	6.54659e-07
	2	mice-tumour-7-F11-1-ex2_FS-65v.16161.16161.3.0.dta	3	2003.02	2.4172e-07	0.00723912	-0.002743	-1.36943	1.75433e-10	3.95374e-08
348	GPDWILGEIKTSGLR(10)-WSFMNKPSDGRPK(6)	3328.71	null	NP_001159574 GeneID:4723 NDUFV1(72)-NP_001159574 GeneID:4723 NDUFV1(95)/NP_001159574 GeneID:4723 NDUFV1(72)-NP_009034 GeneID:4723 NDUFV1(104)/NP_009034 GeneID:4723 NDUFV1(81)-NP_001159574 GeneID:4723 NDUFV1(95)/NP_009034 GeneID:4723 NDUFV1(81)-NP_009034 GeneID:4723 NDUFV1(104)/	Intra-Protein							NP_001159574	GeneID:4723	NDUFV1(72)	NP_001159574	GeneID:4723	NDUFV1(95)
	1	mice-tumour-7-F17-1-ex2_FS-65v.29896.29896.5.3.dta	5	3328.7	2.55368e-05	0.289205	-0.011076	-3.32741	8.04736e-08	5.04083e-06
349	GPNVFKGYLKDPDRTK(10)-KLLGLAYPERRR(1)	3443.93	null	NP_056071 GeneID:23305 ACSL6(546)-NP_036221 GeneID:23456 ABCB10(159)/NP_001009185 GeneID:23305 ACSL6(546)-NP_036221 GeneID:23456 ABCB10(159)/NP_001192176 GeneID:23305 ACSL6(511)-NP_036221 GeneID:23456 ABCB10(159)/NP_001192177 GeneID:23305 ACSL6(521)-NP_036221 GeneID:23456 ABCB10(159)/NP_001192179 GeneID:23305 ACSL6(532)-NP_036221 GeneID:23456 ABCB10(159)/NP_001192180 GeneID:23305 ACSL6(446)-NP_03…	Inter-Protein							NP_056071	GeneID:23305	ACSL6(546)	NP_036221	GeneID:23456	ABCB10(159)
	1	mice-tumour-7-F4-3-ex2_FS-65v.25818.25818.4.4.dta	4	3443.92	1	0.478466	-0.006452	-1.87344	1	1
350	GPVGLEGLLTTKWLLR(12)-GKDHVVSDFSEHGSLK(2)	3631.95	null	NP_002851 GeneID:5832 ALDH18A1(761)-NP_002851 GeneID:5832 ALDH18A1(767)/NP_002851 GeneID:5832 ALDH18A1(761)-NP_001017423 GeneID:5832 ALDH18A1(765)/NP_001017423 GeneID:5832 ALDH18A1(759)-NP_002851 GeneID:5832 ALDH18A1(767)/NP_001017423 GeneID:5832 ALDH18A1(759)-NP_001017423 GeneID:5832 ALDH18A1(765)/	Intra-Protein							NP_002851	GeneID:5832	ALDH18A1(761)	NP_002851	GeneID:5832	ALDH18A1(767)
	1	mice-tumour-7-F20-2-ex2_FS-65v.29779.29779.6.0.dta	6	3631.94	0.206014	7.90025e-07	-0.006474	-1.78251	0.0416876	0.00913948
	2	mice-tumour-7-F20-3-ex2_FS-65v.29826.29826.6.1.dta	6	3631.94	2.16524e-05	0.000239215	-0.00457	-1.25828	0.00177975	4.24852e-09
	3	mice-tumour-7-F20-3-ex2_FS-65v.29849.29849.6.1.dta	6	3631.94	1	0.00307924	-0.00457	-1.25828	1	1
	4	mice-tumour-7-F20-1-ex2_FS-65v.29891.29891.6.0.dta	6	3631.95	1	0.110522	-0.002542	-0.6999	1	1
351	GQKCEFQDAYVLLSEK(3)-ESVKRLLNVT(4)	3210.67	Carbamidomethyl[C](4)	NP_002147 GeneID:3329 HSPD1(236)-NP_068593 GeneID:60488 MRPS35(317)/NP_955472 GeneID:3329 HSPD1(236)-NP_068593 GeneID:60488 MRPS35(317)/	Inter-Protein							NP_002147	GeneID:3329	HSPD1(236)	NP_068593	GeneID:60488	MRPS35(317)
	1	mice-tumour-7-F14-2-ex2_FS-45V.23481.23481.4.1.dta	4	3210.67	1	0.331195	0.001974	0.614825	3.15672e-07	1
352	GQQQVFKGLNDK(7)-KALTSFER(1)	2450.3	null	NP_000173 GeneID:3030 HADHA(406)-NP_000173 GeneID:3030 HADHA(415)/	Intra-Protein							NP_000173	GeneID:3030	HADHA(406)	NP_000173	GeneID:3030	HADHA(415)
	1	mice-tumour-7-F7-2-ex2_FS-45V.14527.14527.3.0.dta	3	2450.3	7.44869e-19	2.64476e-08	-0.001675	-0.683589	7.79835e-07	2.30473e-09
	2	mice-tumour-7-F7-2-ex2_FS-45V.14542.14542.3.0.dta	3	2450.3	1.35914e-07	2.50004e-06	-0.001675	-0.683589	2.81036e-07	6.67838e-06
	3	mice-tumour-7-F7-1-ex2_FS-45V.14697.14697.3.0.dta	3	2450.31	7.8696e-08	0.000122383	0.004463	1.82141	1.59975e-07	4.39659e-07
353	GSAGLSR(1)-ELSKSR(4)	1503.81	null	NP_056494 GeneID:26995 TRUB2(2)-NP_068605 GeneID:7350 UCP1(298)/	Inter-Protein							NP_056494	GeneID:26995	TRUB2(2)	NP_068605	GeneID:7350	UCP1(298)
	1	mice-tumour-7-F5-1-ex2_FS-45v.16634.16634.2.1.dta	2	1503.8	0.236791	0.341296	-0.012342	-8.20714	0.266418	0.00495035
354	GSAGLSR(1)-KPPAPK(1)	1421.81	null	NP_056494 GeneID:26995 TRUB2(2)-NP_056494 GeneID:26995 TRUB2(42)/	Intra-Protein							NP_056494	GeneID:26995	TRUB2(2)	NP_056494	GeneID:26995	TRUB2(42)
	1	mice-tumour-7-F2-2-ex2-_FS-45v.2749.2749.3.0.dta	3	1421.82	1	0.337739	0.009746	6.85464	1	1
	2	mice-tumour-7-F2-1-ex2_FS-45V.2804.2804.3.0.dta	3	1421.82	0.627131	0.421643	0.009967	7.01007	0.478475	0.861101
355	GSDSLIKGK(7)-NPGYIKLR(6)	2002.13	null	NP_001138303 GeneID:11331 PHB2(296)-NP_001138303 GeneID:11331 PHB2(250)/NP_001138303 GeneID:11331 PHB2(296)-NP_001254629 GeneID:11331 PHB2(212)/NP_001254629 GeneID:11331 PHB2(258)-NP_001138303 GeneID:11331 PHB2(250)/NP_001254629 GeneID:11331 PHB2(258)-NP_001254629 GeneID:11331 PHB2(212)/	Intra-Protein							NP_001138303	GeneID:11331	PHB2(296)	NP_001138303	GeneID:11331	PHB2(250)
	1	mice-tumour-7-F4-2-ex2_FS-65V.15343.15343.3.0.dta	3	2002.13	0.000371855	8.84538e-07	-0.00217	-1.08384	3.09904e-08	0.0132821
	2	mice-tumour-7-F4-3-ex2_FS-65v.15541.15541.3.0.dta	3	2002.13	3.71571e-05	0.0035797	-0.002653	-1.32509	2.69621e-09	0.00162546
356	GSEQESVKEFLAK(8)-AKEDFLK(2)	2439.27	null	NP_002721 GeneID:5566 PRKACA(17)-NP_002721 GeneID:5566 PRKACA(24)/NP_002721 GeneID:5566 PRKACA(17)-NP_997401 GeneID:5566 PRKACA(16)/	Intra-Protein							NP_002721	GeneID:5566	PRKACA(17)	NP_002721	GeneID:5566	PRKACA(24)
	1	mice-tumour-7-F19-3-ex2_FS-45v.21311.21311.4.0.dta	4	2439.26	1.22615e-09	0.000122	-0.002481	-1.01711	1.19695e-12	1.67876e-07
	2	mice-tumour-7-F19-1-ex2_FS-45v.21409.21409.4.0.dta	4	2439.26	6.92024e-11	0.000169858	-0.004431	-1.81653	1.5761e-10	5.54196e-10
	3	mice-tumour-7-F19-3-ex2_FS-45v.21310.21310.3.0.dta	3	2439.26	4.57933e-08	0.000414307	-0.00534	-2.18918	6.25908e-10	9.99432e-07
	4	mice-tumour-7-F19-3-ex2_FS-45v.21323.21323.3.0.dta	3	2439.26	0.00413097	0.0117117	-0.00534	-2.18918	0.000189252	0.00350905
	5	mice-tumour-7-F19-2-ex2_FS-45v.21428.21428.3.0.dta	3	2439.26	5.34838e-05	0.022821	-0.005475	-2.24453	4.67197e-07	0.000223264
	6	mice-tumour-7-F18-1-ex2_FS-45v.21364.21364.4.0.dta	4	2439.26	9.18921e-05	0.109411	-0.009011	-3.69414	0.00188973	0.00310159
357	GSLSGLR(1)-VKIATK(2)	1485.9	null	NP_055182 GeneID:26355 FAM162A(2)-NP_003680 GeneID:8574 AKR7A2(101)/	Inter-Protein							NP_055182	GeneID:26355	FAM162A(2)	NP_003680	GeneID:8574	AKR7A2(101)
	1	mice-tumour-7-F5-1-ex2_FS-45v.2594.2594.4.0.dta	4	1485.89	0.117061	0.290805	-0.012431	-8.36597	0.181563	0.0717794
358	GSPLRFDGR(1)-DPKDLK(3)	1856.99	null	NP_000405 GeneID:3295 HSD17B4(2)-NP_000405 GeneID:3295 HSD17B4(359)/NP_000405 GeneID:3295 HSD17B4(2)-NP_001186220 GeneID:3295 HSD17B4(384)/NP_000405 GeneID:3295 HSD17B4(2)-NP_001186221 GeneID:3295 HSD17B4(341)/NP_001186221 GeneID:3295 HSD17B4(2)-NP_000405 GeneID:3295 HSD17B4(359)/NP_001186221 GeneID:3295 HSD17B4(2)-NP_001186220 GeneID:3295 HSD17B4(384)/NP_001186221 GeneID:3295 HSD17B4(2)-NP_00118…	Intra-Protein							NP_000405	GeneID:3295	HSD17B4(2)	NP_000405	GeneID:3295	HSD17B4(359)
	1	mice-tumour-7-F8-2-ex2_FS65V.26699.26699.3.2.dta	3	1857	1	0.251016	0.009856	5.30752	1	1
359	GSTKWVHQACLQR(4)-WVDEKQR(5)	2668.34	Carbamidomethyl[C](10)	NP_060294 GeneID:54708 MARCHF5(40)-NP_060294 GeneID:54708 MARCHF5(54)/	Intra-Protein							NP_060294	GeneID:54708	MARCHF5(40)	NP_060294	GeneID:54708	MARCHF5(54)
	1	mice-tumour-7-F5-2-ex2_FS-65v.10693.10693.4.0.dta	4	2668.34	0.202208	0.000210996	-0.00596	-2.2336	1.11573e-05	0.0364828
	2	mice-tumour-7-F5-1-ex2_FS-65v.10691.10691.4.1.dta	4	2668.33	0.0484472	0.235848	-0.008782	-3.29118	0.000420323	0.0175875
360	GVFTKELPSGK(5)-AAKLAPEFAK(3)	2345.31	null	NP_004896 GeneID:9588 PRDX6(209)-NP_004896 GeneID:9588 PRDX6(56)/	Intra-Protein							NP_004896	GeneID:9588	PRDX6(209)	NP_004896	GeneID:9588	PRDX6(56)
	1	mice-tumour-7-F12-1-ex2_FS-65v.20518.20518.3.0.dta	3	2345.3	2.32739e-06	2.36531e-06	-0.006639	-2.83075	1.51003e-07	8.69508e-10
	2	mice-tumour-7-F12-2-ex2_FS-65v.20349.20349.3.0.dta	3	2345.3	0.00018888	1.6415e-05	-0.007605	-3.24264	1.42563e-06	9.33892e-09
	3	mice-tumour-7-F12-1-ex2_FS-65v.20554.20554.3.0.dta	3	2345.3	6.73448e-07	1.89877e-05	-0.006639	-2.83075	3.27896e-08	8.58194e-11
	4	mice-tumour-7-F12-2-ex2_FS-65v.20406.20406.3.0.dta	3	2345.3	0.0213172	0.000802553	-0.007605	-3.24264	0.011026	1.35015e-05
	5	mice-tumour-7-F12-1-ex2_FS-45v.18969.18969.4.4.dta	4	2345.31	0.00802942	0.00112557	-0.001554	-0.662599	0.0030166	2.27447e-05
	6	mice-tumour-7-F12-3-ex2_FS-65V.20138.20138.3.0.dta	3	2345.3	1.06242e-13	0.0019541	-0.009717	-4.14316	6.57954e-11	6.95941e-12
	7	mice-tumour-7-F12-1-ex2_FS-45v.18947.18947.4.2.dta	4	2345.31	0.0305255	0.00356443	-0.001554	-0.662599	0.0235115	1.2884e-05
	8	mice-tumour-7-F12-3-ex2_FS-65V.20158.20158.3.0.dta	3	2345.3	1.5186e-09	0.00761554	-0.009717	-4.14316	1.038e-07	4.78235e-11
	9	mice-tumour-7-F12-3-ex2_FS-45V.18659.18659.4.1.dta	4	2345.31	0.00495305	0.0104954	-0.001572	-0.670273	0.00591184	4.22542e-08
	10	mice-tumour-7-F12-1-ex2_FS-65v.20551.20551.3.0.dta	3	2345.3	0.0517939	0.0391499	-0.006639	-2.83075	0.118014	0.0101174
361	GVGAKLGLR(5)-YVELKK(5)	1787.08	null	NP_002479 GeneID:4695 NDUFA2(13)-NP_002479 GeneID:4695 NDUFA2(45)/NP_002479 GeneID:4695 NDUFA2(13)-NP_001171941 GeneID:4695 NDUFA2(45)/NP_001171941 GeneID:4695 NDUFA2(13)-NP_002479 GeneID:4695 NDUFA2(45)/NP_001171941 GeneID:4695 NDUFA2(13)-NP_001171941 GeneID:4695 NDUFA2(45)/	Intra-Protein							NP_002479	GeneID:4695	NDUFA2(45)	NP_002479	GeneID:4695	NDUFA2(13)
	1	mice-tumour-7-F8-3-ex2_FS65v.17572.17572.3.2.dta	3	1787.08	0.015091	0.0075674	-0.002103	-1.17678	0.00481089	0.00693466
	2	mice-tumour-7-F8-3-ex2_FS65v.17536.17536.3.2.dta	3	1787.08	0.230575	0.214357	-0.002103	-1.17678	0.237416	0.188133
362	GVGPVKENDEIEAGIHGLVSMTFK(6)-VEKPEY(3)	3428.73	null	NP_112485 GeneID:81889 FAHD1(200)-NP_112485 GeneID:81889 FAHD1(221)/	Intra-Protein							NP_112485	GeneID:81889	FAHD1(200)	NP_112485	GeneID:81889	FAHD1(221)
	1	mice-tumour-7-F1-2-ex2_FS-65V.31977.31977.4.0.dta	4	3428.72	1.21289e-07	0.0205293	-0.008375	-2.4426	1	0.000156303
	2	mice-tumour-7-F1-3-ex2_FS-65V.32019.32019.4.0.dta	4	3428.72	1.80588e-06	0.0249197	-0.011542	-3.36626	1	7.60471e-05
	3	mice-tumour-7-F1-1-ex2_FS-65v.32211.32211.4.2.dta	4	3428.72	2.15584e-06	0.0500266	-0.004506	-1.31419	0.00144284	1.82833e-06
	4	mice-tumour-7-F1-1-ex2_FS-65v.32225.32225.4.0.dta	4	3428.72	0.00189314	0.0777879	-0.004506	-1.31419	1	0.000155117
363	GVITVKDGK(6)-MALLPR(1)	1754.02	null	NP_002147 GeneID:3329 HSPD1(202)-NP_001182031 GeneID:2936 GSR(1)/NP_002147 GeneID:3329 HSPD1(202)-NP_000628 GeneID:2936 GSR(1)/NP_002147 GeneID:3329 HSPD1(202)-NP_001182033 GeneID:2936 GSR(1)/NP_002147 GeneID:3329 HSPD1(202)-NP_001182032 GeneID:2936 GSR(1)/NP_955472 GeneID:3329 HSPD1(202)-NP_001182031 GeneID:2936 GSR(1)/NP_955472 GeneID:3329 HSPD1(202)-NP_000628 GeneID:2936 GSR(1)/NP_955472 GeneI…	Inter-Protein							NP_002147	GeneID:3329	HSPD1(202)	NP_000628	GeneID:2936	GSR(1)
	1	mice-tumour-7-F2-2-ex2-_FS-45v.18803.18803.3.0.dta	3	1754.02	0.609924	0.404011	-0.003637	-2.07352	1	0.0172848
364	GVLLSGGQKQR(9)-ALLKNPK(4)	2063.23	null	NP_036221 GeneID:23456 ABCB10(639)-NP_036221 GeneID:23456 ABCB10(650)/	Intra-Protein							NP_036221	GeneID:23456	ABCB10(639)	NP_036221	GeneID:23456	ABCB10(650)
	1	mice-tumour-7-F4-1-ex2_FS-45V.10541.10541.4.0.dta	4	2063.23	0.031231	0.255624	-0.002158	-1.04593	0.0517515	0.0157288
365	GVMEKLQLGPEILQR(5)-SLVLDLKQPR(7)	3016.72	null	NP_001161067 GeneID:23600 AMACR(87)-NP_001161067 GeneID:23600 AMACR(58)/NP_001161067 GeneID:23600 AMACR(87)-NP_976316 GeneID:23600 AMACR(58)/NP_001161067 GeneID:23600 AMACR(87)-NP_055139 GeneID:23600 AMACR(58)/NP_976316 GeneID:23600 AMACR(87)-NP_001161067 GeneID:23600 AMACR(58)/NP_976316 GeneID:23600 AMACR(87)-NP_976316 GeneID:23600 AMACR(58)/NP_976316 GeneID:23600 AMACR(87)-NP_055139 GeneID:2360…	Intra-Protein							NP_001161067	GeneID:23600	AMACR(87)	NP_001161067	GeneID:23600	AMACR(58)
	1	mice-tumour-7-F16-3-ex2_FS-45v.28890.28890.4.1.dta	4	3016.72	1.20495e-06	0.000380931	-0.006439	-2.13444	2.72827e-06	0.000100942
366	GVMLAVDAVIAELKK(14)-DVKFGADAR(3)	2672.47	null	NP_002147 GeneID:3329 HSPD1(156)-NP_002147 GeneID:3329 HSPD1(31)/NP_002147 GeneID:3329 HSPD1(156)-NP_955472 GeneID:3329 HSPD1(31)/NP_955472 GeneID:3329 HSPD1(156)-NP_002147 GeneID:3329 HSPD1(31)/NP_955472 GeneID:3329 HSPD1(156)-NP_955472 GeneID:3329 HSPD1(31)/	Intra-Protein							NP_002147	GeneID:3329	HSPD1(156)	NP_002147	GeneID:3329	HSPD1(31)
	1	mice-tumour-7-F20-2-ex2_FS-65v.32316.32316.4.0.dta	4	2672.46	1	0.000246345	-0.0093	-3.47993	1	1
367	GVMLAVDAVIAELKK(14)-EGFEKISK(5)	2631.47	null	NP_002147 GeneID:3329 HSPD1(156)-NP_002147 GeneID:3329 HSPD1(130)/NP_002147 GeneID:3329 HSPD1(156)-NP_955472 GeneID:3329 HSPD1(130)/NP_955472 GeneID:3329 HSPD1(156)-NP_002147 GeneID:3329 HSPD1(130)/NP_955472 GeneID:3329 HSPD1(156)-NP_955472 GeneID:3329 HSPD1(130)/	Intra-Protein							NP_002147	GeneID:3329	HSPD1(156)	NP_002147	GeneID:3329	HSPD1(130)
	1	mice-tumour-7-F20-2-ex2_FS-65v.31908.31908.4.0.dta	4	2631.46	1.11584e-09	1.11511e-10	-0.00362	-1.37566	0.000190539	2.52688e-08
	2	mice-tumour-7-F20-3-ex2_FS-65v.32003.32003.4.0.dta	4	2631.47	1.68498e-06	2.63873e-05	-0.002053	-0.780173	5.7583e-08	3.39385e-08
	3	mice-tumour-7-F20-1-ex2_FS-65v.32012.32012.4.0.dta	4	2631.47	3.84184e-10	0.0177837	-0.002561	-0.973221	4.93957e-08	9.23596e-08
368	GVMLAVDAVIAELKK(14)-GVITVKDGK(6)	2610.51	null	NP_002147 GeneID:3329 HSPD1(156)-NP_002147 GeneID:3329 HSPD1(202)/NP_002147 GeneID:3329 HSPD1(156)-NP_955472 GeneID:3329 HSPD1(202)/NP_955472 GeneID:3329 HSPD1(156)-NP_002147 GeneID:3329 HSPD1(202)/NP_955472 GeneID:3329 HSPD1(156)-NP_955472 GeneID:3329 HSPD1(202)/	Intra-Protein							NP_002147	GeneID:3329	HSPD1(156)	NP_002147	GeneID:3329	HSPD1(202)
	1	mice-tumour-7-F19-1-ex2_FS-65v.31355.31355.4.0.dta	4	2610.51	3.49134e-15	0.000117725	-0.003639	-1.39398	6.09778e-05	5.66654e-05
	2	mice-tumour-7-F19-3-ex2_FS-65v.31400.31400.4.0.dta	4	2610.51	1.94049e-07	0.000470022	-0.004144	-1.58743	1.84416e-09	1.7581e-06
	3	mice-tumour-7-F19-2-ex2_FS-65v.31362.31362.4.0.dta	4	2610.51	0.000116468	0.000699727	-0.004094	-1.56827	2.97468e-05	0.000987342
	4	mice-tumour-7-F19-2-ex2_FS-65v.31385.31385.4.0.dta	4	2610.51	2.11211e-05	0.0236052	-0.004094	-1.56827	0.0811649	1.36163e-05
369	GVMLAVDAVIAELKK(14)-KGVITVK(1)	2438.47	null	NP_002147 GeneID:3329 HSPD1(156)-NP_002147 GeneID:3329 HSPD1(196)/NP_002147 GeneID:3329 HSPD1(156)-NP_955472 GeneID:3329 HSPD1(196)/NP_955472 GeneID:3329 HSPD1(156)-NP_002147 GeneID:3329 HSPD1(196)/NP_955472 GeneID:3329 HSPD1(156)-NP_955472 GeneID:3329 HSPD1(196)/	Intra-Protein							NP_002147	GeneID:3329	HSPD1(156)	NP_002147	GeneID:3329	HSPD1(196)
	1	mice-tumour-7-F18-3-ex2_FS-45v.30936.30936.4.0.dta	4	2438.47	2.16439e-07	3.34597e-23	0.000238	0.097602	7.30617e-08	3.10939e-07
	2	mice-tumour-7-F18-2-ex2_FS-45v.30905.30905.4.0.dta	4	2438.46	7.86277e-12	7.57369e-08	-0.003596	-1.4747	2.91752e-13	2.52141e-10
	3	mice-tumour-7-F18-1-ex2_FS-45v.30853.30853.4.0.dta	4	2438.46	8.82251e-15	0.000238448	-0.001653	-0.677885	1.14959e-13	8.24683e-13
370	GVMLAVDAVIAELKK(14)-SIAKEGFEK(4)	2702.5	null	NP_002147 GeneID:3329 HSPD1(156)-NP_002147 GeneID:3329 HSPD1(125)/NP_002147 GeneID:3329 HSPD1(156)-NP_955472 GeneID:3329 HSPD1(125)/NP_955472 GeneID:3329 HSPD1(156)-NP_002147 GeneID:3329 HSPD1(125)/NP_955472 GeneID:3329 HSPD1(156)-NP_955472 GeneID:3329 HSPD1(125)/	Intra-Protein							NP_002147	GeneID:3329	HSPD1(156)	NP_002147	GeneID:3329	HSPD1(125)
	1	mice-tumour-7-F20-2-ex2_FS-65v.31710.31710.4.0.dta	4	2702.5	3.3961e-12	2.28662e-15	-0.001209	-0.447363	1.48453e-09	1.28692e-14
	2	mice-tumour-7-F20-2-ex2_FS-65v.31708.31708.4.0.dta	4	2702.5	1.68789e-13	4.75124e-13	-0.001209	-0.447363	3.27886e-06	1.0662e-09
	3	mice-tumour-7-F20-3-ex2_FS-65v.31756.31756.4.0.dta	4	2702.51	4.85655e-08	3.19028e-06	0.003211	1.18816	1.48385e-06	8.49928e-10
	4	mice-tumour-7-F20-3-ex2_FS-65v.31784.31784.4.0.dta	4	2702.51	1.51846e-08	8.65902e-06	0.003211	1.18816	2.50038e-07	4.79596e-10
	5	mice-tumour-7-F20-3-ex2_FS-65v.31778.31778.4.0.dta	4	2702.51	2.87787e-07	9.21379e-06	0.003211	1.18816	2.92513e-06	2.43577e-11
	6	mice-tumour-7-F20-1-ex2_FS-65v.31793.31793.4.0.dta	4	2702.51	1.12712e-08	0.00277336	0.000625	0.231267	4.37793e-08	1.48158e-11
	7	mice-tumour-7-F20-1-ex2_FS-65v.31762.31762.4.0.dta	4	2702.51	1.6503e-07	0.00325335	0.000625	0.231267	2.34414e-08	3.11368e-10
	8	mice-tumour-7-F20-1-ex2_FS-65v.31784.31784.4.0.dta	4	2702.51	1.28193e-05	0.00913695	0.000625	0.231267	6.15297e-07	6.18631e-07
371	GVMLAVDAVIAELKK(14)-SIDLKDK(5)	2512.43	null	NP_002147 GeneID:3329 HSPD1(156)-NP_002147 GeneID:3329 HSPD1(87)/NP_002147 GeneID:3329 HSPD1(156)-NP_955472 GeneID:3329 HSPD1(87)/NP_955472 GeneID:3329 HSPD1(156)-NP_002147 GeneID:3329 HSPD1(87)/NP_955472 GeneID:3329 HSPD1(156)-NP_955472 GeneID:3329 HSPD1(87)/	Intra-Protein							NP_002147	GeneID:3329	HSPD1(156)	NP_002147	GeneID:3329	HSPD1(87)
	1	mice-tumour-7-F20-3-ex2_FS-65v.32117.32117.4.0.dta	4	2512.42	0.00820665	0.136886	-0.00876	-3.48666	4.66187e-05	0.00220896
372	GVMLAVDAVIAELKK(14)-VTKDGVTVAK(3)	2711.56	null	NP_002147 GeneID:3329 HSPD1(156)-NP_002147 GeneID:3329 HSPD1(75)/NP_002147 GeneID:3329 HSPD1(156)-NP_955472 GeneID:3329 HSPD1(75)/NP_955472 GeneID:3329 HSPD1(156)-NP_002147 GeneID:3329 HSPD1(75)/NP_955472 GeneID:3329 HSPD1(156)-NP_955472 GeneID:3329 HSPD1(75)/	Intra-Protein							NP_002147	GeneID:3329	HSPD1(156)	NP_002147	GeneID:3329	HSPD1(75)
	1	mice-tumour-7-F19-2-ex2_FS-65v.30978.30978.4.0.dta	4	2711.56	1.22484e-12	5.62598e-07	-0.004032	-1.48697	0.000183677	1.64355e-18
	2	mice-tumour-7-F19-3-ex2_FS-65v.30986.30986.4.0.dta	4	2711.55	0.000240815	1.30423e-05	-0.007681	-2.83268	1.10509e-07	1.27339e-06
	3	mice-tumour-7-F19-1-ex2_FS-65v.30978.30978.4.1.dta	4	2711.55	2.17096e-10	6.40213e-05	-0.010274	-3.78896	0.0444601	1.02781e-08
373	GVQKLVLTSR(4)-TGYQAKQVR(6)	2288.31	null	NP_004095 GeneID:2194 FASN(1911)-NP_004095 GeneID:2194 FASN(1927)/	Intra-Protein							NP_004095	GeneID:2194	FASN(1911)	NP_004095	GeneID:2194	FASN(1927)
	1	mice-tumour-7-F2-3-ex2_FS-45V.12633.12633.3.0.dta	3	2288.3	0.00052343	0.178439	-0.011112	-4.85599	0.000711432	0.0560756
	2	mice-tumour-7-F2-3-ex2_FS-45V.12625.12625.3.0.dta	3	2288.3	0.00142539	0.2093	-0.012569	-5.4927	0.000567728	0.00797443
374	GWKNAEMTR(3)-EGFLESFKK(8)	2314.15	null	NP_005006 GeneID:5018 OXA1L(430)-NP_005006 GeneID:5018 OXA1L(426)/	Intra-Protein							NP_005006	GeneID:5018	OXA1L(430)	NP_005006	GeneID:5018	OXA1L(426)
	1	mice-tumour-7-F17-2-ex2_FS-65v.22081.22081.3.0.dta	3	2314.15	4.42389e-05	0.0118308	-0.00643	-2.77855	3.61452e-08	9.64892e-05
	2	mice-tumour-7-F17-3-ex2_FS-65v.22077.22077.3.0.dta	3	2314.15	6.9969e-07	0.069929	-0.006458	-2.79065	3.59904e-09	9.70597e-07
	3	mice-tumour-7-F17-3-ex2_FS-65v.22070.22070.3.1.dta	3	2314.15	1.2996e-05	0.163371	-0.006252	-2.70164	5.08338e-06	2.64305e-05
	4	mice-tumour-7-F17-1-ex2_FS-65v.21947.21947.3.1.dta	3	2314.15	1.38696e-05	0.227947	-0.006094	-2.63336	2.56428e-06	6.2657e-05
375	GYKDPR(3)-LKEAVK(2)	1559.88	null	NP_057575 GeneID:51253 MRPL37(83)-NP_570847 GeneID:4976 OPA1(719)/NP_057575 GeneID:51253 MRPL37(83)-NP_570850 GeneID:4976 OPA1(756)/NP_057575 GeneID:51253 MRPL37(83)-NP_570844 GeneID:4976 OPA1(665)/NP_057575 GeneID:51253 MRPL37(83)-NP_570848 GeneID:4976 OPA1(720)/NP_057575 GeneID:51253 MRPL37(83)-NP_570849 GeneID:4976 OPA1(738)/NP_057575 GeneID:51253 MRPL37(83)-NP_056375 GeneID:4976 OPA1(701)/NP_…	Inter-Protein							NP_057575	GeneID:51253	MRPL37(83)	NP_570847	GeneID:4976	OPA1(719)
	1	mice-tumour-7-F2-1-ex2_FS-65v.19005.19005.3.1.dta	3	1559.88	0.449676	0.430397	-0.000279	-0.17886	0.424476	0.445311
376	GYLDKLEPSK(5)-AMKQVAGTMK(3)	2351.23	null	NP_004037 GeneID:498 ATP5F1A(498)-NP_004037 GeneID:498 ATP5F1A(427)/NP_004037 GeneID:498 ATP5F1A(498)-NP_001001935 GeneID:498 ATP5F1A(377)/NP_004037 GeneID:498 ATP5F1A(498)-NP_001244264 GeneID:498 ATP5F1A(377)/NP_004037 GeneID:498 ATP5F1A(498)-NP_001244263 GeneID:498 ATP5F1A(405)/NP_004037 GeneID:498 ATP5F1A(498)-NP_001001937 GeneID:498 ATP5F1A(427)/NP_001001935 GeneID:498 ATP5F1A(448)-NP_004037 …	Intra-Protein							NP_001244264	GeneID:498	ATP5F1A(448)	NP_001244264	GeneID:498	ATP5F1A(377)
	1	mice-tumour-7-F12-1-ex2_FS-65v.18377.18377.3.1.dta	3	2351.22	0.044606	0.00279964	-0.011612	-4.93868	0.00477117	0.00776274
	2	mice-tumour-7-F12-2-ex2_FS-65v.18273.18273.3.1.dta	3	2351.23	0.049073	0.00374419	-0.006201	-2.63734	0.0207175	0.0225721
	3	mice-tumour-7-F12-2-ex2_FS-65v.18248.18248.3.1.dta	3	2351.23	0.156809	0.0190946	-0.007862	-3.34377	0.0119959	0.0784444
377	HADIVTTTTHKTLR(11)-AVDPKTGR(5)	2574.4	null	NP_005403 GeneID:6472 SHMT2(280)-NP_005403 GeneID:6472 SHMT2(302)/NP_005403 GeneID:6472 SHMT2(280)-NP_001159831 GeneID:6472 SHMT2(281)/NP_005403 GeneID:6472 SHMT2(280)-NP_001159830 GeneID:6472 SHMT2(281)/NP_005403 GeneID:6472 SHMT2(280)-NP_001159828 GeneID:6472 SHMT2(292)/NP_005403 GeneID:6472 SHMT2(280)-NP_001159829 GeneID:6472 SHMT2(281)/NP_001159831 GeneID:6472 SHMT2(259)-NP_005403 GeneID:6472…	Intra-Protein							NP_005403	GeneID:6472	SHMT2(280)	NP_005403	GeneID:6472	SHMT2(302)
	1	mice-tumour-7-F2-1-ex2_FS-65v.8779.8779.4.1.dta	4	2574.4	0.00168888	0.103036	-0.000974	-0.378341	1.06397e-05	0.00144089
378	HADIVTTTTHKTLR(11)-GVKAVDPK(3)	2544.41	null	NP_005403 GeneID:6472 SHMT2(280)-NP_005403 GeneID:6472 SHMT2(297)/NP_005403 GeneID:6472 SHMT2(280)-NP_001159831 GeneID:6472 SHMT2(276)/NP_005403 GeneID:6472 SHMT2(280)-NP_001159830 GeneID:6472 SHMT2(276)/NP_005403 GeneID:6472 SHMT2(280)-NP_001159828 GeneID:6472 SHMT2(287)/NP_005403 GeneID:6472 SHMT2(280)-NP_001159829 GeneID:6472 SHMT2(276)/NP_001159831 GeneID:6472 SHMT2(259)-NP_005403 GeneID:6472…	Intra-Protein							NP_005403	GeneID:6472	SHMT2(280)	NP_005403	GeneID:6472	SHMT2(297)
	1	mice-tumour-7-F5-2-ex2_FS-65v.8990.8990.4.0.dta	4	2544.41	0.00392008	7.10148e-06	-0.002495	-0.980579	0.00441697	0.000990069
	2	mice-tumour-7-F5-3-ex2_FS-65v.9027.9027.4.1.dta	4	2544.41	5.95518e-05	2.77874e-05	-0.007308	-2.87217	1.26257e-06	1.77293e-05
	3	mice-tumour-7-F5-1-ex2_FS-65v.9031.9031.4.1.dta	4	2544.41	0.00152369	0.124852	-0.007098	-2.78964	9.2206e-07	0.000148957
	4	mice-tumour-7-F5-3-ex2_FS-65v.9071.9071.4.2.dta	4	2544.41	0.312504	0.400946	-0.007645	-3.00462	0.00244359	0.493752
379	HALIIYDDLSKQAVAYR(11)-FNDGSDEKK(8)	3152.59	null	NP_004037 GeneID:498 ATP5F1A(316)-NP_004037 GeneID:498 ATP5F1A(239)/NP_004037 GeneID:498 ATP5F1A(316)-NP_001001935 GeneID:498 ATP5F1A(189)/NP_004037 GeneID:498 ATP5F1A(316)-NP_001244264 GeneID:498 ATP5F1A(189)/NP_004037 GeneID:498 ATP5F1A(316)-NP_001244263 GeneID:498 ATP5F1A(217)/NP_004037 GeneID:498 ATP5F1A(316)-NP_001001937 GeneID:498 ATP5F1A(239)/NP_001001935 GeneID:498 ATP5F1A(266)-NP_004037 …	Intra-Protein							NP_001244264	GeneID:498	ATP5F1A(266)	NP_001244264	GeneID:498	ATP5F1A(189)
	1	mice-tumour-7-F14-3-ex2_FS-65V.26074.26074.5.0.dta	5	3152.58	1	0.498103	-0.011945	-3.78895	0.0904647	1
380	HALIIYDDLSKQAVAYR(11)-LRLPTVFR(1)	3114.75	null	NP_004037 GeneID:498 ATP5F1A(316)-NP_002147 GeneID:3329 HSPD1(2)/NP_004037 GeneID:498 ATP5F1A(316)-NP_955472 GeneID:3329 HSPD1(2)/NP_001001935 GeneID:498 ATP5F1A(266)-NP_002147 GeneID:3329 HSPD1(2)/NP_001001935 GeneID:498 ATP5F1A(266)-NP_955472 GeneID:3329 HSPD1(2)/NP_001244264 GeneID:498 ATP5F1A(266)-NP_002147 GeneID:3329 HSPD1(2)/NP_001244264 GeneID:498 ATP5F1A(266)-NP_955472 GeneID:3329 HSPD1(…	Inter-Protein							NP_001244264	GeneID:498	ATP5F1A(266)	NP_002147	GeneID:3329	HSPD1(2)
	1	mice-tumour-7-F11-1-ex2_FS-65v.23592.23592.5.0.dta	5	3114.73	1	0.511507	-0.019331	-6.20628	1	1
381	HALIIYDDLSKQAVAYR(11)-STVAQLVKR(8)	3114.73	null	NP_004037 GeneID:498 ATP5F1A(316)-NP_004037 GeneID:498 ATP5F1A(261)/NP_004037 GeneID:498 ATP5F1A(316)-NP_001001935 GeneID:498 ATP5F1A(211)/NP_004037 GeneID:498 ATP5F1A(316)-NP_001244264 GeneID:498 ATP5F1A(211)/NP_004037 GeneID:498 ATP5F1A(316)-NP_001244263 GeneID:498 ATP5F1A(239)/NP_004037 GeneID:498 ATP5F1A(316)-NP_001001937 GeneID:498 ATP5F1A(261)/NP_001001935 GeneID:498 ATP5F1A(266)-NP_004037 …	Intra-Protein							NP_001244264	GeneID:498	ATP5F1A(266)	NP_001244264	GeneID:498	ATP5F1A(211)
	1	mice-tumour-7-F11-2-ex2_FS-65v.23512.23512.5.1.dta	5	3114.73	1	0.0405657	-0.001509	-0.484472	1	1
382	HCEALKDFCTEWPAALDSDEK(6)-IPNFLHLTPVAIKK(13)	4250.13	Carbamidomethyl[C](2);Carbamidomethyl[C](9)	NP_001177793 GeneID:60488 MRPS35(127)-NP_001177793 GeneID:60488 MRPS35(120)/NP_001177793 GeneID:60488 MRPS35(127)-NP_068593 GeneID:60488 MRPS35(120)/NP_068593 GeneID:60488 MRPS35(127)-NP_001177793 GeneID:60488 MRPS35(120)/NP_068593 GeneID:60488 MRPS35(127)-NP_068593 GeneID:60488 MRPS35(120)/	Intra-Protein							NP_068593	GeneID:60488	MRPS35(127)	NP_068593	GeneID:60488	MRPS35(120)
	1	mice-tumour-7-F1-1-ex2_FS-45.28644.28644.5.1.dta	5	4250.14	6.61156e-05	0.0151975	0.008574	2.01735	2.68348e-11	1.70925e-05
383	HETLTSLNLEKK(11)-LKEEAAMK(2)	2469.33	null	NP_055182 GeneID:26355 FAM162A(139)-NP_055182 GeneID:26355 FAM162A(144)/	Intra-Protein							NP_055182	GeneID:26355	FAM162A(139)	NP_055182	GeneID:26355	FAM162A(144)
	1	mice-tumour-7-F16-3-ex2_FS-45v.11370.11370.3.0.dta	3	2469.32	4.85788e-12	6.97324e-08	-0.002624	-1.06264	8.25645e-06	2.86764e-09
	2	mice-tumour-7-F16-2-ex2_FS-45v.11227.11227.3.0.dta	3	2469.32	1.92504e-19	2.4938e-06	-0.006031	-2.44237	2.19232e-09	1.82332e-17
	3	mice-tumour-7-F16-3-ex2_FS-45v.11381.11381.5.0.dta	5	2469.33	5.53515e-05	0.000116531	-0.000234	-0.094763	0.000161856	3.69814e-06
	4	mice-tumour-7-F16-1-ex2_FS-45v.11350.11350.5.0.dta	5	2469.33	0.000505963	0.102415	0.001426	0.577485	0.00111378	0.000373907
384	HFKDVK(3)-MFPLAR(1)	1644.89	null	NP_001073918 GeneID:1763 DNA2(864)-NP_570972 GeneID:170712 COX7B2(2)/	Inter-Protein							NP_001073918	GeneID:1763	DNA2(864)	NP_570972	GeneID:170712	COX7B2(2)
	1	mice-tumour-7-F2-2-ex2-_FS-45v.6987.6987.4.0.dta	4	1644.89	1	0.498389	-0.000268	-0.162929	1	0.00789451
385	HGEVCPAGWKPGSETIIPDPAGKLK(23)-YFDKLN(4)	3580.81	Carbamidomethyl[C](5)	NP_006397 GeneID:10549 PRDX4(263)-NP_006397 GeneID:10549 PRDX4(269)/	Intra-Protein							NP_006397	GeneID:10549	PRDX4(263)	NP_006397	GeneID:10549	PRDX4(269)
	1	mice-tumour-7-F18-3-ex2_FS-45v.23019.23019.5.1.dta	5	3580.82	0.0112214	6.54411e-09	0.001598	0.446267	3.88764e-06	0.00452213
	2	mice-tumour-7-F18-3-ex2_FS-45v.22988.22988.4.1.dta	4	3580.81	0.00388904	2.81196e-08	-0.005041	-1.40778	9.37257e-10	0.00138247
	3	mice-tumour-7-F18-3-ex2_FS-45v.23065.23065.4.1.dta	4	3580.81	0.0193301	1.07757e-06	-0.004491	-1.25418	1.61335e-07	0.00790516
	4	mice-tumour-7-F19-3-ex2_FS-45v.23023.23023.4.0.dta	4	3580.8	0.189005	0.0482765	-0.012564	-3.5087	1	0.0270881
	5	mice-tumour-7-F18-1-ex2_FS-45v.23043.23043.4.0.dta	4	3580.81	0.0297103	0.0760603	-0.007479	-2.08863	4.18188e-11	0.0220068
	6	mice-tumour-7-F18-2-ex2_FS-45v.22968.22968.4.0.dta	4	3580.8	0.00458304	0.0804987	-0.011523	-3.21798	1.5943e-06	0.00292853
	7	mice-tumour-7-F18-2-ex2_FS-45v.23003.23003.4.0.dta	4	3580.8	0.013847	0.118358	-0.011833	-3.30456	3.8837e-11	0.0192259
	8	mice-tumour-7-F18-1-ex2_FS-45v.23087.23087.4.1.dta	4	3580.81	0.00963511	0.149964	-0.007479	-2.08863	2.66953e-08	0.00348419
386	HHEEEIVHHKK(10)-LQKEIER(3)	2475.31	null	NP_057395 GeneID:93974 ATP5IF1(82)-NP_057395 GeneID:93974 ATP5IF1(90)/	Intra-Protein							NP_057395	GeneID:93974	ATP5IF1(82)	NP_057395	GeneID:93974	ATP5IF1(90)
	1	mice-tumour-7-F18-3-ex2_FS-65v.2310.2310.5.2.dta	5	2475.3	0.00448751	0.13136	-0.006488	-2.62109	2.83454e-06	0.000994224
387	HKLVSDGQALPEMEIHLQTNAEK(2)-SLYSEKEVFIR(6)	4096.11	null	NP_057376 GeneID:10131 TRAP1(130)-NP_057376 GeneID:10131 TRAP1(109)/NP_057376 GeneID:10131 TRAP1(130)-NP_001258978 GeneID:10131 TRAP1(56)/NP_001258978 GeneID:10131 TRAP1(77)-NP_057376 GeneID:10131 TRAP1(109)/NP_001258978 GeneID:10131 TRAP1(77)-NP_001258978 GeneID:10131 TRAP1(56)/	Intra-Protein							NP_001258978	GeneID:10131	TRAP1(77)	NP_001258978	GeneID:10131	TRAP1(56)
	1	mice-tumour-7-F20-2-ex2_FS-45v.22813.22813.5.0.dta	5	4096.12	0.00304864	0.00410899	0.019145	4.67395	0.000395669	0.000863427
	2	mice-tumour-7-F20-1-ex2_FS-45v.22955.22955.5.1.dta	5	4096.14	0.0103252	0.594091	0.0348	8.49587	0.087654	0.0356724
388	HKNEMLRVEAEARAR(2)-NTKIICQGFTGK(3)	3313.73	Carbamidomethyl[C](24)	NP_001164006 GeneID:55210 ATAD3A(183)-NP_003840 GeneID:8802 SUCLG1(57)/NP_001164007 GeneID:55210 ATAD3A(104)-NP_003840 GeneID:8802 SUCLG1(57)/NP_060658 GeneID:55210 ATAD3A(231)-NP_003840 GeneID:8802 SUCLG1(57)/	Inter-Protein							NP_001164006	GeneID:55210	ATAD3A(183)	NP_003840	GeneID:8802	SUCLG1(57)
	1	mice-tumour-7-F11-3-ex2_FS-45v.27749.27749.4.0.dta	4	3313.73	1	0.539534	-0.000351	-0.105923	1	3.68447e-05
389	HKTGPNLHGLFGR(2)-MGDVEKGKK(6)	2620.37	Acetyl[ProteinN-term](16);Oxidation[M](17)	NP_061820 GeneID:54205 CYCS(28)-NP_061820 GeneID:54205 CYCS(6)/	Intra-Protein							NP_061820	GeneID:54205	CYCS(28)	NP_061820	GeneID:54205	CYCS(6)
	1	mice-tumour-7-F10-3-ex2_FS-65v.15237.15237.6.2.dta	6	2620.36	1	0.231655	-0.004973	-1.89783	0.0247168	1
390	HLKVEEYITPEK(3)-IMGKEIEAEAQR(4)	3013.55	Oxidation[M](17)	NP_006850 GeneID:11019 LIAS(318)-NP_001257376 GeneID:37 ACADVL(16)/NP_001265519 GeneID:11019 LIAS(275)-NP_001257376 GeneID:37 ACADVL(16)/	Inter-Protein							NP_001265519	GeneID:11019	LIAS(275)	NP_001257376	GeneID:37	ACADVL(16)
	1	mice-tumour-7-F15-1-ex2_FS-45V.19312.19312.4.3.dta	4	3013.56	1	0.526683	0.001932	0.641103	1	1
391	HNKMMK(3)-ENQLAK(1)	1627.83	null	NP_001137407 GeneID:54677 CROT(520)-NP_001137407 GeneID:54677 CROT(2)/NP_001137407 GeneID:54677 CROT(520)-NP_066974 GeneID:54677 CROT(2)/NP_001137407 GeneID:54677 CROT(520)-NP_001230674 GeneID:54677 CROT(2)/NP_066974 GeneID:54677 CROT(492)-NP_001137407 GeneID:54677 CROT(2)/NP_066974 GeneID:54677 CROT(492)-NP_066974 GeneID:54677 CROT(2)/NP_066974 GeneID:54677 CROT(492)-NP_001230674 GeneID:54677 CR…	Intra-Protein							NP_001137407	GeneID:54677	CROT(520)	NP_001137407	GeneID:54677	CROT(2)
	1	mice-tumour-7-F11-1-ex2_FS-45v.5678.5678.3.0.dta	3	1627.81	0.355232	0.211755	-0.016394	-10.0711	0.664423	0.0104174
	2	mice-tumour-7-F11-2-ex2_FS-45v.5656.5656.3.0.dta	3	1627.81	0.989912	0.619495	-0.014851	-9.12319	1	0.0820543
392	HVDLLEVAQETDGFSGSDLKEMCR(20)-TLIAKATAK(5)	3789.9	Carbamidomethyl[C](23)	NP_116199 GeneID:84896 ATAD1(300)-NP_116199 GeneID:84896 ATAD1(144)/	Intra-Protein							NP_116199	GeneID:84896	ATAD1(300)	NP_116199	GeneID:84896	ATAD1(144)
	1	mice-tumour-7-F20-2-ex2_FS-45v.24926.24926.4.2.dta	4	3789.87	4.20472e-08	4.97038e-05	-0.031858	-8.40602	2.50505e-14	5.24753e-08
	2	mice-tumour-7-F20-3-ex2_FS-45v.24948.24948.4.2.dta	4	3789.88	4.15704e-09	0.000232593	-0.027	-7.12419	7.94557e-08	8.45395e-10
	3	mice-tumour-7-F20-3-ex2_FS-45v.24979.24979.4.1.dta	4	3789.88	0.111418	0.0711452	-0.025825	-6.81416	0.00567562	0.181166
393	HVVFGHVKEGMDVVK(8)-KIESFGSK(1)	2713.44	null	NP_005720 GeneID:10105 PPIF(175)-NP_005720 GeneID:10105 PPIF(183)/	Intra-Protein							NP_005720	GeneID:10105	PPIF(175)	NP_005720	GeneID:10105	PPIF(183)
	1	mice-tumour-7-F16-2-ex2_FS-65v.14202.14202.4.2.dta	4	2713.43	1.29204e-08	4.47533e-05	-0.004045	-1.49073	3.52083e-05	2.08022e-09
	2	mice-tumour-7-F16-3-ex2_FS-65v.14097.14097.5.0.dta	5	2713.44	7.50177e-07	0.000212712	-0.001447	-0.533272	6.36302e-06	1.04286e-09
	3	mice-tumour-7-F16-2-ex2_FS-65v.14272.14272.5.2.dta	5	2713.43	0.00177811	0.00149357	-0.005708	-2.1036	0.00800822	0.00248768
	4	mice-tumour-7-F16-1-ex2_FS-65v.14286.14286.5.3.dta	5	2713.44	0.00326651	0.0152249	-0.002959	-1.0905	0.110785	0.00289959
	5	mice-tumour-7-F16-1-ex2_FS-65v.14421.14421.4.0.dta	4	2713.44	0.184307	0.274241	-0.001864	-0.686951	0.184221	0.0116254
	6	mice-tumour-7-F16-2-ex2_FS-65v.14222.14222.5.1.dta	5	2713.43	0.102141	0.279253	-0.005103	-1.88064	0.461692	0.069094
394	HVVFGHVKEGMDVVK(8)-VVLELKADVVPK(6)	3127.76	null	NP_005720 GeneID:10105 PPIF(175)-NP_005720 GeneID:10105 PPIF(67)/	Intra-Protein							NP_005720	GeneID:10105	PPIF(175)	NP_005720	GeneID:10105	PPIF(67)
	1	mice-tumour-7-F18-1-ex2_FS-65v.22300.22300.5.1.dta	5	3127.75	0.00427578	0.000260403	-0.011553	-3.6937	0.000731765	1.1952e-05
	2	mice-tumour-7-F18-1-ex2_FS-65v.22259.22259.5.1.dta	5	3127.75	0.0426996	0.0029064	-0.011553	-3.6937	0.0140457	0.0557525
	3	mice-tumour-7-F18-3-ex2_FS-65v.22191.22191.5.1.dta	5	3127.74	0.00145839	0.00896386	-0.016013	-5.11964	0.02063	0.0196768
	4	mice-tumour-7-F18-3-ex2_FS-65v.22172.22172.5.1.dta	5	3127.74	0.0216329	0.0111851	-0.016013	-5.11964	0.0202133	0.0577298
	5	mice-tumour-7-F19-1-ex2_FS-65v.21740.21740.5.0.dta	5	3127.75	1	0.0309867	-0.0097	-3.10126	1	0.526133
395	HVVQSISTQQEKETIAK(12)-CIADLKLLAK(6)	3207.77	Carbamidomethyl[C](21)	NP_001679 GeneID:515 ATP5PB(233)-NP_001679 GeneID:515 ATP5PB(244)/	Intra-Protein							NP_001679	GeneID:515	ATP5PB(233)	NP_001679	GeneID:515	ATP5PB(244)
	1	mice-tumour-7-F17-2-ex2_FS-45v.18193.18193.4.0.dta	4	3207.76	2.60464e-07	0.000693379	-0.003611	-1.12571	7.11072e-11	5.69666e-08
	2	mice-tumour-7-F17-3-ex2_FS-45v.18028.18028.4.0.dta	4	3207.76	3.12238e-08	0.000916108	-0.009649	-3.00801	4.17264e-13	1.87147e-07
	3	mice-tumour-7-F17-2-ex2_FS-45v.18122.18122.4.0.dta	4	3207.76	1.6355e-05	0.000980693	-0.003288	-1.02501	9.44459e-11	1.46278e-05
	4	mice-tumour-7-F17-3-ex2_FS-45v.18114.18114.3.0.dta	3	3207.76	0.000214398	0.00660002	-0.004663	-1.45366	2.92172e-05	1.06337e-05
	5	mice-tumour-7-F17-1-ex2_FS-45v.17999.17999.4.1.dta	4	3207.76	4.86123e-06	0.0119277	-0.007351	-2.29163	5.60324e-09	1.84884e-06
	6	mice-tumour-7-F17-1-ex2_FS-45v.18054.18054.4.0.dta	4	3207.76	2.60212e-09	0.0192318	-0.007351	-2.29163	3.12447e-11	8.87145e-09
	7	mice-tumour-7-F17-2-ex2_FS-45v.18162.18162.5.2.dta	5	3207.76	0.00121466	0.0419481	-0.004092	-1.27565	3.45623e-05	0.000782211
396	HVVQSISTQQEKETIAK(12)-KAQAQPVM(1)	2935.56	null	NP_001679 GeneID:515 ATP5PB(233)-NP_001679 GeneID:515 ATP5PB(249)/	Intra-Protein							NP_001679	GeneID:515	ATP5PB(233)	NP_001679	GeneID:515	ATP5PB(249)
	1	mice-tumour-7-F10-3-ex2_FS-45v.10484.10484.3.1.dta	3	2935.56	0.419063	0.000156073	0.000403	0.137282	1	0.13688
	2	mice-tumour-7-F10-1-ex2_FS-45v.10572.10572.3.0.dta	3	2935.55	0.00018145	0.0218667	-0.00869	-2.96026	1	1.96349e-07
397	HYKTDFDKNK(3)-DGDEMTR(1)	2256.02	null	NP_002159 GeneID:3418 IDH2(275)-NP_001276839 GeneID:3418 IDH2(2)/NP_001276839 GeneID:3418 IDH2(223)-NP_001276839 GeneID:3418 IDH2(2)/	Intra-Protein							NP_001276839	GeneID:3418	IDH2(223)	NP_001276839	GeneID:3418	IDH2(2)
	1	mice-tumour-7-F16-1-ex2_FS-45v.19308.19308.2.1.dta	2	2256	0.30001	0.546166	-0.020619	-9.13953	0.037741	0.294887
398	IADKEVTIK(4)-QVDHLIKK(7)	2134.25	null	NP_055873 GeneID:23078 VWA8(399)-NP_112162 GeneID:9238 TBRG4(77)/NP_055873 GeneID:23078 VWA8(399)-NP_004740 GeneID:9238 TBRG4(77)/NP_055873 GeneID:23078 VWA8(399)-NP_954573 GeneID:9238 TBRG4(77)/NP_055873 GeneID:23078 VWA8(399)-NP_001248763 GeneID:9238 TBRG4(88)/NP_001009814 GeneID:23078 VWA8(399)-NP_112162 GeneID:9238 TBRG4(77)/NP_001009814 GeneID:23078 VWA8(399)-NP_004740 GeneID:9238 TBRG4(77)/…	Inter-Protein							NP_055873	GeneID:23078	VWA8(399)	NP_004740	GeneID:9238	TBRG4(77)
	1	mice-tumour-7-F6-3-ex2_FS-65v.12780.12780.4.1.dta	4	2134.25	0.19496	0.29674	-0.002755	-1.29085	0.400552	0.00152137
399	IAGTNKGITALQADIK(6)-KEILQIMNK(1)	2867.63	null	NP_149100 GeneID:87178 PNPT1(552)-NP_149100 GeneID:87178 PNPT1(583)/	Intra-Protein							NP_149100	GeneID:87178	PNPT1(552)	NP_149100	GeneID:87178	PNPT1(583)
	1	mice-tumour-7-F14-2-ex2_FS-65V.24948.24948.4.1.dta	4	2867.62	1	0.293737	-0.01137	-3.96495	1	0.000754422
400	IALGIPLPEIKNVVSGK(11)-KELSEPSSTR(1)	3018.71	null	NP_001116105 GeneID:1373 CPS1(757)-NP_001116105 GeneID:1373 CPS1(847)/NP_001116105 GeneID:1373 CPS1(757)-NP_001866 GeneID:1373 CPS1(841)/NP_001116105 GeneID:1373 CPS1(757)-NP_001116106 GeneID:1373 CPS1(390)/NP_001866 GeneID:1373 CPS1(751)-NP_001116105 GeneID:1373 CPS1(847)/NP_001866 GeneID:1373 CPS1(751)-NP_001866 GeneID:1373 CPS1(841)/NP_001866 GeneID:1373 CPS1(751)-NP_001116106 GeneID:1373 CPS1…	Intra-Protein							NP_001866	GeneID:1373	CPS1(751)	NP_001866	GeneID:1373	CPS1(841)
	1	mice-tumour-7-F18-2-ex2_FS-65v.29811.29811.4.1.dta	4	3018.7	0.00712023	1.11775e-05	-0.00706	-2.33875	0.145586	0.00077477
401	IAPETAVKFWAYEQYK(8)-KLLTEEGQK(1)	3126.64	null	NP_037518 GeneID:29957 SLC25A24(268)-NP_037518 GeneID:29957 SLC25A24(277)/NP_037518 GeneID:29957 SLC25A24(268)-NP_998816 GeneID:29957 SLC25A24(258)/NP_998816 GeneID:29957 SLC25A24(249)-NP_037518 GeneID:29957 SLC25A24(277)/NP_998816 GeneID:29957 SLC25A24(249)-NP_998816 GeneID:29957 SLC25A24(258)/	Intra-Protein							NP_037518	GeneID:29957	SLC25A24(268)	NP_037518	GeneID:29957	SLC25A24(277)
	1	mice-tumour-7-F19-2-ex2_FS-65v.24952.24952.4.2.dta	4	3126.65	0.000540244	0.00146642	0.007716	2.46782	0.00316304	5.60283e-06
	2	mice-tumour-7-F19-1-ex2_FS-65v.24986.24986.4.2.dta	4	3126.65	0.521831	0.00191489	0.006275	2.00695	1	0.171244
	3	mice-tumour-7-F19-3-ex2_FS-65v.24963.24963.4.1.dta	4	3126.64	1	0.00856899	-0.003862	-1.23519	0.00762927	1
402	IATGSFLKR(8)-NPGVKEGYK(5)	2121.17	null	NP_001072992 GeneID:10606 PAICS(110)-NP_001072992 GeneID:10606 PAICS(116)/NP_001072992 GeneID:10606 PAICS(110)-NP_001072993 GeneID:10606 PAICS(123)/NP_001072992 GeneID:10606 PAICS(110)-NP_006443 GeneID:10606 PAICS(116)/NP_001072993 GeneID:10606 PAICS(117)-NP_001072992 GeneID:10606 PAICS(116)/NP_001072993 GeneID:10606 PAICS(117)-NP_001072993 GeneID:10606 PAICS(123)/NP_001072993 GeneID:10606 PAICS(…	Intra-Protein							NP_001072993	GeneID:10606	PAICS(117)	NP_001072993	GeneID:10606	PAICS(123)
	1	mice-tumour-7-F5-2-ex2_FS-65v.12792.12792.4.2.dta	4	2121.17	0.0372056	4.36528e-05	-0.003781	-1.78251	0.0778723	0.000219918
	2	mice-tumour-7-F5-3-ex2_FS-65v.12871.12871.4.0.dta	4	2121.17	0.028696	5.00314e-05	-0.00277	-1.30588	0.122437	3.13384e-05
	3	mice-tumour-7-F5-2-ex2_FS-65v.12826.12826.4.1.dta	4	2121.17	0.00301165	0.000102906	-0.003746	-1.76601	0.0224219	0.00578738
	4	mice-tumour-7-F5-3-ex2_FS-65v.12867.12867.3.0.dta	3	2121.16	0.0031548	0.000106903	-0.005317	-2.50664	0.00957143	2.92438e-06
	5	mice-tumour-7-F5-1-ex2_FS-65v.12858.12858.4.1.dta	4	2121.17	0.0737877	0.0296317	-0.004222	-1.99041	0.210897	0.0015639
	6	mice-tumour-7-F5-1-ex2_FS-65v.12882.12882.4.1.dta	4	2121.17	0.0140314	0.0416249	-0.004209	-1.98428	0.0274943	1.4333e-05
	7	mice-tumour-7-F5-1-ex2_FS-65v.12836.12836.4.1.dta	4	2121.17	0.0100991	0.0489299	-0.004362	-2.05641	0.00704891	0.000265526
403	IDEKKNDHTYR(4)-CAGSSLFLKK(9)	2666.36	Carbamidomethyl[C](15)	NP_954635 GeneID:211 ALAS1(210)-NP_525022 GeneID:10350 ABCA9(704)/NP_000679 GeneID:211 ALAS1(210)-NP_525022 GeneID:10350 ABCA9(704)/	Inter-Protein							NP_954635	GeneID:211	ALAS1(210)	NP_525022	GeneID:10350	ABCA9(704)
	1	mice-tumour-7-F19-1-ex2_FS-45v.22136.22136.4.4.dta	4	2666.36	0.88102	0.200802	-0.00545	-2.04399	0.0430508	1
404	IDEYDYSKPIQGQQK(8)-EDYKVR(4)	2758.36	null	NP_004159 GeneID:6389 SDHA(608)-NP_004159 GeneID:6389 SDHA(598)/	Intra-Protein							NP_004159	GeneID:6389	SDHA(608)	NP_004159	GeneID:6389	SDHA(598)
	1	mice-tumour-7-F19-1-ex2_FS-65v.11858.11858.4.0.dta	4	2758.35	0.0806593	0.00149083	-0.008895	-3.22475	0.00139836	0.0220067
	2	mice-tumour-7-F19-3-ex2_FS-65v.11785.11785.4.0.dta	4	2758.35	0.00844624	0.00458577	-0.007501	-2.71937	4.82241e-07	0.00507345
	3	mice-tumour-7-F19-2-ex2_FS-65v.11767.11767.4.0.dta	4	2758.35	0.00760035	0.00572842	-0.006042	-2.19043	1.0335e-05	0.00193307
	4	mice-tumour-7-F19-1-ex2_FS-65v.11824.11824.4.0.dta	4	2758.35	0.20098	0.021715	-0.008895	-3.22475	1.04885e-06	0.0471761
	5	mice-tumour-7-F19-2-ex2_FS-65v.11738.11738.4.1.dta	4	2758.35	1	0.20107	-0.006042	-2.19043	0.00301183	1
405	IDEYDYSKPIQGQQK(8)-KPFEEHWR(1)	3077.5	null	NP_004159 GeneID:6389 SDHA(608)-NP_004159 GeneID:6389 SDHA(616)/	Intra-Protein							NP_004159	GeneID:6389	SDHA(608)	NP_004159	GeneID:6389	SDHA(616)
	1	mice-tumour-7-F19-1-ex2_FS-45v.13817.13817.5.2.dta	5	3077.5	2.70842e-11	3.47812e-05	-0.004815	-1.56458	8.58093e-08	5.15506e-08
	2	mice-tumour-7-F19-1-ex2_FS-45v.13827.13827.3.0.dta	3	3077.5	1	0.000123734	0.004365	1.41836	1	1
	3	mice-tumour-7-F19-3-ex2_FS-45v.13698.13698.4.2.dta	4	3077.49	4.50391e-12	0.00139902	-0.006674	-2.16864	0.00224402	3.54332e-09
	4	mice-tumour-7-F19-2-ex2_FS-45v.13761.13761.5.0.dta	5	3077.49	1.99032e-11	0.0132436	-0.005438	-1.76702	1.53672e-09	4.57564e-08
	5	mice-tumour-7-F19-2-ex2_FS-45v.13772.13772.3.0.dta	3	3077.5	1	0.025374	0.001489	0.483834	1	1
406	IEAACFATIKDGK(10)-SLTKDLGGNAK(4)	2664.39	Carbamidomethyl[C](5)	NP_005521 GeneID:3419 IDH3A(336)-NP_005521 GeneID:3419 IDH3A(343)/	Intra-Protein							NP_005521	GeneID:3419	IDH3A(336)	NP_005521	GeneID:3419	IDH3A(343)
	1	mice-tumour-7-F14-2-ex2_FS-65V.19534.19534.4.1.dta	4	2664.39	7.2489e-14	1.3209e-05	-0.002124	-0.79718	1.14637e-09	3.45051e-11
	2	mice-tumour-7-F14-3-ex2_FS-65V.19467.19467.4.1.dta	4	2664.39	1.38961e-11	0.000163938	-0.002916	-1.09443	7.28842e-11	1.62922e-13
	3	mice-tumour-7-F14-1-ex2_FS-45V.18106.18106.3.0.dta	3	2664.39	1	0.00867205	0.003698	1.38793	1	1
407	IEFEGQPVDFVDPNKQNLIAEVSTK(15)-DKGTMLGK(2)	3803.94	null	NP_001116105 GeneID:1373 CPS1(203)-NP_001116105 GeneID:1373 CPS1(182)/NP_001116105 GeneID:1373 CPS1(203)-NP_001866 GeneID:1373 CPS1(176)/NP_001866 GeneID:1373 CPS1(197)-NP_001116105 GeneID:1373 CPS1(182)/NP_001866 GeneID:1373 CPS1(197)-NP_001866 GeneID:1373 CPS1(176)/	Intra-Protein							NP_001866	GeneID:1373	CPS1(197)	NP_001866	GeneID:1373	CPS1(176)
	1	mice-tumour-7-F20-2-ex2_FS-65v.29825.29825.4.0.dta	4	3803.93	0.0469986	2.03235e-07	-0.009005	-2.36728	1	0.0196455
	2	mice-tumour-7-F20-3-ex2_FS-65v.29888.29888.4.1.dta	4	3803.93	0.000501429	0.000198773	-0.008408	-2.21034	1	5.98572e-06
	3	mice-tumour-7-F20-1-ex2_FS-45v.28722.28722.4.1.dta	4	3803.93	0.00764796	0.0426905	-0.010691	-2.81051	1.07677e-08	0.00564395
	4	mice-tumour-7-F20-3-ex2_FS-45v.28616.28616.4.2.dta	4	3803.94	0.295572	0.114612	0.002764	0.726615	3.58983e-07	0.338318
	5	mice-tumour-7-F20-1-ex2_FS-45v.28676.28676.4.2.dta	4	3803.94	0.131168	0.127331	-0.000674	-0.177185	8.49543e-11	0.310567
408	IEFEGQPVDFVDPNKQNLIAEVSTK(15)-DVKVYGK(3)	3762.95	null	NP_001116105 GeneID:1373 CPS1(203)-NP_001116105 GeneID:1373 CPS1(216)/NP_001116105 GeneID:1373 CPS1(203)-NP_001866 GeneID:1373 CPS1(210)/NP_001866 GeneID:1373 CPS1(197)-NP_001116105 GeneID:1373 CPS1(216)/NP_001866 GeneID:1373 CPS1(197)-NP_001866 GeneID:1373 CPS1(210)/	Intra-Protein							NP_001866	GeneID:1373	CPS1(197)	NP_001866	GeneID:1373	CPS1(210)
	1	mice-tumour-7-F20-1-ex2_FS-45v.28229.28229.4.0.dta	4	3762.95	0.00101103	0.0895974	0.004752	1.26284	0.000169783	0.0015305
409	IEFEGQPVDFVDPNKQNLIAEVSTK(15)-GNPTKVVAVDCGIK(5)	4412.27	Carbamidomethyl[C](39)	NP_001116105 GeneID:1373 CPS1(203)-NP_001116105 GeneID:1373 CPS1(225)/NP_001116105 GeneID:1373 CPS1(203)-NP_001866 GeneID:1373 CPS1(219)/NP_001866 GeneID:1373 CPS1(197)-NP_001116105 GeneID:1373 CPS1(225)/NP_001866 GeneID:1373 CPS1(197)-NP_001866 GeneID:1373 CPS1(219)/	Intra-Protein							NP_001866	GeneID:1373	CPS1(197)	NP_001866	GeneID:1373	CPS1(219)
	1	mice-tumour-7-F20-3-ex2_FS-45v.28308.28308.4.0.dta	4	4412.26	0.000755746	0.00211151	-0.007496	-1.6989	0.00105518	0.00334945
	2	mice-tumour-7-F20-1-ex2_FS-45v.28345.28345.4.0.dta	4	4412.26	0.00740439	0.074146	-0.006696	-1.51759	1	0.00201716
410	IEFEGQPVDFVDPNKQNLIAEVSTK(15)-MLTKIIR(4)	3829.05	null	NP_001116105 GeneID:1373 CPS1(203)-NP_001116105 GeneID:1373 CPS1(177)/NP_001116105 GeneID:1373 CPS1(203)-NP_001866 GeneID:1373 CPS1(171)/NP_001866 GeneID:1373 CPS1(197)-NP_001116105 GeneID:1373 CPS1(177)/NP_001866 GeneID:1373 CPS1(197)-NP_001866 GeneID:1373 CPS1(171)/	Intra-Protein							NP_001866	GeneID:1373	CPS1(197)	NP_001866	GeneID:1373	CPS1(171)
	1	mice-tumour-7-F20-2-ex2_FS-45v.28984.28984.4.0.dta	4	3829.05	0.0114788	0.000519809	0.001443	0.376856	4.1743e-10	0.101831
	2	mice-tumour-7-F20-3-ex2_FS-45v.29015.29015.4.0.dta	4	3829.04	0.201333	0.255319	-0.001797	-0.469308	1.36931e-07	0.26813
411	IEFEGQPVDFVDPNKQNLIAEVSTK(15)-VVAVDCGIKNNVIR(9)	4511.35	Carbamidomethyl[C](34)	NP_001116105 GeneID:1373 CPS1(203)-NP_001116105 GeneID:1373 CPS1(234)/NP_001116105 GeneID:1373 CPS1(203)-NP_001866 GeneID:1373 CPS1(228)/NP_001866 GeneID:1373 CPS1(197)-NP_001116105 GeneID:1373 CPS1(234)/NP_001866 GeneID:1373 CPS1(197)-NP_001866 GeneID:1373 CPS1(228)/	Intra-Protein							NP_001866	GeneID:1373	CPS1(197)	NP_001866	GeneID:1373	CPS1(228)
	1	mice-tumour-7-F20-3-ex2_FS-45v.28802.28802.4.0.dta	4	4511.35	4.07728e-09	1.78651e-09	0.004405	0.976426	1.69202e-10	9.01137e-12
	2	mice-tumour-7-F20-1-ex2_FS-45v.28844.28844.4.0.dta	4	4511.35	1.4068e-06	0.0213875	-0.000337	-0.0747	1.52126e-16	3.47442e-08
412	IEFEGQPVDFVDPNKQNLIAEVSTK(15)-VYGKGNPTK(4)	3918.02	null	NP_001116105 GeneID:1373 CPS1(203)-NP_001116105 GeneID:1373 CPS1(220)/NP_001116105 GeneID:1373 CPS1(203)-NP_001866 GeneID:1373 CPS1(214)/NP_001866 GeneID:1373 CPS1(197)-NP_001116105 GeneID:1373 CPS1(220)/NP_001866 GeneID:1373 CPS1(197)-NP_001866 GeneID:1373 CPS1(214)/	Intra-Protein							NP_001866	GeneID:1373	CPS1(197)	NP_001866	GeneID:1373	CPS1(214)
	1	mice-tumour-7-F19-3-ex2_FS-45v.26675.26675.4.0.dta	4	3918.02	0.0226794	0.000388061	-0.001797	-0.45865	0.00176241	0.0085233
	2	mice-tumour-7-F19-3-ex2_FS-45v.26710.26710.4.0.dta	4	3918.02	0.163715	0.00094302	-0.001797	-0.45865	0.0134317	0.0618778
	3	mice-tumour-7-F19-1-ex2_FS-45v.26737.26737.4.0.dta	4	3918.02	0.0178951	0.00101662	0.001935	0.493872	0.00187777	0.00624562
	4	mice-tumour-7-F19-3-ex2_FS-45v.26733.26733.4.1.dta	4	3918.02	0.00498241	0.00103459	-0.001797	-0.45865	0.00653089	0.0677
	5	mice-tumour-7-F19-2-ex2_FS-45v.26708.26708.4.0.dta	4	3918.02	0.000836648	0.00306533	0.001013	0.258549	6.51412e-05	0.00459051
	6	mice-tumour-7-F19-2-ex2_FS-45v.26773.26773.4.1.dta	4	3918.02	0.495773	0.0473744	0.001013	0.258549	1	0.558948
	7	mice-tumour-7-F19-1-ex2_FS-45v.26780.26780.4.1.dta	4	3918.02	0.054919	0.0882461	0.001935	0.493872	0.527089	1
	8	mice-tumour-7-F20-3-ex2_FS-45v.26649.26649.4.1.dta	4	3918.02	0.00190945	0.176532	-0.000894	-0.228177	0.00513407	0.00672151
413	IEFEGQPVDFVDPNKQNLIAEVSTKDVK(15)-VYGKGNPTK(4)	4260.21	null	NP_001116105 GeneID:1373 CPS1(203)-NP_001116105 GeneID:1373 CPS1(220)/NP_001116105 GeneID:1373 CPS1(203)-NP_001866 GeneID:1373 CPS1(214)/NP_001866 GeneID:1373 CPS1(197)-NP_001116105 GeneID:1373 CPS1(220)/NP_001866 GeneID:1373 CPS1(197)-NP_001866 GeneID:1373 CPS1(214)/	Intra-Protein							NP_001866	GeneID:1373	CPS1(197)	NP_001866	GeneID:1373	CPS1(214)
	1	mice-tumour-7-F20-1-ex2_FS-45v.24507.24507.4.1.dta	4	4260.22	1	0.296071	0.012211	2.86629	1	1
414	IEFEGQPVDFVDPNKQNLIAEVSTKDVK(25)-DKGTMLGK(2)	4146.13	null	NP_001116105 GeneID:1373 CPS1(213)-NP_001116105 GeneID:1373 CPS1(182)/NP_001116105 GeneID:1373 CPS1(213)-NP_001866 GeneID:1373 CPS1(176)/NP_001866 GeneID:1373 CPS1(207)-NP_001116105 GeneID:1373 CPS1(182)/NP_001866 GeneID:1373 CPS1(207)-NP_001866 GeneID:1373 CPS1(176)/	Intra-Protein							NP_001866	GeneID:1373	CPS1(207)	NP_001866	GeneID:1373	CPS1(176)
	1	mice-tumour-7-F20-2-ex2_FS-65v.28133.28133.5.0.dta	5	4146.12	1.75086e-10	1.22215e-05	-0.007405	-1.786	1	5.9734e-08
	2	mice-tumour-7-F20-3-ex2_FS-65v.28233.28233.5.0.dta	5	4146.12	1	0.0085256	-0.007001	-1.68856	1	1
	3	mice-tumour-7-F20-1-ex2_FS-65v.28256.28256.5.0.dta	5	4146.12	2.97296e-05	0.153474	-0.015801	-3.81102	1	3.34069e-05
415	IESFGSKSGR(7)-EGMDVVKK(7)	2110.08	null	NP_005720 GeneID:10105 PPIF(190)-NP_005720 GeneID:10105 PPIF(182)/	Intra-Protein							NP_005720	GeneID:10105	PPIF(190)	NP_005720	GeneID:10105	PPIF(182)
	1	mice-tumour-7-F11-3-ex2_FS-65v.12541.12541.3.1.dta	3	2110.08	0.000390347	0.0254374	-0.002301	-1.09048	3.7704e-05	0.00035726
	2	mice-tumour-7-F11-2-ex2_FS-65v.12717.12717.3.0.dta	3	2110.08	0.000758297	0.0554697	-0.005745	-2.72264	4.63386e-08	0.000139488
	3	mice-tumour-7-F11-1-ex2_FS-65v.12832.12832.3.0.dta	3	2110.08	0.13359	0.107375	-0.002881	-1.36535	0.0143856	0.0991687
416	IESLAKSLEDALR(6)-LAQQEKQEQVK(6)	2910.58	null	NP_001093640 GeneID:10989 IMMT(211)-NP_001093640 GeneID:10989 IMMT(200)/NP_001093640 GeneID:10989 IMMT(211)-NP_006830 GeneID:10989 IMMT(211)/NP_001093640 GeneID:10989 IMMT(211)-NP_001093639 GeneID:10989 IMMT(210)/NP_006830 GeneID:10989 IMMT(222)-NP_001093640 GeneID:10989 IMMT(200)/NP_006830 GeneID:10989 IMMT(222)-NP_006830 GeneID:10989 IMMT(211)/NP_006830 GeneID:10989 IMMT(222)-NP_001093639 GeneI…	Intra-Protein							NP_006830	GeneID:10989	IMMT(222)	NP_006830	GeneID:10989	IMMT(211)
	1	mice-tumour-7-F19-2-ex2_FS-45v.20501.20501.4.0.dta	4	2910.57	0.00355582	0.0111886	-0.003305	-1.13551	0.000842402	4.14808e-05
417	IEYDTFGELKVPNDK(10)-STMNFKIGGVTER(6)	3344.67	null	NP_000134 GeneID:2271 FH(61)-NP_000134 GeneID:2271 FH(80)/	Intra-Protein							NP_000134	GeneID:2271	FH(61)	NP_000134	GeneID:2271	FH(80)
	1	mice-tumour-7-F19-1-ex2_FS-45v.24212.24212.4.2.dta	4	3344.67	0.00498347	1.3109e-05	-0.005278	-1.57803	2.22654e-08	0.000174354
	2	mice-tumour-7-F19-3-ex2_FS-45v.24142.24142.4.0.dta	4	3344.67	6.98769e-05	7.37807e-05	-0.002487	-0.743571	3.03594e-08	2.18161e-05
	3	mice-tumour-7-F19-2-ex2_FS-45v.24193.24193.4.1.dta	4	3344.67	0.000361887	0.00485022	-0.001442	-0.431133	1.53813e-06	9.19321e-05
	4	mice-tumour-7-F19-2-ex2_FS-45v.24258.24258.4.0.dta	4	3344.67	1	0.048142	-0.001038	-0.310344	0.17106	1
418	IGEKYVDMSVK(4)-IQKLGR(3)	2120.18	null	NP_001688 GeneID:539 ATP5PO(192)-NP_001688 GeneID:539 ATP5PO(204)/	Intra-Protein							NP_001688	GeneID:539	ATP5PO(192)	NP_001688	GeneID:539	ATP5PO(204)
	1	mice-tumour-7-F10-3-ex2_FS-65v.16495.16495.3.0.dta	3	2120.17	1.48918e-05	6.36997e-07	-0.00678	-3.19784	1.00576e-27	9.918e-07
	2	mice-tumour-7-F10-3-ex2_FS-65v.16499.16499.4.0.dta	4	2120.18	0.00338099	1.91939e-05	-0.001337	-0.630607	1.24035e-09	0.0019005
	3	mice-tumour-7-F10-2-ex2_FS-65v.16542.16542.4.0.dta	4	2120.18	0.0119153	9.51967e-05	-0.001492	-0.703714	2.50496e-08	0.00540041
	4	mice-tumour-7-F10-2-ex2_FS-65v.16477.16477.4.0.dta	4	2120.18	0.00417002	0.000853509	-0.001697	-0.800404	1.41304e-09	0.00231779
	5	mice-tumour-7-F10-2-ex2_FS-65v.16501.16501.4.0.dta	4	2120.18	0.0995715	0.000998886	-0.001579	-0.744749	0.00462459	0.0758044
	6	mice-tumour-7-F10-1-ex2_FS-65v.16678.16678.4.0.dta	4	2120.18	0.00894653	0.00169791	-0.000918	-0.432982	1.918e-08	0.00685773
	7	mice-tumour-7-F10-1-ex2_FS-65v.16636.16636.4.0.dta	4	2120.18	0.00167022	0.00213598	-0.00104	-0.490525	2.14444e-08	0.00115435
	8	mice-tumour-7-F10-1-ex2_FS-65v.16641.16641.3.0.dta	3	2120.17	1.63219e-08	0.0114778	-0.010816	-5.10146	1.11945e-21	1.75102e-08
	9	mice-tumour-7-F10-1-ex2_FS-65v.16687.16687.4.0.dta	4	2120.18	0.0326028	0.0178136	-0.000918	-0.432982	1.14875e-05	0.0176319
	10	mice-tumour-7-F10-3-ex2_FS-65v.16606.16606.4.0.dta	4	2120.18	1	0.0890589	-0.002002	-0.94426	0.841193	0.976924
	11	mice-tumour-7-F10-2-ex2_FS-45v.14350.14350.4.1.dta	4	2120.17	0.0240995	0.217794	-0.004144	-1.95455	2.80828e-05	0.0279209
	12	mice-tumour-7-F10-1-ex2_FS-45v.14449.14449.4.4.dta	4	2120.17	0.0450674	0.307345	-0.003645	-1.7192	0.0010042	0.0431073
419	IGEKYVDMSVK(4)-KAQAQPVM(1)	2278.18	null	NP_001688 GeneID:539 ATP5PO(192)-NP_001679 GeneID:515 ATP5PB(249)/	Inter-Protein							NP_001688	GeneID:539	ATP5PO(192)	NP_001679	GeneID:515	ATP5PB(249)
	1	mice-tumour-7-F13-1-ex2_FS-65V.18297.18297.3.0.dta	3	2278.17	3.37822e-05	0.343803	-0.007092	-3.11301	7.37029e-06	1.02851e-06
420	IGIEIIKR(7)-EGFEKISK(5)	2016.17	null	NP_002147 GeneID:3329 HSPD1(469)-NP_002147 GeneID:3329 HSPD1(130)/NP_002147 GeneID:3329 HSPD1(469)-NP_955472 GeneID:3329 HSPD1(130)/NP_955472 GeneID:3329 HSPD1(469)-NP_002147 GeneID:3329 HSPD1(130)/NP_955472 GeneID:3329 HSPD1(469)-NP_955472 GeneID:3329 HSPD1(130)/	Intra-Protein							NP_002147	GeneID:3329	HSPD1(469)	NP_002147	GeneID:3329	HSPD1(130)
	1	mice-tumour-7-F14-3-ex2_FS-65V.21293.21293.3.0.dta	3	2016.17	6.56283e-06	0.0174265	-0.005203	-2.58063	2.13696e-05	0.00136221
	2	mice-tumour-7-F14-2-ex2_FS-65V.21400.21400.3.1.dta	3	2016.17	0.0420458	0.0711168	-0.001883	-0.933947	0.138507	0.00109846
	3	mice-tumour-7-F17-2-ex2_FS-65v.20368.20368.4.0.dta	4	2016.17	0.00405301	0.392671	-0.002941	-1.4587	0.00201058	0.00108558
421	IGIEIIKR(7)-GDKAQIEK(3)	1967.15	null	NP_002147 GeneID:3329 HSPD1(469)-NP_002147 GeneID:3329 HSPD1(364)/NP_002147 GeneID:3329 HSPD1(469)-NP_955472 GeneID:3329 HSPD1(364)/NP_955472 GeneID:3329 HSPD1(469)-NP_002147 GeneID:3329 HSPD1(364)/NP_955472 GeneID:3329 HSPD1(469)-NP_955472 GeneID:3329 HSPD1(364)/	Intra-Protein							NP_002147	GeneID:3329	HSPD1(469)	NP_002147	GeneID:3329	HSPD1(364)
	1	mice-tumour-7-F14-2-ex2_FS-65V.16899.16899.4.0.dta	4	1967.15	0.0262165	0.00581854	-0.001244	-0.632386	0.0165034	0.00100252
	2	mice-tumour-7-F14-3-ex2_FS-65V.16864.16864.4.1.dta	4	1967.15	0.00469939	0.0229522	-0.003588	-1.82395	0.0037968	0.000222319
	3	mice-tumour-7-F14-1-ex2_FS-65V.16951.16951.4.0.dta	4	1967.15	0.197205	0.571761	-0.000304	-0.154538	0.360191	0.000534415
422	IGSSMKSVGEVMAIGR(6)-AKEIGFSDK(2)	2753.42	null	NP_001116105 GeneID:1373 CPS1(799)-NP_001116105 GeneID:1373 CPS1(914)/NP_001116105 GeneID:1373 CPS1(799)-NP_001866 GeneID:1373 CPS1(908)/NP_001116105 GeneID:1373 CPS1(799)-NP_001116106 GeneID:1373 CPS1(457)/NP_001866 GeneID:1373 CPS1(793)-NP_001116105 GeneID:1373 CPS1(914)/NP_001866 GeneID:1373 CPS1(793)-NP_001866 GeneID:1373 CPS1(908)/NP_001866 GeneID:1373 CPS1(793)-NP_001116106 GeneID:1373 CPS1…	Intra-Protein							NP_001866	GeneID:1373	CPS1(793)	NP_001866	GeneID:1373	CPS1(908)
	1	mice-tumour-7-F14-2-ex2_FS-65V.23115.23115.4.0.dta	4	2753.42	3.75099e-08	0.00099545	-0.001925	-0.69913	1.83608e-05	2.90978e-06
423	IGSSMKSVGEVMAIGR(6)-KELSEPSSTR(1)	2892.48	null	NP_001116105 GeneID:1373 CPS1(799)-NP_001116105 GeneID:1373 CPS1(847)/NP_001116105 GeneID:1373 CPS1(799)-NP_001866 GeneID:1373 CPS1(841)/NP_001116105 GeneID:1373 CPS1(799)-NP_001116106 GeneID:1373 CPS1(390)/NP_001866 GeneID:1373 CPS1(793)-NP_001116105 GeneID:1373 CPS1(847)/NP_001866 GeneID:1373 CPS1(793)-NP_001866 GeneID:1373 CPS1(841)/NP_001866 GeneID:1373 CPS1(793)-NP_001116106 GeneID:1373 CPS1…	Intra-Protein							NP_001866	GeneID:1373	CPS1(793)	NP_001866	GeneID:1373	CPS1(841)
	1	mice-tumour-7-F12-1-ex2_FS-45v.18162.18162.3.0.dta	3	2892.48	1	0.000269132	-0.003247	-1.12257	0.000183566	1.44351e-06
424	IGSSMKSVGEVMAIGR(6)-LPMNKEWPSNLDLR(5)	3471.78	null	NP_001116105 GeneID:1373 CPS1(799)-NP_001116105 GeneID:1373 CPS1(837)/NP_001116105 GeneID:1373 CPS1(799)-NP_001866 GeneID:1373 CPS1(831)/NP_001116105 GeneID:1373 CPS1(799)-NP_001116106 GeneID:1373 CPS1(380)/NP_001866 GeneID:1373 CPS1(793)-NP_001116105 GeneID:1373 CPS1(837)/NP_001866 GeneID:1373 CPS1(793)-NP_001866 GeneID:1373 CPS1(831)/NP_001866 GeneID:1373 CPS1(793)-NP_001116106 GeneID:1373 CPS1…	Intra-Protein							NP_001866	GeneID:1373	CPS1(793)	NP_001866	GeneID:1373	CPS1(831)
	1	mice-tumour-7-F16-3-ex2_FS-45v.26595.26595.4.0.dta	4	3471.77	1.20528e-09	3.4809e-05	-0.012616	-3.63387	1.8945e-09	1.10529e-11
	2	mice-tumour-7-F16-2-ex2_FS-45v.26531.26531.4.0.dta	4	3471.77	2.00205e-09	0.000808178	-0.006502	-1.87281	9.59661e-10	1.36271e-09
	3	mice-tumour-7-F16-1-ex2_FS-45v.26573.26573.4.0.dta	4	3471.77	5.96907e-11	0.0104333	-0.006245	-1.79879	5.57308e-12	6.50128e-12
425	IGSSMKSVGEVMAIGR(6)-TFEESFQKALR(8)	3114.6	null	NP_001116105 GeneID:1373 CPS1(799)-NP_001116105 GeneID:1373 CPS1(817)/NP_001116105 GeneID:1373 CPS1(799)-NP_001866 GeneID:1373 CPS1(811)/NP_001116105 GeneID:1373 CPS1(799)-NP_001116106 GeneID:1373 CPS1(360)/NP_001866 GeneID:1373 CPS1(793)-NP_001116105 GeneID:1373 CPS1(817)/NP_001866 GeneID:1373 CPS1(793)-NP_001866 GeneID:1373 CPS1(811)/NP_001866 GeneID:1373 CPS1(793)-NP_001116106 GeneID:1373 CPS1…	Intra-Protein							NP_001866	GeneID:1373	CPS1(793)	NP_001866	GeneID:1373	CPS1(811)
	1	mice-tumour-7-F14-1-ex2_FS-45V.25262.25262.4.1.dta	4	3114.59	1.77737e-05	4.70205e-05	-0.005301	-1.70199	1.05602e-09	0.000867861
	2	mice-tumour-7-F14-1-ex2_FS-45V.25272.25272.3.0.dta	3	3114.59	0.030984	0.000350906	-0.005861	-1.88179	1	0.00181146
	3	mice-tumour-7-F14-2-ex2_FS-45V.25128.25128.3.0.dta	3	3114.59	0.00504785	0.000574699	-0.004273	-1.37193	0.0125265	0.0052335
	4	mice-tumour-7-F17-3-ex2_FS-45v.24544.24544.4.4.dta	4	3114.57	3.1422e-05	0.00420323	-0.027316	-8.77032	1.52027e-08	1.57529e-05
	5	mice-tumour-7-F14-3-ex2_FS-45V.25194.25194.4.0.dta	4	3114.59	0.000113016	0.0127053	-0.00144	-0.462339	3.21055e-10	0.000193338
	6	mice-tumour-7-F17-2-ex2_FS-45v.24639.24639.4.1.dta	4	3114.57	5.71974e-05	0.0963765	-0.024154	-7.7551	9.93634e-14	7.14519e-06
426	IHKPDPWLSKFLSRYR(3)-FCSNSKHLLGK(6)	3470.85	Carbamidomethyl[C](21)	NP_001159887 GeneID:1962 EHHADH(495)-NP_076996 GeneID:79072 FASTKD3(606)/NP_001957 GeneID:1962 EHHADH(591)-NP_076996 GeneID:79072 FASTKD3(606)/	Inter-Protein							NP_001159887	GeneID:1962	EHHADH(495)	NP_076996	GeneID:79072	FASTKD3(606)
	1	mice-tumour-7-F3-1-ex2_FS-65v.13203.13203.5.2.dta	5	3470.82	1	0.313887	-0.026852	-7.73643	0.434388	1
427	IHLFDIDVPGKITFQESK(11)-KLAEIR(1)	2953.64	null	NP_064587 GeneID:56954 NIT2(123)-NP_064587 GeneID:56954 NIT2(250)/	Intra-Protein							NP_064587	GeneID:56954	NIT2(123)	NP_064587	GeneID:56954	NIT2(250)
	1	mice-tumour-7-F19-2-ex2_FS-65v.27566.27566.4.0.dta	4	2953.64	0.00362176	0.000126556	0.000137	0.046383	1	0.00773927
	2	mice-tumour-7-F19-1-ex2_FS-65v.27623.27623.4.0.dta	4	2953.63	3.93777e-05	0.000134389	-0.004995	-1.69113	1	1.38914e-06
	3	mice-tumour-7-F19-1-ex2_FS-65v.27729.27729.4.0.dta	4	2953.64	1	0.000718576	-0.001282	-0.434041	1	1
	4	mice-tumour-7-F19-3-ex2_FS-65v.27574.27574.4.0.dta	4	2953.64	3.66464e-05	0.000773795	-0.003526	-1.19378	1	4.77e-06
428	IHTPMEYKGELASYDMR(8)-KLDLFANVVHVK(1)	3560.83	null	NP_008830 GeneID:3420 IDH3B(122)-NP_008830 GeneID:3420 IDH3B(135)/NP_008830 GeneID:3420 IDH3B(122)-NP_777280 GeneID:3420 IDH3B(135)/NP_008830 GeneID:3420 IDH3B(122)-NP_001245313 GeneID:3420 IDH3B(135)/NP_777280 GeneID:3420 IDH3B(122)-NP_008830 GeneID:3420 IDH3B(135)/NP_777280 GeneID:3420 IDH3B(122)-NP_777280 GeneID:3420 IDH3B(135)/NP_777280 GeneID:3420 IDH3B(122)-NP_001245313 GeneID:3420 IDH3B(13…	Intra-Protein							NP_008830	GeneID:3420	IDH3B(122)	NP_008830	GeneID:3420	IDH3B(135)
	1	mice-tumour-7-F19-1-ex2_FS-45v.26292.26292.5.0.dta	5	3560.83	1	0.0668073	0.002036	0.571777	0.0041451	1
429	IIADIFEYTAKHMPK(11)-EVKGLEWR(3)	2946.54	Oxidation[M](13)	NP_000246 GeneID:4594 MMUT(251)-NP_000447 GeneID:6821 SUOX(279)/NP_000246 GeneID:4594 MMUT(251)-NP_001027558 GeneID:6821 SUOX(279)/NP_000246 GeneID:4594 MMUT(251)-NP_001027559 GeneID:6821 SUOX(279)/	Inter-Protein							NP_000246	GeneID:4594	MMUT(251)	NP_000447	GeneID:6821	SUOX(279)
	1	mice-tumour-7-F1-3-ex2_FS-65V.29245.29245.4.0.dta	4	2946.51	1	0.540519	-0.028755	-9.75889	1	1
430	IIAEGANGPTTPEADKIFLER(16)-QLTKSNAPR(4)	3393.8	null	NP_036216 GeneID:2747 GLUD2(415)-NP_036216 GeneID:2747 GLUD2(390)/NP_036216 GeneID:2747 GLUD2(415)-NP_005262 GeneID:2746 GLUD1(390)/NP_005262 GeneID:2746 GLUD1(415)-NP_036216 GeneID:2747 GLUD2(390)/NP_005262 GeneID:2746 GLUD1(415)-NP_005262 GeneID:2746 GLUD1(390)/	Intra-Protein							NP_036216	GeneID:2747	GLUD2(415)	NP_036216	GeneID:2747	GLUD2(390)
												NP_036216	GeneID:2747	GLUD2(415)	NP_005262	GeneID:2746	GLUD1(390)
												NP_005262	GeneID:2746	GLUD1(415)	NP_036216	GeneID:2747	GLUD2(390)
												NP_005262	GeneID:2746	GLUD1(415)	NP_005262	GeneID:2746	GLUD1(390)
	1	mice-tumour-7-F14-3-ex2_FS-65V.20058.20058.4.0.dta	4	3393.8	7.80051e-05	0.0029444	-0.004994	-1.47151	4.91855e-06	7.24018e-07
	2	mice-tumour-7-F14-2-ex2_FS-65V.20167.20167.4.1.dta	4	3393.79	0.00105224	0.0299508	-0.008284	-2.44092	0.00297999	7.5688e-05
	3	mice-tumour-7-F14-1-ex2_FS-65V.20230.20230.4.0.dta	4	3393.79	1.49826e-05	0.110395	-0.007118	-2.09735	2.50526e-06	1.57966e-06
431	IISKEGIPGLYR(4)-QTLGVTQK(8)	2357.34	null	NP_037518 GeneID:29957 SLC25A24(437)-NP_037518 GeneID:29957 SLC25A24(477)/NP_037518 GeneID:29957 SLC25A24(437)-NP_998816 GeneID:29957 SLC25A24(458)/NP_998816 GeneID:29957 SLC25A24(418)-NP_037518 GeneID:29957 SLC25A24(477)/NP_998816 GeneID:29957 SLC25A24(418)-NP_998816 GeneID:29957 SLC25A24(458)/	Intra-Protein							NP_037518	GeneID:29957	SLC25A24(437)	NP_037518	GeneID:29957	SLC25A24(477)
	1	mice-tumour-7-F12-1-ex2_FS-65v.23899.23899.3.1.dta	3	2357.34	1	0.435824	-0.005269	-2.23514	0.0158848	1
432	IKAALEAVGGTVVLE(2)-ANVAKAEAEK(5)	2637.47	null	NP_002940 GeneID:6182 MRPL12(185)-NP_002940 GeneID:6182 MRPL12(178)/	Intra-Protein							NP_002940	GeneID:6182	MRPL12(185)	NP_002940	GeneID:6182	MRPL12(178)
	1	mice-tumour-7-F19-1-ex2_FS-45v.21350.21350.3.0.dta	3	2637.46	6.53599e-10	0.00168502	-0.006516	-2.47055	1.74007e-05	1
	2	mice-tumour-7-F19-3-ex2_FS-45v.21307.21307.3.0.dta	3	2637.47	3.58355e-09	0.00469248	-0.005678	-2.15282	2.63421e-07	7.6838e-08
	3	mice-tumour-7-F19-3-ex2_FS-45v.21290.21290.3.0.dta	3	2637.47	1.80884e-09	0.00484491	-0.005678	-2.15282	9.38413e-07	1.03312e-08
	4	mice-tumour-7-F19-2-ex2_FS-45v.21321.21321.3.0.dta	3	2637.47	7.20117e-09	0.086598	-0.005622	-2.13159	8.96608e-05	1
433	IKHGLSEK(2)-KWGFQPR(1)	1967.09	null	NP_001014446 GeneID:132299 OCIAD2(140)-NP_065129 GeneID:10017 BCL2L10(120)/NP_001273703 GeneID:132299 OCIAD2(78)-NP_065129 GeneID:10017 BCL2L10(120)/	Inter-Protein							NP_001014446	GeneID:132299	OCIAD2(140)	NP_065129	GeneID:10017	BCL2L10(120)
	1	mice-tumour-7-F14-2-ex2_FS-45V.9039.9039.5.1.dta	5	1967.09	1	0.374039	-0.000511	-0.259775	0.183638	1
434	IKNEVDSTLTFR(2)-KFAIYR(1)	2357.29	null	NP_002991 GeneID:6390 SDHB(80)-NP_002991 GeneID:6390 SDHB(41)/	Intra-Protein							NP_002991	GeneID:6390	SDHB(80)	NP_002991	GeneID:6390	SDHB(41)
	1	mice-tumour-7-F11-3-ex2_FS-65v.20488.20488.4.0.dta	4	2357.28	0.00011559	0.000287144	-0.004928	-2.09054	4.60763e-06	3.09036e-05
	2	mice-tumour-7-F11-1-ex2_FS-65v.20726.20726.4.0.dta	4	2357.28	3.43679e-06	0.00297287	-0.006663	-2.82655	0.000764967	1.44243e-06
	3	mice-tumour-7-F11-2-ex2_FS-65v.20673.20673.4.0.dta	4	2357.28	2.63534e-05	0.00337409	-0.001371	-0.581601	0.00145395	3.23193e-05
	4	mice-tumour-7-F11-3-ex2_FS-65v.20530.20530.4.1.dta	4	2357.28	0.291009	0.135432	-0.004913	-2.08418	1	0.00335861
435	IKSAKENLK(2)-IKEAAR(2)	1855.1	null	NP_001122099 GeneID:56907 SPIRE1(119)-NP_001017989 GeneID:80207 OPA3(28)/NP_001122099 GeneID:56907 SPIRE1(119)-NP_079412 GeneID:80207 OPA3(28)/NP_001122098 GeneID:56907 SPIRE1(239)-NP_001017989 GeneID:80207 OPA3(28)/NP_001122098 GeneID:56907 SPIRE1(239)-NP_079412 GeneID:80207 OPA3(28)/NP_064533 GeneID:56907 SPIRE1(239)-NP_001017989 GeneID:80207 OPA3(28)/NP_064533 GeneID:56907 SPIRE1(239)-NP_07941…	Inter-Protein							NP_001122099	GeneID:56907	SPIRE1(119)	NP_001017989	GeneID:80207	OPA3(28)
	1	mice-tumour-7-F18-3-ex2_FS-45v.6969.6969.4.0.dta	4	1855.1	0.0442924	0.0263447	-0.000178	-0.095952	0.00705354	0.0991428
436	ILDVLEEIPKNAAYR(10)-KYTEQITNEK(1)	3134.66	null	NP_001269350 GeneID:4698 NDUFA5(37)-NP_001269350 GeneID:4698 NDUFA5(43)/NP_001269350 GeneID:4698 NDUFA5(37)-NP_001269349 GeneID:4698 NDUFA5(46)/NP_001269350 GeneID:4698 NDUFA5(37)-NP_001269348 GeneID:4698 NDUFA5(31)/NP_001269350 GeneID:4698 NDUFA5(37)-NP_004991 GeneID:4698 NDUFA5(46)/NP_001269349 GeneID:4698 NDUFA5(40)-NP_001269350 GeneID:4698 NDUFA5(43)/NP_001269349 GeneID:4698 NDUFA5(40)-NP_001…	Intra-Protein							NP_004991	GeneID:4698	NDUFA5(40)	NP_004991	GeneID:4698	NDUFA5(46)
	1	mice-tumour-7-F20-2-ex2_FS-65v.23900.23900.4.0.dta	4	3134.66	7.42351e-08	2.10913e-15	-0.003549	-1.13218	4.02908e-10	3.02659e-07
	2	mice-tumour-7-F20-3-ex2_FS-65v.23955.23955.4.0.dta	4	3134.66	9.01729e-06	5.09217e-05	-0.004101	-1.30828	3.41391e-09	1.38547e-06
	3	mice-tumour-7-F20-1-ex2_FS-65v.24003.24003.4.1.dta	4	3134.66	3.45453e-05	0.0174701	-0.006042	-1.92748	5.69961e-10	4.06007e-07
437	ILKEDILNYLEK(3)-LSEVVGSGKDGR(9)	2831.54	null	NP_001909 GeneID:1629 DBT(202)-NP_001909 GeneID:1629 DBT(196)/	Intra-Protein							NP_001909	GeneID:1629	DBT(202)	NP_001909	GeneID:1629	DBT(196)
	1	mice-tumour-7-F19-2-ex2_FS-45v.26862.26862.4.1.dta	4	2831.54	0.117012	0.0555405	-0.002423	-0.855718	2.77865e-06	0.377318
438	ILQKQGFK(4)-FKLNTK(2)	1849.09	null	NP_000099 GeneID:1738 DLD(267)-NP_000099 GeneID:1738 DLD(273)/NP_000099 GeneID:1738 DLD(267)-NP_001276679 GeneID:1738 DLD(174)/NP_000099 GeneID:1738 DLD(267)-NP_001276680 GeneID:1738 DLD(250)/NP_000099 GeneID:1738 DLD(267)-NP_001276681 GeneID:1738 DLD(225)/NP_001276679 GeneID:1738 DLD(168)-NP_000099 GeneID:1738 DLD(273)/NP_001276679 GeneID:1738 DLD(168)-NP_001276679 GeneID:1738 DLD(174)/NP_001276…	Intra-Protein							NP_001276680	GeneID:1738	DLD(244)	NP_001276680	GeneID:1738	DLD(250)
	1	mice-tumour-7-F11-2-ex2_FS-45v.12049.12049.4.0.dta	4	1849.09	0.000260566	0.000999775	-0.00221	-1.19518	0.000830099	0.000536591
	2	mice-tumour-7-F11-1-ex2_FS-45v.12006.12006.4.0.dta	4	1849.09	6.43927e-05	0.00568456	-0.002305	-1.24656	0.00169177	0.00132434
	3	mice-tumour-7-F11-3-ex2_FS-45v.11971.11971.4.0.dta	4	1849.09	0.000358868	0.0612106	-0.002089	-1.12974	0.00200447	0.00222048
439	IMGLDLPDGGHLTHGYMSDVKR(21)-AVDPKTGR(5)	3392.71	null	NP_005403 GeneID:6472 SHMT2(181)-NP_005403 GeneID:6472 SHMT2(302)/NP_005403 GeneID:6472 SHMT2(181)-NP_001159831 GeneID:6472 SHMT2(281)/NP_005403 GeneID:6472 SHMT2(181)-NP_001159830 GeneID:6472 SHMT2(281)/NP_005403 GeneID:6472 SHMT2(181)-NP_001159828 GeneID:6472 SHMT2(292)/NP_005403 GeneID:6472 SHMT2(181)-NP_001159829 GeneID:6472 SHMT2(281)/NP_001159831 GeneID:6472 SHMT2(160)-NP_005403 GeneID:6472…	Intra-Protein							NP_005403	GeneID:6472	SHMT2(181)	NP_005403	GeneID:6472	SHMT2(302)
	1	mice-tumour-7-F18-3-ex2_FS-45v.18819.18819.5.1.dta	5	3392.72	0.000940464	0.00143842	0.011818	3.48335	0.00267368	0.000487905
	2	mice-tumour-7-F18-3-ex2_FS-45v.18838.18838.5.0.dta	5	3392.72	0.0862124	0.0558994	0.011818	3.48335	0.0873291	0.159246
440	IMGLDLPDGGHLTHGYMSDVKR(21)-YSEGYPGKR(8)	3605.75	null	NP_005403 GeneID:6472 SHMT2(181)-NP_005403 GeneID:6472 SHMT2(103)/NP_005403 GeneID:6472 SHMT2(181)-NP_001159831 GeneID:6472 SHMT2(82)/NP_005403 GeneID:6472 SHMT2(181)-NP_001159830 GeneID:6472 SHMT2(82)/NP_005403 GeneID:6472 SHMT2(181)-NP_001159828 GeneID:6472 SHMT2(103)/NP_005403 GeneID:6472 SHMT2(181)-NP_001159829 GeneID:6472 SHMT2(82)/NP_001159831 GeneID:6472 SHMT2(160)-NP_005403 GeneID:6472 SH…	Intra-Protein							NP_005403	GeneID:6472	SHMT2(181)	NP_005403	GeneID:6472	SHMT2(103)
	1	mice-tumour-7-F19-3-ex2_FS-45v.18752.18752.5.0.dta	5	3605.75	8.25665e-06	0.103602	-0.005376	-1.49095	2.04474e-05	3.4754e-05
	2	mice-tumour-7-F19-3-ex2_FS-45v.18798.18798.5.0.dta	5	3605.75	0.000469203	0.30712	-0.005473	-1.51785	1.52769e-06	5.05657e-05
441	IMMQVHGSKSDK(9)-IISKEGIPGLYR(4)	2843.52	null	NP_037518 GeneID:29957 SLC25A24(228)-NP_037518 GeneID:29957 SLC25A24(437)/NP_037518 GeneID:29957 SLC25A24(228)-NP_998816 GeneID:29957 SLC25A24(418)/NP_998816 GeneID:29957 SLC25A24(209)-NP_037518 GeneID:29957 SLC25A24(437)/NP_998816 GeneID:29957 SLC25A24(209)-NP_998816 GeneID:29957 SLC25A24(418)/	Intra-Protein							NP_037518	GeneID:29957	SLC25A24(228)	NP_037518	GeneID:29957	SLC25A24(437)
	1	mice-tumour-7-F16-1-ex2_FS-65v.17758.17758.5.0.dta	5	2843.51	0.0011898	0.0550146	-0.003035	-1.06734	0.00161328	2.82575e-07
	2	mice-tumour-7-F16-3-ex2_FS-65v.17655.17655.5.0.dta	5	2843.51	0.226105	0.0776459	-0.001952	-0.686474	0.854607	1.65479e-08
	3	mice-tumour-7-F16-2-ex2_FS-65v.17738.17738.5.0.dta	5	2843.52	0.379995	0.128315	-0.00041	-0.144188	1	6.00745e-07
442	IPAMTIAKNAGVEGSLIVEK(8)-SIAKEGFEK(4)	3186.73	null	NP_002147 GeneID:3329 HSPD1(481)-NP_002147 GeneID:3329 HSPD1(125)/NP_002147 GeneID:3329 HSPD1(481)-NP_955472 GeneID:3329 HSPD1(125)/NP_955472 GeneID:3329 HSPD1(481)-NP_002147 GeneID:3329 HSPD1(125)/NP_955472 GeneID:3329 HSPD1(481)-NP_955472 GeneID:3329 HSPD1(125)/	Intra-Protein							NP_002147	GeneID:3329	HSPD1(481)	NP_002147	GeneID:3329	HSPD1(125)
	1	mice-tumour-7-F18-3-ex2_FS-45v.23201.23201.4.0.dta	4	3186.74	0.000688337	2.21413e-16	0.005087	1.59631	1.52797e-07	0.000360947
	2	mice-tumour-7-F18-2-ex2_FS-45v.23160.23160.4.0.dta	4	3186.73	9.16308e-05	2.00513e-06	-0.001613	-0.506161	9.34185e-12	8.89132e-05
	3	mice-tumour-7-F18-1-ex2_FS-45v.23215.23215.4.0.dta	4	3186.73	0.000865417	0.0096436	-0.003586	-1.12529	2.23139e-10	0.000107788
	4	mice-tumour-7-F18-1-ex2_FS-45v.23177.23177.4.1.dta	4	3186.73	0.316564	0.283055	-0.003586	-1.12529	1	0.21969
443	IPAPVEKSVRR(7)-FPKILENLR(3)	2518.49	null	NP_001084 GeneID:32 ACACB(1059)-NP_066270 GeneID:1159 CKMT1B(343)/NP_001084 GeneID:32 ACACB(1059)-NP_001015001 GeneID:548596 CKMT1A(343)/	Inter-Protein							NP_001084	GeneID:32	ACACB(1059)	NP_066270	GeneID:1159	CKMT1B(343)
												NP_001084	GeneID:32	ACACB(1059)	NP_001015001	GeneID:548596	CKMT1A(343)
	1	mice-tumour-7-F3-1-ex2_FS-65v.26533.26533.6.2.dta	6	2518.47	1	0.501359	-0.020148	-8.00004	0.0917403	1
444	IPDETLEKLK(8)-KIDQEGK(1)	2140.17	null	NP_054768 GeneID:28976 ACAD9(100)-NP_054768 GeneID:28976 ACAD9(86)/	Intra-Protein							NP_054768	GeneID:28976	ACAD9(100)	NP_054768	GeneID:28976	ACAD9(86)
	1	mice-tumour-7-F18-1-ex2_FS-65v.12693.12693.4.0.dta	4	2140.17	9.43028e-09	1.68579e-11	-0.002851	-1.33213	3.03202e-09	3.75697e-16
	2	mice-tumour-7-F18-2-ex2_FS-65v.12560.12560.4.0.dta	4	2140.17	1.45701e-06	2.2619e-05	-0.004353	-2.03395	4.1095e-06	2.18992e-10
	3	mice-tumour-7-F18-3-ex2_FS-65v.12622.12622.4.0.dta	4	2140.17	6.62741e-12	0.000191581	-0.005422	-2.53344	4.41118e-11	8.78288e-14
	4	mice-tumour-7-F19-2-ex2_FS-65v.12255.12255.4.2.dta	4	2140.17	0.00508908	0.00216456	-0.002555	-1.19383	0.0071058	2.36636e-07
	5	mice-tumour-7-F18-1-ex2_FS-65v.12810.12810.4.0.dta	4	2140.17	1	0.0278995	-0.003253	-1.51997	1	0.439146
	6	mice-tumour-7-F19-3-ex2_FS-65v.12283.12283.4.2.dta	4	2140.17	0.47572	0.180172	-0.003528	-1.64846	1	0.00050486
445	IPKEQGFLSFWR(3)-LAADVGKGAAQR(7)	2801.51	null	NP_001142 GeneID:291 SLC25A4(63)-NP_001142 GeneID:291 SLC25A4(147)/	Intra-Protein							NP_001142	GeneID:291	SLC25A4(63)	NP_001142	GeneID:291	SLC25A4(147)
	1	mice-tumour-7-F14-3-ex2_FS-65V.26320.26320.4.1.dta	4	2801.51	0.612285	0.020459	-0.000612	-0.218454	0.0139527	0.506753
	2	mice-tumour-7-F14-1-ex2_FS-65V.26427.26427.4.2.dta	4	2801.5	0.0705185	0.537198	-0.008382	-2.99196	0.0207974	0.464996
446	IPKEQGVLSFWR(3)-GLGDCLVKITK(8)	2800.54	Carbamidomethyl[C](20)	NP_001627 GeneID:293 SLC25A6(63)-NP_001627 GeneID:293 SLC25A6(163)/NP_001143 GeneID:292 SLC25A5(63)-NP_001627 GeneID:293 SLC25A6(163)/	Intra-Protein							NP_001627	GeneID:293	SLC25A6(63)	NP_001627	GeneID:293	SLC25A6(163)
												NP_001143	GeneID:292	SLC25A5(63)	NP_001627	GeneID:293	SLC25A6(163)
	1	mice-tumour-7-F16-3-ex2_FS-65v.30132.30132.4.0.dta	4	2800.54	0.00404478	0.0040905	-0.002292	-0.818413	2.0879e-06	0.000771957
447	IPKEQGVLSFWR(3)-IYKSDGIK(3)	2520.39	null	NP_001627 GeneID:293 SLC25A6(63)-NP_001143 GeneID:292 SLC25A5(166)/NP_001143 GeneID:292 SLC25A5(63)-NP_001143 GeneID:292 SLC25A5(166)/	Intra-Protein							NP_001627	GeneID:293	SLC25A6(63)	NP_001143	GeneID:292	SLC25A5(166)
												NP_001143	GeneID:292	SLC25A5(63)	NP_001143	GeneID:292	SLC25A5(166)
	1	mice-tumour-7-F16-2-ex2_FS-65v.24076.24076.4.0.dta	4	2520.38	0.000999157	4.83165e-05	-0.002142	-0.84987	0.0154366	7.0902e-06
	2	mice-tumour-7-F16-3-ex2_FS-65v.24015.24015.4.1.dta	4	2520.38	0.00070674	0.000797453	-0.005433	-2.15562	0.00147494	0.000181429
	3	mice-tumour-7-F16-1-ex2_FS-65v.24183.24183.4.0.dta	4	2520.38	0.000482287	0.00887766	-0.00497	-1.97192	7.72429e-05	0.000361409
	4	mice-tumour-7-F16-2-ex2_FS-65v.24135.24135.4.0.dta	4	2520.38	0.0495181	0.0627201	-0.00217	-0.860979	0.0334516	0.0534689
	5	mice-tumour-7-F16-2-ex2_FS-65v.24090.24090.3.1.dta	3	2520.38	0.00122085	0.0882445	-0.007146	-2.83528	0.000619198	0.000773343
	6	mice-tumour-7-F16-3-ex2_FS-65v.24057.24057.3.1.dta	3	2520.37	0.0145156	0.271195	-0.01399	-5.55074	3.54437e-05	0.0021002
	7	mice-tumour-7-F16-1-ex2_FS-65v.24212.24212.3.1.dta	3	2520.38	0.00561792	0.273345	-0.008886	-3.52565	0.000438607	0.00327078
448	IPKEQGVLSFWR(3)-LAADVGKAGAER(7)	2754.49	null	NP_001627 GeneID:293 SLC25A6(63)-NP_001143 GeneID:292 SLC25A5(147)/NP_001143 GeneID:292 SLC25A5(63)-NP_001143 GeneID:292 SLC25A5(147)/	Intra-Protein							NP_001627	GeneID:293	SLC25A6(63)	NP_001143	GeneID:292	SLC25A5(147)
												NP_001143	GeneID:292	SLC25A5(63)	NP_001143	GeneID:292	SLC25A5(147)
	1	mice-tumour-7-F17-2-ex2_FS-65v.22897.22897.4.0.dta	4	2754.49	4.07756e-05	2.57174e-08	-0.005372	-1.95027	4.35282e-08	4.41362e-05
	2	mice-tumour-7-F16-2-ex2_FS-65v.23757.23757.4.0.dta	4	2754.49	9.10591e-05	1.05044e-06	-0.004286	-1.556	5.88108e-07	1.74096e-05
	3	mice-tumour-7-F17-2-ex2_FS-65v.22917.22917.4.0.dta	4	2754.49	1.51324e-07	1.42848e-06	-0.005372	-1.95027	2.93494e-09	1.57443e-06
	4	mice-tumour-7-F16-3-ex2_FS-65v.23717.23717.4.0.dta	4	2754.49	1.84025e-07	4.73938e-06	-0.005843	-2.12126	1.26709e-08	1.10946e-07
	5	mice-tumour-7-F16-1-ex2_FS-65v.23871.23871.4.0.dta	4	2754.49	3.17792e-07	0.000238699	-0.004919	-1.78581	8.40223e-08	6.78628e-08
	6	mice-tumour-7-F16-1-ex2_FS-65v.23967.23967.4.0.dta	4	2754.49	8.01051e-05	0.00122259	-0.005114	-1.8566	7.65461e-07	1.96038e-06
	7	mice-tumour-7-F17-1-ex2_FS-65v.22825.22825.4.0.dta	4	2754.49	5.52619e-09	0.0075716	-0.003977	-1.44382	2.57683e-09	1.68711e-07
	8	mice-tumour-7-F17-3-ex2_FS-65v.22936.22936.4.0.dta	4	2754.49	1.20167e-07	0.00960728	-0.005164	-1.87475	8.10019e-10	3.46562e-07
	9	mice-tumour-7-F16-1-ex2_FS-45v.21415.21415.3.0.dta	3	2754.48	0.00367008	0.132039	-0.012539	-4.5522	8.35637e-11	0.00134121
449	IPKEQGVLSFWR(3)-LAADVGKSGTER(7)	2800.5	null	NP_001627 GeneID:293 SLC25A6(63)-NP_001627 GeneID:293 SLC25A6(147)/NP_001143 GeneID:292 SLC25A5(63)-NP_001627 GeneID:293 SLC25A6(147)/	Intra-Protein							NP_001627	GeneID:293	SLC25A6(63)	NP_001627	GeneID:293	SLC25A6(147)
												NP_001143	GeneID:292	SLC25A5(63)	NP_001627	GeneID:293	SLC25A6(147)
	1	mice-tumour-7-F16-2-ex2_FS-65v.23395.23395.4.0.dta	4	2800.49	3.34125e-06	5.47228e-07	-0.007964	-2.84378	2.43332e-08	7.36439e-06
	2	mice-tumour-7-F16-3-ex2_FS-65v.23296.23296.4.0.dta	4	2800.49	0.00193751	0.00458778	-0.009577	-3.41975	3.60112e-10	0.00773485
	3	mice-tumour-7-F16-1-ex2_FS-65v.23467.23467.4.2.dta	4	2800.49	0.000141578	0.0125188	-0.007311	-2.61061	5.47061e-08	0.00198993
450	IPKEQGVLSFWR(3)-QIFLGGVDKR(9)	2729.51	null	NP_001627 GeneID:293 SLC25A6(63)-NP_001143 GeneID:292 SLC25A5(105)/NP_001143 GeneID:292 SLC25A5(63)-NP_001143 GeneID:292 SLC25A5(105)/	Intra-Protein							NP_001627	GeneID:293	SLC25A6(63)	NP_001143	GeneID:292	SLC25A5(105)
												NP_001143	GeneID:292	SLC25A5(63)	NP_001143	GeneID:292	SLC25A5(105)
	1	mice-tumour-7-F16-2-ex2_FS-65v.29165.29165.4.0.dta	4	2729.51	0.225945	0.00338089	-0.007779	-2.84996	3.38992e-08	0.128217
	2	mice-tumour-7-F16-3-ex2_FS-65v.29054.29054.4.0.dta	4	2729.51	0.234298	0.0503163	-0.008529	-3.12473	6.94173e-05	0.0972213
	3	mice-tumour-7-F17-3-ex2_FS-65v.28582.28582.4.1.dta	4	2729.51	0.0539956	0.0909335	-0.003692	-1.35262	5.35395e-07	0.107475
	4	mice-tumour-7-F16-1-ex2_FS-65v.29287.29287.4.0.dta	4	2729.5	1	0.535092	-0.010135	-3.71312	0.000489189	1
451	IPKEQGVLSFWR(3)-VKLLLQVQHASK(2)	2960.71	null	NP_001627 GeneID:293 SLC25A6(63)-NP_001142 GeneID:291 SLC25A4(33)/NP_001627 GeneID:293 SLC25A6(63)-NP_001627 GeneID:293 SLC25A6(33)/NP_001627 GeneID:293 SLC25A6(63)-NP_001143 GeneID:292 SLC25A5(33)/NP_001143 GeneID:292 SLC25A5(63)-NP_001142 GeneID:291 SLC25A4(33)/NP_001143 GeneID:292 SLC25A5(63)-NP_001627 GeneID:293 SLC25A6(33)/NP_001143 GeneID:292 SLC25A5(63)-NP_001143 GeneID:292 SLC25A5(33)/	Intra-Protein							NP_001627	GeneID:293	SLC25A6(63)	NP_001142	GeneID:291	SLC25A4(33)
												NP_001627	GeneID:293	SLC25A6(63)	NP_001627	GeneID:293	SLC25A6(33)
												NP_001627	GeneID:293	SLC25A6(63)	NP_001143	GeneID:292	SLC25A5(33)
												NP_001143	GeneID:292	SLC25A5(63)	NP_001142	GeneID:291	SLC25A4(33)
												NP_001143	GeneID:292	SLC25A5(63)	NP_001627	GeneID:293	SLC25A6(33)
												NP_001143	GeneID:292	SLC25A5(63)	NP_001143	GeneID:292	SLC25A5(33)
	1	mice-tumour-7-F17-2-ex2_FS-65v.25715.25715.5.0.dta	5	2960.71	3.17894e-05	0.000502145	-0.002193	-0.740701	2.44559e-05	4.24203e-08
452	IQEAGTEVVKAK(10)-KGEDFVK(1)	2232.21	null	NP_005909 GeneID:4191 MDH2(239)-NP_005909 GeneID:4191 MDH2(329)/NP_005909 GeneID:4191 MDH2(239)-NP_001269332 GeneID:4191 MDH2(287)/NP_005909 GeneID:4191 MDH2(239)-NP_001269333 GeneID:4191 MDH2(222)/NP_001269332 GeneID:4191 MDH2(197)-NP_005909 GeneID:4191 MDH2(329)/NP_001269332 GeneID:4191 MDH2(197)-NP_001269332 GeneID:4191 MDH2(287)/NP_001269332 GeneID:4191 MDH2(197)-NP_001269333 GeneID:4191 MDH2…	Intra-Protein							NP_005909	GeneID:4191	MDH2(239)	NP_005909	GeneID:4191	MDH2(329)
	1	mice-tumour-7-F16-2-ex2_FS-65v.10155.10155.4.2.dta	4	2232.23	5.39696e-05	0.00157084	0.015596	6.98679	8.8523e-05	6.5196e-10
	2	mice-tumour-7-F16-3-ex2_FS-65v.10073.10073.4.1.dta	4	2232.23	0.00102241	0.0374067	0.015974	7.15613	0.00272876	2.80741e-07
	3	mice-tumour-7-F16-3-ex2_FS-65v.10126.10126.3.1.dta	3	2232.22	0.00117408	0.286259	0.004548	2.03744	0.00863735	1.58201e-06
	4	mice-tumour-7-F16-1-ex2_FS-65v.10226.10226.3.1.dta	3	2232.21	4.61324e-05	0.328165	-0.000994	-0.445298	0.000146903	1.05616e-05
453	IQEAGTEVVKAK(10)-KPGMTR(1)	2099.15	null	NP_005909 GeneID:4191 MDH2(239)-NP_005909 GeneID:4191 MDH2(105)/NP_005909 GeneID:4191 MDH2(239)-NP_001269332 GeneID:4191 MDH2(105)/NP_001269332 GeneID:4191 MDH2(197)-NP_005909 GeneID:4191 MDH2(105)/NP_001269332 GeneID:4191 MDH2(197)-NP_001269332 GeneID:4191 MDH2(105)/NP_001269333 GeneID:4191 MDH2(132)-NP_005909 GeneID:4191 MDH2(105)/NP_001269333 GeneID:4191 MDH2(132)-NP_001269332 GeneID:4191 MDH2…	Intra-Protein							NP_005909	GeneID:4191	MDH2(239)	NP_005909	GeneID:4191	MDH2(105)
	1	mice-tumour-7-F1-3-ex2_FS-65V.8397.8397.4.0.dta	4	2099.15	7.3728e-14	7.68756e-06	-0.003964	-1.88838	7.82522e-12	7.01954e-22
	2	mice-tumour-7-F1-3-ex2_FS-65V.8388.8388.4.1.dta	4	2099.15	1.3839e-10	0.000103059	-0.004893	-2.33094	6.12349e-10	3.11257e-15
	3	mice-tumour-7-F1-1-ex2_FS-65v.8446.8446.4.0.dta	4	2099.15	1.25708e-15	0.000214193	-0.004063	-1.93554	1.20547e-12	4.97648e-20
	4	mice-tumour-7-F1-2-ex2_FS-65V.8241.8241.4.0.dta	4	2099.15	1.89949e-10	0.000710302	-0.005432	-2.58771	3.66367e-08	2.98869e-14
	5	mice-tumour-7-F2-1-ex2_FS-65v.7745.7745.4.3.dta	4	2099.15	0.00657559	0.0166907	-0.006398	-3.0479	0.00823582	2.54491e-07
454	IQEIIEQLDVTTSEYEKEK(17)-GDKAQIEK(3)	3320.7	null	NP_002147 GeneID:3329 HSPD1(387)-NP_002147 GeneID:3329 HSPD1(364)/NP_002147 GeneID:3329 HSPD1(387)-NP_955472 GeneID:3329 HSPD1(364)/NP_955472 GeneID:3329 HSPD1(387)-NP_002147 GeneID:3329 HSPD1(364)/NP_955472 GeneID:3329 HSPD1(387)-NP_955472 GeneID:3329 HSPD1(364)/	Intra-Protein							NP_002147	GeneID:3329	HSPD1(387)	NP_002147	GeneID:3329	HSPD1(364)
	1	mice-tumour-7-F1-3-ex2_FS-65V.23434.23434.4.0.dta	4	3320.7	5.03122e-14	0.000178581	0.001875	0.56464	2.32225e-16	3.34433e-09
	2	mice-tumour-7-F1-2-ex2_FS-65V.23403.23403.4.0.dta	4	3320.69	6.04122e-10	0.0020703	-0.005496	-1.65507	1.65274e-19	4.93728e-07
	3	mice-tumour-7-F1-1-ex2_FS-65v.23604.23604.4.0.dta	4	3320.7	4.86549e-09	0.00534688	0.000142	0.042762	2.58e-07	7.54296e-09
455	IQEIIEQLDVTTSEYEKEK(17)-KGVITVK(1)	3176.72	null	NP_002147 GeneID:3329 HSPD1(387)-NP_002147 GeneID:3329 HSPD1(196)/NP_002147 GeneID:3329 HSPD1(387)-NP_955472 GeneID:3329 HSPD1(196)/NP_955472 GeneID:3329 HSPD1(387)-NP_002147 GeneID:3329 HSPD1(196)/NP_955472 GeneID:3329 HSPD1(387)-NP_955472 GeneID:3329 HSPD1(196)/	Intra-Protein							NP_002147	GeneID:3329	HSPD1(387)	NP_002147	GeneID:3329	HSPD1(196)
	1	mice-tumour-7-F20-2-ex2_FS-65v.23940.23940.4.0.dta	4	3176.71	0.000844145	1.92461e-12	-0.00782	-2.46166	9.35523e-12	8.32362e-05
	2	mice-tumour-7-F20-3-ex2_FS-65v.23992.23992.4.0.dta	4	3176.71	5.88522e-10	6.86432e-05	-0.008795	-2.76858	1.14512e-12	4.17197e-09
	3	mice-tumour-7-F1-3-ex2_FS-65V.25772.25772.4.0.dta	4	3176.71	7.69006e-08	0.00212643	-0.003976	-1.25161	0.000304563	1.83019e-06
	4	mice-tumour-7-F20-1-ex2_FS-65v.24042.24042.4.0.dta	4	3176.71	8.43713e-11	0.00848983	-0.007475	-2.35306	3.74927e-11	2.87442e-08
	5	mice-tumour-7-F1-2-ex2_FS-65V.25740.25740.4.0.dta	4	3176.72	3.38068e-12	0.0261974	-0.003263	-1.02716	0.000132385	2.95886e-11
	6	mice-tumour-7-F1-1-ex2_FS-65v.25975.25975.4.0.dta	4	3176.72	3.05315e-11	0.0655031	-0.001328	-0.418041	1	4.19473e-08
456	IQEIIEQLDVTTSEYEKEK(17)-LAKLSDGVAVLK(3)	3645.97	null	NP_002147 GeneID:3329 HSPD1(387)-NP_002147 GeneID:3329 HSPD1(396)/NP_002147 GeneID:3329 HSPD1(387)-NP_955472 GeneID:3329 HSPD1(396)/NP_955472 GeneID:3329 HSPD1(387)-NP_002147 GeneID:3329 HSPD1(396)/NP_955472 GeneID:3329 HSPD1(387)-NP_955472 GeneID:3329 HSPD1(396)/	Intra-Protein							NP_002147	GeneID:3329	HSPD1(387)	NP_002147	GeneID:3329	HSPD1(396)
	1	mice-tumour-7-F1-3-ex2_FS-65V.29693.29693.4.0.dta	4	3645.97	1.61773e-07	2.09551e-07	-0.003556	-0.975323	2.14325e-13	2.30429e-11
	2	mice-tumour-7-F1-2-ex2_FS-45V.27197.27197.4.0.dta	4	3645.97	1.82889e-11	8.10436e-06	-0.005823	-1.5971	2.75545e-12	5.29829e-11
	3	mice-tumour-7-F1-2-ex2_FS-65V.29628.29628.4.0.dta	4	3645.97	0.00262969	3.38174e-05	-0.001518	-0.41635	0.000182993	0.000108728
	4	mice-tumour-7-F1-2-ex2_FS-45V.27133.27133.4.0.dta	4	3645.98	3.06271e-07	0.000114686	0.006913	1.89606	2.03346e-07	3.79471e-06
	5	mice-tumour-7-F1-3-ex2_FS-45V.27089.27089.4.0.dta	4	3645.98	1.23767e-10	0.000226459	0.005797	1.58997	2.19291e-08	1.03439e-10
	6	mice-tumour-7-F1-1-ex2_FS-65v.29869.29869.4.0.dta	4	3645.97	0.000229589	0.00273297	0.000264	0.072409	1	2.1571e-05
	7	mice-tumour-7-F1-1-ex2_FS-45.27158.27158.4.0.dta	4	3645.98	0.00952125	0.0291137	0.005932	1.627	0.00532152	0.00419759
	8	mice-tumour-7-F2-1-ex2_FS-45V.26481.26481.4.2.dta	4	3645.97	1	0.287521	-0.004135	-1.13413	1	1
457	IQEIIEQLDVTTSEYEKEK(17)-VGGTSDVEVNEKK(12)	3793.91	null	NP_002147 GeneID:3329 HSPD1(387)-NP_002147 GeneID:3329 HSPD1(417)/NP_002147 GeneID:3329 HSPD1(387)-NP_955472 GeneID:3329 HSPD1(417)/NP_955472 GeneID:3329 HSPD1(387)-NP_002147 GeneID:3329 HSPD1(417)/NP_955472 GeneID:3329 HSPD1(387)-NP_955472 GeneID:3329 HSPD1(417)/	Intra-Protein							NP_002147	GeneID:3329	HSPD1(387)	NP_002147	GeneID:3329	HSPD1(417)
	1	mice-tumour-7-F1-3-ex2_FS-45V.20946.20946.4.2.dta	4	3793.91	0.0251547	0.0330221	-0.003859	-1.01716	0.00873041	0.0312688
	2	mice-tumour-7-F1-2-ex2_FS-45V.20946.20946.4.2.dta	4	3793.92	0.0184392	0.116359	0.005381	1.41833	0.00211524	0.00854433
458	IQEIIEQLDVTTSEYEKEKLNER(17)-LAKLSDGVAVLK(3)	4158.24	null	NP_002147 GeneID:3329 HSPD1(387)-NP_002147 GeneID:3329 HSPD1(396)/NP_002147 GeneID:3329 HSPD1(387)-NP_955472 GeneID:3329 HSPD1(396)/NP_955472 GeneID:3329 HSPD1(387)-NP_002147 GeneID:3329 HSPD1(396)/NP_955472 GeneID:3329 HSPD1(387)-NP_955472 GeneID:3329 HSPD1(396)/	Intra-Protein							NP_002147	GeneID:3329	HSPD1(387)	NP_002147	GeneID:3329	HSPD1(396)
	1	mice-tumour-7-F1-2-ex2_FS-45V.28908.28908.4.0.dta	4	4158.26	0.000156852	0.0411102	0.019248	4.62888	5.41579e-08	1.49338e-05
	2	mice-tumour-7-F1-3-ex2_FS-45V.28923.28923.4.0.dta	4	4158.26	0.00425766	0.276632	0.018999	4.569	4.9192e-05	0.00615328
459	ISGASEKDIVHSGLAYTMER(7)-TAMKYNLGLDLR(4)	3695.88	null	NP_005262 GeneID:2746 GLUD1(503)-NP_005262 GeneID:2746 GLUD1(527)/	Intra-Protein							NP_005262	GeneID:2746	GLUD1(503)	NP_005262	GeneID:2746	GLUD1(527)
	1	mice-tumour-7-F18-1-ex2_FS-65v.26157.26157.5.2.dta	5	3695.88	0.0983653	1.16744e-05	0.002418	0.654243	0.00153016	0.0541752
	2	mice-tumour-7-F18-1-ex2_FS-65v.26196.26196.5.0.dta	5	3695.88	0.199685	3.37364e-05	0.002418	0.654243	1	1
	3	mice-tumour-7-F18-3-ex2_FS-65v.26072.26072.5.1.dta	5	3695.87	0.00318277	0.00375442	-0.002173	-0.587952	0.128144	0.0245938
460	ISKGANPVEIR(3)-DVKFGADAR(3)	2299.24	null	NP_002147 GeneID:3329 HSPD1(133)-NP_002147 GeneID:3329 HSPD1(31)/NP_002147 GeneID:3329 HSPD1(133)-NP_955472 GeneID:3329 HSPD1(31)/NP_955472 GeneID:3329 HSPD1(133)-NP_002147 GeneID:3329 HSPD1(31)/NP_955472 GeneID:3329 HSPD1(133)-NP_955472 GeneID:3329 HSPD1(31)/	Intra-Protein							NP_002147	GeneID:3329	HSPD1(133)	NP_002147	GeneID:3329	HSPD1(31)
	1	mice-tumour-7-F8-3-ex2_FS65v.16729.16729.3.0.dta	3	2299.24	0.000124462	0.00172382	-0.003169	-1.37828	0.0128473	1.67765e-05
461	ISKGANPVEIR(3)-EGFEKISK(5)	2258.24	null	NP_002147 GeneID:3329 HSPD1(133)-NP_002147 GeneID:3329 HSPD1(130)/NP_002147 GeneID:3329 HSPD1(133)-NP_955472 GeneID:3329 HSPD1(130)/NP_955472 GeneID:3329 HSPD1(133)-NP_002147 GeneID:3329 HSPD1(130)/NP_955472 GeneID:3329 HSPD1(133)-NP_955472 GeneID:3329 HSPD1(130)/	Intra-Protein							NP_002147	GeneID:3329	HSPD1(133)	NP_002147	GeneID:3329	HSPD1(130)
	1	mice-tumour-7-F12-3-ex2_FS-65V.15174.15174.3.0.dta	3	2258.24	1	0.124203	-0.000527	-0.233368	0.00624803	1
	2	mice-tumour-7-F12-2-ex2_FS-45v.14216.14216.4.1.dta	4	2258.23	0.0949331	0.127381	-0.004634	-2.05204	0.000668654	0.198382
	3	mice-tumour-7-F12-3-ex2_FS-45V.13884.13884.4.1.dta	4	2258.23	0.14179	0.313554	-0.00492	-2.17869	0.00916695	0.382746
	4	mice-tumour-7-F12-1-ex2_FS-45v.14170.14170.4.1.dta	4	2258.23	1	0.37707	-0.004758	-2.10695	0.901014	1
462	ISKGANPVEIR(3)-SIAKEGFEK(4)	2329.28	null	NP_002147 GeneID:3329 HSPD1(133)-NP_002147 GeneID:3329 HSPD1(125)/NP_002147 GeneID:3329 HSPD1(133)-NP_955472 GeneID:3329 HSPD1(125)/NP_955472 GeneID:3329 HSPD1(133)-NP_002147 GeneID:3329 HSPD1(125)/NP_955472 GeneID:3329 HSPD1(133)-NP_955472 GeneID:3329 HSPD1(125)/	Intra-Protein							NP_002147	GeneID:3329	HSPD1(133)	NP_002147	GeneID:3329	HSPD1(125)
	1	mice-tumour-7-F11-2-ex2_FS-65v.14947.14947.3.0.dta	3	2329.27	2.36693e-06	4.0176e-05	-0.005752	-2.46944	1.30345e-07	2.55976e-06
	2	mice-tumour-7-F11-1-ex2_FS-65v.15004.15004.3.0.dta	3	2329.27	3.18736e-05	5.16742e-05	-0.007029	-3.01768	1.09665e-06	3.33791e-07
	3	mice-tumour-7-F10-3-ex2_FS-65v.14940.14940.3.0.dta	3	2329.27	0.0431058	0.000175557	-0.005806	-2.49262	0.0650755	0.00113215
	4	mice-tumour-7-F11-3-ex2_FS-65v.14723.14723.3.0.dta	3	2329.27	0.000438622	0.000288073	-0.005235	-2.24748	9.2065e-05	4.57707e-06
	5	mice-tumour-7-F12-2-ex2_FS-65v.14688.14688.3.0.dta	3	2329.27	0.0388868	0.000387999	-0.006041	-2.59351	1.44794e-05	0.0125609
	6	mice-tumour-7-F11-2-ex2_FS-45v.13452.13452.4.0.dta	4	2329.27	0.000552264	0.000684826	-0.002731	-1.17247	0.000707211	0.00135468
	7	mice-tumour-7-F10-2-ex2_FS-65v.15064.15064.3.0.dta	3	2329.27	1	0.00110381	-0.005968	-2.56217	0.990318	1
	8	mice-tumour-7-F11-3-ex2_FS-45v.13390.13390.4.0.dta	4	2329.27	5.73074e-05	0.00444253	-0.00491	-2.10795	7.15193e-05	1.70919e-05
	9	mice-tumour-7-F12-2-ex2_FS-65v.14765.14765.3.0.dta	3	2329.27	0.0398357	0.00590496	-0.006204	-2.66349	0.000703799	0.0249414
	10	mice-tumour-7-F11-1-ex2_FS-45v.13372.13372.4.0.dta	4	2329.27	0.000849573	0.0104776	-0.006422	-2.75708	1.83652e-05	0.000311913
	11	mice-tumour-7-F11-3-ex2_FS-45v.13325.13325.4.0.dta	4	2329.27	0.00257739	0.0146211	-0.004879	-2.09464	4.72057e-05	0.00648756
	12	mice-tumour-7-F12-3-ex2_FS-65V.14434.14434.3.0.dta	3	2329.27	0.000131934	0.0197454	-0.007365	-3.16193	1.41231e-06	7.55353e-05
	13	mice-tumour-7-F17-3-ex2_FS-65v.13730.13730.3.0.dta	3	2329.28	0.264122	0.0291677	0.00058	0.249004	0.00036959	0.0869021
	14	mice-tumour-7-F12-1-ex2_FS-65v.14818.14818.3.1.dta	3	2329.27	0.014626	0.0426019	-0.007027	-3.01682	0.00200506	0.00708595
	15	mice-tumour-7-F17-3-ex2_FS-65v.13764.13764.3.1.dta	3	2329.28	1	0.0806447	0.000545	0.233978	0.00781676	1
	16	mice-tumour-7-F11-2-ex2_FS-65v.15119.15119.3.0.dta	3	2329.27	1	0.192677	-0.003135	-1.34591	0.377732	1
	17	mice-tumour-7-F12-1-ex2_FS-45v.13402.13402.4.1.dta	4	2329.27	0.292969	0.265125	-0.005643	-2.42264	0.00834892	0.332387
	18	mice-tumour-7-F12-3-ex2_FS-45V.13147.13147.4.1.dta	4	2329.27	1	0.338962	-0.003619	-1.5537	0.93658	1
463	ISKGANPVEIR(3)-SIDLKDK(5)	2139.2	null	NP_002147 GeneID:3329 HSPD1(133)-NP_002147 GeneID:3329 HSPD1(87)/NP_002147 GeneID:3329 HSPD1(133)-NP_955472 GeneID:3329 HSPD1(87)/NP_955472 GeneID:3329 HSPD1(133)-NP_002147 GeneID:3329 HSPD1(87)/NP_955472 GeneID:3329 HSPD1(133)-NP_955472 GeneID:3329 HSPD1(87)/	Intra-Protein							NP_002147	GeneID:3329	HSPD1(133)	NP_002147	GeneID:3329	HSPD1(87)
	1	mice-tumour-7-F11-2-ex2_FS-45v.14040.14040.4.1.dta	4	2139.2	0.58304	0.00014374	-0.001376	-0.643231	1.09488e-06	1
	2	mice-tumour-7-F11-1-ex2_FS-45v.13999.13999.4.0.dta	4	2139.2	1	0.0116516	-0.001594	-0.745138	0.00029939	1
	3	mice-tumour-7-F11-1-ex2_FS-45v.14031.14031.4.0.dta	4	2139.2	1	0.0156895	-0.001594	-0.745138	0.00146974	1
	4	mice-tumour-7-F11-3-ex2_FS-45v.13992.13992.4.0.dta	4	2139.2	1	0.101638	-0.00215	-1.00505	1.52892e-05	1
464	ISKGANPVEIR(3)-VTKDGVTVAK(3)	2338.33	null	NP_002147 GeneID:3329 HSPD1(133)-NP_002147 GeneID:3329 HSPD1(75)/NP_002147 GeneID:3329 HSPD1(133)-NP_955472 GeneID:3329 HSPD1(75)/NP_955472 GeneID:3329 HSPD1(133)-NP_002147 GeneID:3329 HSPD1(75)/NP_955472 GeneID:3329 HSPD1(133)-NP_955472 GeneID:3329 HSPD1(75)/	Intra-Protein							NP_002147	GeneID:3329	HSPD1(133)	NP_002147	GeneID:3329	HSPD1(75)
	1	mice-tumour-7-F6-1-ex2_FS-45v.11610.11610.4.1.dta	4	2338.33	1	0.00632318	-0.006288	-2.68909	0.155497	1
	2	mice-tumour-7-F6-3-ex2_FS-45v.11617.11617.4.2.dta	4	2338.33	1	0.257371	-0.003653	-1.56222	0.44656	1
465	ISKGANPVEIR(3)-YKNIGAK(2)	2114.2	null	NP_002147 GeneID:3329 HSPD1(133)-NP_002147 GeneID:3329 HSPD1(91)/NP_002147 GeneID:3329 HSPD1(133)-NP_955472 GeneID:3329 HSPD1(91)/NP_955472 GeneID:3329 HSPD1(133)-NP_002147 GeneID:3329 HSPD1(91)/NP_955472 GeneID:3329 HSPD1(133)-NP_955472 GeneID:3329 HSPD1(91)/	Intra-Protein							NP_002147	GeneID:3329	HSPD1(133)	NP_002147	GeneID:3329	HSPD1(91)
	1	mice-tumour-7-F3-2-ex2_FS-45V.10478.10478.4.0.dta	4	2114.2	2.06031e-06	0.000187289	-0.001436	-0.679218	1.42619e-11	4.74306e-06
	2	mice-tumour-7-F3-1-ex2_FS-45v.10439.10439.4.0.dta	4	2114.19	1.59775e-06	0.0159575	-0.002822	-1.33479	4.82587e-12	3.44432e-06
	3	mice-tumour-7-F3-2-ex2_20230117033445_FS-45v.10485.10485.4.0.dta	4	2114.19	1.37232e-08	0.016089	-0.001717	-0.812129	6.67301e-13	1.0038e-05
466	ISKLYGDLK(3)-HLKTFDR(3)	2090.16	null	NP_004159 GeneID:6389 SDHA(541)-NP_004159 GeneID:6389 SDHA(550)/	Intra-Protein							NP_004159	GeneID:6389	SDHA(541)	NP_004159	GeneID:6389	SDHA(550)
	1	mice-tumour-7-F12-1-ex2_FS-65v.14987.14987.4.0.dta	4	2090.15	2.27918e-05	3.60777e-05	-0.011751	-5.62205	1.20186e-07	0.000169826
	2	mice-tumour-7-F12-2-ex2_FS-65v.14849.14849.4.0.dta	4	2090.15	1.77047e-07	0.000465678	-0.009745	-4.66231	8.16318e-07	1.61482e-05
	3	mice-tumour-7-F12-2-ex2_FS-65v.14829.14829.4.0.dta	4	2090.15	0.0930833	0.0158584	-0.009745	-4.66231	1.48304e-05	0.0822736
	4	mice-tumour-7-F12-3-ex2_FS-65V.14558.14558.4.2.dta	4	2090.16	0.101851	0.232687	-0.007832	-3.74707	0.000446757	0.231492
	5	mice-tumour-7-F12-3-ex2_FS-65V.14595.14595.4.1.dta	4	2090.16	0.000113651	0.287291	-0.007832	-3.74707	1.0114e-07	0.000788013
467	ITLVSAAPGKVICEMK(10)-ATGKLIAQGR(4)	2868.6	Carbamidomethyl[C](13)	NP_001153566 GeneID:55856 ACOT13(14)-NP_001153566 GeneID:55856 ACOT13(104)/NP_001153566 GeneID:55856 ACOT13(14)-NP_060943 GeneID:55856 ACOT13(127)/NP_060943 GeneID:55856 ACOT13(37)-NP_001153566 GeneID:55856 ACOT13(104)/NP_060943 GeneID:55856 ACOT13(37)-NP_060943 GeneID:55856 ACOT13(127)/	Intra-Protein							NP_060943	GeneID:55856	ACOT13(37)	NP_060943	GeneID:55856	ACOT13(127)
	1	mice-tumour-7-F8-2-ex2_FS65V.23502.23502.4.2.dta	4	2868.6	5.68787e-06	2.19518e-09	-0.002808	-0.978873	1.90336e-09	7.16864e-05
	2	mice-tumour-7-F8-3-ex2_FS65v.23738.23738.4.2.dta	4	2868.61	5.81545e-07	3.96651e-05	0.00031	0.108066	3.51741e-07	8.29296e-06
	3	mice-tumour-7-F8-1-ex2_FS-65V.23751.23751.4.1.dta	4	2868.6	6.30671e-08	0.00509179	-0.001057	-0.368472	1.21486e-06	6.24381e-06
468	ITTHFELKHLSSGDLLR(8)-SQKASVTP(3)	2921.57	null	NP_001186781 GeneID:50808 AK3(34)-NP_001186782 GeneID:50808 AK3(152)/NP_001186781 GeneID:50808 AK3(34)-NP_001186784 GeneID:50808 AK3(152)/NP_001186781 GeneID:50808 AK3(34)-NP_001186781 GeneID:50808 AK3(182)/NP_001186781 GeneID:50808 AK3(34)-NP_001186785 GeneID:50808 AK3(152)/NP_001186781 GeneID:50808 AK3(34)-NP_057366 GeneID:50808 AK3(222)/NP_057366 GeneID:50808 AK3(34)-NP_001186782 GeneID:50808 …	Intra-Protein							NP_057366	GeneID:50808	AK3(34)	NP_057366	GeneID:50808	AK3(222)
	1	mice-tumour-7-F14-2-ex2_FS-65V.20620.20620.4.0.dta	4	2921.57	0.0924563	0.0870403	-0.007663	-2.6229	1.09249e-09	0.0940322
	2	mice-tumour-7-F14-3-ex2_FS-65V.20616.20616.4.1.dta	4	2921.57	0.0231376	0.08748	-0.004663	-1.59606	9.36575e-06	0.041438
469	IVDGMFAVCGVPESKFR(15)-KGLAPEVADR(1)	3104.59	Carbamidomethyl[C](9)	NP_001265661 GeneID:23438 HARS2(87)-NP_001265661 GeneID:23438 HARS2(114)/NP_001265661 GeneID:23438 HARS2(87)-NP_001265660 GeneID:23438 HARS2(233)/NP_001265661 GeneID:23438 HARS2(87)-NP_036340 GeneID:23438 HARS2(258)/NP_001265660 GeneID:23438 HARS2(206)-NP_001265661 GeneID:23438 HARS2(114)/NP_001265660 GeneID:23438 HARS2(206)-NP_001265660 GeneID:23438 HARS2(233)/NP_001265660 GeneID:23438 HARS2(206…	Intra-Protein							NP_036340	GeneID:23438	HARS2(231)	NP_036340	GeneID:23438	HARS2(258)
	1	mice-tumour-7-F18-1-ex2_FS-65v.25425.25425.4.0.dta	4	3104.58	8.4868e-16	8.67084e-09	-0.006327	-2.03795	5.11641e-16	1.73177e-17
	2	mice-tumour-7-F18-1-ex2_FS-65v.25421.25421.4.0.dta	4	3104.58	0.00802024	2.19723e-07	-0.006296	-2.02797	0.00328622	4.76782e-15
	3	mice-tumour-7-F18-2-ex2_FS-65v.25300.25300.4.0.dta	4	3104.59	6.13311e-20	4.47943e-07	-0.005493	-1.76931	1.77084e-11	8.67359e-25
	4	mice-tumour-7-F18-3-ex2_FS-65v.25370.25370.4.0.dta	4	3104.58	4.14179e-13	6.37537e-05	-0.005874	-1.89204	1.29384e-15	1.56574e-15
470	IVEKLEK(4)-TSIVEKR(6)	1828.08	null	NP_000173 GeneID:3030 HADHA(129)-NP_112486 GeneID:81890 QTRT1(367)/	Inter-Protein							NP_000173	GeneID:3030	HADHA(129)	NP_112486	GeneID:81890	QTRT1(367)
	1	mice-tumour-7-F14-2-ex2_FS-65V.16380.16380.4.0.dta	4	1828.08	0.244939	0.512199	-0.000162	-0.088618	0.613078	0.00866699
471	IVHAFDMEDLGDKAVYCR(13)-DNPKIVHAFDMEDLGDK(4)	4219.98	Carbamidomethyl[C](17)	NP_060934 GeneID:55847 CISD1(68)-NP_060934 GeneID:55847 CISD1(55)/	Intra-Protein							NP_060934	GeneID:55847	CISD1(68)	NP_060934	GeneID:55847	CISD1(55)
	1	mice-tumour-7-F1-2-ex2_FS-45V.26702.26702.4.0.dta	4	4219.98	9.58799e-24	5.98515e-08	-0.001715	-0.4064	2.24937e-15	1.22289e-12
	2	mice-tumour-7-F1-3-ex2_FS-45V.26675.26675.4.0.dta	4	4219.97	5.90711e-07	6.26892e-06	-0.005776	-1.36873	7.6697e-07	1.54382e-08
	3	mice-tumour-7-F1-1-ex2_FS-45.26695.26695.4.0.dta	4	4219.99	1.34867e-07	0.000413727	0.010622	2.51708	1.94144e-08	5.86338e-10
	4	mice-tumour-7-F1-3-ex2_FS-45V.26773.26773.4.0.dta	4	4219.97	0.0231374	0.0150594	-0.007262	-1.72086	0.000292124	0.000334963
	5	mice-tumour-7-F2-1-ex2_FS-45V.26108.26108.4.1.dta	4	4219.97	1	0.0447526	-0.012006	-2.84504	1	1
	6	mice-tumour-7-F2-2-ex2-_FS-45v.26065.26065.4.0.dta	4	4219.98	1	0.193738	0.00126	0.29858	1	1
472	IVHAFDMEDLGDKAVYCR(13)-HNEETGDNVGPLIIKK(15)	4039.99	Carbamidomethyl[C](17)	NP_060934 GeneID:55847 CISD1(68)-NP_060934 GeneID:55847 CISD1(104)/	Intra-Protein							NP_060934	GeneID:55847	CISD1(68)	NP_060934	GeneID:55847	CISD1(104)
	1	mice-tumour-7-F1-2-ex2_FS-45V.23085.23085.4.0.dta	4	4039.98	3.07477e-09	1.65916e-05	-0.005607	-1.38787	5.46936e-11	3.23235e-12
	2	mice-tumour-7-F1-3-ex2_FS-45V.23076.23076.6.3.dta	6	4039.99	1.167e-06	0.000874232	-0.000722	-0.178713	4.18213e-07	0.000204685
	3	mice-tumour-7-F1-1-ex2_FS-45.23141.23141.6.0.dta	6	4040	7.5425e-05	0.00274496	0.006371	1.57698	5.64287e-10	0.000320063
	4	mice-tumour-7-F1-1-ex2_FS-45.23115.23115.6.0.dta	6	4039.99	0.0020501	0.0138052	0.005855	1.44926	3.0319e-06	0.00466729
473	IVHAFDMEDLGDKAVYCR(13)-KFPFCDGAHTK(1)	3583.68	Carbamidomethyl[C](17);Carbamidomethyl[C](26)	NP_060934 GeneID:55847 CISD1(68)-NP_060934 GeneID:55847 CISD1(79)/	Intra-Protein							NP_060934	GeneID:55847	CISD1(68)	NP_060934	GeneID:55847	CISD1(79)
	1	mice-tumour-7-F20-2-ex2_FS-65v.23408.23408.6.2.dta	6	3583.68	0.00183861	2.62185e-08	-0.001425	-0.397636	1	1.06631e-06
	2	mice-tumour-7-F20-2-ex2_FS-65v.23360.23360.6.4.dta	6	3583.68	4.40696e-05	2.65488e-05	-0.00248	-0.692026	0.00245502	1.06737e-07
	3	mice-tumour-7-F20-3-ex2_FS-65v.23461.23461.6.2.dta	6	3583.68	1.41482e-07	7.83286e-05	-0.002703	-0.754252	1	4.72215e-09
	4	mice-tumour-7-F20-3-ex2_FS-65v.23431.23431.6.2.dta	6	3583.68	1.66708e-08	0.000442729	-0.004467	-1.24648	2.51679e-05	7.01715e-10
	5	mice-tumour-7-F20-2-ex2_FS-45v.22075.22075.5.0.dta	5	3583.66	8.6329e-05	0.00858506	-0.025457	-7.10359	0.0296938	1.80564e-05
	6	mice-tumour-7-F20-3-ex2_FS-65v.23368.23368.6.2.dta	6	3583.68	0.0207276	0.0198559	-0.005456	-1.52246	0.0460928	1.27367e-06
	7	mice-tumour-7-F20-2-ex2_FS-65v.23037.23037.6.1.dta	6	3583.68	0.0659299	0.0374774	-0.003851	-1.07459	1	0.0192984
	8	mice-tumour-7-F20-3-ex2_FS-65v.23304.23304.6.3.dta	6	3583.67	0.133083	0.0517443	-0.005802	-1.61901	0.00185409	0.126614
	9	mice-tumour-7-F20-3-ex2_FS-65v.23104.23104.6.2.dta	6	3583.68	0.354191	0.05923	-0.004685	-1.30732	1	0.0364526
	10	mice-tumour-7-F20-1-ex2_FS-45v.22172.22172.4.1.dta	4	3583.65	7.63995e-05	0.0969327	-0.030738	-8.57722	8.75945e-09	0.000180301
	11	mice-tumour-7-F20-3-ex2_FS-45v.21913.21913.4.3.dta	4	3583.65	4.0013e-05	0.171029	-0.029721	-8.29343	0.000351903	0.000221019
	12	mice-tumour-7-F20-1-ex2_FS-65v.23165.23165.6.1.dta	6	3583.67	0.0688008	0.313853	-0.006646	-1.85452	1	0.0554563
	13	mice-tumour-7-F20-1-ex2_FS-65v.23437.23437.6.4.dta	6	3583.68	0.0426196	0.327094	-0.003489	-0.97358	0.0361557	0.0982134
	14	mice-tumour-7-F20-1-ex2_FS-65v.23311.23311.6.2.dta	6	3583.67	1	0.584715	-0.006511	-1.81685	1	1
474	IVKDSLSDDVVK(3)-LQLQPKPR(6)	2434.39	null	NP_001182751 GeneID:84263 HSDL2(245)-NP_001182751 GeneID:84263 HSDL2(231)/NP_001182751 GeneID:84263 HSDL2(245)-NP_115679 GeneID:84263 HSDL2(304)/NP_115679 GeneID:84263 HSDL2(318)-NP_001182751 GeneID:84263 HSDL2(231)/NP_115679 GeneID:84263 HSDL2(318)-NP_115679 GeneID:84263 HSDL2(304)/	Intra-Protein							NP_115679	GeneID:84263	HSDL2(318)	NP_115679	GeneID:84263	HSDL2(304)
	1	mice-tumour-7-F13-1-ex2_FS-45V.15802.15802.3.0.dta	3	2434.38	0.00359802	0.380602	-0.009536	-3.9172	0.00320261	0.000705588
475	IVNSAQTGSFKQLTVK(11)-AIQSLKK(6)	2645.52	null	NP_006467 GeneID:10632 ATP5MG(66)-NP_006467 GeneID:10632 ATP5MG(54)/	Intra-Protein							NP_006467	GeneID:10632	ATP5MG(66)	NP_006467	GeneID:10632	ATP5MG(54)
	1	mice-tumour-7-F8-3-ex2_FS-45v.14406.14406.3.0.dta	3	2645.52	1.36616e-08	2.50653e-05	-0.00442	-1.67075	8.12758e-06	1.9809e-08
	2	mice-tumour-7-F8-1-ex2_FS-45V.14233.14233.4.1.dta	4	2645.52	0.00334984	0.00301592	-0.001263	-0.47741	0.000104539	0.000627354
	3	mice-tumour-7-F8-2-ex2_FS45V.14128.14128.4.2.dta	4	2645.52	0.0578744	0.00656641	-0.00247	-0.933653	1.77554e-06	0.0176736
476	IVQAEGEAEAAKMLGEALSK(12)-NPGYIKLR(6)	3142.68	null	NP_001138303 GeneID:11331 PHB2(236)-NP_001138303 GeneID:11331 PHB2(250)/NP_001138303 GeneID:11331 PHB2(236)-NP_001254629 GeneID:11331 PHB2(212)/	Intra-Protein							NP_001138303	GeneID:11331	PHB2(236)	NP_001138303	GeneID:11331	PHB2(250)
	1	mice-tumour-7-F18-3-ex2_FS-45v.26466.26466.4.0.dta	4	3142.68	0.0509752	1.5743e-05	0.001096	0.348747	0.000138406	0.0464247
	2	mice-tumour-7-F17-3-ex2_FS-45v.26265.26265.4.0.dta	4	3142.68	0.00654557	0.000522977	-0.001674	-0.532666	2.78102e-08	0.00548038
	3	mice-tumour-7-F17-1-ex2_FS-45v.26248.26248.4.0.dta	4	3142.68	0.00916678	0.00120524	-0.001395	-0.443888	1.92796e-08	0.0129741
	4	mice-tumour-7-F17-2-ex2_FS-45v.26333.26333.4.0.dta	4	3142.67	0.122936	0.0220797	-0.007164	-2.27958	2.13972e-06	0.141592
477	IWLKAGLK(4)-DFIEKR(5)	1873.09	null	NP_060370 GeneID:54998 AURKAIP1(179)-NP_002479 GeneID:4695 NDUFA2(39)/NP_060370 GeneID:54998 AURKAIP1(179)-NP_001171941 GeneID:4695 NDUFA2(39)/NP_001120701 GeneID:54998 AURKAIP1(179)-NP_002479 GeneID:4695 NDUFA2(39)/NP_001120701 GeneID:54998 AURKAIP1(179)-NP_001171941 GeneID:4695 NDUFA2(39)/NP_001120702 GeneID:54998 AURKAIP1(179)-NP_002479 GeneID:4695 NDUFA2(39)/NP_001120702 GeneID:54998 AURKAIP1…	Inter-Protein							NP_060370	GeneID:54998	AURKAIP1(179)	NP_002479	GeneID:4695	NDUFA2(13)
	1	mice-tumour-7-F17-3-ex2_FS-65v.20550.20550.3.2.dta	3	1873.1	0.0236684	0.380924	0.000814	0.434575	0.0017431	0.0485392
478	IWLKAGLK(4)-FEKDLR(3)	1873.09	null	NP_060370 GeneID:54998 AURKAIP1(179)-NP_060370 GeneID:54998 AURKAIP1(171)/NP_060370 GeneID:54998 AURKAIP1(179)-NP_001120701 GeneID:54998 AURKAIP1(171)/NP_060370 GeneID:54998 AURKAIP1(179)-NP_001120702 GeneID:54998 AURKAIP1(171)/NP_001120701 GeneID:54998 AURKAIP1(179)-NP_060370 GeneID:54998 AURKAIP1(171)/NP_001120701 GeneID:54998 AURKAIP1(179)-NP_001120701 GeneID:54998 AURKAIP1(171)/NP_001120701 G…	Intra-Protein							NP_060370	GeneID:54998	AURKAIP1(179)	NP_060370	GeneID:54998	AURKAIP1(171)
[truncated: 7,896 more rows]

## Sheet: Supplementary Figure 2
Supplementary Figure 13b: Copy number of mitochondrial proteins involved in all cross-linked peptides detected in all fractionations (including cross-linked, loop-linked and the dead-end peptides).
HepG2 cells							HepG2 tumors
Protein IDs	Averagecopy number H1	Averagecopy number H2	Averagecopy number H3	Average(Averagecopy number H1:Averagecopy number H3)	log10(Average(Averagecopy number H1:Averagecopy number H3))		Protein IDs	Averagecopy number H1	Averagecopy number H2	Averagecopy number H3	Average(Averagecopy number H1:Averagecopy number H3)	log10(Average(Averagecopy number H1:Averagecopy number H3))
C9JQE6;O94911;Q8IUA7;H0Y4U7;Q8IUA7-3;Q8IUA7-4;O94911-2;K7ELK9	0	372.356	448.237	273.531	2.43701		Q8N5Z0;Q8N5Z0-2;D6REB9;D6RFY7;D6RC56;P55809	0	0	0	0	#NUM!
Q3SY69;Q3SY69-3;Q3SY69-2	1000.68	0	0	333.562	2.52318		Q9UDR5;F8WAH1;F8WE53	191649	203323	219440	204804	5.31134
Q96H96;E2QRG7;Q96H96-3;H0YAI0;E7EPM7	0	1114.67	0	371.557	2.57003		C9JQE6;O94911;Q8IUA7;H0Y4U7;Q8IUA7-3;Q8IUA7-4;O94911-2;K7ELK9	0	372.356	448.237	273.531	2.43701
Q6NUN0;Q6NUN0-2;I3L536	1268.29	0	0	422.763	2.6261		Q9NRK6	75278.2	84478	81858.3	80538.2	4.906
Q49AM1	1355.13	0	0	451.711	2.65486		P33897;H0Y7L9;A6NEP8	84735.9	69694.9	71930.8	75453.9	4.87768
J3KP14;Q5THJ4;Q5THJ4-2;H3BLS7;F5GX56;F5GZY2;M0QXS2	526.677	475.749	404.624	469.016	2.67119		P28288;E7EUE1;F5GYC1;P28288-2;P28288-3	465879	567107	549912	527633	5.72233
Q6KCM7;Q6KCM7-3;Q6KCM7-2;Q6KCM7-6;H7C4Z4;M0QZT4;M0QZJ5;E7ESZ5;M0R1W8;M0QZP9;F8WEY9	1481.52	0	0	493.841	2.69359		Q8NFV4;Q8NFV4-4;H7BYM8;H7BZ58;C9J7Q4;Q8NFV4-2;Q8NFV4-3;H0YC52;H7C396;Q8NFV4-5	42844.1	42273.7	39753.4	41623.8	4.61934
Q9UK39	996.878	792.788	0	596.555	2.77565		P42765	1.59476e+06	1.51402e+06	1.658e+06	1.58893e+06	6.2011
Q9H3H1;Q9H3H1-5;Q5QPK7;Q9H3H1-2;Q9H3H1-3;Q3T7B8;Q3T7B5	0	911.76	885.907	599.222	2.77759		Q13085;Q13085-2;Q13085-3;Q59FY4;K4DID9;K7EII5;K7EPF1;K7EJ22;D3YTK0;A8MYL5;REV__Q96DP5;REV__B7Z734;REV__H3BTN9;K7EMF7	90547.3	90905.9	89792	90415.1	4.95624
J3KPL5;Q14596;Q14596-2;B7Z5R6	0	298.908	1710.9	669.935	2.82603		O00763;F8W8T8;O00763-2;H0YGH5;F6QQI9;F5H3T2;F5H8F2;F5H5C3	12095.9	6612.34	10016.7	9575	3.98114
Q9UGC7;Q9UGC7-2;Q9UGC7-4;Q5TF45	1028.96	1141.57	0	723.508	2.85944		Q9UKU7;B7Z5W4;Q6ZWP6;B7Z7F1;E9PLS3;H0YDR9	52473.6	49196.7	24749.9	42140	4.62469
Q9UI17;F8W6P8;B4E1J9;E5RK15;E5RG50	1016.29	553.592	1143.23	904.372	2.95635		Q9H845;H0Y8Z9;D6RCD8	274140	306143	297831	292704	5.46643
Q15390;E5RJS5;E7EP84;H0YBZ4;H0YF01;H7C5V5	0	0	3246.73	1082.24	3.03432		P28330	0	0	5444.6	1814.87	3.25884
Q9NZJ6;Q5T063	3631.26	0	0	1210.42	3.08294		P16219;E9PE82	512538	564900	554956	544131	5.7357
Q96E52;Q96E52-2;H7BZX2	1210.09	1826.51	898.899	1311.84	3.11788		P45954;B4DQ51;H0Y6T4	2.43062e+06	2.35763e+06	2.78644e+06	2.5249e+06	6.40224
J3KPU0;Q9P0J1;E5RIV4;E5RI96;E5RIE5	2190.85	0	1748.13	1312.99	3.11826		P49748-3;P49748;P49748-2;G3V1M7;K7EQP4;J3KSR4;J3QRJ8;K7EJW8;J3QKU9;J3KS89;K7EMF8	628661	655573	666773	650335	5.81314
P50440-2	408.67	2454.89	1542.24	1468.6	3.1669		P24752;H0YEL7;G3XAB4;E9PRQ6	2.56214e+06	2.68003e+06	2.83594e+06	2.6927e+06	6.43019
O00429;O00429-6;O00429-3;B4DGC9	0	1873.85	2791.25	1555.03	3.19174		P53396;P53396-2;B4E3P0;K7EIE7;K7ESG8	1.40634e+06	1.54969e+06	1.60945e+06	1.52183e+06	6.18236
Q330K2;Q330K2-2;H0YBT9;B4DW83;Q330K2-3;H0YC61;H0YBQ9;H0YB46;H7C250;E5RFN5;E5RGD6	1080.36	0	3654.96	1578.44	3.19823		A2A274;Q99798	1.22512e+06	1.2221e+06	1.19892e+06	1.21538e+06	6.08471
Q8NAN2;F8W7S1;Q8NAN2-2	812.205	2509.89	1984.54	1768.88	3.2477		Q9NPJ3;Q9NPJ3-2	1.39348e+06	1.14444e+06	1.28152e+06	1.27314e+06	6.10488
P28330	0	0	5444.6	1814.87	3.25884		O00154;O00154-5;O00154-4;O00154-6;B4DUX0;O00154-3;K7EKP8;O00154-2;F5GWE2	172798	185396	178875	179023	5.25291
Q13472;Q13472-2;B4DK80;H7BZN5;B4DSJ0;J3QR18;K7ELI7;J3QS25;J3KS96;J3KRR9	2030.86	462.112	3129.21	1874.06	3.27278		B4DFQ6;Q96CM8;B4DHT5;E9PF16;B4DUF5;D6RF87;H0Y8N1	188921	229266	230935	216374	5.3352
Q8N0U4;Q8N0U4-3;C9JFL0;Q8N0U4-2	3523.46	0	2367.94	1963.8	3.2931		Q4G176;F5H2G6;F5GX20	54275	89008.4	81582.9	74955.4	4.8748
Q53FZ2;H3BSM0;E7ETR5;Q53FZ2-2;H3BV29;H3BVD5;H3BUF2;H3BT38;H3BR33;Q8NE18;P0C7M7;Q8NE18-2	2286.19	2601.93	1442.22	2110.11	3.32431		P33121;E7EPM6;P33121-2;D6RER0	196660	237471	241195	225109	5.35239
Q53FZ2;H3BSM0;E7ETR5;Q53FZ2-2;H3BV29;H3BVD5;H3BUF2;H3BT38;H3BR33;Q8NE18;P0C7M7;Q8NE18-2	2286.19	2601.93	1442.22	2110.11	3.32431		Q9UKU0-1;Q9UKU0-8;Q9UKU0-6;J3KPG3;Q9UKU0;Q9UKU0-3;Q9UKU0-5;E7ERD7;Q9UKU0-7;Q9UKU0-2;G3V1S9;C9J8C7;C9J3Z0;C9JK59;C9J4I1;C9JPA5;C9JT10	0	0	0	0	#NUM!
Q86TW2;Q86TW2-2;Q9UIE6;G3V426;F8W9Q8;G3V3J2	2584.91	2705.31	1211.14	2167.12	3.33588		Q08AH1;H0YAU5;O75203;Q08AH1-2;E5RFK0	89011.4	68514	66835	74786.8	4.87382
Q9NZB8;Q9NZB8-8;Q9NZB8-2;Q9NZB8-7;Q9NZB8-5;Q9NZB8-6;Q9NZB8-3;Q9NZB8-4;F8WCK1	786.641	3239.79	2578.19	2201.54	3.34273		Q53FZ2;H3BSM0;E7ETR5;Q53FZ2-2;H3BV29;H3BVD5;H3BUF2;H3BT38;H3BR33;Q8NE18;P0C7M7;Q8NE18-2	2286.19	2601.93	1442.22	2110.11	3.32431
Q8IXI2;H7BXZ6;Q8IXI2-5;Q8IXI2-4;Q8IXI2-6;K7EIQ7;K7EP86;J3QLG2;J3KSR5	0	0	6779.3	2259.77	3.35406		Q9NUB1;Q9NUB1-2;Q6ZV30;Q9NUB1-3;Q9NUB1-4;Q5TF43	284193	359785	335258	326412	5.51377
Q9Y234;C9JUU5	2974.28	2520.28	2324.26	2606.27	3.41602		Q9H6R3;Q9H6R3-2;H0YII9;F8VZB4	838619	1.01568e+06	817935	890746	5.94975
Q9GZY8;E9PK16	2922.26	2784.34	2894.84	2867.15	3.45745		Q86TW2;Q86TW2-2;Q9UIE6;G3V426;F8W9Q8;G3V3J2	2584.91	2705.31	1211.14	2167.12	3.33588
O43572;E7EMD6;J3QRM7	2721.8	2470.59	3541.95	2911.45	3.46411		Q8NI60;Q5T7A4;Q8NI60-3;Q5T7A2;Q8NI60-4;E7EVZ8;Q8NI60-2	220779	239938	223160	227959	5.35786
Q96H55;Q96H55-4;Q96H55-3;Q96H55-2;K7ES03;K7EJW5;K7EP95;K7EMZ0	4187.37	2137.33	3000.74	3108.48	3.49255		Q9Y4W6;K7EP56	329310	323916	344329	332518	5.52182
Q9HCL2;Q5VW52	3913.22	2621.12	3349.07	3294.47	3.51779		Q53H12;E9PC15;E9PG39;Q53H12-2	547251	579275	498015	541514	5.73361
Q5U5X0;D6RBV5;D6R994	0	5122.71	5771.9	3631.54	3.56009		P21549	397639	420718	440333	419564	5.6228
Q9NW81-4;Q9NW81;K7EP31;B4DFT4;K7EIV4;M0QZC4;M0QZP7	5596.14	5315.57	0	3637.24	3.56077		O43865;O43865-2	51126.7	63799.7	52875	55933.8	4.74767
O75570	2623.91	4129.55	4737.3	3830.25	3.58323		O95831;O95831-3;O95831-4;Q1L6K4;O95831-2;E9PMA0;O95831-5	1.39737e+06	1.43559e+06	1.61401e+06	1.48232e+06	6.17094
Q70CQ3;B3KUS5;F5H3L3;F5H8D3	3543.68	3616.94	4489.08	3883.23	3.58919		P54819;F8W1A4;P54819-2;P54819-5;P54819-3;F8VY04;F8VZG5;G3V213;F8VPP1	2.20355e+06	1.90456e+06	2.01064e+06	2.03958e+06	6.30954
Q92934;F5H1R6;F5H3B1;A8MXU7;F5GYS3	0	12433.1	0	4144.38	3.61746		Q9UIJ7;Q9UIJ7-3;Q9UIJ7-2	2.43228e+06	2.29015e+06	2.31445e+06	2.34563e+06	6.37026
Q8WV60;E9PFV7;B7Z8L7;D6RGK0;B7Z8R2;D6RIZ0;E5RHU2	8550.82	5113.7	0	4554.84	3.65847		P27144;D3DQ64	2.67064e+06	2.56207e+06	2.64372e+06	2.62548e+06	6.41921
O43169;H3BUX2;D6RFH4	3462.86	3618.07	7014.9	4698.61	3.67197		O43572;E7EMD6;J3QRM7	2721.8	2470.59	3541.95	2911.45	3.46411
Q9HD33-3	5445.9	4920.72	3838.96	4735.19	3.67534		O60218	2.35949e+06	2.07271e+06	2.43633e+06	2.28951e+06	6.35974
Q86UT6;Q86UT6-2;C9J0R6;C9JQE9;C9JLK8	2203.06	7289.39	4914.34	4802.26	3.68145		O43488;H3BLU7;H7C5H7	260360	207924	278880	249055	5.39629
Q5T2R2;Q5T2R2-3;Q5T2R2-2;H0YEE6	2780.12	3947.13	7738.42	4821.89	3.68322		P13196;H7C4H7;H7C5B0	14553.3	12462.9	17000.4	14672.2	4.1665
Q16635;Q16635-5;Q16635-2;Q16635-4;Q16635-3;Q16635-6;Q16635-7;Q16635-8;Q16635-9;Q96F92;C9J9M1;C9J699;Q5HY46;F2Z2H6	4356.62	5044.73	5318.33	4906.56	3.69078		P54886	4.4988e+06	5.06111e+06	5.22596e+06	4.92862e+06	6.69273
E7ETE0;Q9H825;Q9H825-2;B5ME25;H7C2P8;C9JE69;C9J6U8;C9J3F1	4667.65	4930.04	5710.04	5102.58	3.70779		P30837	2.27046e+06	2.56581e+06	2.47675e+06	2.43767e+06	6.38698
Q9H4B0;Q9H4B0-2;Q9H4B0-3;E7EVL7;E5RIL9;E5RGZ1	4681.24	6329.6	5599.6	5536.81	3.74326		O75891;O75891-2;Q8TBP8;C9IZ36;C9JYZ6;C9JY00;D6RFJ7;F8WC34;F2Z324;O60663-3;O60663;O60663-2;B7ZLH2	63151.5	43176.8	41634.9	49321.1	4.69303
Q9BZ23;Q9BZ23-4;Q9BZ23-3;Q9BZ23-2	6120.3	5435.36	5573.17	5709.61	3.75661		Q3SY69;Q3SY69-3;Q3SY69-2	1000.68	0	0	333.562	2.52318
Q5VV89;O14880;Q5VV87	12068.7	0	5255.58	5774.76	3.76153		P05091;F8VXI5;F8W0A9;F8VP50	3.40632e+06	3.53525e+06	3.60996e+06	3.51718e+06	6.54619
Q96HY7;C9JWN1;H7C1J3;H7C149	606.035	10102.7	7143.74	5950.81	3.77458		P30038;P30038-2;D2D4A3;Q5TF55	2.28718e+06	2.39815e+06	2.3134e+06	2.33291e+06	6.3679
Q92843-2;Q92843;G3V2X3;G3V4B7;G3V5A9;G3V3G8	5801.77	6133.47	6172.69	6035.98	3.78075		P51649-2;P51649;F5H328;C9J8Q5	512748	593235	483442	529808	5.72412
Q86VD7	8036.9	3369.97	6823.26	6076.71	3.78367		Q02252;J3KNU8;G3V4Z4	1.06368e+06	1.07564e+06	1.09436e+06	1.07789e+06	6.03258
Q9BV79;Q9BV79-2;H3BM30;Q5SYU3	0	10067	8740.56	6269.17	3.79721		P49419;P49419-2;P49419-4;F8VS02;P49419-3;H0YHM6;F8VVF2;F8WD33;F8WDY6	1.33747e+06	1.37742e+06	1.38536e+06	1.36675e+06	6.13569
Q53R41	5870.8	6554.42	6427.58	6284.27	3.79825		P49189;B4DXY7	139510	169303	149469	152761	5.18401
Q9NX74;E7EUN9;J3QLD5;I3L4Y9;I3L4H0;H3BM64;H3BQX4	3804.69	6653.1	9338.91	6598.9	3.81947		Q13686	0	0	0	0	#NUM!
Q8TD30-2	0	20265.4	0	6755.12	3.82963		Q9UHK6-5;Q9UHK6;D6RB81;Q9UHK6-2;Q9UHK6-4	30827	36457.4	35094.2	34126.2	4.53309
Q8N573-8;Q8N573	9157.35	7274.31	4129.93	6853.86	3.83594		P27695;G3V3M6;G3V5Q1;G3V3C7;G3V359;G3V5M0;G3V5D9;H7C4A8;G3V2D9;G3V574;G3V3Y6	1.18098e+06	1.26396e+06	1.34773e+06	1.26423e+06	6.10182
Q99551;B4DPR9	4181.38	8550.34	8836.92	7189.54	3.8567		Q9BUR5;H7C1U8;Q9BUR5-2;C9J574;G3V1B6	29605.9	31130.9	32349.6	31028.8	4.49177
Q6UB28	6488.35	8238.21	7789.07	7505.21	3.87536		Q6UXV4	111678	86072.7	90119.4	95956.8	4.98208
Q9NVH0;Q9NVH0-2;C9JLF4	4920.9	5633.32	12187.4	7580.54	3.8797		P84085;C9J1Z8;F8WDB3;F8WCJ5	333377	327786	326295	329153	5.5174
O75746;B3KR64;B4DGK6;H0YFB2;F8W9J0	8550.44	9375.11	5113.88	7679.81	3.88535		Q9UH62;H3BV87	133592	173842	173651	160362	5.2051
Q8NFF5;Q8NFF5-2;Q8NFF5-3;Q5T196;Q8NFF5-5;Q8NFF5-4;Q5T191	5521.68	10648.8	8526.69	8232.39	3.91553		Q8NBU5;Q8NBU5-2;B4E2J1	97443.9	98011.9	101843	99099.7	4.99607
Q9Y2W6;Q5SZR4;Q9Y2W6-3;B4DJ68;E9PKN8;B7ZAG4;E9PQX4	3816.59	10729.9	10482.6	8343.05	3.92132		Q9NVI7;Q9NVI7-2;H0Y2W2	917268	966082	952995	945448	5.97564
Q15119;Q15119-2;D6RDN9;D6R983;D6RJH7;D6RHG2;D6RGV8	7444.2	10029.2	8645.24	8706.23	3.93983		Q5T9A4;Q5T9A4-3	17099.7	14347.7	16186.5	15878	4.20079
Q96D53;Q96D53-2;M0R011;M0R001;M0R3F7;M0QZZ2;M0R0L2;M0R340;M0R0F4;M0R307;M0R2F4;M0R362	9133.21	9621.06	8039.42	8931.23	3.95091		P25705;K7ENP3;K7ERX7;K7ESA0	6.50045e+06	8.12537e+06	8.109e+06	7.57827e+06	6.87957
Q9UI32;G5E9X4;B7Z8Q9;C9J3Q2;A8K0A6;F8WBL8;F8WEU7;F8WBC9	4594.28	8754.51	13457.9	8935.56	3.95112		P06576;F8VPV9;H0YH81;F8W0P7;F8VQY0	9.75349e+06	1.05618e+07	1.0429e+07	1.02481e+07	7.01064
Q99698;Q99698-2;Q99698-3;F5H074;REV__Q5VT66-2;REV__Q5VT66;REV__H7BYZ9;REV__Q5VT66-3	8848.17	10104.9	9562.35	9505.12	3.97796		P36542	1.83264e+06	1.89437e+06	1.8494e+06	1.8588e+06	6.26923
O00763;F8W8T8;O00763-2;H0YGH5;F6QQI9;F5H3T2;F5H8F2;F5H5C3	12095.9	6612.34	10016.7	9575	3.98114		P36542-2;B4DL14	0	0	0	0	#NUM!
Q8IYQ7	8831.26	9913.78	10171.7	9638.91	3.98403		P30049	135203	207111	139999	160771	5.20621
B0QY95;Q9NQG6;Q7L890	7938.38	12569.9	8757.5	9755.25	3.98924		P56381;Q5VTU8	1.44536e+06	2.5288e+06	2.74436e+06	2.2395e+06	6.35015
J3KQ88;Q9P0P8	14588.3	14148.5	3892.63	10876.5	4.03649		P24539;Q5QNZ2	2.88008e+06	2.71266e+06	3.04214e+06	2.87829e+06	6.45914
Q8IWL3;B0QYH2;F8WBY7	20181.2	6924.16	6242.52	11116	4.04595		O75947;O75947-2;F5H608	4.47036e+06	4.77775e+06	5.13923e+06	4.79578e+06	6.68086
Q9BXK5;B7Z238;B3KPE7;Q9BXK5-2;E9PDD6;Q8IZP5;F2Z2C3;REV__A4D2H0;REV__A4FU28;REV__P0CG41;REV__Q86UF2;REV__Q8IX94	9098.93	14542.3	11522.9	11721.4	4.06898		P56385	4.604e+06	2.96706e+06	3.27319e+06	3.61475e+06	6.55808
Q96AG3;B4DTA3;B4DY98;B3KRE6;E7EVY2;B7Z6C8	11838.9	12664.7	11347.7	11950.4	4.07738		P18859-2;P18859;A8MUH2	2.06084e+06	1.78563e+06	2.38293e+06	2.07647e+06	6.31733
Q6JQN1-5;Q6JQN1;Q6JQN1-2;F8W1I9;Q6JQN1-4;F8VZG7;Q6JQN1-3;F8W179;F8W0Q4;D6RFF6;F8VWG8;F8VXK4;F8VW35	11461.8	13305.6	11827.5	12198.3	4.0863		P56134;F8W7V3	0	0	0	0	#NUM!
P21953;Q5T2J3	12363.4	12888.9	11802.4	12351.6	4.09172		O75964;E9PN17;Q7Z4Y8	5.7244e+06	6.21941e+06	6.5091e+06	6.15097e+06	6.78894
Q9UHN1;J3KRM2	15586	11622.3	13321.8	13510	4.13066		P48047;H7C0C1;H7C086;H7C068	2.54392e+06	2.33424e+06	2.57036e+06	2.48284e+06	6.39495
B4DIY7;C9J2U4;Q96BW9;B4E101;G3V0F3;H7C1A2	16974.1	10673.2	12923.5	13523.6	4.13109		I3L448;Q5TC12;A8MRA7;I3L1W9;H0YD21;Q5TC12-2;H0YDD6;H0YCA6	87213.8	100018	79212.3	88814.8	4.94849
F5H620;Q96HP4;C9JLB7	14566.8	13627.2	15511.4	14568.5	4.16341		Q9UII2;Q9UII2-2;Q9UII2-3;H7C614	147836	115835	111311	124994	5.09689
P13196;H7C4H7;H7C5B0	14553.3	12462.9	17000.4	14672.2	4.1665		Q13825;Q13825-2;B4DYI6	188017	231793	283824	234545	5.37023
Q8IXI2-3;J9JIH9	12368.4	16108.9	16390.1	14955.8	4.17481		Q9NWT8	0	0	0	0	#NUM!
Q969S9;Q969S9-3;Q969S9-2;Q969S9-4;Q969S9-5;D6RAL1	14225	16348.7	16790.1	15787.9	4.19833		Q07812-2;Q07812;Q07812-8;Q07812-5;Q07812-7;Q07812-4;H0YA56;Q07812-6;M0R2C9	657403	653407	668330	659713	5.81936
Q5T9A4;Q5T9A4-3	17099.7	14347.7	16186.5	15878	4.20079		M0QXF9;M0QZ10;O15382;B3KSI3;M0QZP4;O15382-2;M0R2K7	0	0	0	0	#NUM!
Q08257-3	18038.4	17520.9	12478.4	16012.6	4.20446		Q9BYV7;Q9BYV7-2;Q9BYV7-4;E9PJJ1;E9PBI8;H0YCN8;H0YCL7;E9PS89	0	0	0	0	#NUM!
Q6P1S2;Q6P1S2-2;F8WCI5;F8WDI1	5982.75	16601.9	26887.6	16490.7	4.21724		Q9UMX3	21399.9	13654.2	10467.4	15173.8	4.18109
B4DQL2;Q9HD23;F5GWH3;Q9HD23-2;H7BZ29;B4DMD9	28328.5	6595.59	16808.3	17244.1	4.23664		Q53S33;Q53S33-2	440956	434539	460736	445411	5.64876
O95363;Q5JRF7	17974.4	8874.62	25621.5	17490.2	4.24279		Q86WA6;Q86WA6-2;B4DML3;Q49AI2;H7C0M3;F2Z2Q1	157739	159875	173411	163675	5.21398
O95721;C9JAF7	14988.9	17159.1	20477.5	17541.8	4.24408		O95563;Q5R3B4	542222	732318	700276	658272	5.81841
P51553;E9PDD5;E7EQB8;G5E9Q7;E9PF84;H7C1W2;H7C1R3;H0Y5Q7	16625.7	17861.3	18181.1	17556	4.24443		H7BXW7;Q9Y5U8	630442	627512	607195	621716	5.79359
Q9NPH0;Q9NPH0-2	21926.4	20699	10348.4	17658	4.24694		Q6UW78	0	0	0	0	#NUM!
Q969V5	13689.2	17393.4	22489.1	17857.2	4.25181		H0YKW5;Q9C002	0	0	0	0	#NUM!
Q8IW45;Q8IW45-2;Q8IW45-4;B4DQR1;Q8IW45-3;B7Z3Q0	17043.7	18669.8	19244.5	18319.3	4.26291		Q9NRP2;H3BPT0;H3BPP2;H3BTB6;H3BNN8;H3BQQ1	2548.86	80750.7	93020.3	58773.3	4.76918
Q9Y5J6;F2Z2B0	16132.3	19003.3	20206.5	18447.4	4.26593		Q5JTJ3-2;Q5JTJ3;Q5JTJ3-3	155421	216350	241468	204413	5.31051
Q5TEU4;Q5TEU4-2;B3KR61	19725.9	19338.3	17503.4	18855.8	4.27545		Q07021;I3L3B0;I3L3Q7	2.34232e+06	2.20099e+06	2.2507e+06	2.26467e+06	6.35501
P36404;G3V184	17417.4	21211.1	19153.3	19260.6	4.28467		Q5QPG6;Q9BUV8;Q9BUV8-2;Q9BUV8-3;Q9BUV8-4	237028	287726	182673	235809	5.37256
Q9GZT8;Q9GZT8-2;Q9GZT8-3;E7EXA3;B8ZZI0;C9JN42;H7C1A8	17275.7	20808.9	21290.5	19791.7	4.29648		P30042;H7C1F6;H7C2G3;P30042-2	941427	1.01652e+06	1.18889e+06	1.04895e+06	6.02075
Q9BSH5	28436.7	17209.2	16845.1	20830.3	4.3187		Q8WWC4;H7C0V0	120101	141229	74254.2	111861	5.04868
Q709F0;Q709F0-2;Q709F0-3;D6RDI8;F8WEV0;H0Y9C6	12536.1	24944.2	25237.8	20906	4.32027		Q7L592;C9JS27;Q7L592-2;C9J236;C9JP36;C9JEL7;B4E0W7;H7C3N5	80035	70976.1	78826.3	76612.5	4.8843
P78537;P78537-2;G8JLQ3;F8VP73;F8W036;F8W606;F8W099;F8VNQ1;H0YHA4	29569.3	16326.3	17996.2	21297.3	4.32832		Q8N3R3;Q8N3R3-4	0	0	0	0	#NUM!
B1AKJ5;O43847-2;O43847;G3V1R5;F5H7V1;H0Y5G9	18287.2	21093.8	24529.4	21303.5	4.32845		Q6P1S2;Q6P1S2-2;F8WCI5;F8WDI1	5982.75	16601.9	26887.6	16490.7	4.21724
Q9UDX5;B5MC22;Q9UDX5-2;F8WEN7	26536.2	37834.8	0	21457	4.33157		Q8N5G0;Q8N5G0-2;E5RH91	58934.5	77044.9	78222	71400.5	4.8537
E7EQF2;Q9UKG9;C9J3D7;Q9UKG9-2	19578.8	23866	22709.8	22051.5	4.34344		Q8NE22;Q8NE22-2;C9J935	0	0	0	0	#NUM!
Q6PI78	19370.2	24984.3	22786.9	22380.5	4.34987		Q96KF7	0	0	0	0	#NUM!
Q9UI43;E9PGN6;E7ETL2	24742.7	19775.5	22926.7	22481.6	4.35183		J3KQ88;Q9P0P8	14588.3	14148.5	3892.63	10876.5	4.03649
Q9H019;Q9H019-3;E9PLD2;Q9H019-2;E9PRK5;E9PLU1;C9JF50;E9PPF9;E9PSD6;E9PRW1;E9PPQ0;E9PNJ0	24481.8	19125.5	23985.4	22530.9	4.35278		Q9HAC7;Q9HAC7-4;Q9HAC7-3;Q9HAC7-2;H0Y4N1;B7Z568;H7C0H3	25739.7	27325.3	24174.1	25746.4	4.41072
Q96AQ8	22107.7	30452.9	15239.5	22600	4.35411		Q96EH3	31336.1	30554.2	30798.3	30896.2	4.48991
Q8N442	22435.2	28229.2	18030.3	22898.2	4.3598		Q9GZY4;C9JA07;C9J6J1	21694.6	46037.9	40304.5	36012.3	4.55645
Q15120-2;Q15120	18925.5	24177.6	27028.3	23377.1	4.36879		Q330K2;Q330K2-2;H0YBT9;B4DW83;Q330K2-3;H0YC61;H0YBQ9;H0YB46;H7C250;E5RFN5;E5RGD6	1080.36	0	3654.96	1578.44	3.19823
Q6PML9;D6R9M6	25997.3	25562.2	22345.7	24635.1	4.39155		Q9HBL7	61597.8	67213.4	81449.5	70086.9	4.84564
Q96QE5;J3KTG7;Q96QE5-4	21864.5	25387.3	26667.5	24639.8	4.39164		Q8IW45;Q8IW45-2;Q8IW45-4;B4DQR1;Q8IW45-3;B7Z3Q0	17043.7	18669.8	19244.5	18319.3	4.26291
Q32P41;G3V5X1;G3V494	20814	28865.7	26026.9	25235.5	4.40201		Q9HA77;H0YFF0;F5H623;H0YFV1	156618	107592	105628	123279	5.09089
O14521;E9PIC0;E9PIG3;H3BRW5;E9PK73;G3V173;H0YD41;H0YD96	12519.1	23351.3	39912.6	25261	4.40245		Q14790-9;Q14790-4;Q14790;Q14790-2;Q14790-3;Q14790-7;Q14790-8;Q14790-5;Q14790-6;E7EQ06;E7ETB7;E7EVN1;E7EQ01;H7C0E2;H7BZM4	24078.3	27625.2	25461.7	25721.7	4.4103
Q9UQ90;Q9UQ90-2;H3BTY6;H3BTR8;J3KRF6;H3BMP1	21020.1	28767.7	26228.9	25338.9	4.40379		P04040	1.63926e+06	1.74086e+06	1.79206e+06	1.72406e+06	6.23655
Q14790-9;Q14790-4;Q14790;Q14790-2;Q14790-3;Q14790-7;Q14790-8;Q14790-5;Q14790-6;E7EQ06;E7ETB7;E7EVN1;E7EQ01;H7C0E2;H7BZM4	24078.3	27625.2	25461.7	25721.7	4.4103		P16152;A8MTM1;E9PQ63;B4DFK7;O75828	393191	485944	485588	454908	5.65792
P49247	16880	28639.7	32062.6	25860.8	4.41264		Q6YP21;Q6YP21-3;Q6YP21-2	81758.2	129319	117782	109620	5.03989
Q96BP2;A6NJX6	49191.3	14354.5	14818.6	26121.5	4.417		Q96BQ5	41886.5	39899.7	33804	38530	4.5858
Q6P4A7;E9PGB5;Q6P4A7-2;F2Z386	27152.3	18467.9	33838	26486	4.42302		Q96ER9;Q96ER9-2;C9JSW8;C9JPZ8	31692.3	90129.3	92922.4	71581.3	4.8548
Q9NXH9;Q9NXH9-2;K7EQQ8;K7EJX9;K7EQU7;K7EMZ2;K7ENI9;K7EQY6	32974.7	24459.2	23460.7	26964.9	4.4308		Q9Y2R0;K7EPV0	1.93387e+06	1.66346e+06	1.63751e+06	1.74495e+06	6.24178
Q9BSK2	25405.5	32755.7	23350.6	27170.6	4.4341		Q4VC31;H7C525;C9JQ41;C9JBU9	438165	388215	364550	396977	5.59877
O75027-2;O75027;G3XAC4;B4DGL8;E9PJR8;E9PNQ5	25466.9	25673	31443.2	27527.7	4.43977		Q96AQ8	22107.7	30452.9	15239.5	22600	4.35411
Q86X76-3;Q86X76;Q86X76-4;Q86X76-2;B1AQP4	33129.4	23097.4	27342.8	27856.5	4.44493		Q9GZT6;Q9GZT6-2;H0YF06;B3KP87;J3KN19;E9PPJ7;E9PRC2;H0YD95	57159.9	81919.2	86838.9	75306	4.87683
Q9BQ52;G5E9D5;Q9BQ52-4;E7ES68;Q9BQ52-3;Q9BQ52-2;H7C2I4;H7C3Y9;J3QL08;J3QRS2;J3QLK4;J3QQT1	26287.9	36226.9	22323.7	28279.5	4.45147		Q9NX63;C9JRZ6;F8WAR4;G3V1K1;F8WD73	716861	701358	514065	644095	5.80895
Q9NWX6;H0YC78	19387.6	35551	29904.9	28281.1	4.4515		J3QTA6;Q9BRQ6;J3QTB2;H0Y922	456189	455595	457159	456314	5.65926
Q6IN84	29962.8	33618.9	21593.6	28391.7	4.45319		J3KNE9;Q9BUK0-2;J3KPV1;Q9BUK0;E5RII1;E5RFN2;E5RHM5;E5RJ08	0	0	0	0	#NUM!
K7EKS3;O00411;K7EMH3;K7ESD1	32183.3	27792.3	27494.9	29156.8	4.46474		Q8NE62;C9J7D8;C9JYW4	167219	150195	166347	161254	5.20751
A6NJ78;A6NJ78-2;A6NJ78-4;P0C7V9;F8WD83;A6NJ78-3;B5MC64	33802.4	28072.3	30548.6	30807.7	4.48866		Q9NZ45	1.08492e+06	1.16577e+06	1.32105e+06	1.19058e+06	6.07576
Q96EH3	31336.1	30554.2	30798.3	30896.2	4.48991		P0C7P0	43000.1	57737.9	48966.9	49901.6	4.69811
Q9BUR5;H7C1U8;Q9BUR5-2;C9J574;G3V1B6	29605.9	31130.9	32349.6	31028.8	4.49177		Q9H078-2;Q9H078;Q9H078-3;B4DXW4;H0YGM0;Q9H078-4;F5GX99;Q7Z777;H0YFF5;F5H7A5;F5H392	119848	83629	94145.2	99207.3	4.99654
Q14249	30147.8	22856.4	40864.2	31289.5	4.4954		Q16740;M0R208;M0QYV5	340797	326108	332040	332982	5.52242
Q6DKK2;J3QT19;K7EKH7;K7ERR1;K7EJA1	31499.8	34640	29761.8	31967.2	4.5047		Q7Z7K0;H7C3D8;C9JES7	239659	422364	391206	351076	5.5454
Q9BW91;Q9BW91-2;H7C386;D6RAW2;D6R8Z6	35998	28135.2	32161.1	32098.1	4.50648		Q5EBM0;Q5EBM0-4;Q5EBM0-3;Q5EBM0-2	0	0	0	0	#NUM!
Q9Y276;C9J8G3;H7C492;C9J1S9;H7BZF6;C9JAS4;C9J4Q9	29805.5	32154.5	35238.7	32399.6	4.51054		Q86WW8;B9A057	0	0	0	0	#NUM!
Q9H649	37986.6	28473.6	33102.7	33187.7	4.52098		Q13057-2;Q13057;K7EN91;K7ES73;K7EQ60;K7ESK6;K7EP09;K7EPT0;K7EPC2	171663	184159	235606	197142	5.29478
Q9NTG7;E9PN58;E9PK80;Q9NTG7-2;E9PM75;E9PNA0;B7WNN4	37770.6	36804.7	26268.8	33614.7	4.52653		P21964;P21964-2;E7EMS6;E7EUU8;F8WBW9;H7BZ45	894560	866609	807877	856349	5.93265
Q9H4K7;B4DR85;E7EU10;Q5JXJ0	9479.68	66991.4	24479.8	33650.3	4.52699		Q96MF6;Q96MF6-2;H0YHF1;H0YHW3	0	0	0	0	#NUM!
Q9UG56;H0Y7P7;Q9UG56-2;B1AKM6;B1AKM8	36107.9	36629.4	28222.1	33653.1	4.52703		Q96H96;E2QRG7;Q96H96-3;H0YAI0;E7EPM7	0	1114.67	0	371.557	2.57003
Q9H2K0	44043.2	34993.8	22594.9	33877.3	4.52991		O75208;H3BNT2;H3BSJ5;H3BRC0;H3BPC6;H3BPY0;H3BVA5;O75208-2;H3BPW3	204041	166210	189771	186674	5.27108
Q9UHK6-5;Q9UHK6;D6RB81;Q9UHK6-2;Q9UHK6-4	30827	36457.4	35094.2	34126.2	4.53309		Q9P0S2;G3V2U5	0	43270.3	87251.4	43507.2	4.63856
Q8IUX1;Q8IUX1-4;H0YD74;E9PKZ7;E9PJQ6;E9PKZ9;H0YEG5	28761.3	32129.3	41628.5	34173	4.53368		Q49B96;F8WEL9	93510.9	159765	173686	142321	5.15327
Q9BQ95;K7EMM0;Q9BQ95-2;J3KTF5;K7EN32;K7EPL5;E9PAN9;K7EJI1;K7EJG5;K7EIK2	33961.1	25204.7	44132.2	34432.7	4.53697		P13073;H3BNV9;H3BN72;Q86WV2	2.81337e+06	3.72017e+06	3.76089e+06	3.43147e+06	6.53548
Q16891;Q16891-3	36212.3	30360.9	37819.1	34797.4	4.54155		P20674;H3BNX8;H3BV69;H3BRM5;H3BRI0	3.55153e+06	3.86052e+06	3.95477e+06	3.78894e+06	6.57852
P24311	12308.9	53488.2	39349.2	35048.8	4.54467		P10606	3.27848e+06	3.58025e+06	3.81715e+06	3.55863e+06	6.55128
B4DJI5;Q9BUE6;Q5TBE9;Q5TBE2	39752.4	31868.8	33712.6	35111.3	4.54545		P14854;K7EQD3	551577	661578	657800	623652	5.79494
Q8IWA4;Q8IWA4-3;H7C5H5;Q8IWA4-2;C9JXQ1;C9JQT7	32510.3	39414.1	34725.8	35550	4.55084		P09669	4.726e+06	5.02305e+06	5.79464e+06	5.18123e+06	6.71443
Q9NPE2;Q9NPE2-3	35964.8	31361.3	40167.4	35831.2	4.55426		H0UI06;D6RIE3;P14406;D6RGV5;D6RA35;D6R9C3	1.83291e+06	1.76611e+06	1.93264e+06	1.84389e+06	6.26573
Q8WWV3;Q8WWV3-2;G3V1R2;Q8WWV3-3	39615	32478.5	36233.9	36109.1	4.55762		O14548;H0YBD2;E5RJZ1;E5RFH8	319313	353904	398772	357330	5.55307
Q9NUT2;Q9NUT2-2;G3XAP3;A5D8W3;E7ENE8;C9JTY4;C9JYI3;H7C5K9	42500.2	35838.6	32565.6	36968.2	4.56783		P15954;D6R9Z7	1.11465e+06	1.0024e+06	1.0785e+06	1.06518e+06	6.02742
Q9BUT9;Q9BUT9-2;I3L172	36511.9	41156.2	34930	37532.7	4.57441		P36551;D6RER6;H0YA22	317433	242678	274372	278161	5.4443
Q9P0S9	13763.8	85279.8	16063.8	38369.1	4.58398		J3KQL0;P31327;P31327-2;E7EWJ3;C9JTA4	125424	122067	121027	122839	5.08934
Q96BQ5	41886.5	39899.7	33804	38530	4.5858		P50416;P50416-2;H3BUV7;H3BP22;H3BUJ0;H3BMD2;REV__Q15274;REV__H3BP73	83370.4	86519.4	90144.4	86678	4.93791
Q7Z6M4;B4DFP7;H7C316;B4DKD5;H7C1N9;E7EW93;B5MBW3;C9JX74	36021.1	43376.9	37943.7	39113.9	4.59233		P23786	191309	235646	232272	219742	5.34191
Q5HYK3;B4DP72;F8VVW7;Q5HYK3-2;F8VVD5	39349.2	38035.5	41993.9	39792.8	4.5998		E7EQF2;Q9UKG9;C9J3D7;Q9UKG9-2	19578.8	23866	22709.8	22051.5	4.34344
Q9NUQ2;H0YC22;E5RH21	36058.5	36979.4	46900.5	39979.5	4.60184		Q08257;A6NP24;C9JH92;Q08257-2	1.41071e+06	1.44869e+06	1.78775e+06	1.54905e+06	6.19007
Q9UFN0	43967.2	33806.9	43539	40437.7	4.60679		O75390;B4DJV2;H0YH82;F8W4S1;F8VTT8;H0YIC4;F8W1S4;F8VRI6;F8VU34;F8VR34;F8VVF6;F8W0J2	1.92748e+06	1.82913e+06	1.81928e+06	1.85863e+06	6.26919
Q86TS9;Q86TS9-3;G5E9P5;Q86TS9-2;G3V3U6	37755.3	50942.6	34628.8	41108.9	4.61394		O43169;H3BUX2;D6RFH4	3462.86	3618.07	7014.9	4698.61	3.67197
Q9Y3D5;D6RCM2;H0YAG5	64802.9	23910.7	34741.5	41151.7	4.61439		P00387-3;P00387;P00387-2;B1AHF3	2.74958e+06	2.76551e+06	2.64916e+06	2.72142e+06	6.4348
O75648;O75648-2;O75648-4;O75648-3;O75648-5;B4DZN5;Q2PPL5	35558.4	45825.5	43216.6	41533.5	4.6184		P08574	209526	200174	212998	207566	5.31716
[truncated: 675 more rows]

## Sheet: Supplementary Figure 3
Combine score ranges in STRING	Protein protein interactions (PPIs) count	Percentage of PPIs(%)
[truncated: 9 more rows]
